# Supplementary material for: Synthesis of α-sulfenylated carbonyl compounds under metal-free conditions
Source: Royal Society of Chemistry journal article supplement (doi:10.1039/d3ob01796f), 2023-11-29
Supplement: d3ob01796f1.pdf [file d3ob01796f1.pdf]

## Electronic Supplementary Information

Dan Mou, Yuanyuan Wu, Linda Wang, Ying Fu\* and Zhengyin Du\*

\*Email: clinton\_du@126.com; fu\_yingmail@126.com.

Key Laboratory of Eco-functional Polymer Materials of the Ministry of Education,  
College of Chemistry and Chemical Engineering, Northwest Normal University,  
Lanzhou 730070, P. R. China.

### Contents

|                                                      |           |
|------------------------------------------------------|-----------|
| <b>General Information</b> .....                     | <b>2</b>  |
| <b>Experimental Sections</b> .....                   | <b>3</b>  |
| <b>Control Experiments</b> .....                     | <b>4</b>  |
| <b>Characterization Data of Products</b> .....       | <b>15</b> |
| <b>References</b> .....                              | <b>30</b> |
| <b>NMR and HRMS Spectra Copies of Products</b> ..... | <b>31</b> |

## General Information

All reagents were commercially available and used without any further purification. Unless otherwise stated, all experiments were conducted in a seal tube under argon atmosphere. Reactions were monitored by TLC or GC-MS analysis. Flash column chromatography was performed over silica gel (200-300 mesh).  $^1\text{H}$  NMR,  $^{13}\text{C}$  NMR and  $^{19}\text{F}$  NMR spectra were recorded in  $\text{CDCl}_3$  on Nuclear Magnetic Resonance spectrometer (400 MHz for  $^1\text{H}$  or 600 MHz for  $^1\text{H}$ , 150 MHz for  $^{13}\text{C}$ , 376 MHz for  $^{19}\text{F}$ ) at room temperature. Chemical shifts were reported in ppm on the scale relative to  $\text{CDCl}_3$  ( $\delta = 7.26$  for  $^1\text{H}$  NMR,  $\delta = 77.00$  for  $^{13}\text{C}$  NMR) as an internal reference. Coupling constants ( $J$ ) were reported in Hertz (Hz). High resolution mass spectra were recorded using ZAB-HS Bifocal high-resolution mass spectrometer.

## Experimental Sections

### 1. Synthesis of propargylic alcohols<sup>[1]</sup>

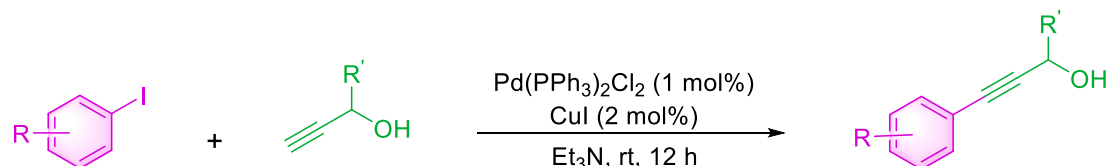

To a 50 mL dry flask equipped with stirring bar was added iodobenzene (1.71 g, 8.4 mmol, 1.2 equiv), Pd(PPh<sub>3</sub>)<sub>2</sub>Cl<sub>2</sub> (49.1 mg, 0.07 mmol, 1 mol%), CuI (26.7 mg, 0.14 mmol, 2 mol%), Et<sub>3</sub>N (8 mL) and stirred for 5 minutes at room temperature. Then propargyl alcohol (392.4 mg, 7.0 mmol, 1.0 equiv) was added and reacted for 12 h. Reaction mixture was filtered through filter paper, solids were washed with ethyl acetate and the combined filtrates were concentrated in vacuo. The target product was purified by column chromatography (PE:EA=5:1).

### 2. General procedures for reactions

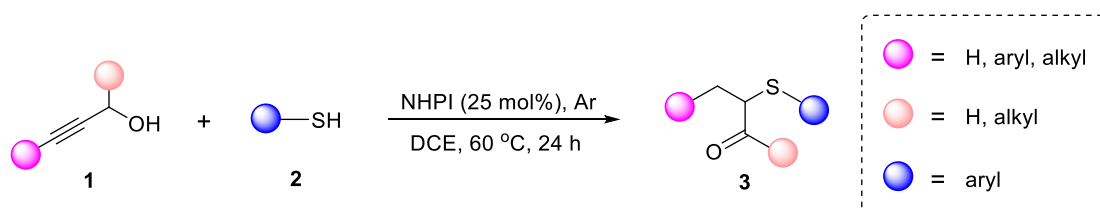

Propargylic alcohols **1** (0.2 mmol, 1.0 equiv), aryl thiols **2** (0.2 mmol, 1.0 equiv), N-hydroxyphthalimide (0.05 mmol, 25% mmol) and dichloroethane (2 mL) were added to a Schlenk tube and reacted at 60 °C for 24 h in the argon atmosphere. After the reaction was completed by TLC, the reaction solution was cooled to room temperature. An appropriate amount of anhydrous sodium sulfate was added to the reaction solution, dried and concentrated by evaporation. The purification was carried out by column chromatography (PE:EA=20:1) to obtain the target product **3**.

## Control Experiments

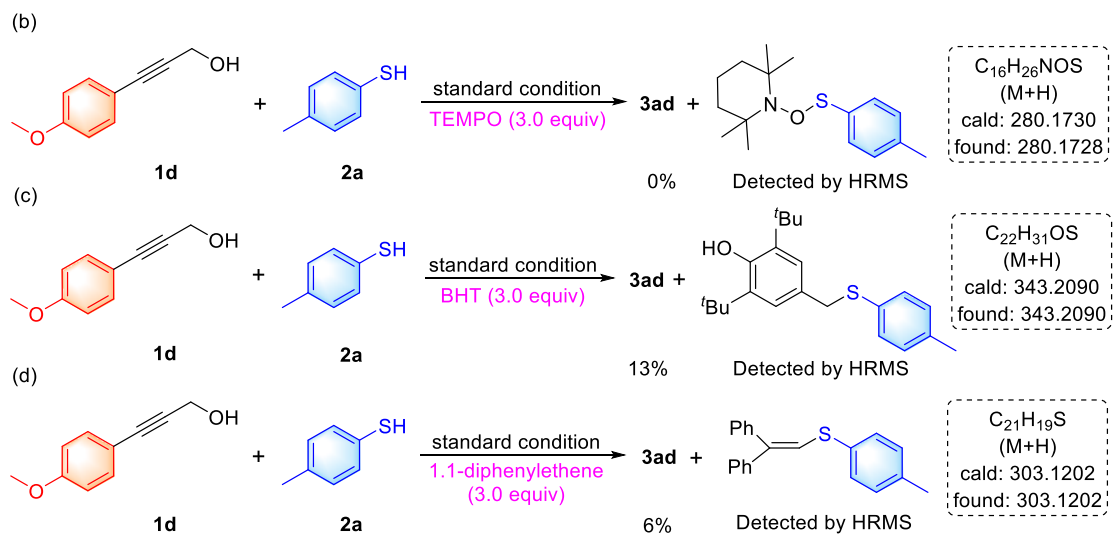

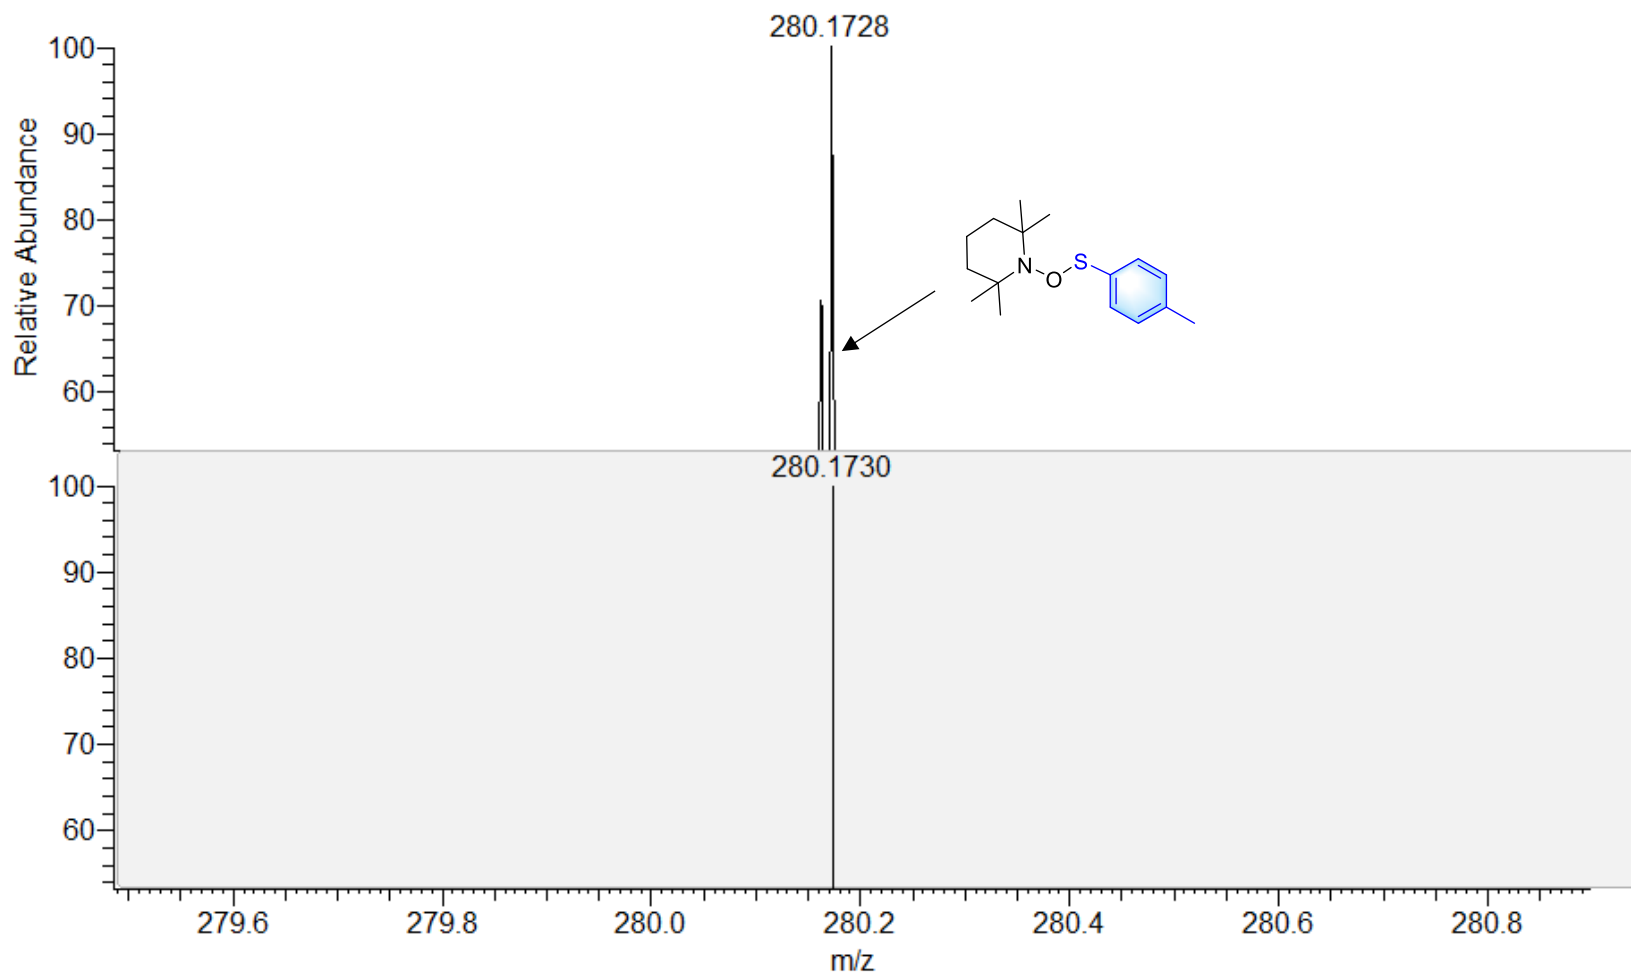

NL:  
1.00E6  
MOUDAN-M9#118  
RT: 0.53 AV: 1 T:  
FTMS + p ESI Full  
ms  
[100.0000-  
750.0000]

NL:  
7.92E5  
C<sub>16</sub> H<sub>25</sub> NOS +H:  
C<sub>16</sub> H<sub>26</sub> N<sub>1</sub> O<sub>1</sub> S<sub>1</sub>  
pa Chrg 1

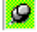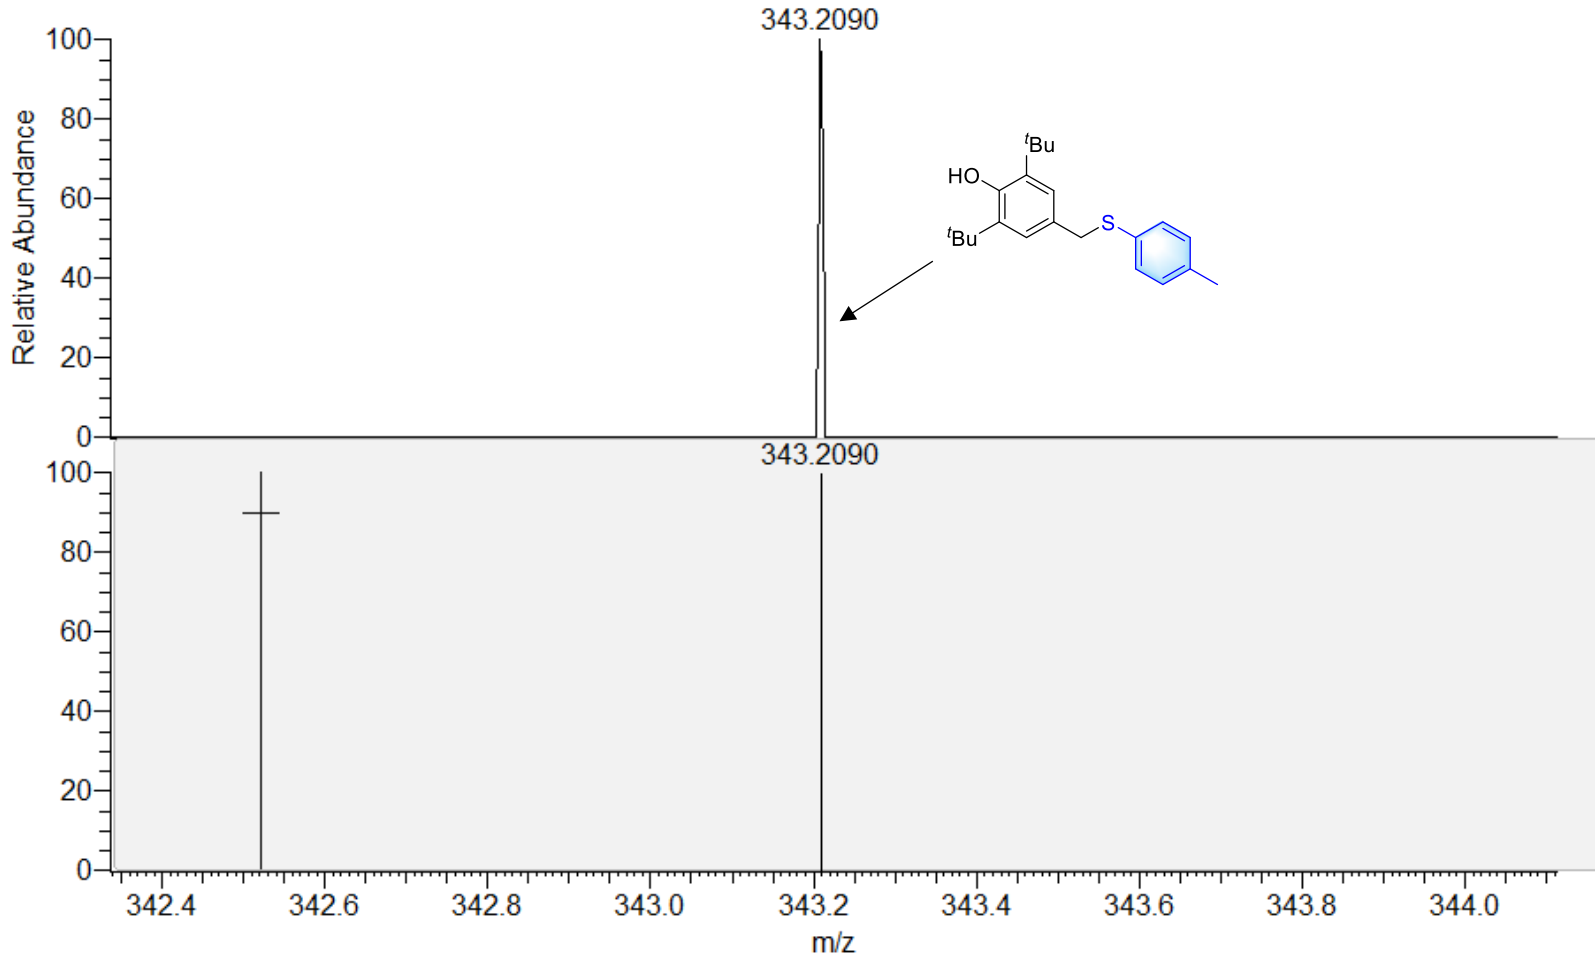

NL:  
5.80E4  
MOUDAN-M9#28  
RT: 0.12 AV: 1 T:  
FTMS + p ESI Full  
lock ms  
[100.0000-  
750.0000]

NL:  
7.45E5  
C<sub>22</sub> H<sub>30</sub> OS +H:  
C<sub>22</sub> H<sub>31</sub> O<sub>1</sub> S<sub>1</sub>  
pa Chrg 1

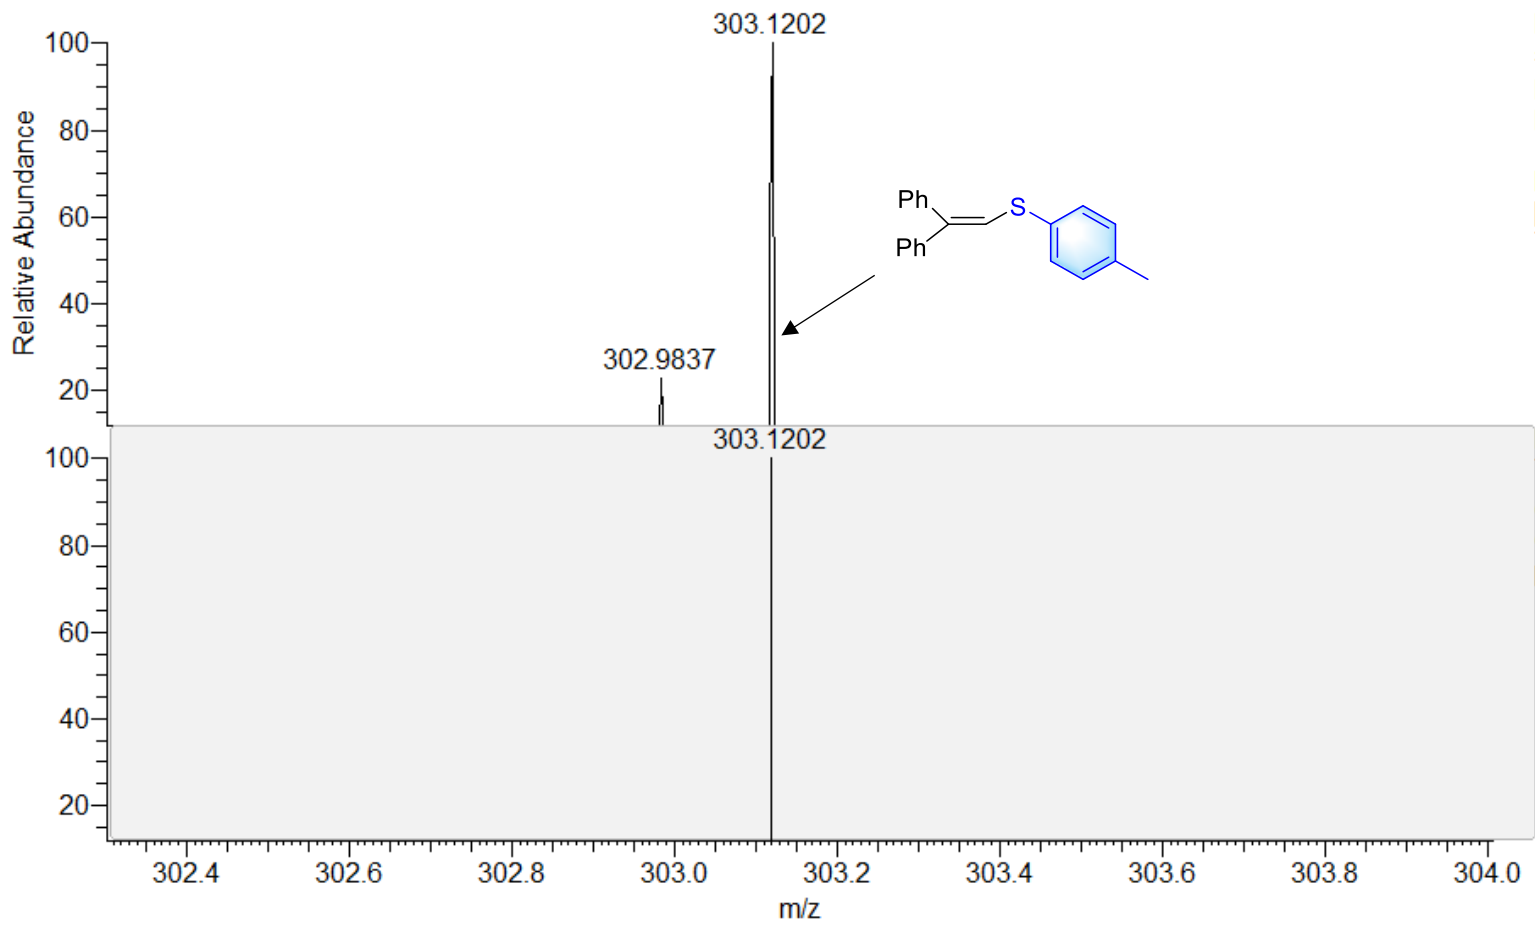

NL:  
5.27E5  
MOUDAN-M9#15  
RT: 0.07 AV: 1 T:  
FTMS + p ESI Full  
lock ms  
[100.0000-  
750.0000]

NL:  
7.56E5  
C<sub>21</sub>H<sub>18</sub>S +H:  
C<sub>21</sub>H<sub>19</sub>S<sub>1</sub>  
pa Chrg 1

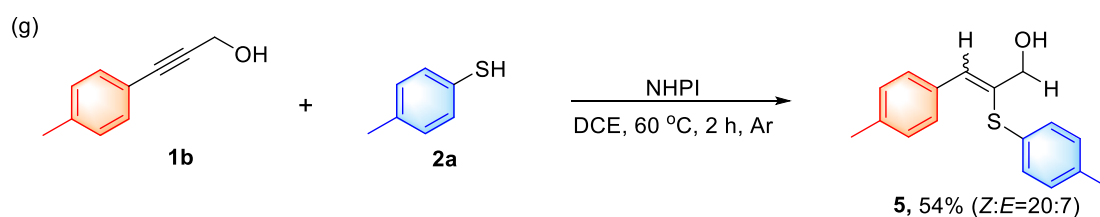

3-(*p*-tolyl)prop-2-yn-1-ol **1b** (0.6 mmol), 4-toluenethiol **2a** (0.6 mmol) and NHPI (25 mol%) were treated in 2.0 mL DCE solvent at 60 °C for 2 h in the argon atmosphere. Column chromatographic purification afforded the *Z*- and *E*- isomers of **5** (87.1 mg., 0.32 mmol, 54%) as a yellow oil (*Z*:*E* = 20:7).

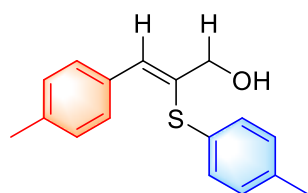

**(*Z*)-3-(*p*-tolyl)-2-(*p*-tolylthio)prop-2-en-1-ol (*Z*)-5**

$^1\text{H NMR}$  (400 MHz,  $\text{CDCl}_3$ )  $\delta$  7.57 (d,  $J = 8.4$  Hz, 2H), 7.30 (d,  $J = 8.0$  Hz, 2H), 7.18 (d,  $J = 8.0$  Hz, 2H), 7.12-7.10 (m, 2H), 7.06 (s, 1H), 4.18 (s, 2H), 2.38 (s, 3H), 2.34 (s, 3H), 2.18 (s, 1H).  $^{13}\text{C NMR}$  (150 MHz,  $\text{CDCl}_3$ )  $\delta$  137.7, 137.3, 133.2, 133.0, 132.4, 131.1, 129.9, 129.5, 129.4, 128.9, 66.3, 21.3, 21.1.

**ESI-HRMS:**  $m/z$   $[\text{M}+\text{H}]^+$  calcd for  $\text{C}_{17}\text{H}_{19}\text{OS}$  271.1151, found 271.1151.

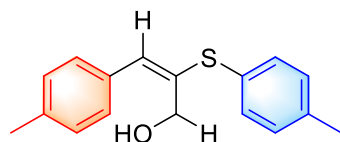

**(*E*)-3-(*p*-tolyl)-2-(*p*-tolylthio)prop-2-en-1-ol (*E*)-5**

$^1\text{H NMR}$  (400 MHz,  $\text{CDCl}_3$ )  $\delta$  7.37 (d,  $J = 8.0$  Hz, 2H), 7.23 (d,  $J = 8.0$  Hz, 2H), 7.16 (d,  $J = 8.0$  Hz, 4H), 6.85 (s, 1H), 4.32 (s, 2H), 2.35 (s, 6H), 2.05 (s, 1H).  $^{13}\text{C NMR}$  (150 MHz,  $\text{CDCl}_3$ )  $\delta$  137.8, 137.6, 136.4, 134.5, 133.2, 132.0, 130.1, 129.7, 129.2, 128.6, 60.3, 21.2, 21.1.

**ESI-HRMS:**  $m/z$   $[\text{M}+\text{H}]^+$  calcd for  $\text{C}_{17}\text{H}_{19}\text{OS}$  271.1151, found 271.1149.



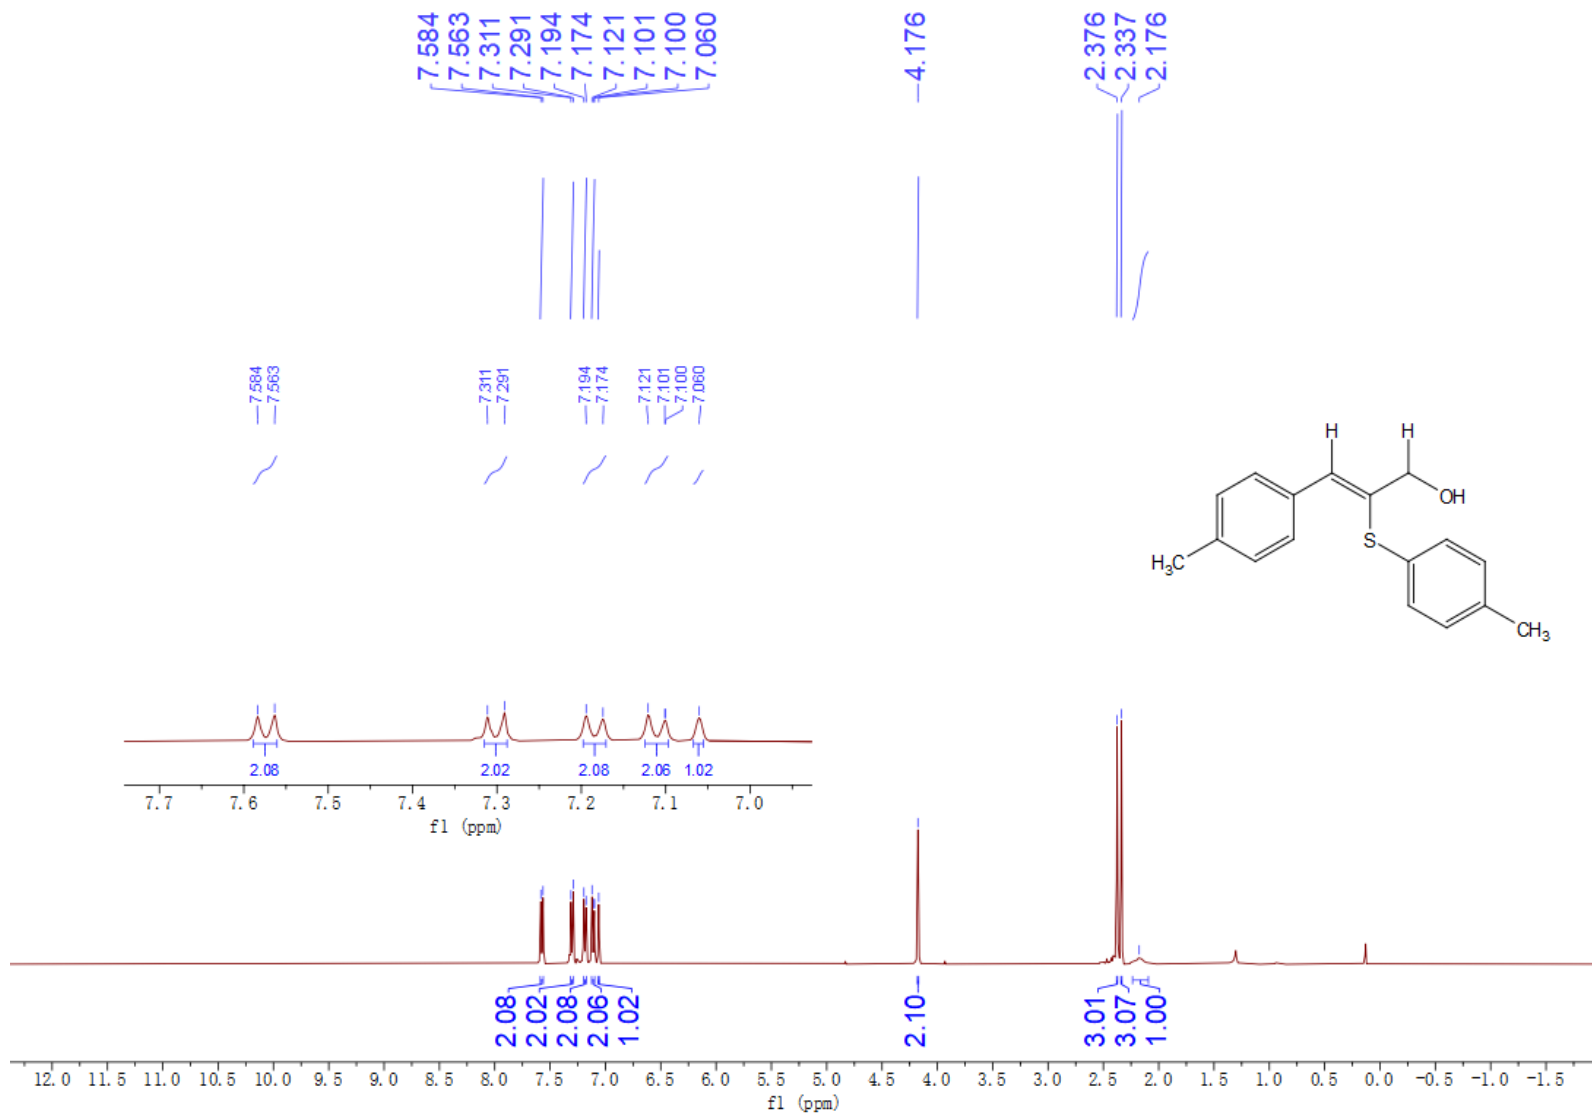

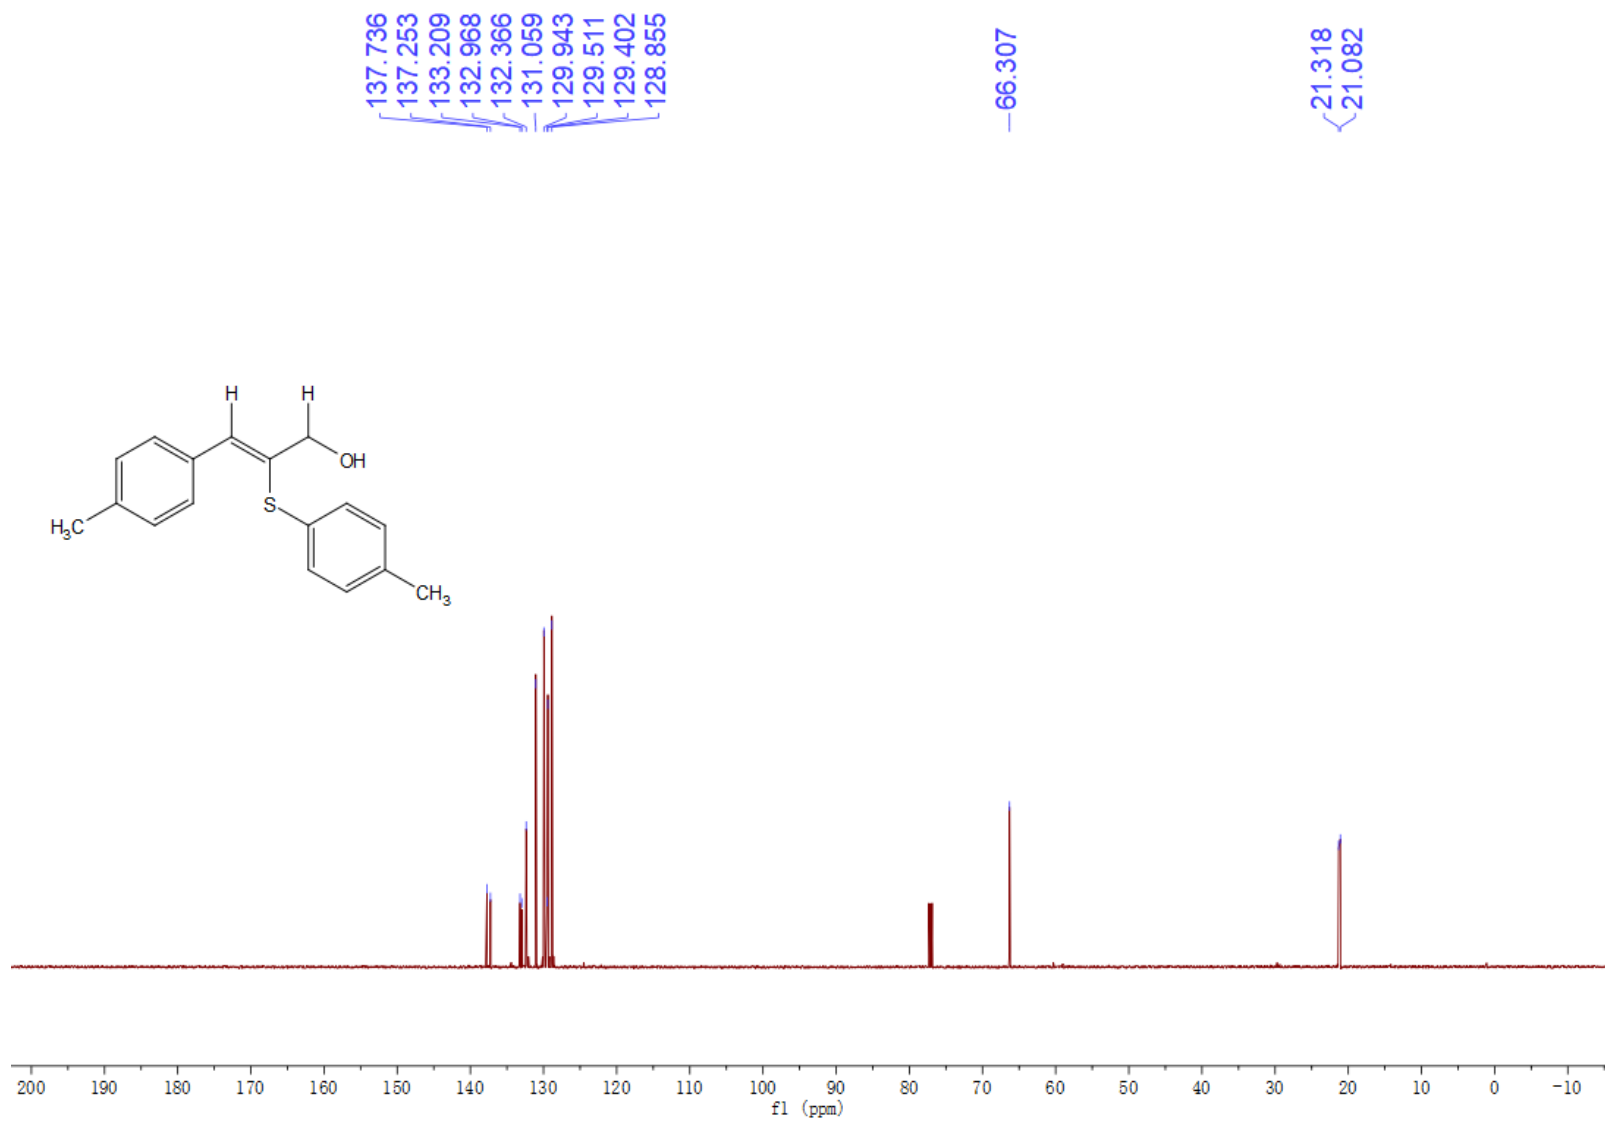

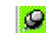

NL:  
1.51E6  
MOUDAN-M39#75  
RT: 0.33 AV: 1 T:  
FTMS + p ESI Full  
ms  
[50.0000-  
750.0000]

NL:  
7.87E5  
C<sub>17</sub>H<sub>18</sub>OS +H:  
C<sub>17</sub>H<sub>19</sub>O<sub>1</sub>S<sub>1</sub>  
pa Chrg 1

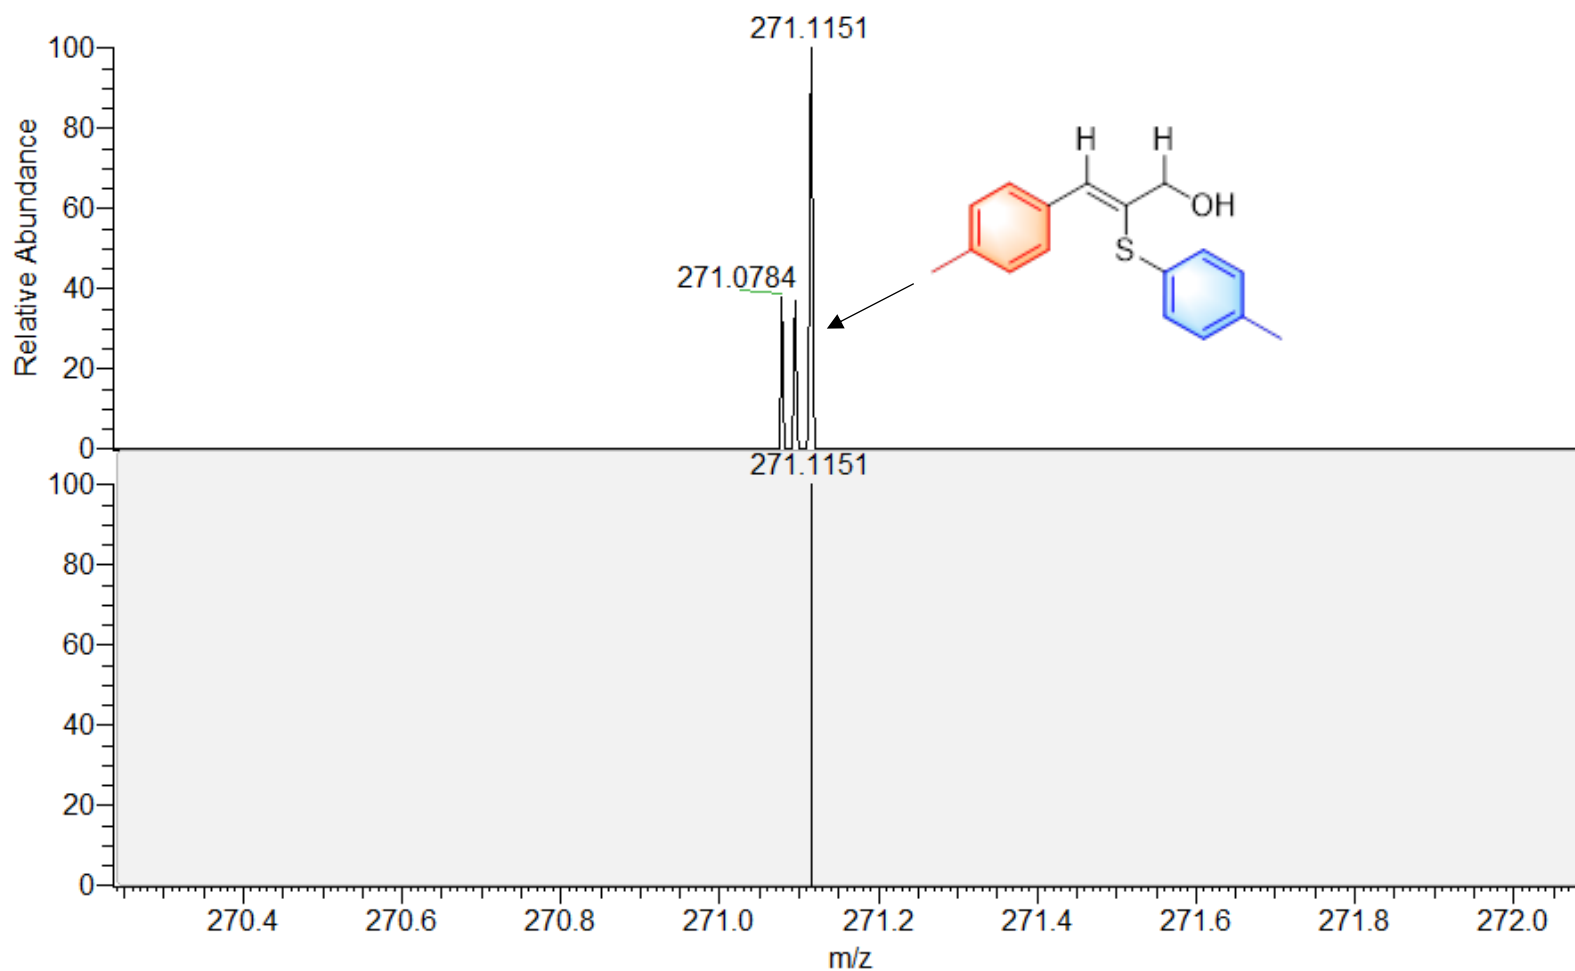

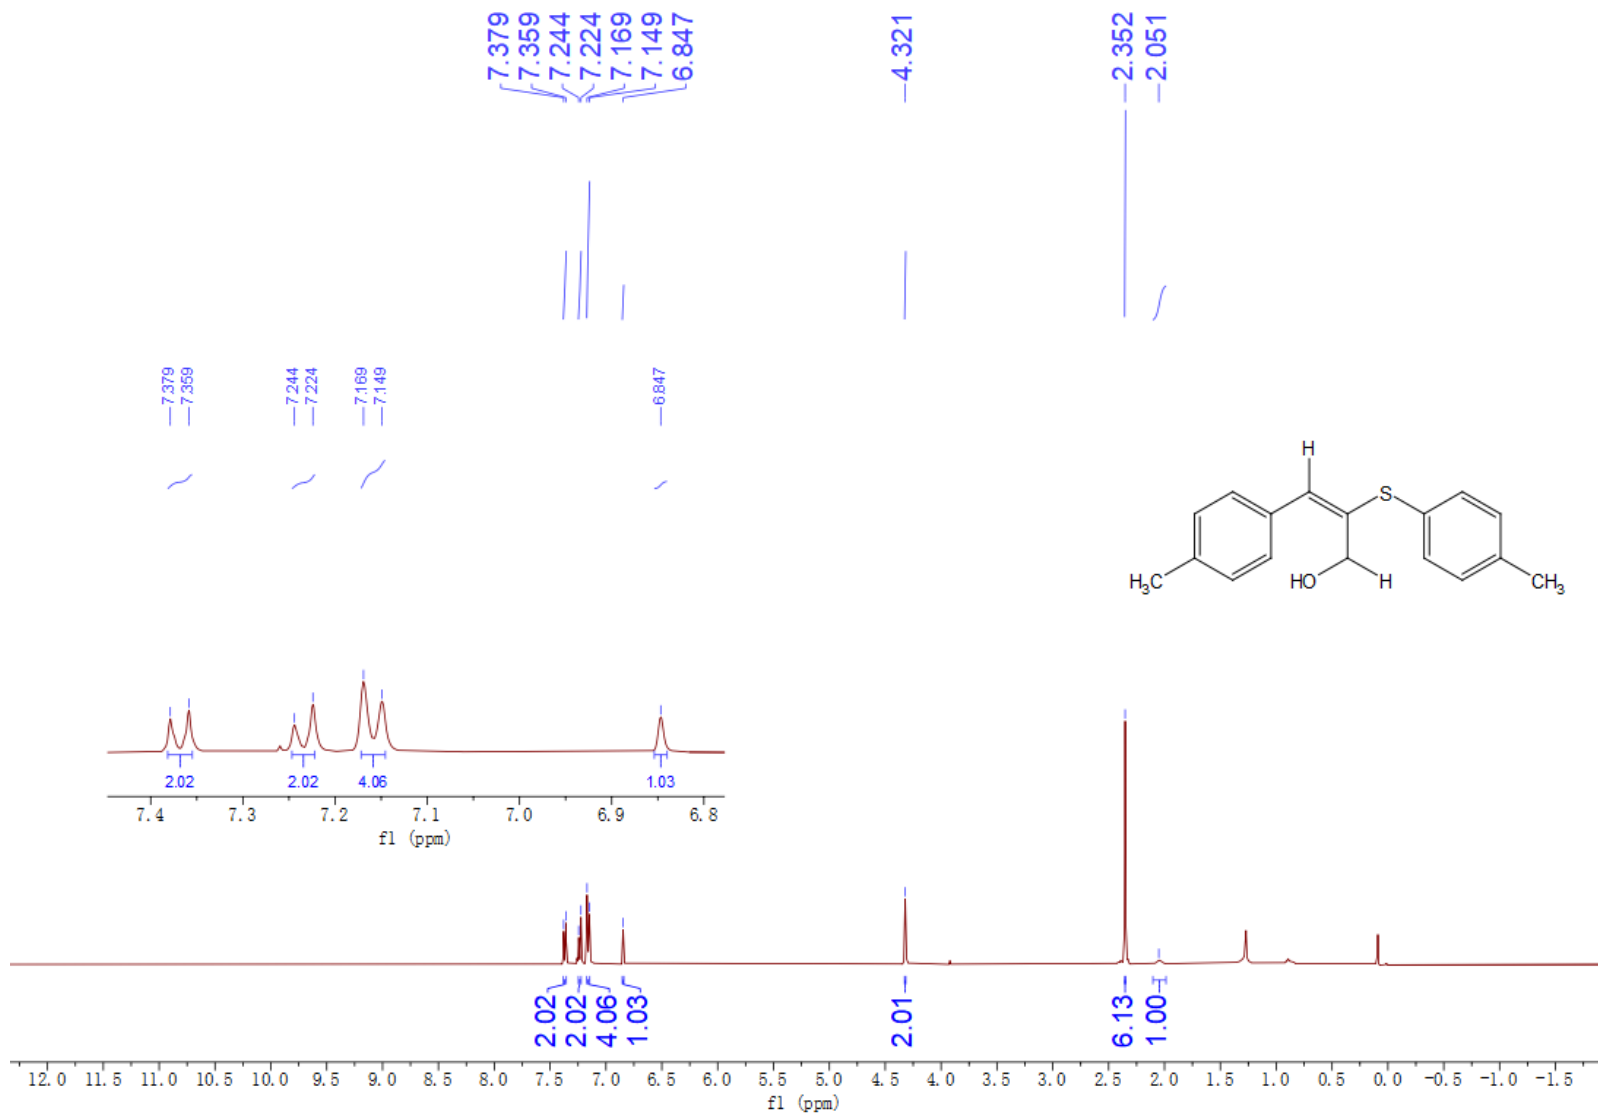

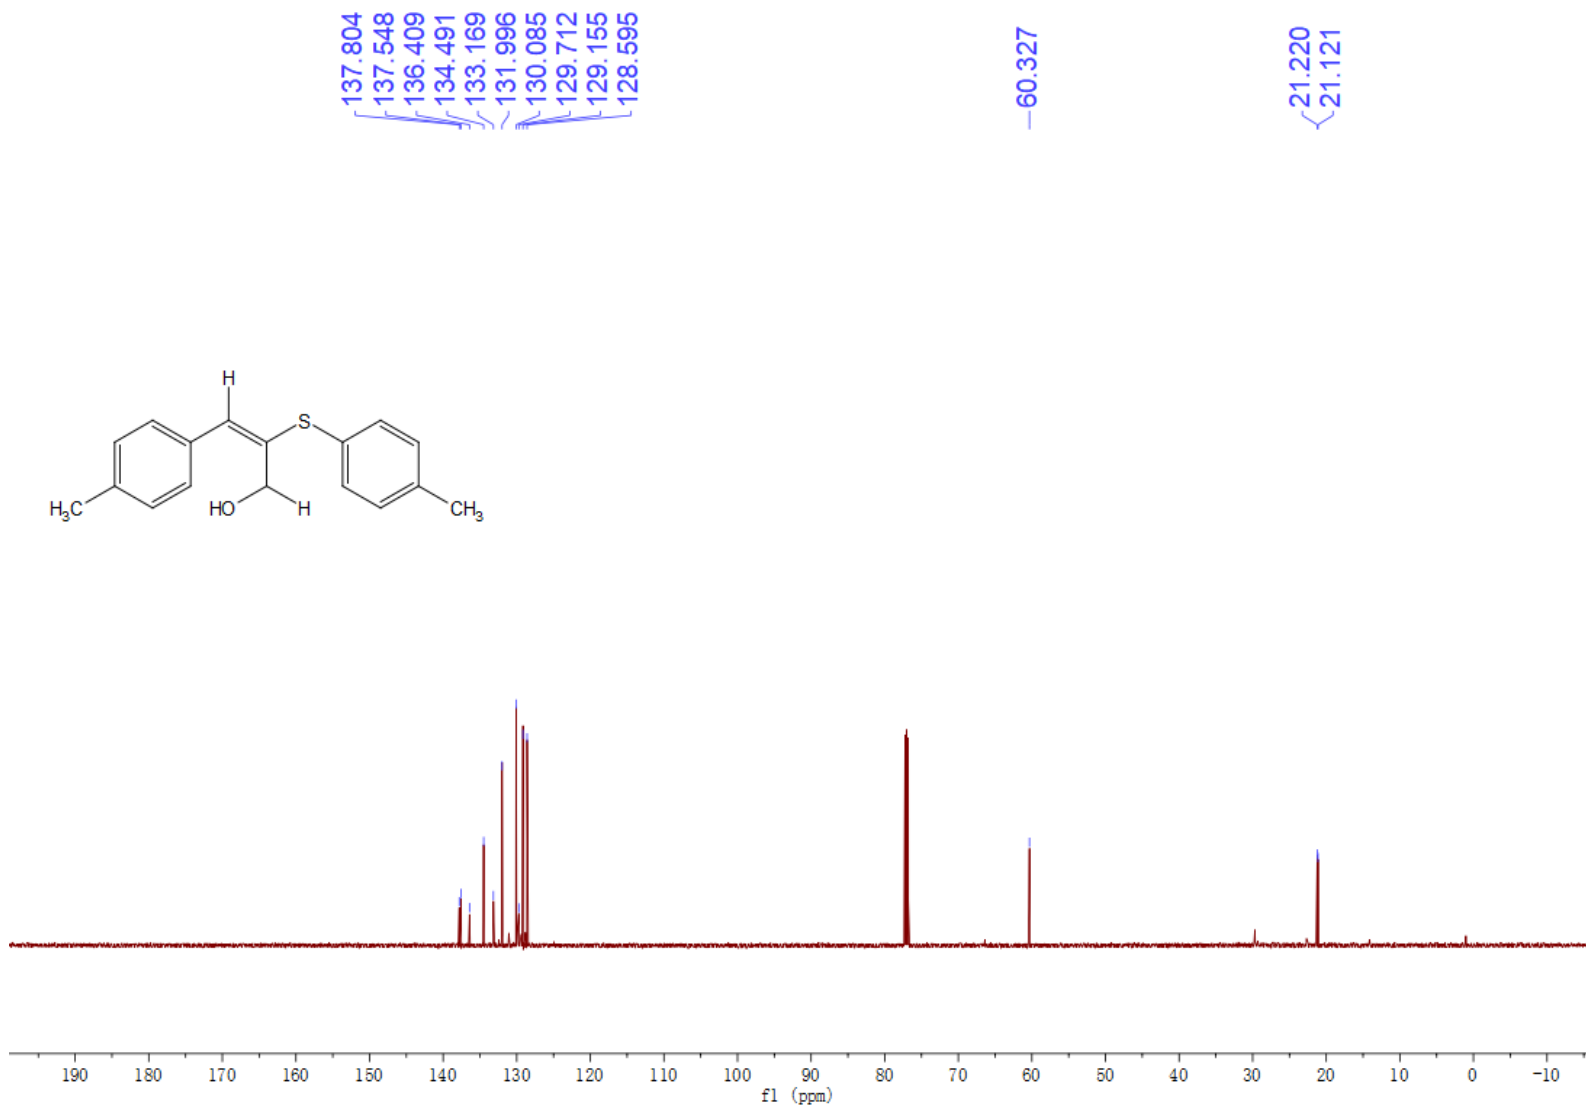

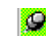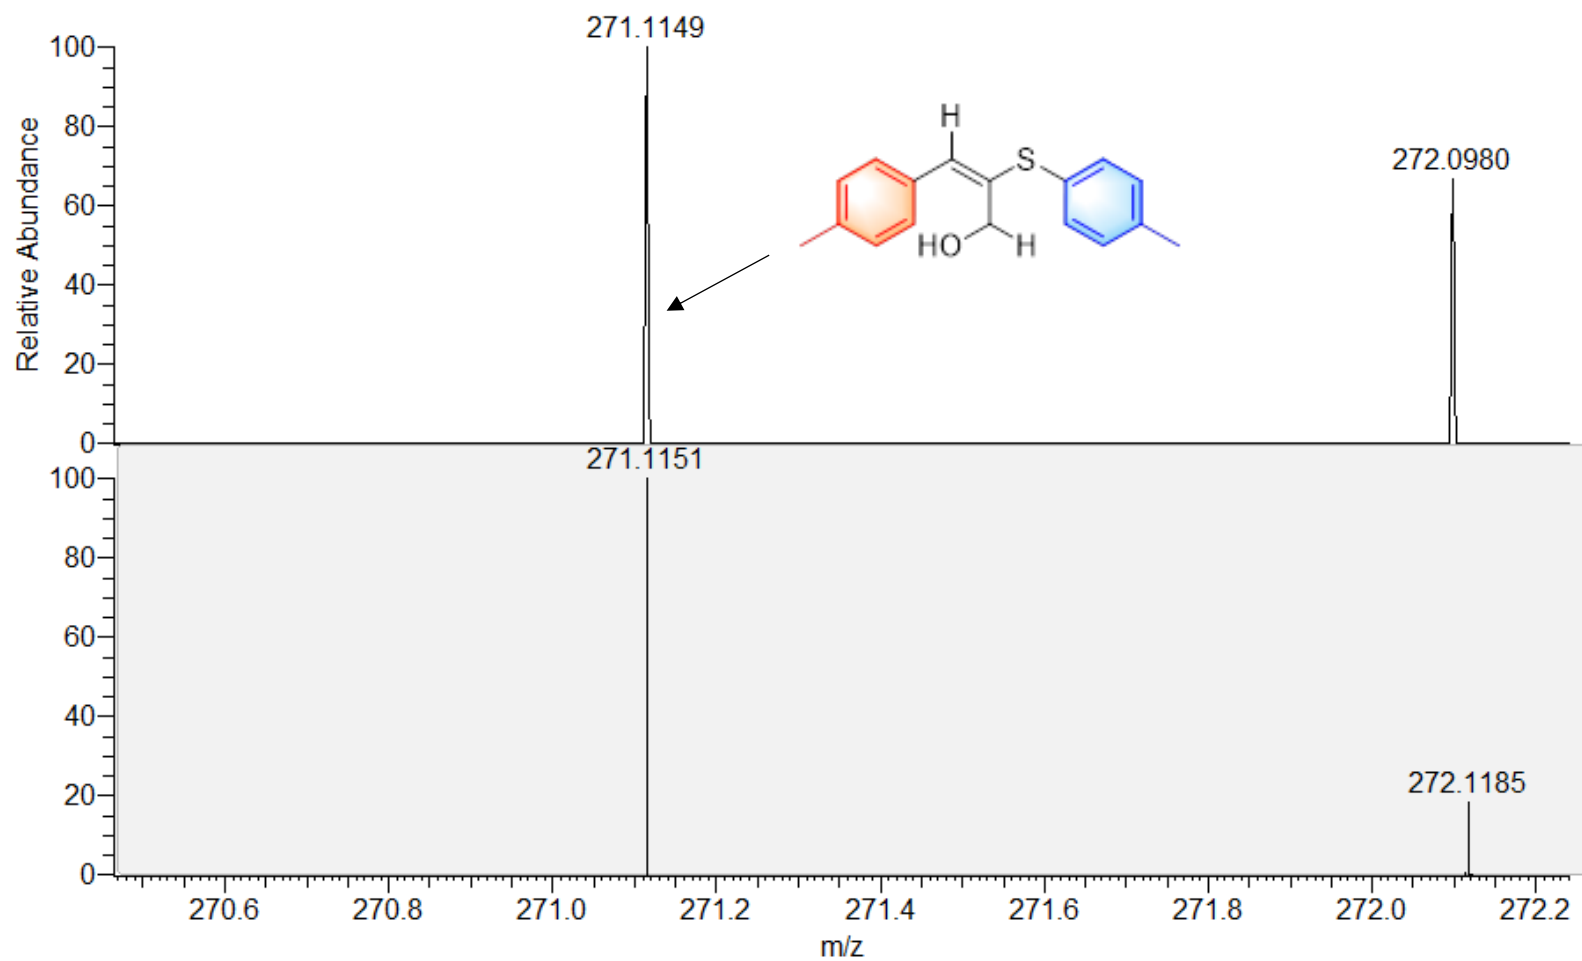

NL:  
5.55E5  
MOUDAN-M38#98  
RT: 0.44 AV: 1 T:  
FTMS + p ESI Full  
ms  
[50.0000-  
750.0000]

NL:  
7.87E5  
C<sub>17</sub> H<sub>18</sub> OS +H:  
C<sub>17</sub> H<sub>19</sub> O<sub>1</sub> S<sub>1</sub>  
pa Chrg 1

## Characterization Data of Products

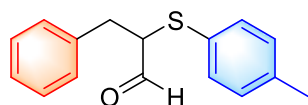

### 3-phenyl-2-(*p*-tolylthio)propanal (3aa)

Yellow oil, 43.2 mg, 84% yield, PE:EA=20:1.

$^1\text{H NMR}$  (400 MHz,  $\text{CDCl}_3$ )  $\delta$  9.48 (d,  $J = 3.2$  Hz, 1H), 7.32-7.22 (m, 7H), 7.12 (d,  $J = 8.0$  Hz, 2H), 3.78-3.73 (m, 1H), 3.17 (dd,  $J = 14.4, 8.0$  Hz, 1H), 2.96 (dd,  $J = 14.6, 6.6$  Hz, 1H), 2.34 (s, 3H).  $^{13}\text{C NMR}$  (150 MHz,  $\text{CDCl}_3$ )  $\delta$  193.9, 138.9, 137.4, 134.1, 130.0, 129.1, 128.6, 127.4, 126.9, 58.3, 34.1, 21.2.

**ESI-HRMS:**  $m/z$   $[\text{M}+\text{H}]^+$  calcd for  $\text{C}_{16}\text{H}_{17}\text{OS}$  257.0995, found 257.0998.

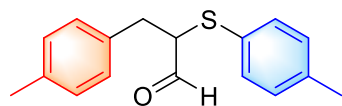

### 3-(*p*-tolyl)-2-(*p*-tolylthio)propanal (3ab)

Yellow oil, 42.4 mg, 78% yield, PE:EA=20:1.

$^1\text{H NMR}$  (400 MHz,  $\text{CDCl}_3$ )  $\delta$  9.44 (d,  $J = 3.6$  Hz, 1H), 7.27 (d,  $J = 8.4$  Hz, 2H), 7.10 (d,  $J = 4.8$  Hz, 6H), 3.75-3.70 (m, 1H), 3.11 (dd,  $J = 14.4, 8.4$  Hz, 1H), 2.92 (dd,  $J = 14.4, 6.8$  Hz, 1H), 2.32 (s, 6H).  $^{13}\text{C NMR}$  (150 MHz,  $\text{CDCl}_3$ )  $\delta$  194.1, 138.8, 136.5, 134.2, 134.0, 130.0, 129.3, 128.9, 127.4, 58.3, 33.7, 21.2.

**ESI-HRMS:**  $m/z$   $[\text{M}+\text{H}]^+$  calcd for  $\text{C}_{17}\text{H}_{19}\text{OS}$  271.1151, found 271.1151.

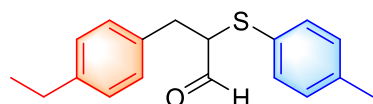

### 3-(4-ethylphenyl)-2-(*p*-tolylthio)propanal (3ac)

Yellow oil, 44.0 mg, 77% yield, PE:EA=20:1.

$^1\text{H NMR}$  (400 MHz,  $\text{CDCl}_3$ )  $\delta$  9.45 (d,  $J = 3.6$  Hz, 1H), 7.27 (d,  $J = 8.0$  Hz, 2H), 7.14-7.10 (m, 6H), 3.76-3.72 (m, 1H), 3.13 (dd,  $J = 14.4, 8.4$  Hz, 1H), 2.93 (dd,  $J = 14.4, 6.8$  Hz, 1H), 2.63 (dd,  $J = 15.2, 7.6$  Hz, 2H), 2.33 (s, 3H), 1.23 (t,  $J = 7.6$  Hz, 3H).  $^{13}\text{C NMR}$  (150 MHz,  $\text{CDCl}_3$ )  $\delta$  194.1, 142.9, 138.8, 134.4, 134.0, 130.0, 129.0, 128.1, 127.5, 58.3, 33.8, 28.4, 21.2, 15.5.

**ESI-HRMS:**  $m/z$   $[\text{M}+\text{H}]^+$  calcd for  $\text{C}_{18}\text{H}_{21}\text{OS}$  285.1308, found 285.1308.

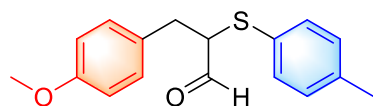

### 3-(4-methoxyphenyl)-2-(*p*-tolylthio)propanal (3ad)

Yellow oil, 46.6 mg, 81% yield, PE:EA=20:1.

$^1\text{H NMR}$  (400 MHz,  $\text{CDCl}_3$ )  $\delta$  9.45 (d,  $J = 3.6$  Hz, 1H), 7.28 (d,  $J = 8.0$  Hz, 2H), 7.15-7.10 (m, 4H), 6.84 (d,  $J = 8.4$  Hz, 2H), 3.79 (s, 3H), 3.73-3.69 (m, 1H), 3.10 (dd,  $J = 14.4, 8.4$  Hz, 1H), 2.91 (dd,  $J = 14.4, 6.8$  Hz, 1H), 2.33 (s, 3H).  $^{13}\text{C NMR}$  (150 MHz,  $\text{CDCl}_3$ )  $\delta$  194.2, 158.5, 138.8, 134.0, 130.1, 130.0, 129.3, 127.5, 114.0, 58.5, 55.2, 33.4, 21.2.

**ESI-HRMS:**  $m/z$   $[\text{M}+\text{H}]^+$  calcd for  $\text{C}_{17}\text{H}_{19}\text{O}_2\text{S}$  287.1100, found 287.1098.

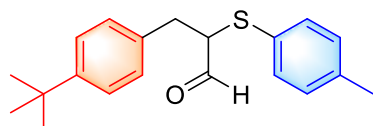

### 3-(4-(*tert*-butyl)phenyl)-2-(*p*-tolylthio)propanal (3ae)

Yellow oil, 50.0 mg, 80% yield, PE:EA=20:1.

$^1\text{H NMR}$  (400 MHz,  $\text{CDCl}_3$ )  $\delta$  9.46 (d,  $J = 3.6$  Hz, 1H), 7.33 (d,  $J = 8.4$  Hz, 2H), 7.28 (d,  $J = 8.0$  Hz, 2H), 7.15 (d,  $J = 8.4$  Hz, 2H), 7.11 (d,  $J = 7.6$  Hz, 2H), 3.77-3.73 (m, 1H), 3.13 (dd,  $J = 14.4, 8.4$  Hz, 1H), 2.94 (dd,  $J = 14.4, 6.4$  Hz, 1H), 2.33 (s, 3H), 1.31 (s, 9H).  $^{13}\text{C NMR}$  (150 MHz,  $\text{CDCl}_3$ )  $\delta$  194.1, 149.7, 138.8, 134.2, 134.0, 130.0, 128.7, 127.5, 125.5, 58.2, 34.4, 33.7, 31.3, 21.2.

**ESI-HRMS:**  $m/z$   $[\text{M}+\text{H}]^+$  calcd for  $\text{C}_{20}\text{H}_{25}\text{OS}$  313.1621, found 313.1618.

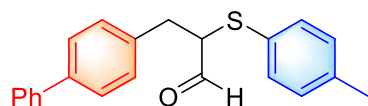

### 3-([1,1'-biphenyl]-4-yl)-2-(*p*-tolylthio)propanal (3af)

Yellow oil, 50.0 mg, 75% yield, PE:EA=20:1.

$^1\text{H NMR}$  (400 MHz,  $\text{CDCl}_3$ )  $\delta$  9.51 (d,  $J = 3.6$  Hz, 1H), 7.56 (dd,  $J = 16.4, 7.6$  Hz, 4H), 7.44 (t,  $J = 7.2$  Hz, 2H), 7.35 (t,  $J = 7.6$  Hz, 1H), 7.30 (d,  $J = 7.6$  Hz, 4H), 7.13 (d,  $J = 8.0$  Hz, 2H), 3.79 (td,  $J = 7.6, 3.2$  Hz, 1H), 3.21 (dd,  $J = 14.4, 8.0$  Hz, 1H), 3.00 (dd,  $J = 14.4, 6.8$  Hz, 1H), 2.34 (s, 3H).  $^{13}\text{C NMR}$  (150 MHz,  $\text{CDCl}_3$ )  $\delta$  194.0, 140.7, 139.8, 139.0, 136.4, 134.2, 130.0, 129.5, 128.7, 127.3, 127.3, 127.2, 127.0, 58.3, 33.8, 21.2.

**ESI-HRMS:**  $m/z$   $[\text{M}+\text{Na}]^+$  calcd for  $\text{C}_{22}\text{H}_{20}\text{OSNa}$  355.1127, found 355.1123.

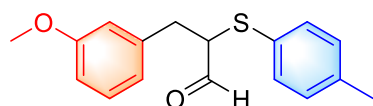

### 3-(3-methoxyphenyl)-2-(*p*-tolylthio)propanal (3ag)

Yellow oil, 45.4 mg, 79% yield, PE:EA=20:1.



**<sup>1</sup>H NMR (400 MHz, CDCl<sub>3</sub>)** δ 9.46 (d, *J* = 3.2 Hz, 1H), 7.29-7.20 (m, 3H), 7.11 (d, *J* = 8.0 Hz, 2H), 6.82-6.77 (m, 3H), 3.79 (s, 3H), 3.75 (td, *J* = 7.2, 3.6 Hz, 1H), 3.13 (dd, *J* = 14.4, 8.4 Hz, 1H), 2.93 (dd, *J* = 14.4, 6.4 Hz, 1H), 2.33 (s, 3H). **<sup>13</sup>C NMR (150 MHz, CDCl<sub>3</sub>)** δ 193.9, 159.7, 138.9, 138.9, 134.1, 130.0, 129.6, 127.3, 121.4, 114.9, 112.2, 58.1, 55.2, 34.2, 21.2.

**ESI-HRMS:** *m/z* [M+H]<sup>+</sup> calcd for C<sub>17</sub>H<sub>19</sub>O<sub>2</sub>S 287.1100, found 287.1099.

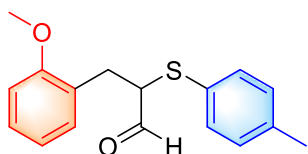

### 3-(2-methoxyphenyl)-2-(*p*-tolylthio)propanal (3ah)

Yellow oil, 44.7 mg, 78% yield, PE:EA=20:1.

**<sup>1</sup>H NMR (400 MHz, CDCl<sub>3</sub>)** δ 9.42 (d, *J* = 4.4 Hz, 1H), 7.30-7.22 (m, 3H), 7.17 (dd, *J* = 7.6, 1.6 Hz, 1H), 7.10 (d, *J* = 8.0 Hz, 2H), 6.92-6.84 (m, 2H), 3.88-3.84 (m, 1H), 3.81 (s, 3H), 3.17 (dd, *J* = 13.8, 8.6 Hz, 1H), 2.97 (dd, *J* = 13.8, 6.2 Hz, 1H), 2.33 (s, 3H). **<sup>13</sup>C NMR (150 MHz, CDCl<sub>3</sub>)** δ 194.4, 157.4, 138.5, 133.6, 131.1, 129.9, 128.4, 128.1, 125.5, 120.5, 110.3, 56.8, 55.1, 29.8, 21.1.

**ESI-HRMS:** *m/z* [M+H]<sup>+</sup> calcd for C<sub>17</sub>H<sub>19</sub>O<sub>2</sub>S 287.1100, found 287.1100.

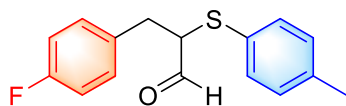

### 3-(4-fluorophenyl)-2-(*p*-tolylthio)propanal (3ai)

Yellow oil, 36.3 mg, 66% yield, PE:EA=20:1.

**<sup>1</sup>H NMR (400 MHz, CDCl<sub>3</sub>)** δ 9.48 (d, *J* = 3.2 Hz, 1H), 7.27-7.25 (m, 2H), 7.19-7.16 (m, 2H), 7.11 (d, *J* = 8.0 Hz, 2H), 6.99 (t, *J* = 8.4 Hz, 2H), 3.69 (td, *J* = 7.2, 3.2 Hz, 1H), 3.13 (dd, *J* = 14.4, 8.0 Hz, 1H), 2.91 (dd, *J* = 14.4, 6.8 Hz, 1H), 2.33 (s, 3H). **<sup>13</sup>C NMR (150 MHz, CDCl<sub>3</sub>)** δ 193.8, 161.8 (d, *J*<sub>C-F</sub> = 243.8 Hz), 139.1, 134.2, 133.1 (d, *J*<sub>C-F</sub> = 3.2 Hz), 130.6 (d, *J*<sub>C-F</sub> = 8.0 Hz), 130.0, 127.1, 115.4 (d, *J*<sub>C-F</sub> = 21.2 Hz), 58.4 (d, *J*<sub>C-F</sub> = 0.9 Hz), 33.3, 21.1. **<sup>19</sup>F NMR (376 MHz, CDCl<sub>3</sub>)** δ -115.89 (m).

**ESI-HRMS:** *m/z* [M+H]<sup>+</sup> calcd for C<sub>16</sub>H<sub>16</sub>FOS 275.0900, found 275.0900.

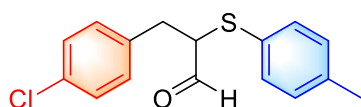

### 3-(4-chlorophenyl)-2-(*p*-tolylthio)propanal (3aj)

Yellow oil, 40.8 mg, 70% yield, PE:EA=20:1.

**<sup>1</sup>H NMR (400 MHz, CDCl<sub>3</sub>)** δ 9.49 (d, *J* = 2.8 Hz, 1H), 7.28-7.25 (m, 4H), 7.13 (dd, *J* = 13.8, 8.2 Hz, 4H), 3.69 (td, *J* = 7.6, 2.8 Hz, 1H), 3.13 (dd, *J* = 14.4, 8.0 Hz, 1H), 2.89 (dd, *J* = 14.4, 6.8 Hz, 1H), 2.33 (s, 3H). **<sup>13</sup>C NMR (150 MHz, CDCl<sub>3</sub>)** δ 193.7, 139.1, 135.9, 134.3, 132.7, 130.5, 130.1, 128.7, 127.0, 58.2, 33.4, 21.2.

**ESI-HRMS:** *m/z* [M+H]<sup>+</sup> calcd for C<sub>16</sub>H<sub>16</sub>ClOS 291.0605, found 291.0610.

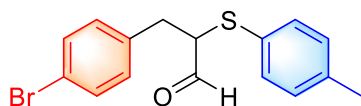

### 3-(4-bromophenyl)-2-(*p*-tolylthio)propanal (3ak)

Yellow oil, 49.0 mg, 73% yield, PE:EA=20:1.

**<sup>1</sup>H NMR (400 MHz, CDCl<sub>3</sub>)** δ 9.49 (d, *J* = 2.8 Hz, 1H), 7.42 (d, *J* = 8.4 Hz, 2H), 7.26 (d, *J* = 8.0 Hz, 2H), 7.10 (t, *J* = 8.4 Hz, 4H), 3.69 (td, *J* = 7.6, 2.8 Hz, 1H), 3.11 (dd, *J* = 14.4, 8.0 Hz, 1H), 2.88 (dd, *J* = 14.4, 6.8 Hz, 1H), 2.33 (s, 3H). **<sup>13</sup>C NMR (150 MHz, CDCl<sub>3</sub>)** δ 193.6, 139.1, 136.5, 134.3, 131.7, 130.9, 130.1, 126.9, 120.8, 58.1, 33.4, 21.2.

**ESI-HRMS:** *m/z* [M+ Na]<sup>+</sup> calcd for C<sub>16</sub>H<sub>15</sub>BrOSNa 356.9919, found 356.9917.

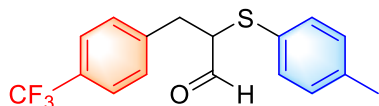

### 2-(*p*-tolylthio)-3-(4-(trifluoromethyl)phenyl)propanal (3al)

Yellow oil, 40.7 mg, 63% yield, PE:EA=20:1.

**<sup>1</sup>H NMR (400 MHz, CDCl<sub>3</sub>)** δ 9.53 (d, *J* = 2.8 Hz, 1H), 7.56 (d, *J* = 8.0 Hz, 2H), 7.34 (d, *J* = 8.0 Hz, 2H), 7.26 (d, *J* = 8.0 Hz, 2H), 7.12 (d, *J* = 7.6 Hz, 2H), 3.73 (td, *J* = 7.6, 2.8 Hz, 1H), 3.22 (dd, *J* = 14.4, 7.6 Hz, 1H), 2.97 (dd, *J* = 14.4, 7.2 Hz, 1H), 2.33 (s, 3H). **<sup>13</sup>C NMR (150 MHz, CDCl<sub>3</sub>)** δ 193.4, 141.7 (d, *J*<sub>C-F</sub> = 1.1 Hz), 139.3, 134.4, 130.1, 129.5, 129.2 (d, *J*<sub>C-F</sub> = 32.3 Hz), 126.7, 125.5 (dd, *J*<sub>C-F</sub> = 7.5, 3.8 Hz), 124.1 (d, *J*<sub>C-F</sub> = 270.5 Hz), 58.0, 33.7, 21.2. **<sup>19</sup>F NMR (376 MHz, CDCl<sub>3</sub>)** δ -62.49 (s).

**ESI-HRMS:** *m/z* [M+H]<sup>+</sup> calcd for C<sub>17</sub>H<sub>16</sub>F<sub>3</sub>OS 325.0868, found 325.0864.

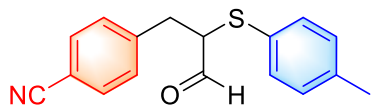

### 4-(3-oxo-2-(*p*-tolylthio)propyl)benzonitrile (3am)

Yellow oil, 34.5 mg, 61% yield, PE:EA=10:1.

**<sup>1</sup>H NMR (400 MHz, CDCl<sub>3</sub>)** δ 9.54-9.53 (m, 1H), 7.59 (d, *J* = 8.0 Hz, 2H), 7.33 (d, *J* = 7.6 Hz, 2H), 7.24 (d, *J* = 8.0 Hz, 2H), 7.12 (d, *J* = 7.6 Hz, 2H), 3.71 (td, *J* = 7.2, 2.0 Hz, 1H), 3.21 (dd, *J* = 14.6, 7.8 Hz, 1H), 2.95 (dd, *J* = 14.6, 7.0 Hz, 1H), 2.33 (s, 3H).

$^{13}\text{C}$  NMR (150 MHz,  $\text{CDCl}_3$ )  $\delta$  193.2, 143.2, 139.5, 134.5, 132.3, 130.1, 130.0, 129.8, 128.5, 126.5, 118.7, 110.8, 57.7, 33.9, 21.2.

ESI-HRMS:  $m/z$   $[\text{M}+\text{H}]^+$  calcd for  $\text{C}_{17}\text{H}_{16}\text{NOS}$  282.0947, found 282.0948.

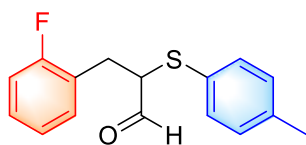

### 3-(2-fluorophenyl)-2-(*p*-tolylthio)propanal (3an)

Yellow oil, 35.6 mg, 65% yield, PE:EA=20:1.

$^1\text{H}$  NMR (400 MHz,  $\text{CDCl}_3$ )  $\delta$  9.50 (d,  $J = 3.2$  Hz, 1H), 7.28-7.21 (m, 4H), 7.12-7.03 (m, 4H), 3.81 (td,  $J = 7.2, 2.8$  Hz, 1H), 3.18 (dd,  $J = 14.4, 8.0$  Hz, 1H), 2.99 (dd,  $J = 14.2, 7.0$  Hz, 1H), 2.33 (s, 3H).  $^{13}\text{C}$  NMR (150 MHz,  $\text{CDCl}_3$ )  $\delta$  193.7, 161.2 (d,  $J_{\text{C-F}} = 244.2$  Hz), 139.0, 134.2, 131.6 (d,  $J_{\text{C-F}} = 4.4$  Hz), 130.0, 129.9 (d,  $J_{\text{C-F}} = 3.5$  Hz), 128.8 (d,  $J_{\text{C-F}} = 8.1$  Hz), 127.2, 124.1 (d,  $J_{\text{C-F}} = 3.6$  Hz), 115.4 (d,  $J_{\text{C-F}} = 21.8$  Hz), 57.0 (d,  $J_{\text{C-F}} = 1.5$  Hz), 27.9 (d,  $J_{\text{C-F}} = 2.1$  Hz), 21.2.  $^{19}\text{F}$  NMR (376 MHz,  $\text{CDCl}_3$ )  $\delta$  -117.22 (m).

ESI-HRMS:  $m/z$   $[\text{M}+\text{H}]^+$  calcd for  $\text{C}_{16}\text{H}_{16}\text{FOS}$  275.0900, found 275.0900.

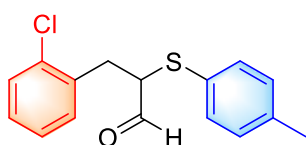

### 3-(2-chlorophenyl)-2-(*p*-tolylthio)propanal (3ao)

Yellow oil, 39.6 mg, 68% yield, PE:EA=20:1.

$^1\text{H}$  NMR (400 MHz,  $\text{CDCl}_3$ )  $\delta$  9.51 (d,  $J = 2.8$  Hz, 1H), 7.37-7.35 (m, 1H), 7.29-7.26 (m, 3H), 7.21-7.18 (m, 2H), 7.11 (d,  $J = 8.0$  Hz, 2H), 3.91-3.87 (m, 1H), 3.28 (dd,  $J = 14.4, 8.0$  Hz, 1H), 3.07 (dd,  $J = 14.4, 6.8$  Hz, 1H), 2.33 (s, 3H).  $^{13}\text{C}$  NMR (150 MHz,  $\text{CDCl}_3$ )  $\delta$  193.5, 139.0, 135.2, 134.2, 134.1, 131.8, 130.0, 129.9, 129.6, 128.4, 126.8, 56.5, 32.2, 21.2.

ESI-HRMS:  $m/z$   $[\text{M}+\text{H}]^+$  calcd for  $\text{C}_{16}\text{H}_{16}\text{ClOS}$  291.0605, found 291.0605.

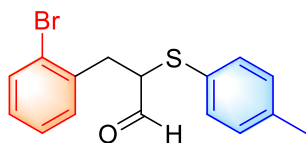

### 3-(2-bromophenyl)-2-(*p*-tolylthio)propanal (3ap)

Yellow oil, 48.4 mg, 72% yield, PE:EA=20:1.

$^1\text{H}$  NMR (400 MHz,  $\text{CDCl}_3$ )  $\delta$  9.52 (d,  $J = 2.8$  Hz, 1H), 7.55 (d,  $J = 8.0$  Hz, 1H), 7.30-7.24 (m, 4H), 7.11 (d,  $J = 8.0$  Hz, 3H), 3.91 (td,  $J = 8.0, 2.8$  Hz, 1H), 3.29 (dd,  $J = 14.4, 8.0$  Hz, 1H), 3.08 (dd,  $J = 14.4, 6.4$  Hz, 1H), 2.33 (s, 3H).  $^{13}\text{C}$  NMR (150 MHz,  $\text{CDCl}_3$ )

$\delta$  193.4, 139.0, 136.9, 134.3, 133.0, 131.9, 130.0, 129.9, 128.7, 127.5, 124.6, 56.6, 34.6, 21.2.

**ESI-HRMS:**  $m/z$   $[M+Na]^+$  calcd for  $C_{16}H_{15}BrOSNa$  356.9919, found 356.9917.

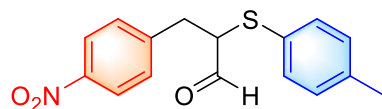

### 3-(4-nitrophenyl)-2-(*p*-tolylthio)propanal (3aq)

< 5% yield.

**ESI-HRMS:**  $m/z$   $[M+H]^+$  calcd for  $C_{16}H_{16}NO_3S$  302.0845, found 302.0847.

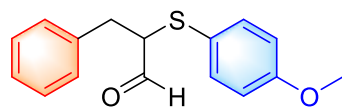

### 2-((4-methoxyphenyl)thio)-3-phenylpropanal (3ba)

Yellow oil, 43.6 mg, 80% yield, PE:EA=20:1.

**$^1H$  NMR (400 MHz,  $CDCl_3$ )**  $\delta$  9.48 (d,  $J = 3.2$  Hz, 1H), 7.34-7.29 (m, 4H), 7.26-7.21 (m, 3H), 6.85-6.82 (m, 2H), 3.79 (s, 3H), 3.70-3.66 (m, 1H), 3.14 (dd,  $J = 14.6, 8.2$  Hz, 1H), 2.93 (dd,  $J = 14.4, 6.4$  Hz, 1H).  **$^{13}C$  NMR (150 MHz,  $CDCl_3$ )**  $\delta$  193.8, 160.4, 137.5, 136.8, 132.6, 129.1, 128.6, 126.8, 120.9, 114.8, 58.8, 55.3, 34.0.

**ESI-HRMS:**  $m/z$   $[M+H]^+$  calcd for  $C_{16}H_{17}O_2S$  273.0944, found 273.0944.

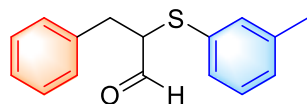

### 3-phenyl-2-(*m*-tolylthio)propanal (3bb)

Light Yellow oil, 40.0 mg, 78% yield, PE:EA=20:1.

**$^1H$  NMR (400 MHz,  $CDCl_3$ )**  $\delta$  9.48 (d,  $J = 3.6$  Hz, 1H), 7.32 (d,  $J = 7.6$  Hz, 2H), 7.28-7.25 (m, 3H), 7.20-7.18 (m, 3H), 7.12-7.10 (m, 1H), 3.82 (td,  $J = 7.2, 3.6$  Hz, 1H), 3.20 (dd,  $J = 14.4, 8.0$  Hz, 1H), 2.98 (dd,  $J = 14.4, 6.8$  Hz, 1H), 2.33 (s, 3H).  **$^{13}C$  NMR (150 MHz,  $CDCl_3$ )**  $\delta$  194.1, 139.0, 137.3, 133.8, 131.2, 130.2, 129.3, 129.1, 129.0, 128.6, 126.9, 58.0, 34.3, 21.2.

**ESI-HRMS:**  $m/z$   $[M+H]^+$  calcd for  $C_{16}H_{17}OS$  257.0995, found 257.0993.

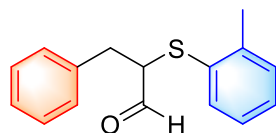

### 3-phenyl-2-(*o*-tolylthio)propanal (3bc)

Light Yellow oil, 39.6 mg, 77% yield, PE:EA=20:1.

**<sup>1</sup>H NMR (400 MHz, CDCl<sub>3</sub>)** δ 9.42 (d, *J* = 4.4 Hz, 1H), 7.35-7.30 (m, 3H), 7.27-7.23 (m, 3H), 7.21-7.19 (m, 2H), 7.16-7.11 (m, 1H), 3.81-3.77 (m, 1H), 3.24 (dd, *J* = 14.2, 8.2 Hz, 1H), 3.03 (dd, *J* = 14.2, 7.0 Hz, 1H), 2.38 (s, 3H). **<sup>13</sup>C NMR (150 MHz, CDCl<sub>3</sub>)** δ 194.1, 140.4, 137.0, 133.4, 131.3, 130.7, 129.1, 128.7, 128.4, 127.0, 126.7, 57.7, 34.5, 20.8.

**ESI-HRMS:** *m/z* [M+H]<sup>+</sup> calcd for C<sub>16</sub>H<sub>17</sub>OS 257.0995, found 257.0995.

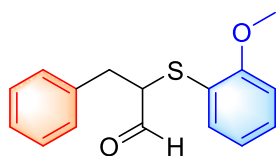

**2-((2-methoxyphenyl)thio)-3-phenylpropanal (3bd)**

Yellow oil, 43.2 mg, 79% yield, PE:EA=20:1.

**<sup>1</sup>H NMR (400 MHz, CDCl<sub>3</sub>)** δ 9.46 (d, *J* = 3.6 Hz, 1H), 7.38 (dd, *J* = 7.6, 1.6 Hz, 1H), 7.33-7.29 (m, 3H), 7.26-7.22 (m, 3H), 6.91-6.87 (m, 2H), 3.87 (s, 1H), 3.85 (s, 3H), 3.20 (dd, *J* = 14.4, 8.0 Hz, 1H), 2.95 (dd, *J* = 14.4, 6.8 Hz, 1H). **<sup>13</sup>C NMR (150 MHz, CDCl<sub>3</sub>)** δ 194.9, 159.3, 137.5, 135.4, 130.4, 129.1, 128.5, 126.8, 121.0, 119.2, 111.1, 56.4, 55.6, 34.2.

**ESI-HRMS:** *m/z* [M+H]<sup>+</sup> calcd for C<sub>16</sub>H<sub>17</sub>O<sub>2</sub>S 273.0944, found 273.0944.

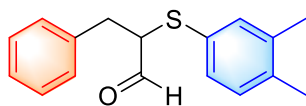

**2-((3,4-dimethylphenyl)thio)-3-phenylpropanal (3be)**

Yellow oil, 40.1 mg, 74% yield, PE:EA=20:1.

**<sup>1</sup>H NMR (400 MHz, CDCl<sub>3</sub>)** δ 9.41 (d, *J* = 4.0 Hz, 1H), 7.31 (d, *J* = 7.2 Hz, 2H), 7.25-7.22 (m, 4H), 7.04 (s, 1H), 6.94 (d, *J* = 7.6 Hz, 1H), 3.73-3.68 (m, 1H), 3.21 (dd, *J* = 14.4, 8.4 Hz, 1H), 3.01 (dd, *J* = 14.4, 6.8 Hz, 1H), 2.35 (s, 3H), 2.29 (s, 3H). **<sup>13</sup>C NMR (150 MHz, CDCl<sub>3</sub>)** δ 193.9, 140.9, 138.9, 137.2, 134.6, 131.6, 129.1, 128.6, 127.5, 127.4, 126.9, 58.2, 34.5, 21.0, 20.8.

**ESI-HRMS:** *m/z* [M+H]<sup>+</sup> calcd for C<sub>17</sub>H<sub>19</sub>OS 271.1151, found 271.1151.

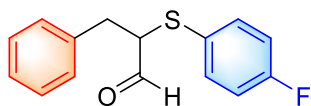

**2-((4-fluorophenyl)thio)-3-phenylpropanal (3bf)**

Yellow oil, 32.2 mg, 62% yield, PE:EA=20:1.

**<sup>1</sup>H NMR (400 MHz, CDCl<sub>3</sub>)** δ 9.47 (d, *J* = 3.6 Hz, 1H), 7.37-7.30 (m, 4H), 7.27-7.25 (m, 1H), 7.22-7.20 (m, 2H), 7.02-6.98 (m, 2H), 3.76-3.71 (m, 1H), 3.16 (dd, *J* = 14.4,

8.0 Hz, 1H), 2.95 (dd,  $J = 14.6, 7.0$  Hz, 1H).  $^{13}\text{C}$  NMR (150 MHz,  $\text{CDCl}_3$ )  $\delta$  193.6, 163.1 (d,  $J_{\text{C-F}} = 248.4$  Hz), 137.1, 136.4 (d,  $J_{\text{C-F}} = 8.4$  Hz), 129.1, 128.7, 127.0, 126.1 (d,  $J_{\text{C-F}} = 3.3$  Hz), 116.4 (d,  $J_{\text{C-F}} = 21.9$  Hz), 58.5, 34.1.  $^{19}\text{F}$  NMR (376 MHz,  $\text{CDCl}_3$ )  $\delta$  -111.71 (m).

**ESI-HRMS:**  $m/z$   $[\text{M}+\text{H}]^+$  calcd for  $\text{C}_{15}\text{H}_{14}\text{FOS}$  261.0744, found 261.0744.

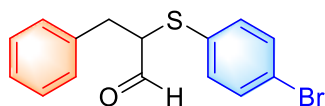

### 2-((4-bromophenyl)thio)-3-phenylpropanal (3bg)<sup>[2]</sup>

Yellow oil, 47.0 mg, 71% yield, PE:EA=20:1.

$^1\text{H}$  NMR (400 MHz,  $\text{CDCl}_3$ )  $\delta$  9.45 (d,  $J = 3.6$  Hz, 1H), 7.43-7.40 (m, 2H), 7.31 (d,  $J = 7.6$  Hz, 2H), 7.27-7.25 (m, 1H), 7.21 (d,  $J = 8.4$  Hz, 4H), 3.81-3.77 (m, 1H), 3.18 (dd,  $J = 14.4, 8.0$  Hz, 1H), 2.96 (dd,  $J = 14.4, 7.2$  Hz, 1H).  $^{13}\text{C}$  NMR (150 MHz,  $\text{CDCl}_3$ )  $\delta$  193.7, 136.8, 134.7, 132.3, 130.5, 129.1, 128.7, 127.1, 122.9, 57.9, 34.2.

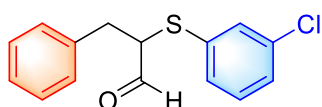

### 2-((3-chlorophenyl)thio)-3-phenylpropanal (3bh)

Yellow oil, 37.7 mg, 68% yield, PE:EA=20:1.

$^1\text{H}$  NMR (400 MHz,  $\text{CDCl}_3$ )  $\delta$  9.46 (d,  $J = 3.6$  Hz, 1H), 7.34-7.31 (m, 2H), 7.28-7.22 (m, 7H), 3.85 (td,  $J = 7.6, 3.6$  Hz, 1H), 3.21 (dd,  $J = 14.4, 8.0$  Hz, 1H), 2.99 (dd,  $J = 14.4, 7.2$  Hz, 1H).  $^{13}\text{C}$  NMR (150 MHz,  $\text{CDCl}_3$ )  $\delta$  193.8, 136.8, 134.8, 133.7, 132.3, 130.7, 130.2, 129.1, 128.7, 128.4, 127.1, 57.8, 34.3.

**ESI-HRMS:**  $m/z$   $[\text{M}+\text{H}]^+$  calcd for  $\text{C}_{15}\text{H}_{14}\text{ClOS}$  277.0448, found 277.0449.

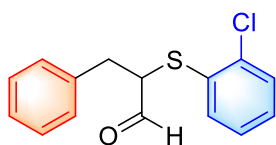

### 2-((2-chlorophenyl)thio)-3-phenylpropanal (3bi)

Yellow oil, 35.9 mg, 65% yield, PE:EA=20:1.

$^1\text{H}$  NMR (400 MHz,  $\text{CDCl}_3$ )  $\delta$  9.42 (d,  $J = 4.4$  Hz, 1H), 7.43-7.38 (m, 2H), 7.34-7.30 (m, 2H), 7.27-7.19 (m, 5H), 3.97-3.92 (m, 1H), 3.24 (dd,  $J = 14.2, 8.6$  Hz, 1H), 3.09 (dd,  $J = 14.4, 6.8$  Hz, 1H).  $^{13}\text{C}$  NMR (150 MHz,  $\text{CDCl}_3$ )  $\delta$  194.1, 136.7, 136.6, 133.7, 131.4, 130.2, 129.3, 129.1, 128.7, 127.4, 127.1, 56.7, 34.5.

**ESI-HRMS:**  $m/z$   $[\text{M}+\text{H}]^+$  calcd for  $\text{C}_{15}\text{H}_{14}\text{ClOS}$  277.0448, found 277.0448.

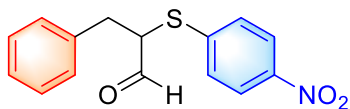

**2-((4-nitrophenyl)thio)-3-phenylpropanal (3bj)**

< 5% yield.

**ESI-HRMS:**  $m/z$   $[M+H]^+$  calcd for  $C_{15}H_{14}NO_3S$  288.0689, found 288.0688.

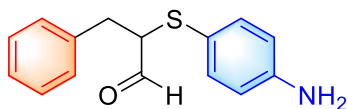

**2-((4-aminophenyl)thio)-3-phenylpropanal (3bk)**

< 5% yield.

**ESI-HRMS:**  $m/z$   $[M+H]^+$  calcd for  $C_{15}H_{16}NOS$  258.0947, found 258.0947.

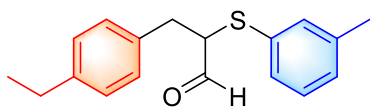

**3-(4-ethylphenyl)-2-(*m*-tolylthio)propanal (3ca)**

Yellow oil, 43.7 mg, 77% yield, PE:EA=20:1.

**$^1H$  NMR (400 MHz,  $CDCl_3$ )**  $\delta$  9.46 (d,  $J = 3.6$  Hz, 1H), 7.19-7.18 (m, 8H), 3.83-3.78 (m, 1H), 3.16 (dd,  $J = 14.4, 8.0$  Hz, 1H), 2.96 (dd,  $J = 14.6, 6.6$  Hz, 1H), 2.64 (dd,  $J = 15.2, 7.6$  Hz, 2H), 2.32 (s, 3H), 1.24 (t,  $J = 7.6$  Hz, 3H).  **$^{13}C$  NMR (150 MHz,  $CDCl_3$ )**  $\delta$  194.3, 142.9, 139.0, 134.3, 133.7, 131.3, 130.1, 129.2, 129.0, 129.0, 128.1, 58.0, 33.9, 28.5, 21.2, 15.5.

**ESI-HRMS:**  $m/z$   $[M+H]^+$  calcd for  $C_{18}H_{21}OS$  285.1308, found 285.1305.

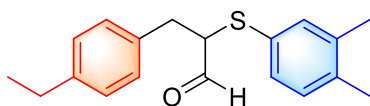

**2-((3,4-dimethylphenyl)thio)-3-(4-ethylphenyl)propanal (3cb)**

Yellow oil, 41.9 mg, 70% yield, PE:EA=20:1.

**$^1H$  NMR (400 MHz,  $CDCl_3$ )**  $\delta$  9.39-9.37 (m, 1H), 7.26-7.22 (m, 1H), 7.13 (s, 4H), 7.02 (s, 1H), 6.93 (d,  $J = 7.6$  Hz, 1H), 3.71-3.66 (m, 1H), 3.16 (dd,  $J = 14.4, 8.4$  Hz, 1H), 2.98 (dd,  $J = 14.4, 6.4$  Hz, 1H), 2.62 (dd,  $J = 15.2, 7.6$  Hz, 2H), 2.35 (s, 3H), 2.28 (s, 3H), 1.24-1.20 (m, 3H).  **$^{13}C$  NMR (150 MHz,  $CDCl_3$ )**  $\delta$  194.1, 142.9, 140.8, 138.8, 134.5, 134.3, 131.5, 129.0, 128.1, 127.4, 58.1, 34.1, 28.4, 21.0, 20.8, 15.5.

**ESI-HRMS:**  $m/z$   $[M+H]^+$  calcd for  $C_{19}H_{23}OS$  299.1464, found 299.1464.

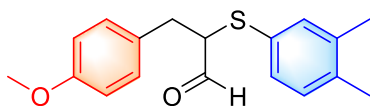

**2-((3,4-dimethylphenyl)thio)-3-(4-methoxyphenyl)propanal (3cc)**

Yellow oil, 43.9 mg, 73% yield, PE:EA=20:1.

**<sup>1</sup>H NMR (400 MHz, CDCl<sub>3</sub>)** δ 9.38 (d, *J* = 4.0 Hz, 1H), 7.26-7.23 (m, 1H), 7.15-7.13 (m, 2H), 7.03-7.02 (m, 1H), 6.95-6.92 (m, 1H), 6.85-6.83 (m, 2H), 3.79 (s, 3H), 3.69-3.64 (m, 1H), 3.13 (dd, *J* = 14.4, 8.4 Hz, 1H), 2.95 (dd, *J* = 14.4, 6.8 Hz, 1H), 2.35 (s, 3H), 2.28 (s, 3H). **<sup>13</sup>C NMR (150 MHz, CDCl<sub>3</sub>)** δ 194.2, 158.5, 140.8, 138.8, 134.5, 131.6, 130.1, 129.1, 127.5, 127.4, 114.0, 58.3, 55.2, 33.7, 21.0, 20.8.

**ESI-HRMS:** *m/z* [M+H]<sup>+</sup> calcd for C<sub>18</sub>H<sub>20</sub>O<sub>2</sub>SK 339.0816, found 339.0816.

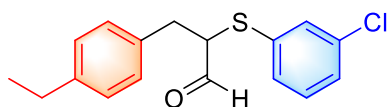

### 2-((3-chlorophenyl)thio)-3-(4-ethylphenyl)propanal (3cd)

Yellow oil, 41.8 mg, 69% yield, PE:EA=20:1.

**<sup>1</sup>H NMR (400 MHz, CDCl<sub>3</sub>)** δ 9.45 (d, *J* = 3.6 Hz, 1H), 7.34-7.33 (m, 1H), 7.25-7.21 (m, 2H), 7.18-7.13 (m, 5H), 3.86-3.82 (m, 1H), 3.18 (dd, *J* = 14.2, 8.2 Hz, 1H), 2.97 (dd, *J* = 14.4, 6.8 Hz, 1H), 2.64 (dd, *J* = 15.2, 7.6 Hz, 2H), 1.24 (t, *J* = 7.6 Hz, 3H). **<sup>13</sup>C NMR (150 MHz, CDCl<sub>3</sub>)** δ 194.0, 143.1, 134.7, 133.9, 133.8, 132.2, 130.5, 130.1, 129.0, 128.3, 128.2, 57.8, 33.9, 28.5, 15.5.

**ESI-HRMS:** *m/z* [M+H]<sup>+</sup> calcd for C<sub>17</sub>H<sub>18</sub>ClOS 305.0761, found 305.0768.

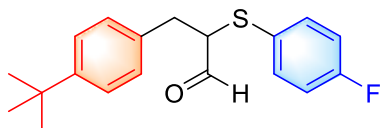

### 3-(4-(*tert*-butyl)phenyl)-2-((4-fluorophenyl)thio)propanal (3ce)

Yellow oil, 40.0 mg, 63% yield, PE:EA=20:1.

**<sup>1</sup>H NMR (600 MHz, CDCl<sub>3</sub>)** δ 9.45 (d, *J* = 3.6 Hz, 1H), 7.36-7.31 (m, 4H), 7.13 (d, *J* = 8.4 Hz, 2H), 7.00-6.97 (m, 2H), 3.74-3.71 (m, 1H), 3.12 (dd, *J* = 14.4, 8.4 Hz, 1H), 2.92 (dd, *J* = 14.4, 6.6 Hz, 1H), 1.30 (s, 9H). **<sup>13</sup>C NMR (150 MHz, CDCl<sub>3</sub>)** δ 193.8, 163.1 (d, *J*<sub>C-F</sub> = 248.3 Hz), 149.9, 136.3 (d, *J*<sub>C-F</sub> = 8.4 Hz), 133.9, 128.7, 126.2 (d, *J*<sub>C-F</sub> = 3.3 Hz), 125.6, 116.4 (d, *J*<sub>C-F</sub> = 21.9 Hz), 58.5, 34.4, 33.7, 31.3. **<sup>19</sup>F NMR (376 MHz, CDCl<sub>3</sub>)** δ -111.91 (m).

**ESI-HRMS:** *m/z* [M+H]<sup>+</sup> calcd for C<sub>19</sub>H<sub>22</sub>FOS 317.1370, found 317.1368.

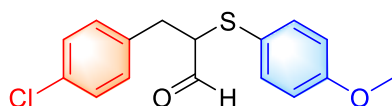

### 3-(4-chlorophenyl)-2-((4-methoxyphenyl)thio)propanal (3cf)

Yellow oil, 39.2 mg, 64% yield, PE:EA=20:1.



**<sup>1</sup>H NMR (400 MHz, CDCl<sub>3</sub>)** δ 9.49 (d, *J* = 2.8 Hz, 1H), 7.32-7.26 (m, 4H), 7.15-7.13 (m, 2H), 6.84-6.82 (m, 2H), 3.79 (s, 3H), 3.64-3.60 (m, 1H), 3.09 (dd, *J* = 14.4, 8.0 Hz, 1H), 2.87 (dd, *J* = 14.4, 6.8 Hz, 1H). **<sup>13</sup>C NMR (150 MHz, CDCl<sub>3</sub>)** δ 193.5, 160.5, 136.9, 136.0, 132.7, 130.5, 128.7, 120.5, 114.8, 58.6, 55.3, 33.2.

**ESI-HRMS:** *m/z* [M+H]<sup>+</sup> calcd for C<sub>16</sub>H<sub>16</sub>ClO<sub>2</sub>S 307.0554, found 307.0553.

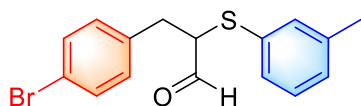

### 3-(4-bromophenyl)-2-(*m*-tolylthio)propanal (3cg)

Yellow oil, 43.7 mg, 65% yield, PE:EA=20:1.

**<sup>1</sup>H NMR (400 MHz, CDCl<sub>3</sub>)** δ 9.49 (d, *J* = 2.8 Hz, 1H), 7.44-7.42 (m, 2H), 7.18-7.16 (m, 3H), 7.12-7.09 (m, 3H), 3.75 (td, *J* = 7.2, 2.8 Hz, 1H), 3.15 (dd, *J* = 14.4, 7.6 Hz, 1H), 2.90 (dd, *J* = 14.4, 7.2 Hz, 1H), 2.32 (s, 3H). **<sup>13</sup>C NMR (150 MHz, CDCl<sub>3</sub>)** δ 193.9, 139.1, 136.4, 134.0, 131.7, 130.9, 130.8, 130.5, 129.5, 129.1, 120.8, 57.9, 33.6, 21.2.

**ESI-HRMS:** *m/z* [M+ Na]<sup>+</sup> calcd for C<sub>16</sub>H<sub>15</sub>BrOSNa 356.9919, found 356.9921.

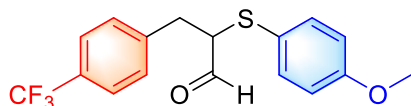

### 2-((4-methoxyphenyl)thio)-3-(4-(trifluoromethyl)phenyl)propanal (3ch)

Yellow oil, 40.6 mg, 60% yield, PE:EA=20:1.

**<sup>1</sup>H NMR (600 MHz, CDCl<sub>3</sub>)** δ 9.52 (d, *J* = 2.4 Hz, 1H), 7.55 (d, *J* = 7.8 Hz, 2H), 7.33-7.29 (m, 4H), 6.83 (d, *J* = 8.4 Hz, 2H), 3.79 (s, 3H), 3.66 (td, *J* = 7.2, 1.8 Hz, 1H), 3.18 (dd, *J* = 14.4, 7.8 Hz, 1H), 2.94 (dd, *J* = 14.7, 6.9 Hz, 1H). **<sup>13</sup>C NMR (150 MHz, CDCl<sub>3</sub>)** δ 193.2, 160.6, 141.8 (d, *J*<sub>C-F</sub> = 0.9 Hz), 137.0, 132.6, 129.5, 125.5 (dd, *J*<sub>C-F</sub> = 7.4, 3.7 Hz), 124.1 (d, *J*<sub>C-F</sub> = 270.6 Hz), 120.3, 114.9, 58.3, 55.3, 33.6. **<sup>19</sup>F NMR (376 MHz, CDCl<sub>3</sub>)** δ -62.49 (s).

**ESI-HRMS:** *m/z* [M+H]<sup>+</sup> calcd for C<sub>17</sub>H<sub>16</sub>F<sub>3</sub>O<sub>2</sub>S 341.0818, found 341.0818.

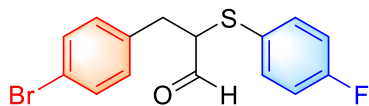

### 3-(4-bromophenyl)-2-((4-fluorophenyl)thio)propanal (3ci)

Yellow oil, 41.3 mg, 61% yield, PE:EA=20:1.

**<sup>1</sup>H NMR (400 MHz, CDCl<sub>3</sub>)** δ 9.48 (d, *J* = 2.8 Hz, 1H), 7.43 (d, *J* = 8.0 Hz, 2H), 7.36-7.33 (m, 2H), 7.08 (d, *J* = 8.0 Hz, 2H), 7.02-6.98 (m, 2H), 3.70-3.66 (m, 1H), 3.10 (dd, *J* = 14.6, 7.8 Hz, 1H), 2.87 (dd, *J* = 14.4, 6.8 Hz, 1H). **<sup>13</sup>C NMR (150 MHz, CDCl<sub>3</sub>)** δ 193.3, 163.2 (d, *J*<sub>C-F</sub> = 248.7 Hz), 136.6 (d, *J*<sub>C-F</sub> = 8.6 Hz), 136.1, 131.7, 130.8, 125.6

(d,  $J_{C-F} = 3.5$  Hz), 120.9, 116.5 (d,  $J_{C-F} = 21.9$  Hz), 58.2 (d,  $J_{C-F} = 0.6$  Hz), 33.4.  $^{19}\text{F}$  NMR (376 MHz,  $\text{CDCl}_3$ )  $\delta$  -111.38 (m).

ESI-HRMS:  $m/z$   $[\text{M}+\text{H}]^+$  calcd for  $\text{C}_{15}\text{H}_{13}\text{BrFOS}$  338.9849, found 338.9849.

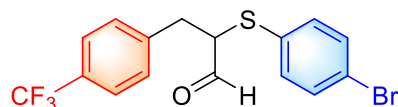

### 2-((4-bromophenyl)thio)-3-(4-(trifluoromethyl)phenyl)propanal (3cj)

Yellow oil, 45.4 mg, 58% yield, PE:EA=20:1.

$^1\text{H}$  NMR (400 MHz,  $\text{CDCl}_3$ )  $\delta$  9.50 (d,  $J = 2.4$  Hz, 1H), 7.57 (d,  $J = 8.0$  Hz, 2H), 7.43 (d,  $J = 7.6$  Hz, 2H), 7.33 (d,  $J = 7.6$  Hz, 2H), 7.21 (d,  $J = 8.0$  Hz, 2H), 3.80-3.76 (m, 1H), 3.24 (dd,  $J = 14.4, 7.6$  Hz, 1H), 2.98 (dd,  $J = 14.4, 7.2$  Hz, 1H).  $^{13}\text{C}$  NMR (150 MHz,  $\text{CDCl}_3$ )  $\delta$  193.1, 141.1 (d,  $J_{C-F} = 1.7$  Hz), 135.1, 132.5, 132.3 (d,  $J_{C-F} = 19.7$  Hz), 131.1 (d,  $J_{C-F} = 6.9$  Hz), 129.8, 129.5, 125.6 (dd,  $J_{C-F} = 7.2, 3.6$  Hz), 123.3, 57.6, 33.8.  $^{19}\text{F}$  NMR (376 MHz,  $\text{CDCl}_3$ )  $\delta$  -62.50 (s).

ESI-HRMS:  $m/z$   $[\text{M}+\text{H}]^+$  calcd for  $\text{C}_{16}\text{H}_{13}\text{BrF}_3\text{OS}$  388.9817, found 388.9818.

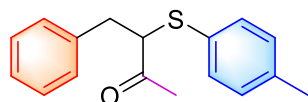

### 4-phenyl-3-(p-tolylthio)butan-2-one (3da)

Yellow oil, 41.9 mg, 78% yield, PE:EA=20:1.

$^1\text{H}$  NMR (600 MHz,  $\text{CDCl}_3$ )  $\delta$  7.29-7.21 (m, 5H), 7.18 (d,  $J = 7.2$  Hz, 2H), 7.10 (d,  $J = 7.8$  Hz, 2H), 3.83 (t,  $J = 7.8$  Hz, 1H), 3.14 (dd,  $J = 14.1, 8.7$  Hz, 1H), 2.97 (dd,  $J = 14.1, 6.3$  Hz, 1H), 2.33 (s, 3H), 2.20 (s, 3H).  $^{13}\text{C}$  NMR (150 MHz,  $\text{CDCl}_3$ )  $\delta$  204.1, 138.7, 138.2, 133.8, 129.9, 129.1, 128.5, 127.7, 126.7, 58.9, 36.5, 27.9, 21.2.

ESI-HRMS:  $m/z$   $[\text{M}+\text{H}]^+$  calcd for  $\text{C}_{17}\text{H}_{19}\text{OS}$  271.1151, found 271.1151.

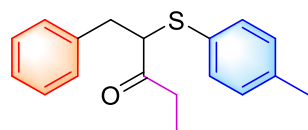

### 1-phenyl-2-(p-tolylthio)pentan-3-one (3db)

Yellow oil, 42.5 mg, 75% yield, PE:EA=20:1.

$^1\text{H}$  NMR (400 MHz,  $\text{CDCl}_3$ )  $\delta$  7.29-7.20 (m, 5H), 7.16 (d,  $J = 6.8$  Hz, 2H), 7.11 (d,  $J = 8.4$  Hz, 2H), 3.85-3.82 (m, 1H), 3.16 (dd,  $J = 14.0, 8.8$  Hz, 1H), 2.97 (dd,  $J = 14.0, 6.4$  Hz, 1H), 2.74-2.59 (m, 2H), 2.33 (s, 3H), 0.96 (t,  $J = 7.6$  Hz, 3H).  $^{13}\text{C}$  NMR (150 MHz,  $\text{CDCl}_3$ )  $\delta$  206.8, 138.7, 138.4, 133.9, 129.9, 129.1, 128.8, 128.5, 126.6, 57.4, 36.8, 34.3, 21.2, 7.9.

ESI-HRMS:  $m/z$   $[\text{M}+\text{H}]^+$  calcd for  $\text{C}_{18}\text{H}_{21}\text{OS}$  285.1308, found 285.1309.

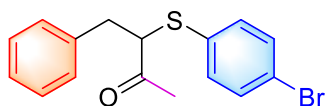

### 3-((4-bromophenyl)thio)-4-phenylbutan-2-one (3dc)<sup>[2]</sup>

Yellow oil, 47.1 mg, 70% yield, PE:EA=20:1.

<sup>1</sup>H NMR (400 MHz, CDCl<sub>3</sub>) δ 7.39-7.34 (m, 3H), 7.28-7.23 (m, 2H), 7.17-7.15 (m, 4H), 3.84 (t, *J* = 7.2 Hz, 1H), 3.13 (dd, *J* = 14.2, 8.2 Hz, 1H), 2.94 (dd, *J* = 14.2, 7.0 Hz, 1H), 2.18 (s, 3H). <sup>13</sup>C NMR (150 MHz, CDCl<sub>3</sub>) δ 203.8, 137.7, 134.5, 132.2, 130.9, 129.0, 128.6, 126.9, 122.7, 58.6, 36.5, 27.7.

ESI-HRMS: *m/z* [M+ Na]<sup>+</sup> calcd for C<sub>16</sub>H<sub>15</sub>BrOSNa 356.9919, found 356.9919.

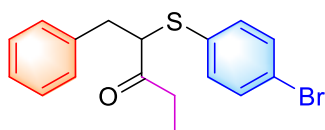

### 2-((4-bromophenyl)thio)-1-phenylpentan-3-one (3dd)

Yellow oil, 47.0 mg, 67% yield, PE:EA=20:1.

<sup>1</sup>H NMR (400 MHz, CDCl<sub>3</sub>) δ 7.42-7.38 (m, 3H), 7.29-7.26 (m, 2H), 7.19-7.14 (m, 4H), 3.86 (dd, *J* = 8.4, 6.8 Hz, 1H), 3.16 (dd, *J* = 14.0, 8.8 Hz, 1H), 2.96 (dd, *J* = 14.0, 6.8 Hz, 1H), 2.72-2.59 (m, 1H), 2.39-2.29 (m, 1H), 0.97 (t, *J* = 7.6 Hz, 3H). <sup>13</sup>C NMR (150 MHz, CDCl<sub>3</sub>) δ 206.6, 137.9, 134.8, 133.0, 132.2, 129.1, 128.6, 126.8, 122.7, 57.7, 36.8, 34.1, 7.9.

ESI-HRMS: *m/z* [M+ Na]<sup>+</sup> calcd for C<sub>17</sub>H<sub>17</sub>BrOSNa 371.0076, found 371.0076.

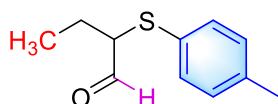

### 2-(*p*-tolylthio)butanal (3de)

Light Yellow oil, 22.5 mg, 58% yield, PE:EA=20:1.

<sup>1</sup>H NMR (600 MHz, CDCl<sub>3</sub>) δ 9.38 (d, *J* = 3.6 Hz, 1H), 7.29-7.27 (m, 2H), 7.10 (d, *J* = 7.8 Hz, 2H), 3.36 (td, *J* = 7.2, 4.2 Hz, 1H), 2.31 (s, 3H), 1.85-1.80 (m, 1H), 1.70-1.65 (m, 1H), 1.08 (t, *J* = 7.2 Hz, 3H). <sup>13</sup>C NMR (150 MHz, CDCl<sub>3</sub>) δ 195.2, 138.6, 133.7, 129.9, 127.7, 59.0, 21.2, 21.1, 11.6.

ESI-HRMS: *m/z* [M+H]<sup>+</sup> calcd for C<sub>11</sub>H<sub>15</sub>OS 195.0838, found 195.0838.

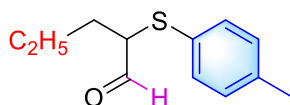

### 2-(*p*-tolylthio)pentanal (3df)

Light Yellow oil, 22.1 mg, 53% yield, PE:EA=20:1.

**<sup>1</sup>H NMR (600 MHz, CDCl<sub>3</sub>)** δ 9.36 (d, *J* = 4.2 Hz, 1H), 7.28-7.26 (m, 2H), 7.10-7.08 (m, 2H), 3.44 (td, *J* = 7.2, 4.2 Hz, 1H), 2.31 (s, 3H), 1.84-1.68 (m, 2H), 1.61-1.45 (m, 2H), 0.95 (t, *J* = 7.2 Hz, 3H). **<sup>13</sup>C NMR (150 MHz, CDCl<sub>3</sub>)** δ 195.2, 138.6, 133.6, 132.5, 129.9, 57.0, 29.7, 21.1, 20.2, 13.7.

**ESI-HRMS:** *m/z* [M+H]<sup>+</sup> calcd for C<sub>12</sub>H<sub>17</sub>OS 209.0995, found 209.0995.

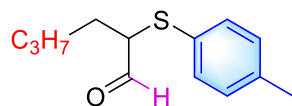

### 2-(*p*-tolylthio)hexanal (3dg)

Light Yellow oil, 23.1 mg, 52% yield, PE:EA=20:1.

**<sup>1</sup>H NMR (400 MHz, CDCl<sub>3</sub>)** δ 9.36 (d, *J* = 4.4 Hz, 1H), 7.28 (d, *J* = 8.0 Hz, 2H), 7.10 (d, *J* = 7.6 Hz, 2H), 3.43 (td, *J* = 7.2, 4.4 Hz, 1H), 2.32 (s, 3H), 1.81-1.74 (m, 1H), 1.67-1.61 (m, 1H), 1.57-1.48 (m, 2H), 1.38-1.35 (m, 2H), 0.92 (t, *J* = 6.8 Hz, 3H). **<sup>13</sup>C NMR (150 MHz, CDCl<sub>3</sub>)** δ 195.2, 138.5, 133.6, 129.9, 127.8, 57.3, 29.0, 27.4, 22.4, 21.1, 13.8.

**ESI-HRMS:** *m/z* [M+H]<sup>+</sup> calcd for C<sub>13</sub>H<sub>19</sub>OS 223.1151, found 223.1151.

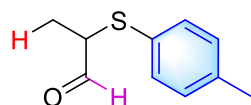

### 2-(*p*-tolylthio)propanal (3dh)

Light Yellow oil, 18.1 mg, 50% yield, PE:EA=20:1.

**<sup>1</sup>H NMR (400 MHz, CDCl<sub>3</sub>)** δ 9.75 (d, *J* = 1.2 Hz, 1H), 7.28-7.26 (m, 2H), 7.12 (d, *J* = 8.0 Hz, 2H), 3.13 (t, *J* = 7.2 Hz, 1H), 2.73 (td, *J* = 7.2, 1.2 Hz, 3H), 2.32 (s, 3H). **<sup>13</sup>C NMR (150 MHz, CDCl<sub>3</sub>)** δ 200.4, 137.0, 131.1, 131.0, 129.9, 43.3, 27.2, 21.0.

**ESI-HRMS:** *m/z* [M+H]<sup>+</sup> calcd for C<sub>10</sub>H<sub>13</sub>OS 181.0682, found 181.0682.

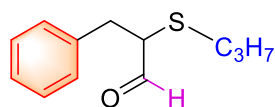

### 3-phenyl-2-(propylthio)propanal (3di)

< 5% yield.

**ESI-HRMS:** *m/z* [M+H]<sup>+</sup> calcd for C<sub>12</sub>H<sub>17</sub>OS 209.0995, found 209.0993.

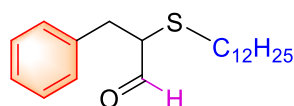

### 2-(dodecylthio)-3-phenylpropanal (3dj)

< 5% yield.

**ESI-HRMS:** *m/z* [M+H]<sup>+</sup> calcd for C<sub>21</sub>H<sub>35</sub>OS 335.2403, found 335.2403.

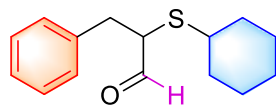

**2-(cyclohexylthio)-3-phenylpropanal (3dk)**

< 5% yield.

**ESI-HRMS:**  $m/z$   $[M+H]^+$  calcd for  $C_{15}H_{21}OS$  249.1308, found 249.1308.

## References

- [1] N. Cabrera-Lobera, M. T. Quirós, W. W. Brennessel, M. L. Neidig, E. Buñuel, D. J. Cárdenas, *Org. Lett.*, 2019, **21**, 6552–6556.
- [2] S. Biswas, C. Dahlstrand, R. A. Watile, M. Kalek, F. Himo, J. S. M. Samec, *Chem. Eur. J.*, 2013, **19**, 17939-17950.

# NMR and HRMS Spectra Copies of Products

## 3-phenyl-2-(*p*-tolylthio)propanal (3aa)

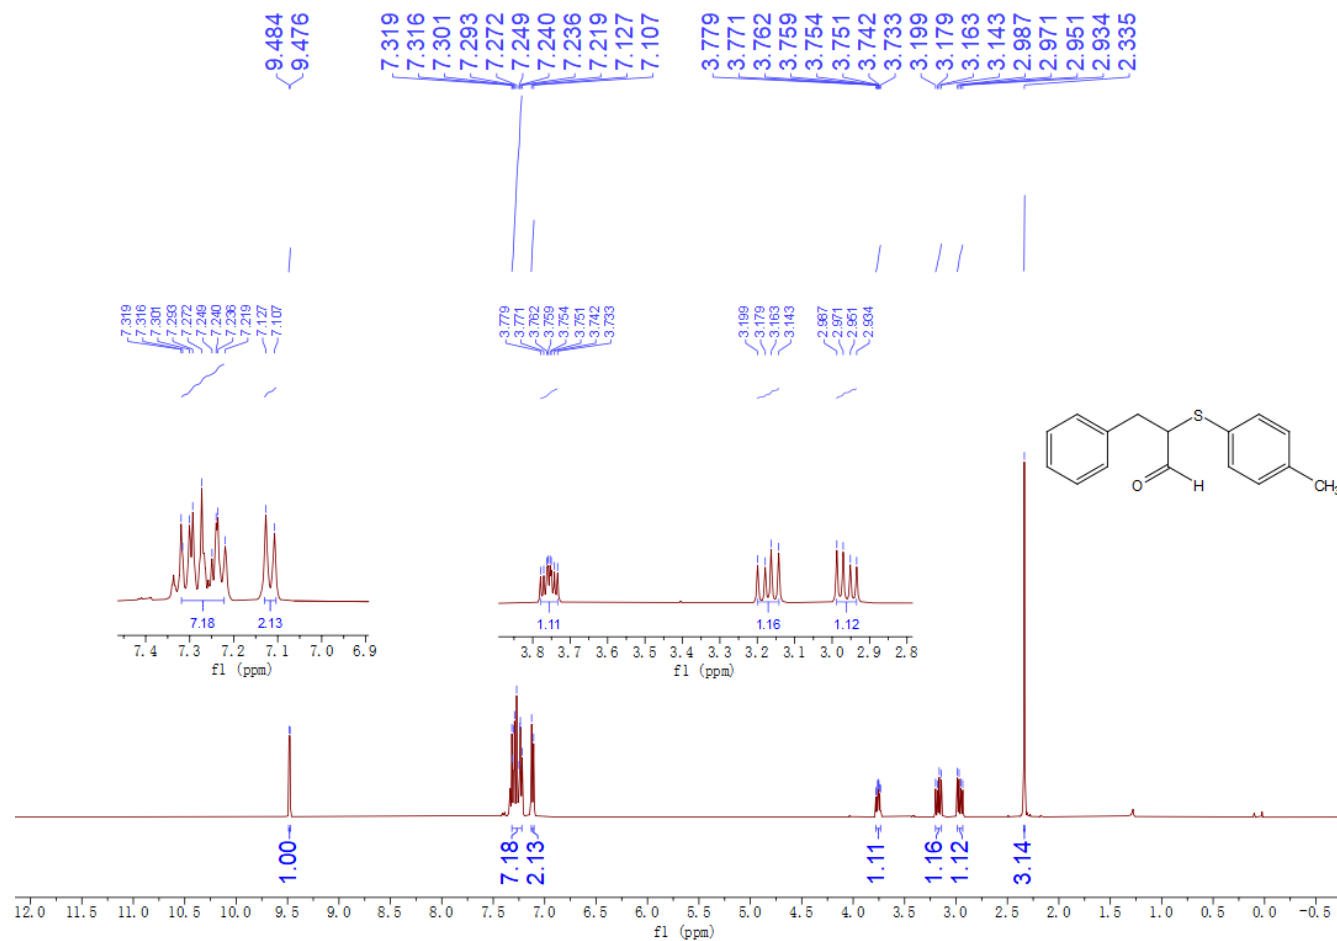

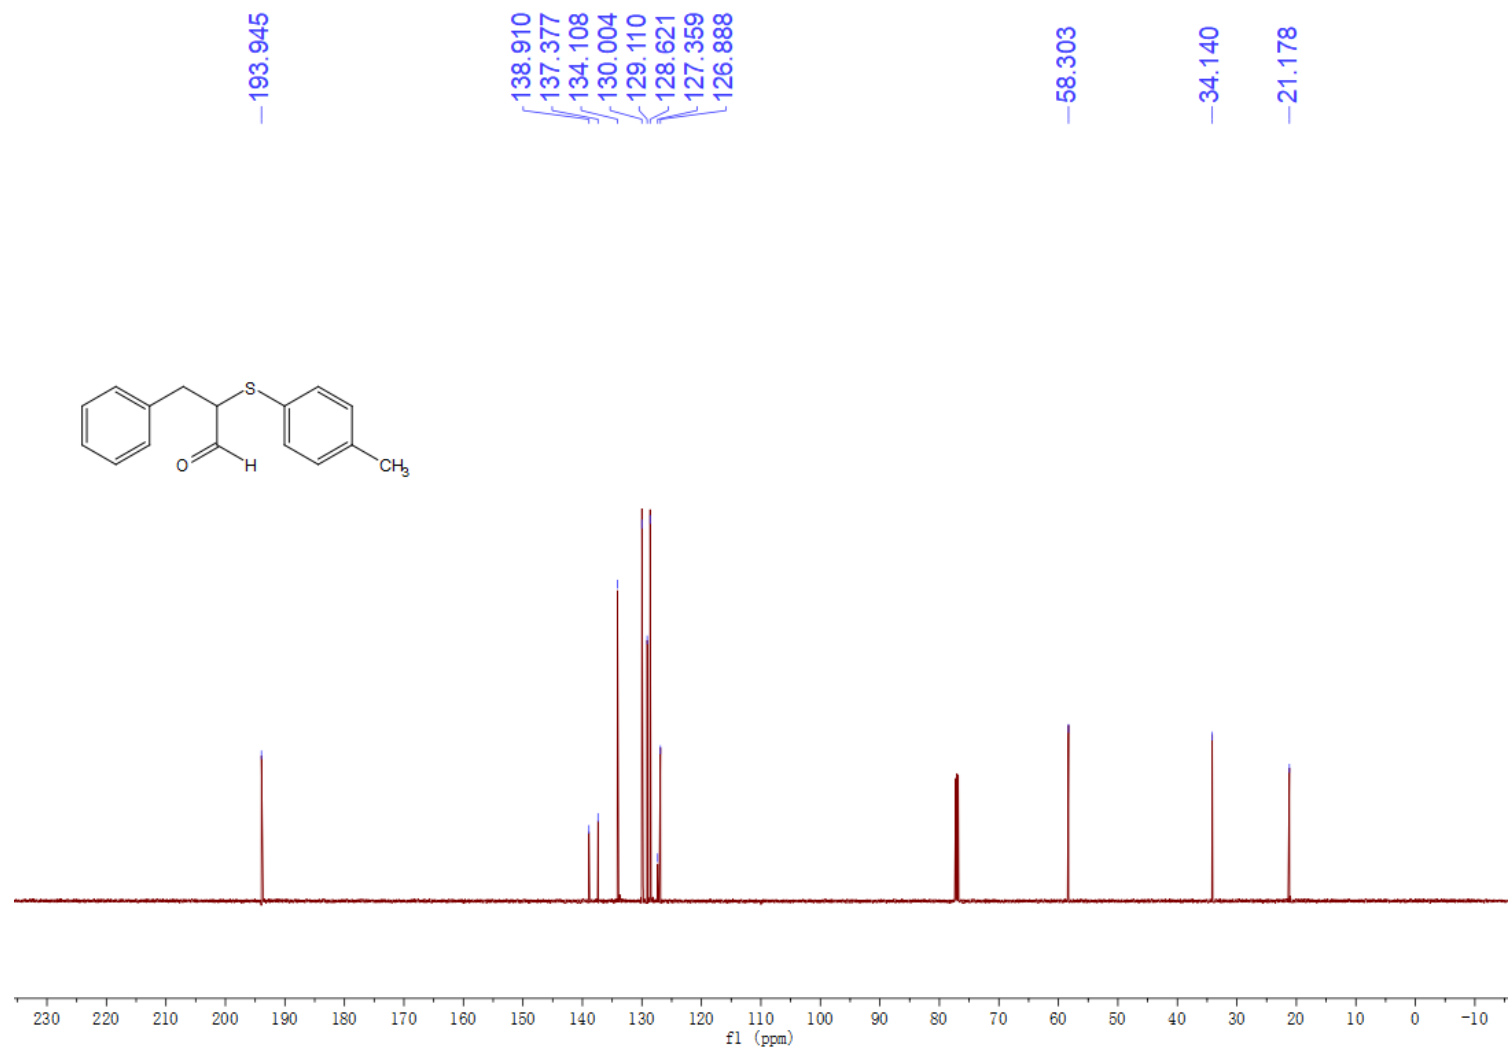



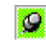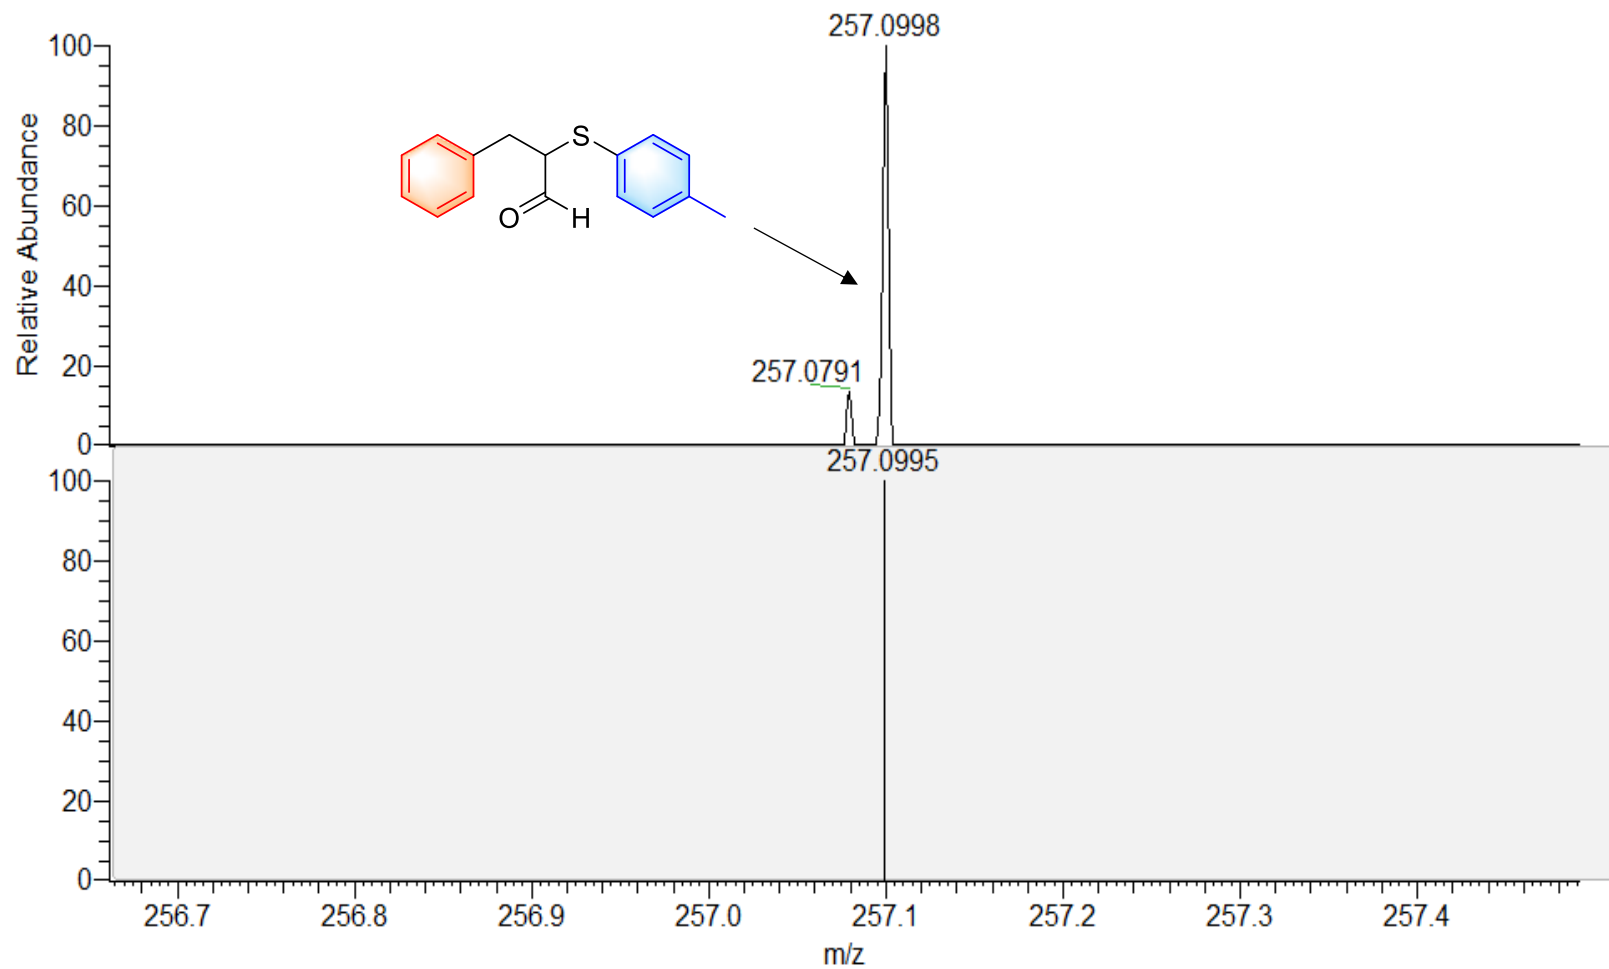

NL:  
3.54E6  
DZHY-MOUDAN-  
M6#1 RT: 0.00 AV:  
1 T: FTMS + p ESI  
Full lock ms  
[50.0000-500.3000]

NL:  
7.96E5  
C<sub>16</sub> H<sub>16</sub> OS +H:  
C<sub>16</sub> H<sub>17</sub> O<sub>1</sub> S<sub>1</sub>  
pa Chrg 1

**3-(*p*-tolyl)-2-(*p*-tolylthio)propanal (3ab)**

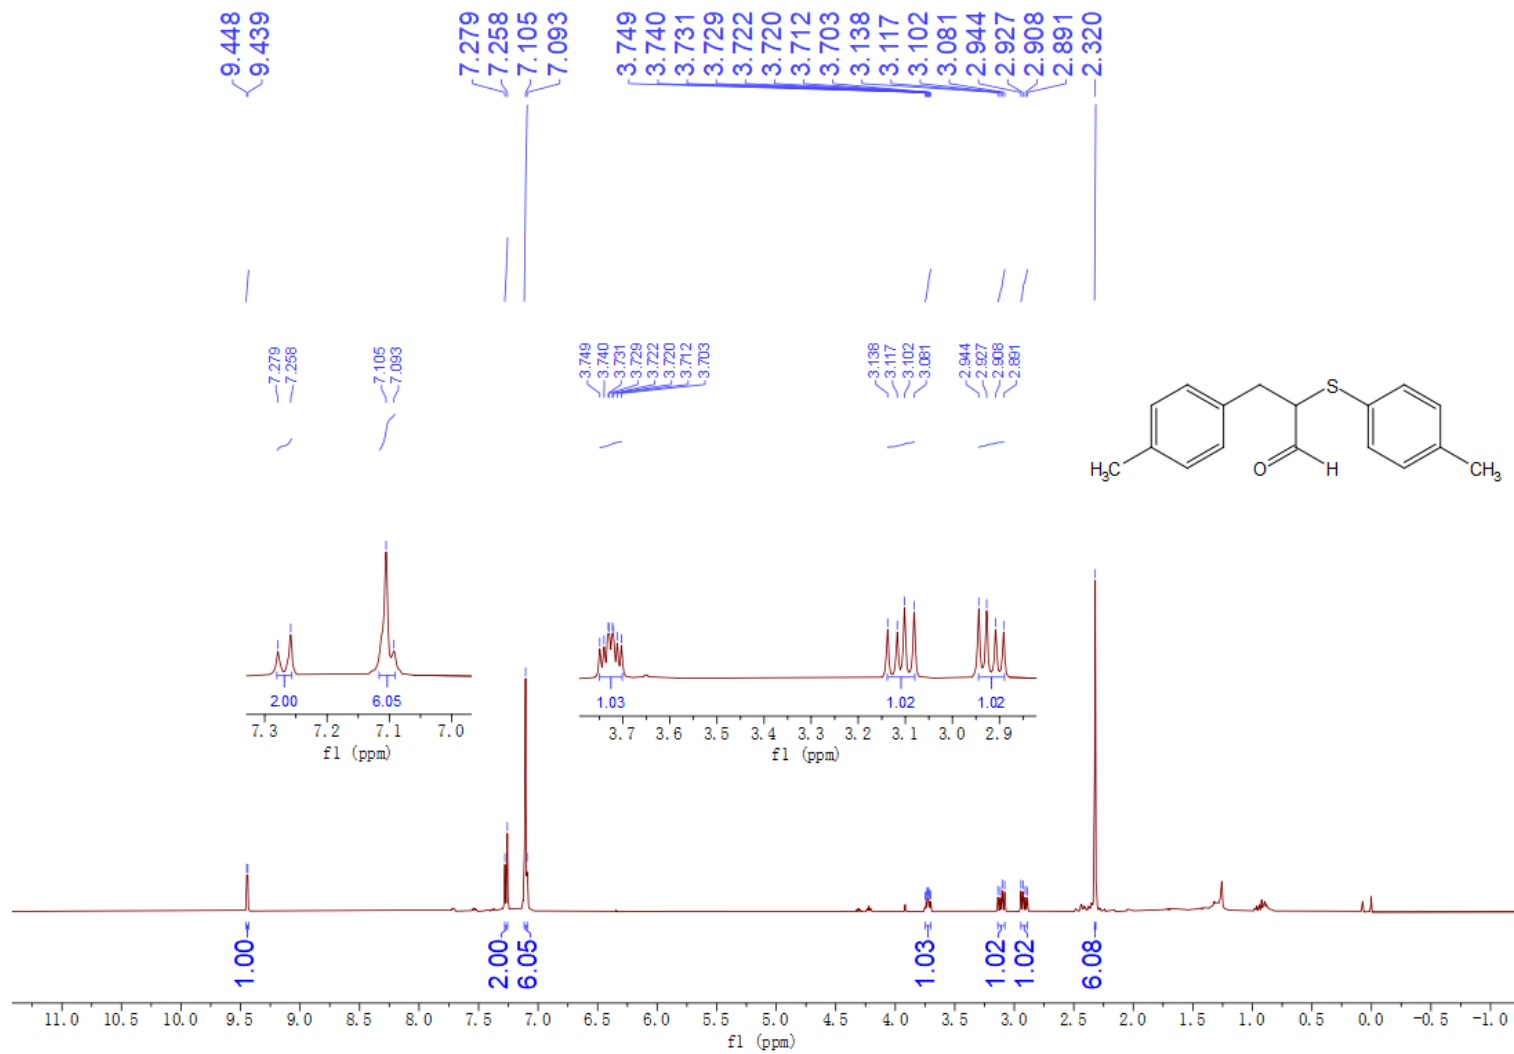

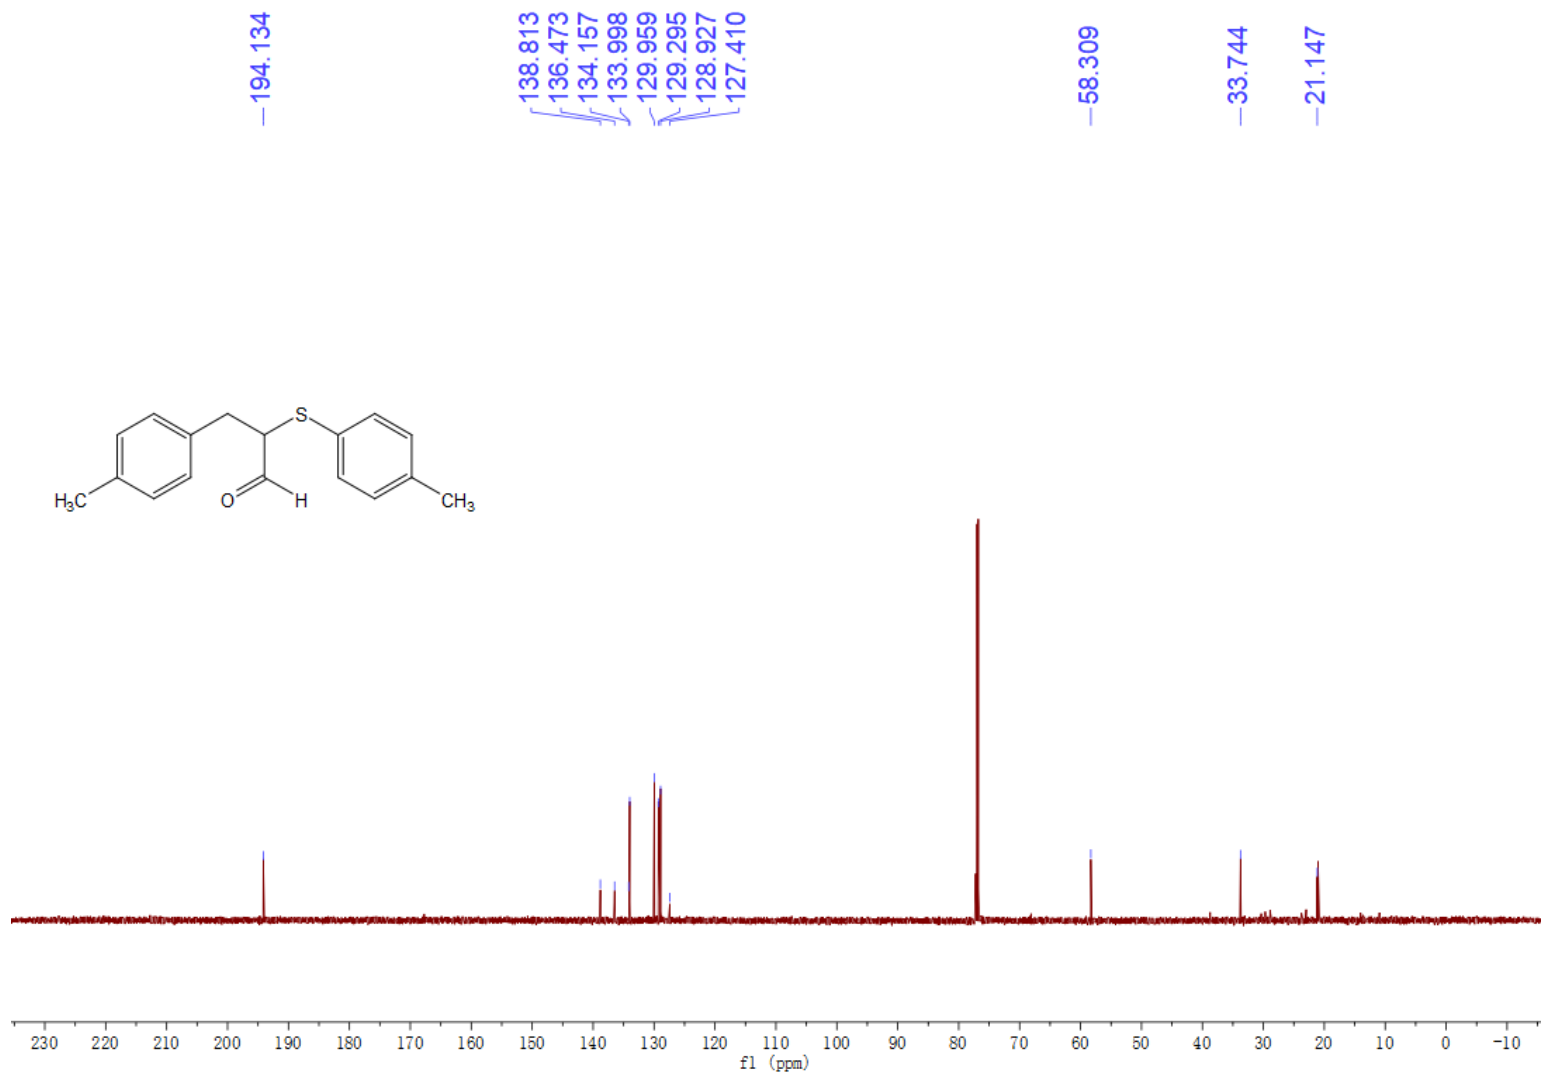

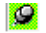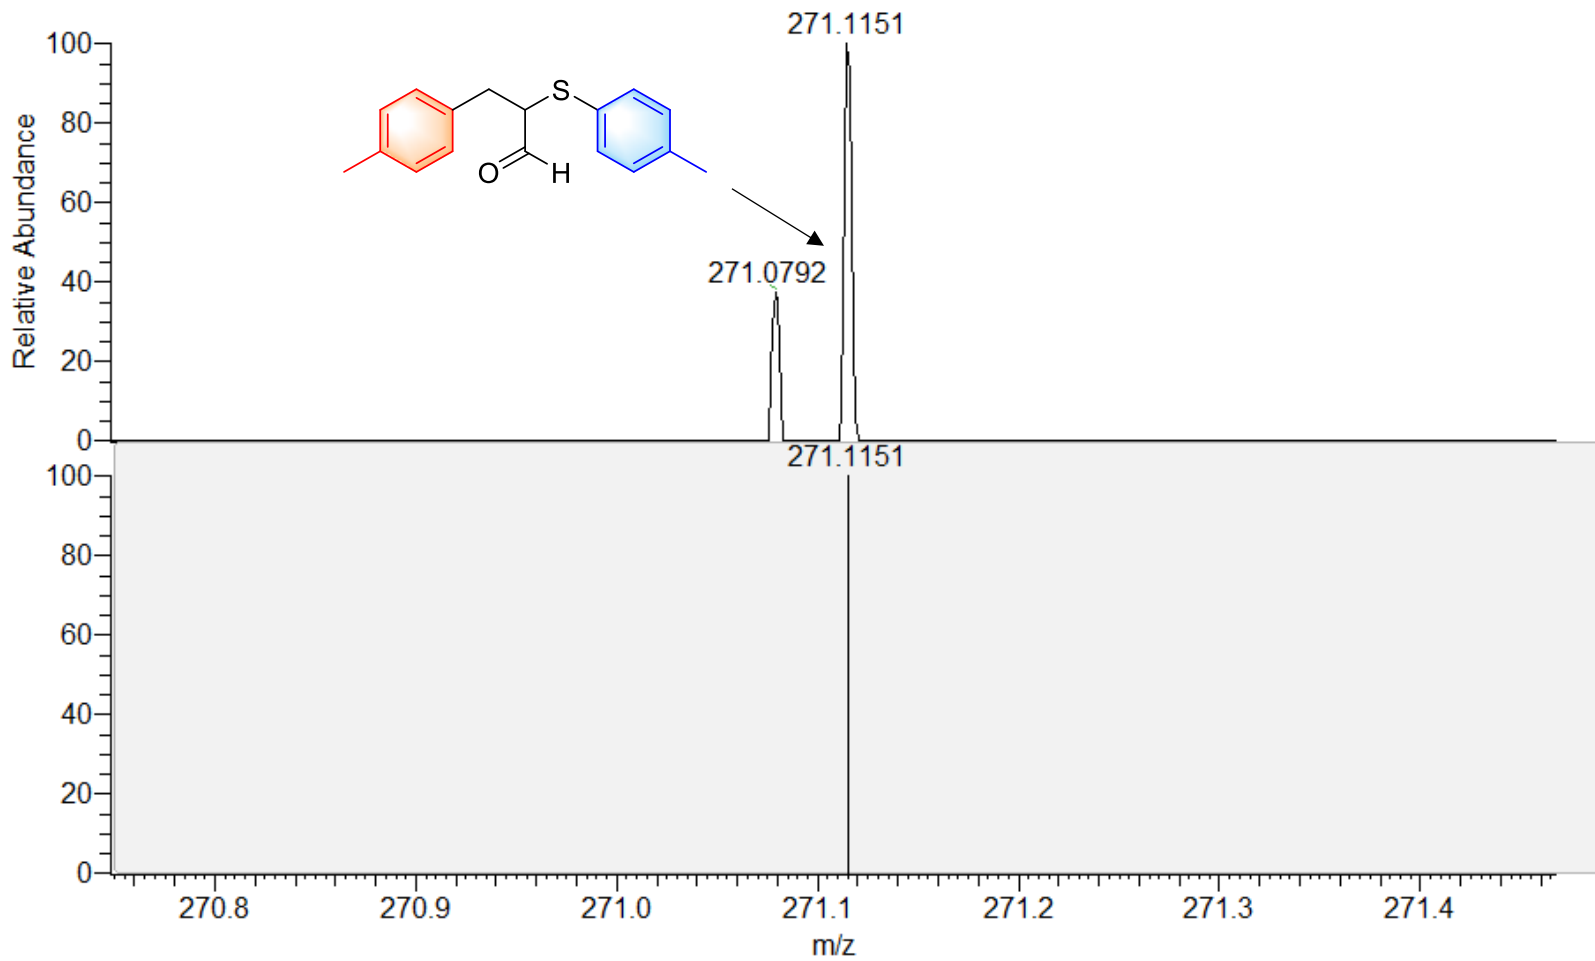

NL:  
4.02E5  
MOUDAN-M8#59  
RT: 0.26 AV: 1 T:  
FTMS + p ESI Full  
lock ms  
[75.0000-750.0000]

NL:  
7.87E5  
C<sub>17</sub> H<sub>18</sub> O<sub>1</sub> S<sub>1</sub> +H:  
C<sub>17</sub> H<sub>19</sub> O<sub>1</sub> S<sub>1</sub>  
pa Chrg 1

**3-(4-ethylphenyl)-2-(*p*-tolylthio)propanal (3ac)**

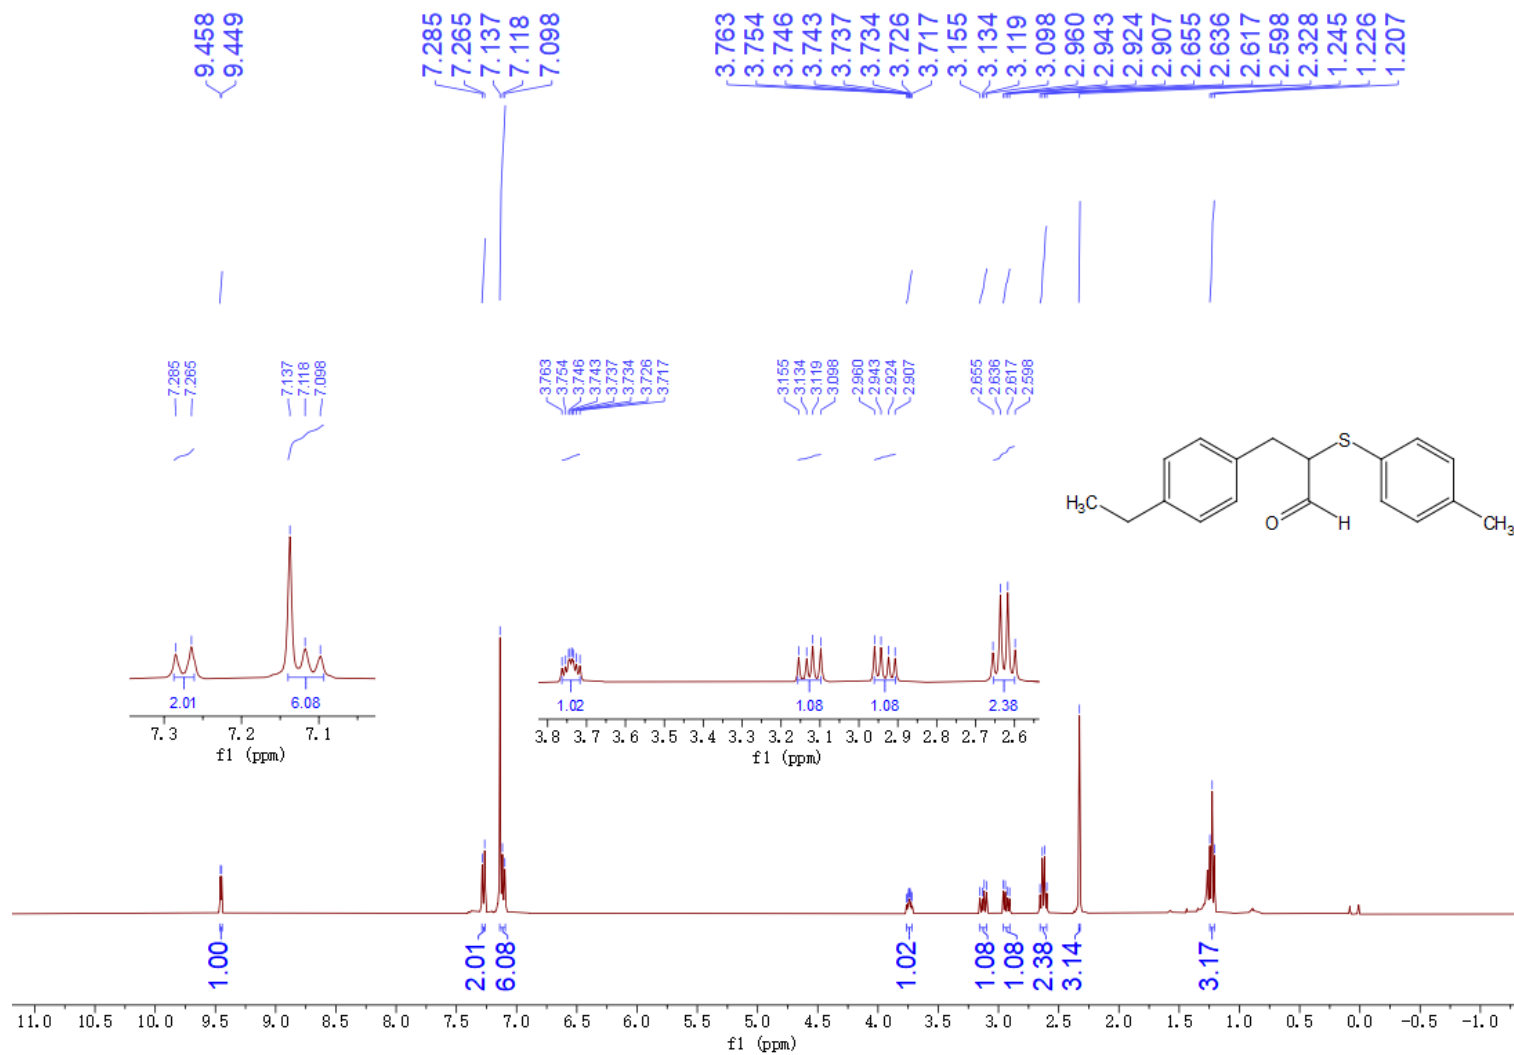

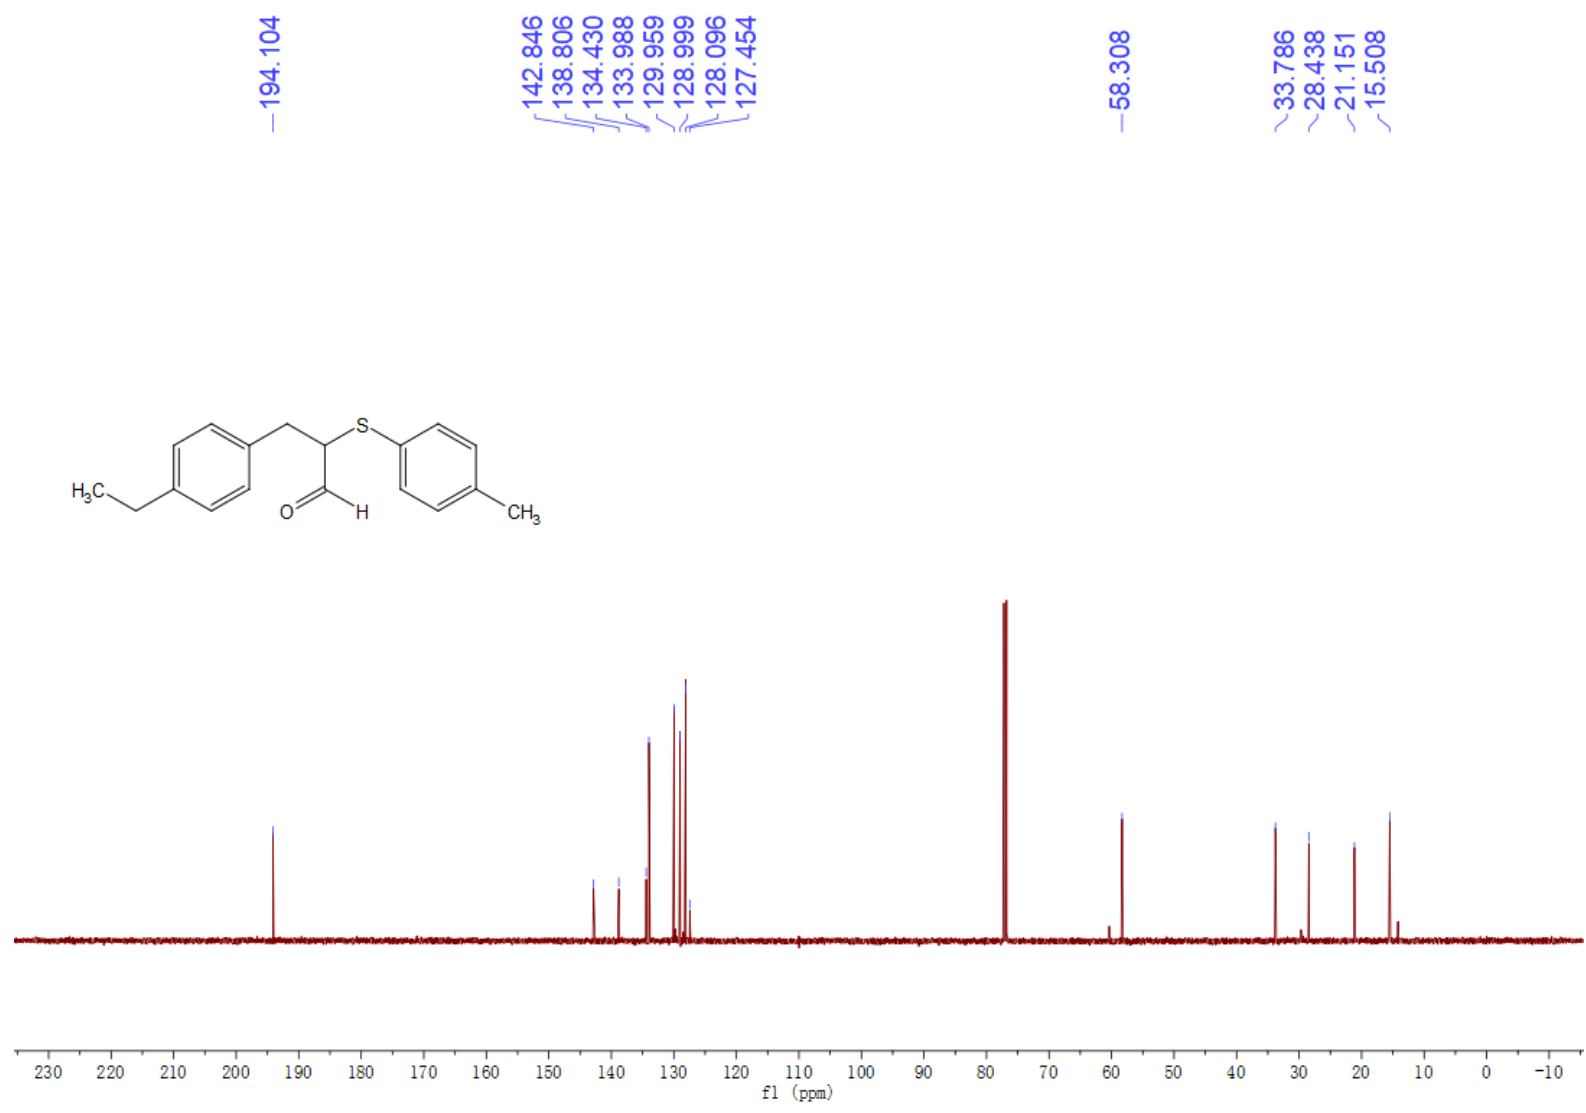

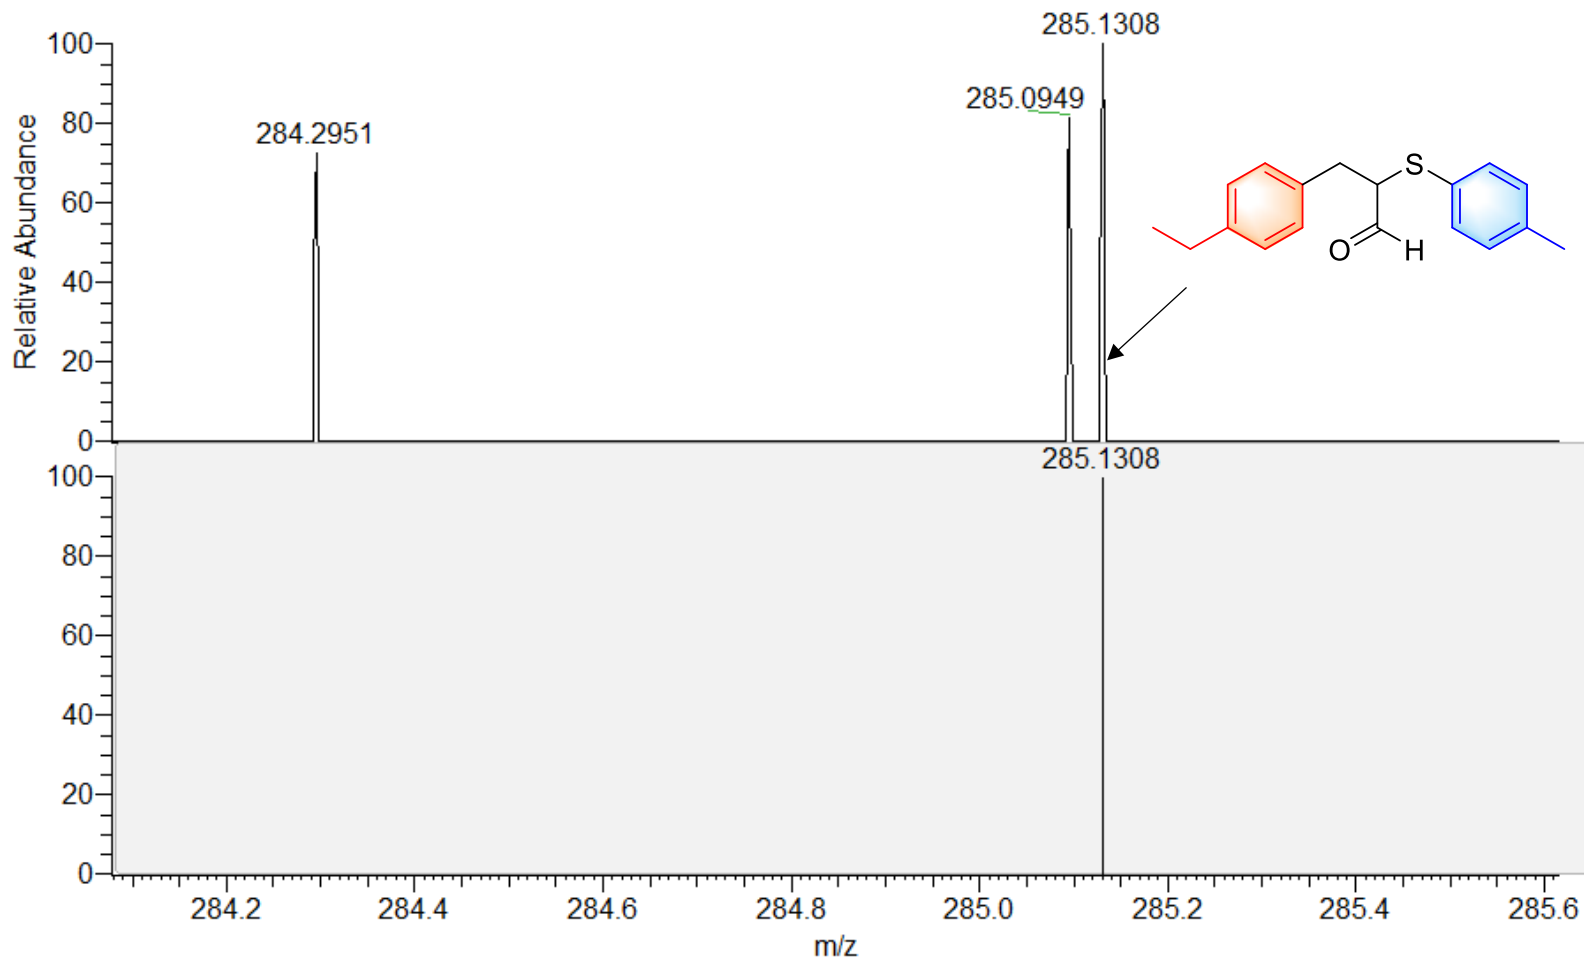

NL:  
 2.03E5  
 MOUDAN-M8#41  
 RT: 0.18 AV: 1 T:  
 FTMS + p ESI Full  
 lock ms  
 [75.0000-750.0000]

NL:  
 7.78E5  
 C<sub>18</sub> H<sub>20</sub> OS +H:  
 C<sub>18</sub> H<sub>21</sub> O<sub>1</sub> S<sub>1</sub>  
 pa Chrg 1

**3-(4-methoxyphenyl)-2-(*p*-tolylthio)propanal (3ad)**

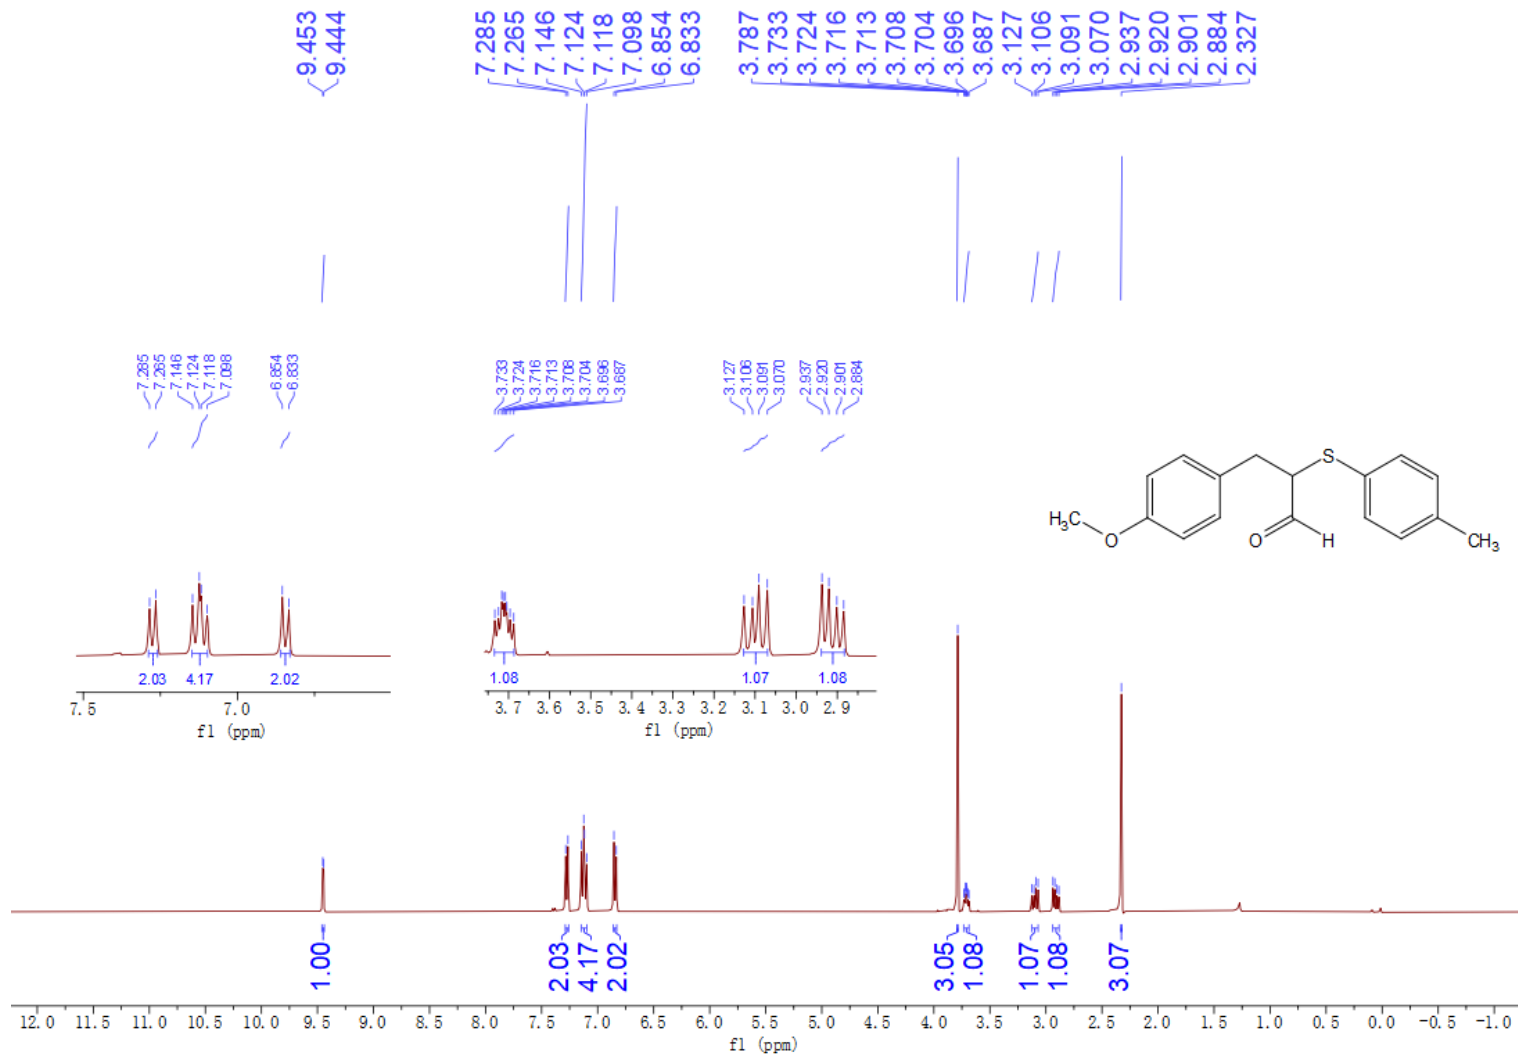



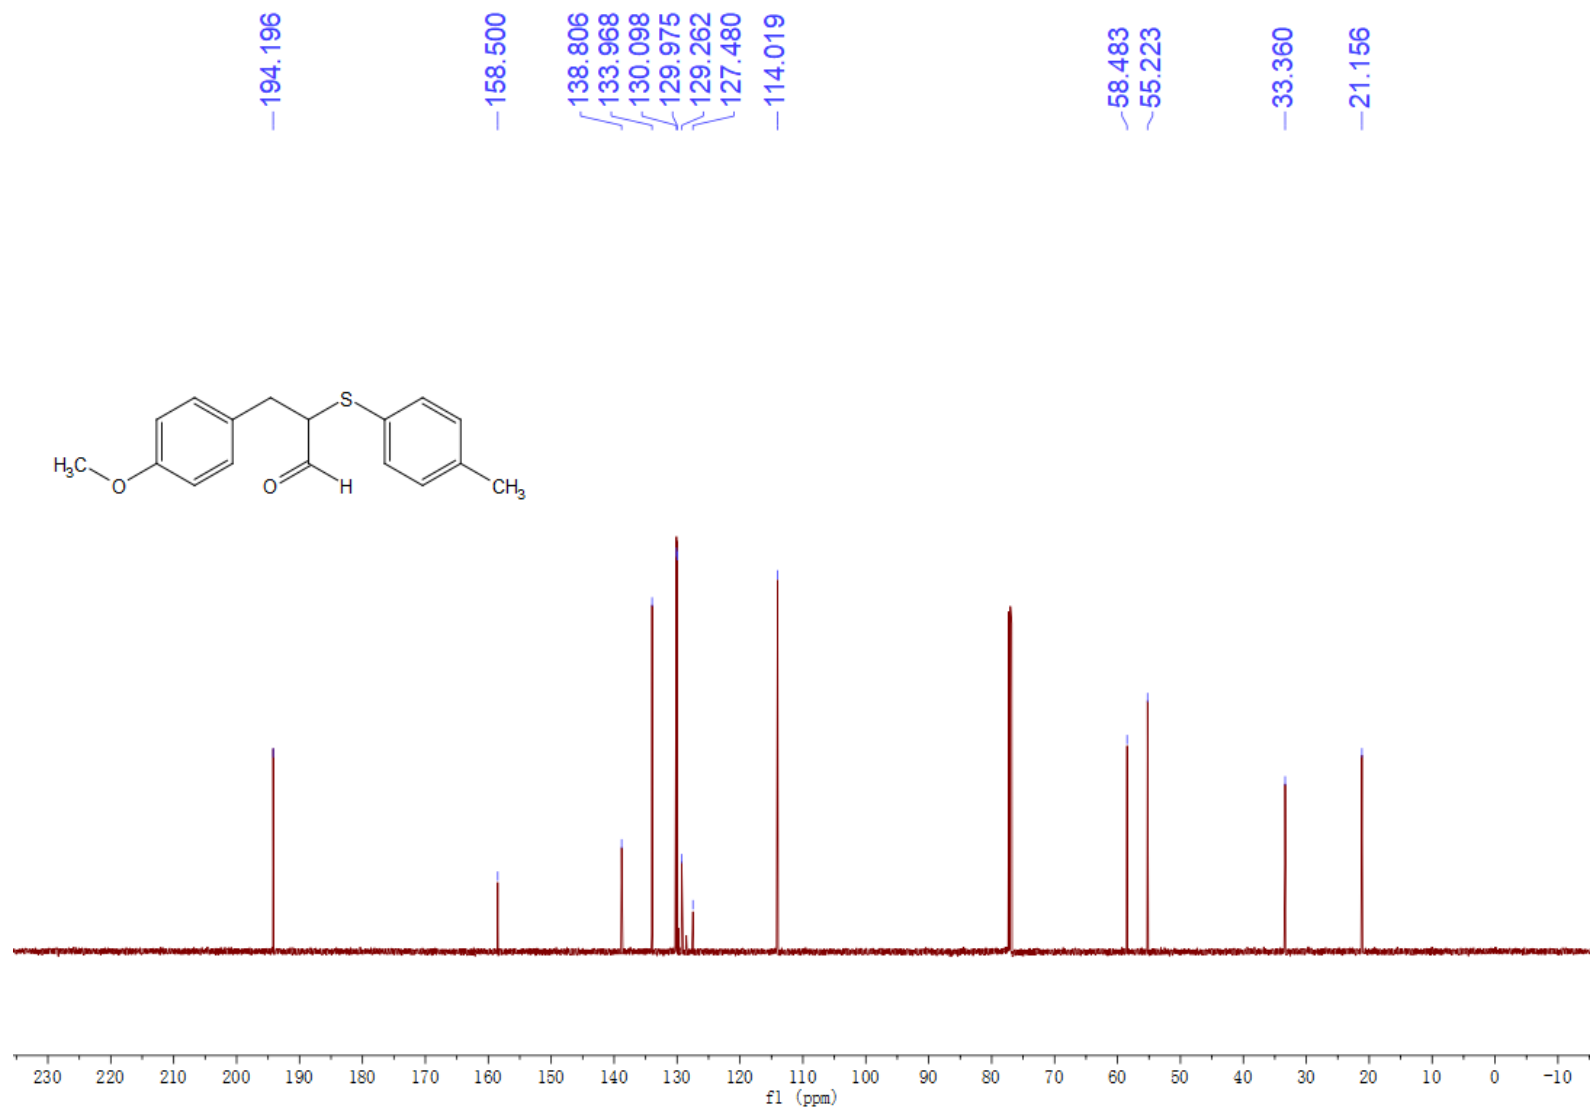

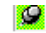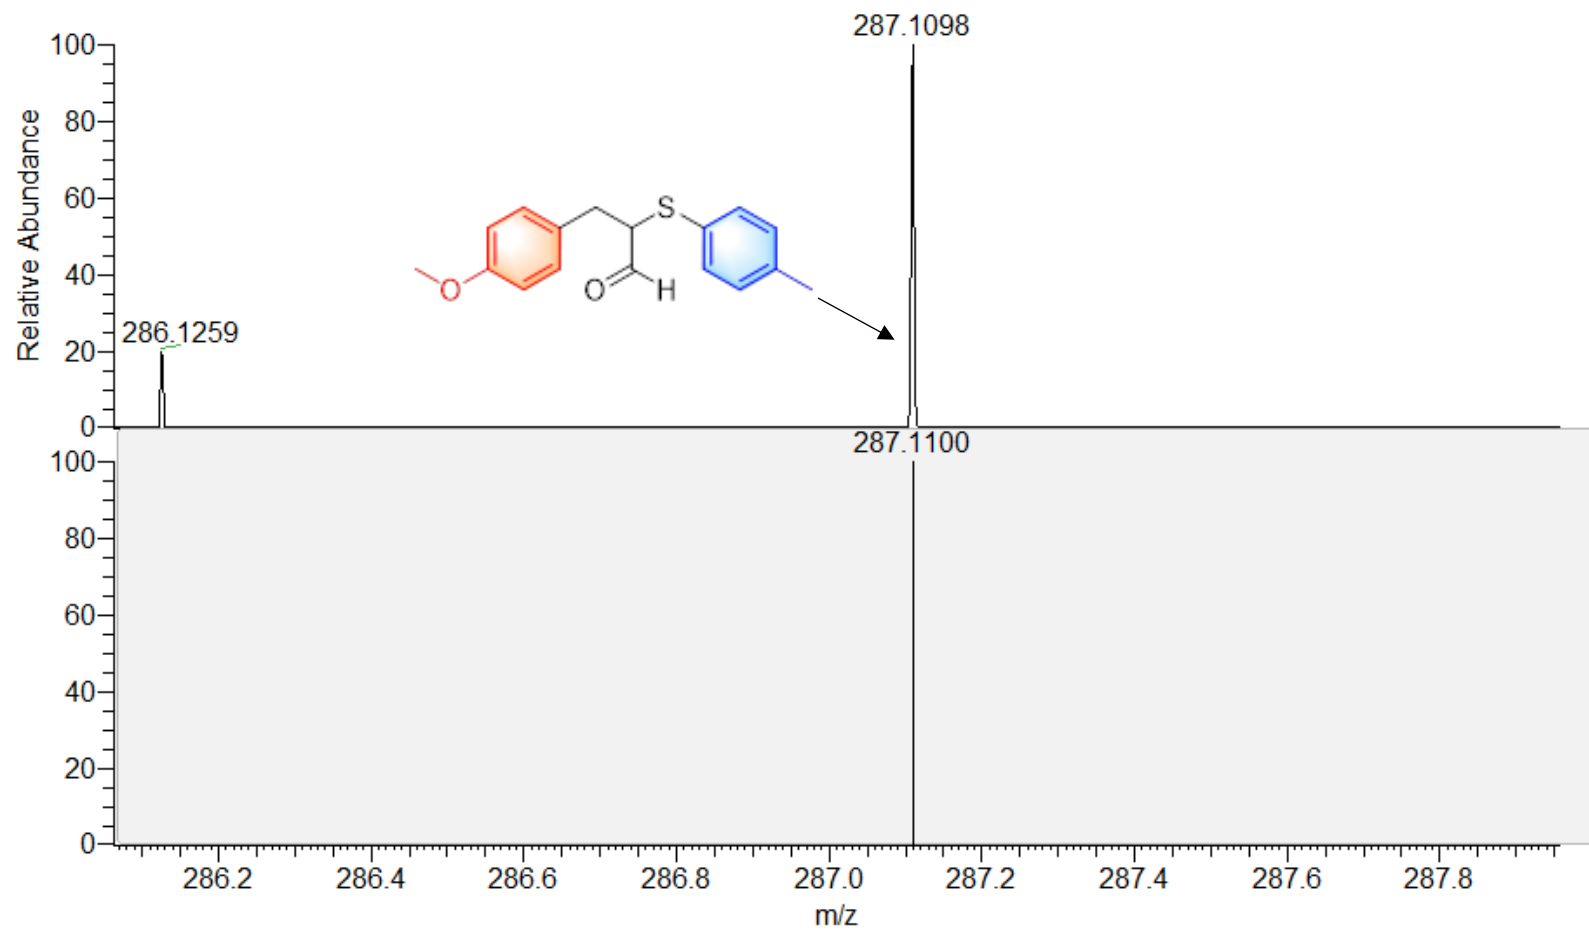

NL:  
2.59E6  
DZHY-MOUDAN-  
M7#1 RT: 0.00 AV:  
1 T: FTMS + p ESI  
Full lock ms  
[60.0000-750.0000]

NL:  
7.85E5  
C<sub>17</sub> H<sub>18</sub> O<sub>2</sub> S +H:  
C<sub>17</sub> H<sub>19</sub> O<sub>2</sub> S<sub>1</sub>  
pa Chrg 1

**3-(4-(*tert*-butyl)phenyl)-2-(*p*-tolylthio)propanal (3ae)**

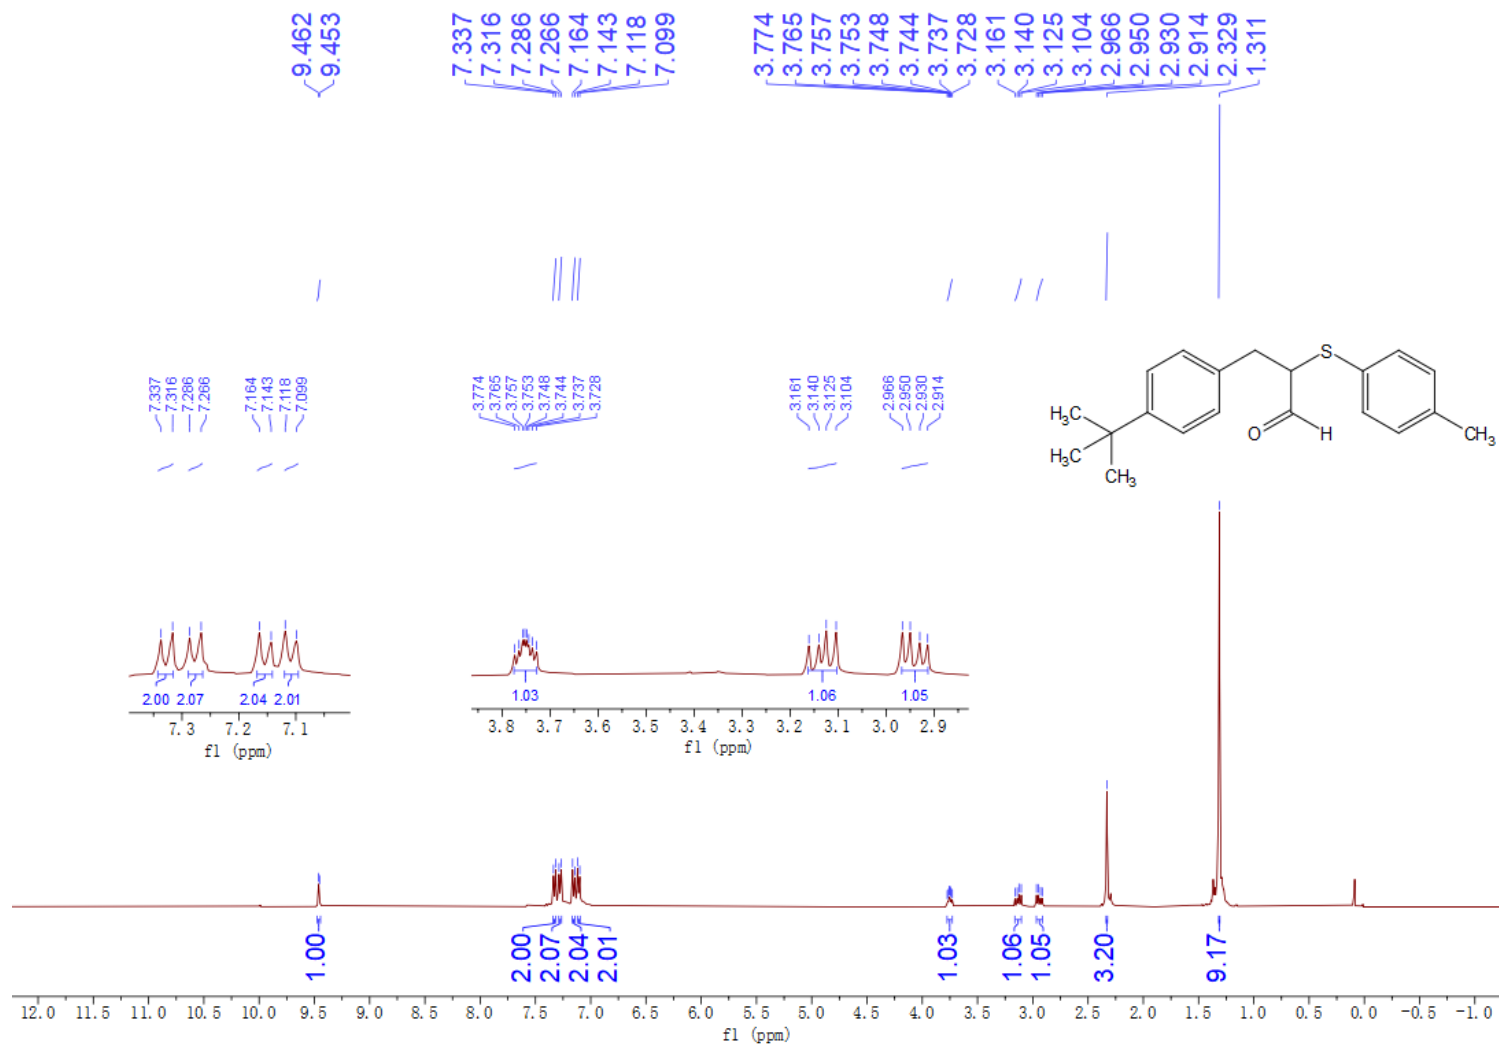

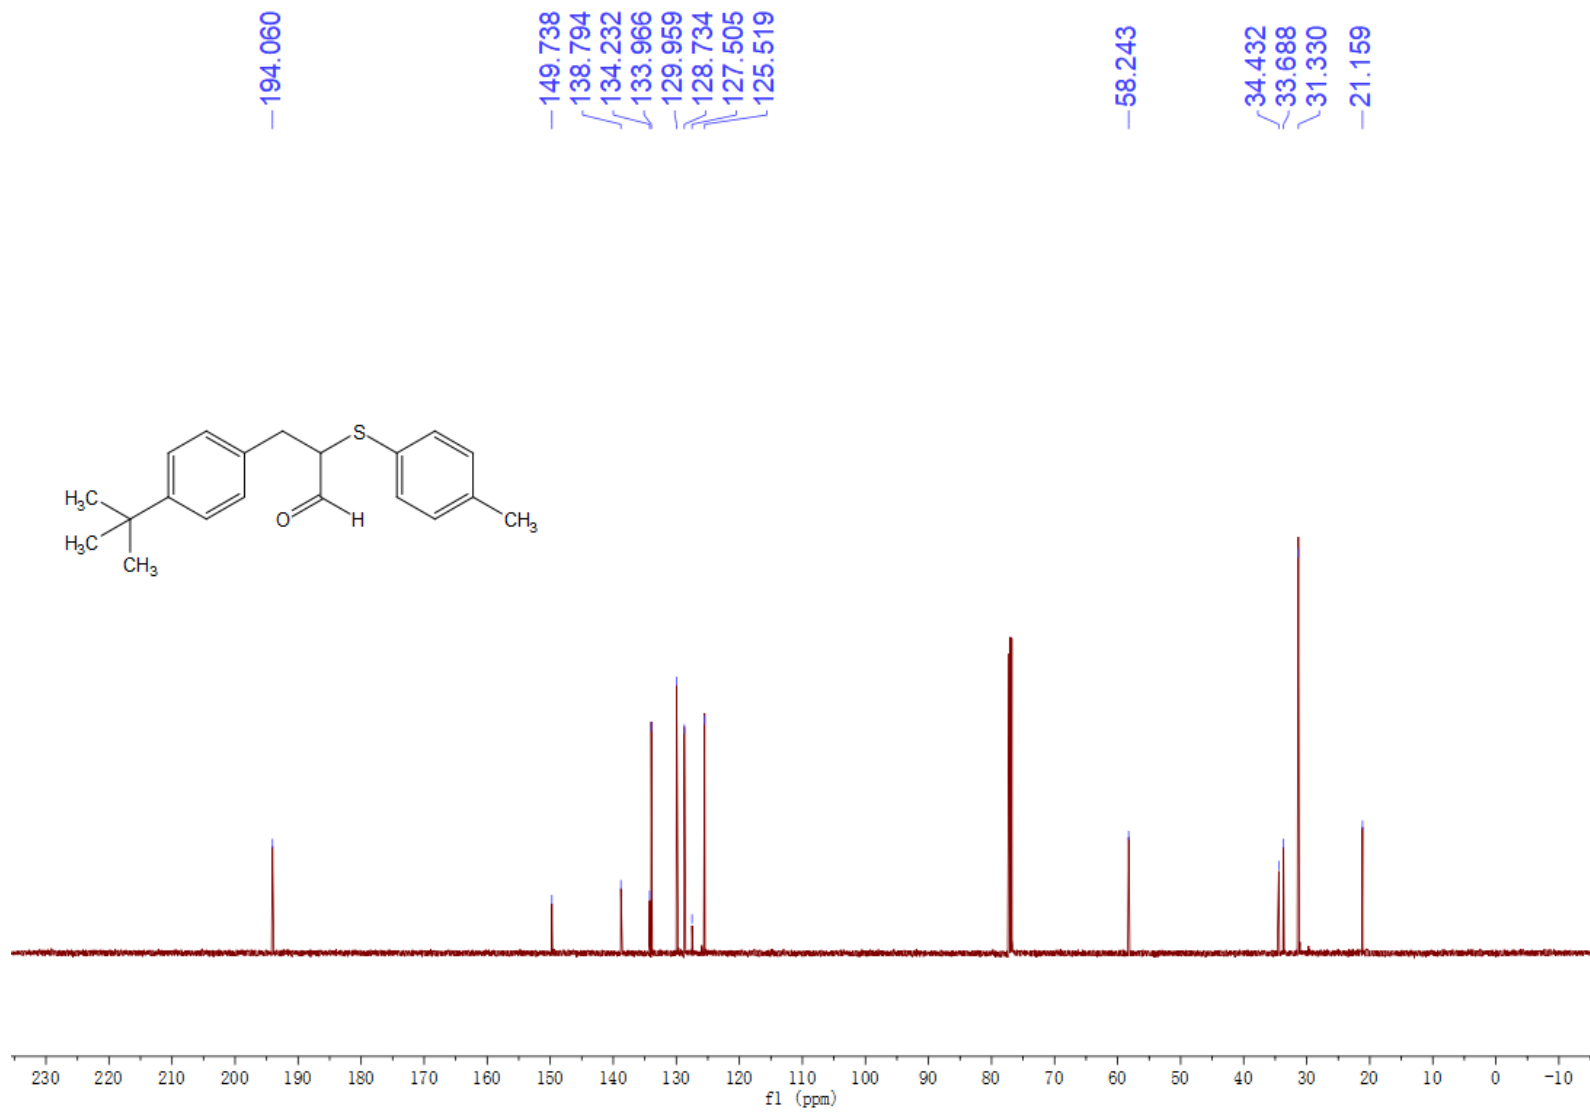

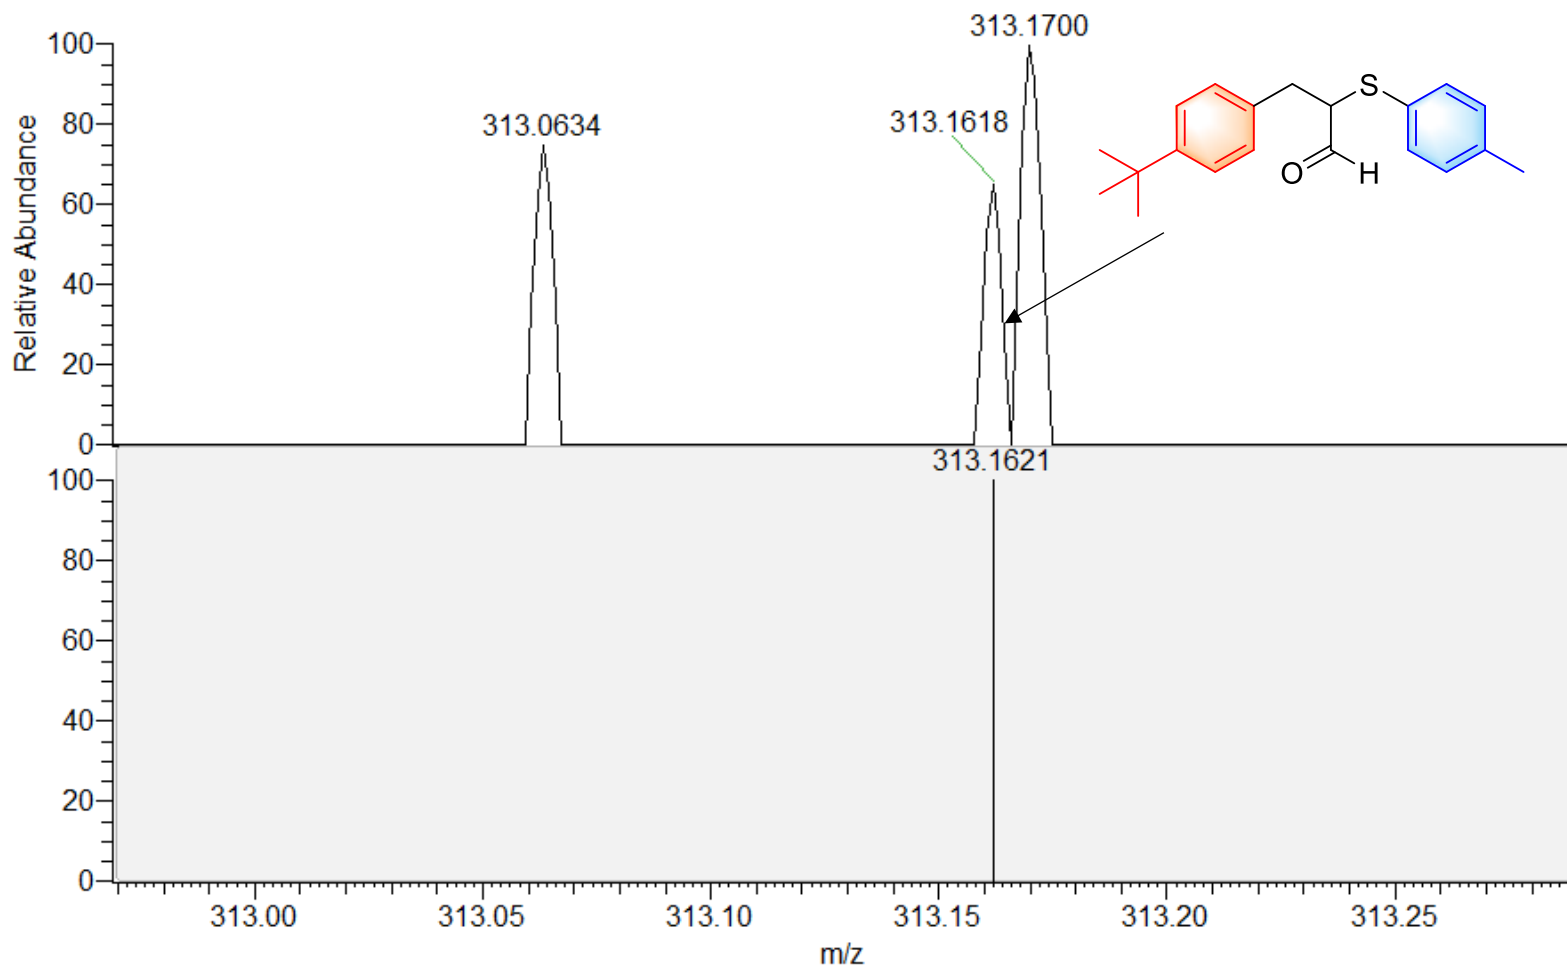

NL:  
 1.37E5  
 MOUDAN-M8#66  
 RT: 0.29 AV: 1 T:  
 FTMS + p ESI Full  
 lock ms  
 [75.0000-750.0000]

NL:  
 7.61E5  
 C<sub>20</sub> H<sub>24</sub> OS +H:  
 C<sub>20</sub> H<sub>25</sub> O<sub>1</sub> S<sub>1</sub>  
 pa Chrg 1

3-([1,1'-biphenyl]-4-yl)-2-(*p*-tolylthio)propanal (3af)

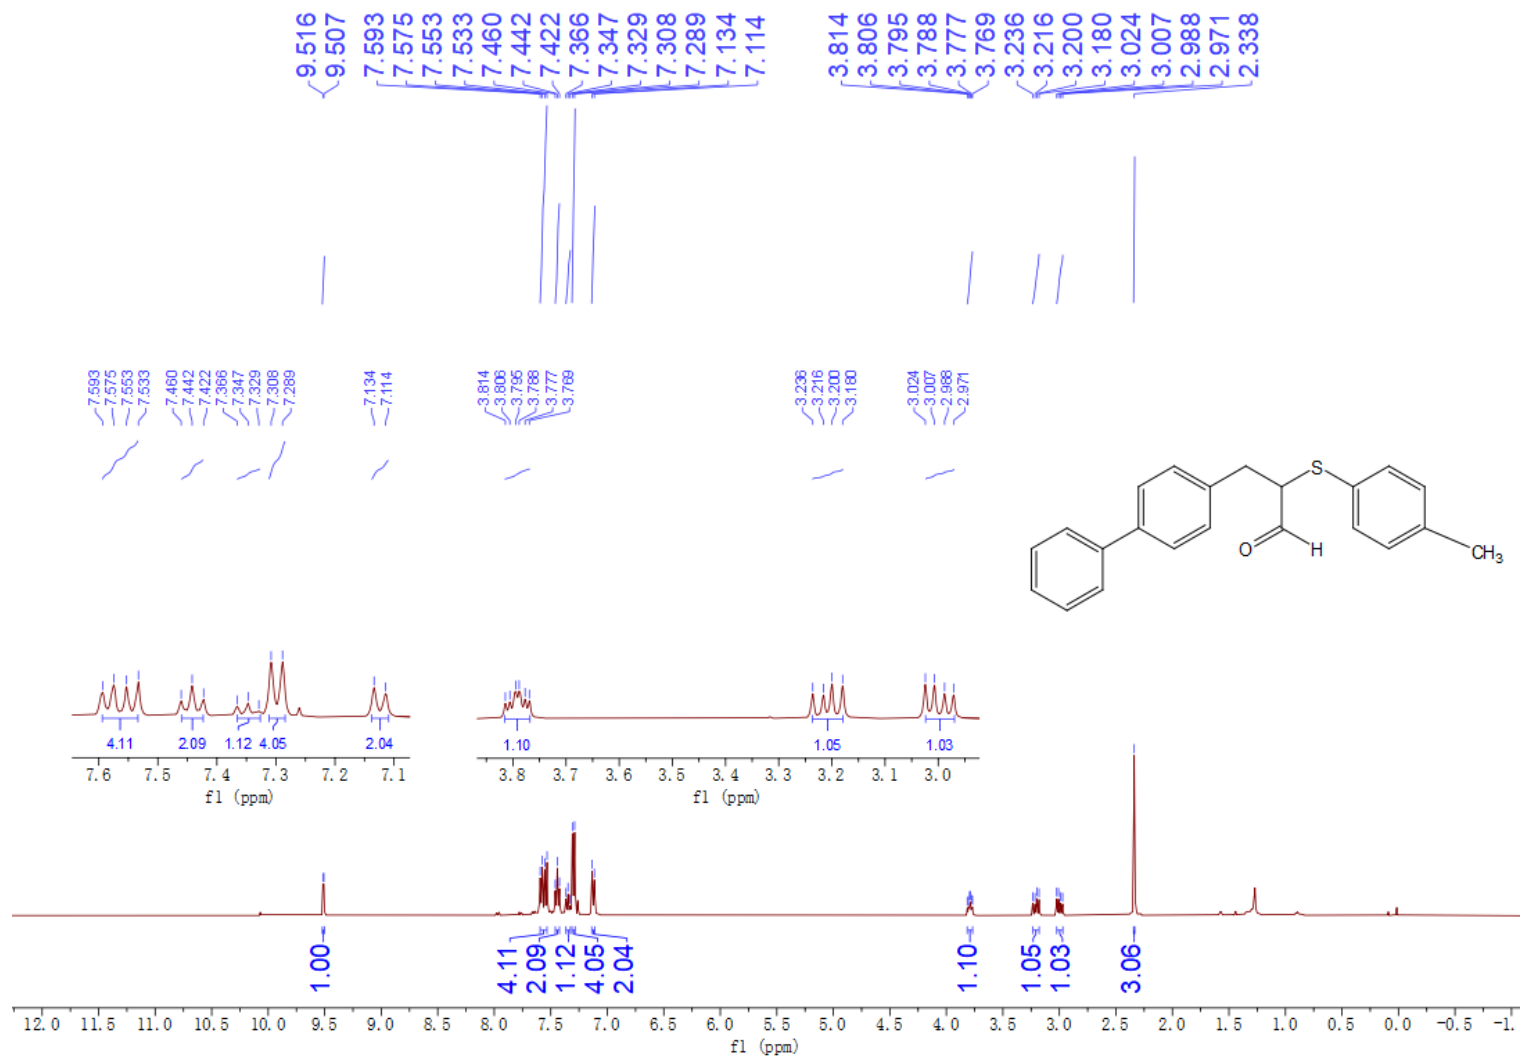

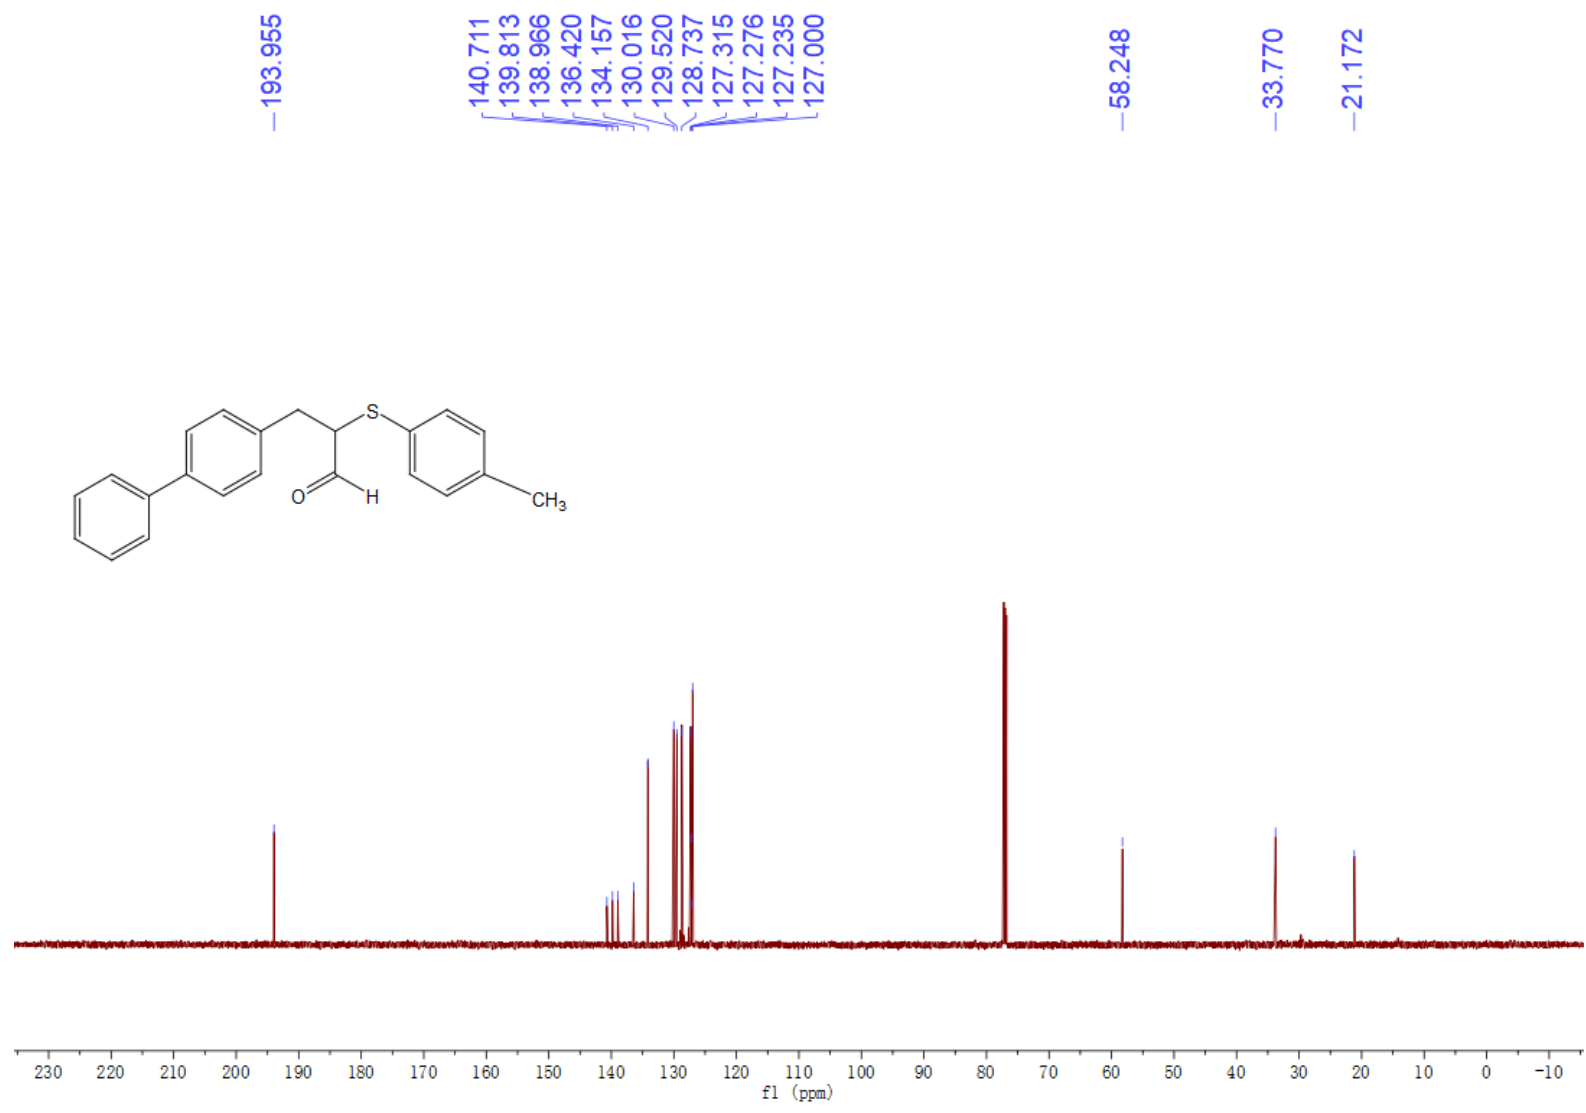

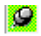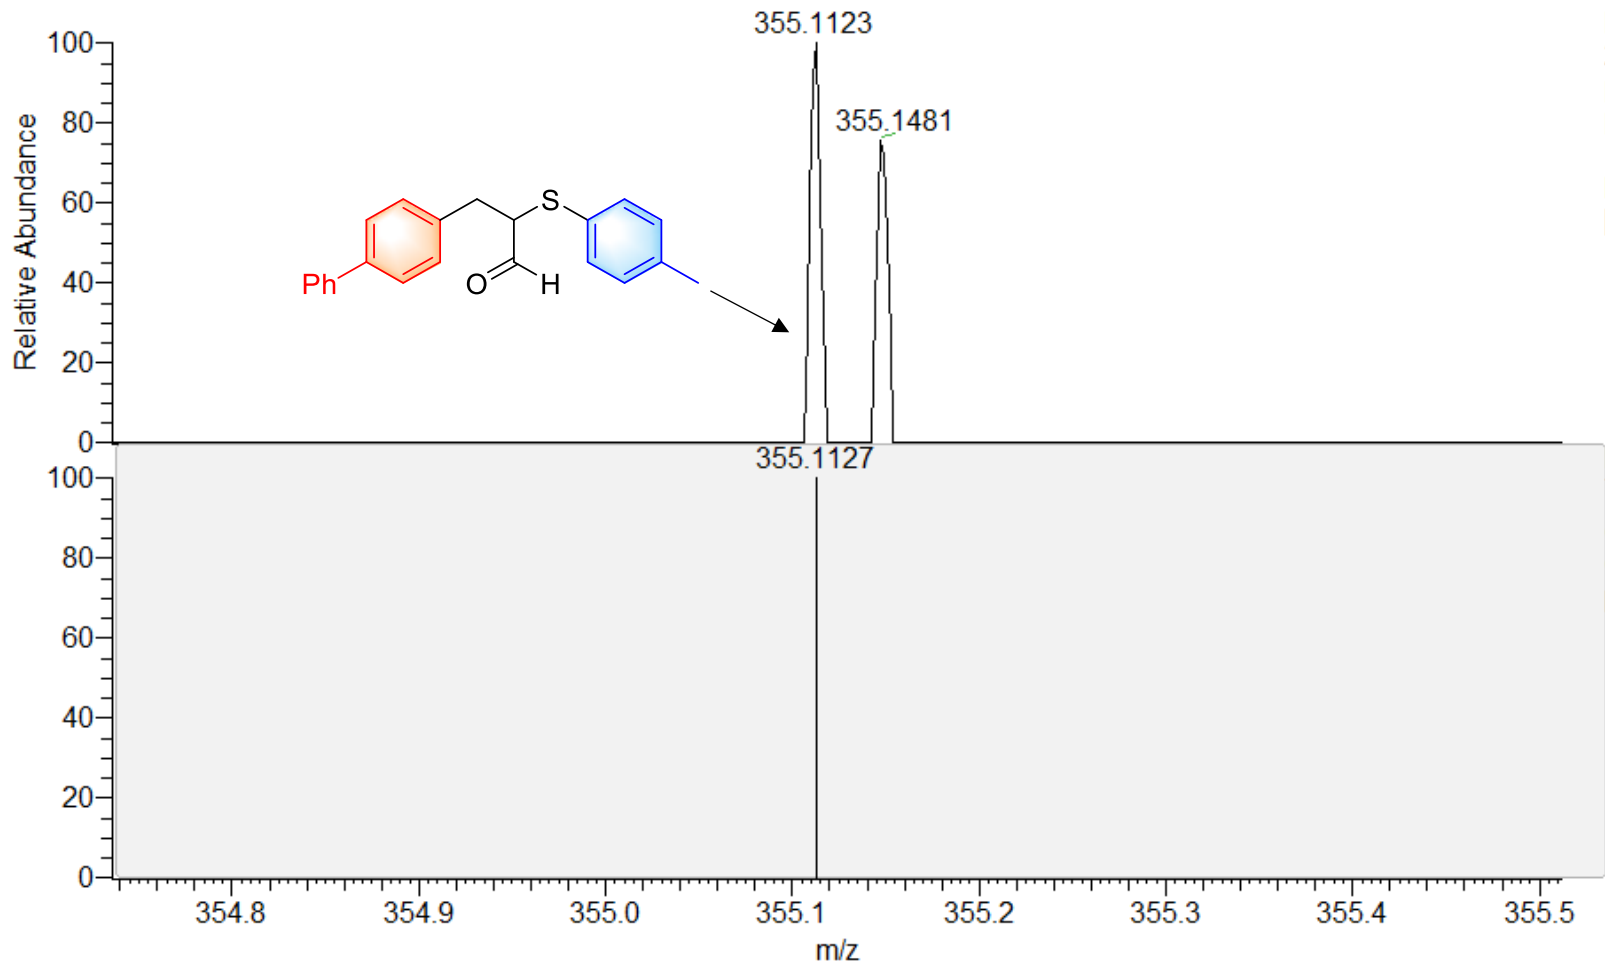

NL:  
2.28E5  
MOUDAN-M8#52  
RT: 0.23 AV: 1 T:  
FTMS + p ESI Full  
lock ms  
[75.0000-750.0000]

NL:  
7.46E5  
C<sub>22</sub> H<sub>20</sub> OS +Na:  
C<sub>22</sub> H<sub>20</sub> O<sub>1</sub> S<sub>1</sub> Na<sub>1</sub>  
pa Chrg 1



**3-(3-methoxyphenyl)-2-(*p*-tolylthio)propanal (3ag)**

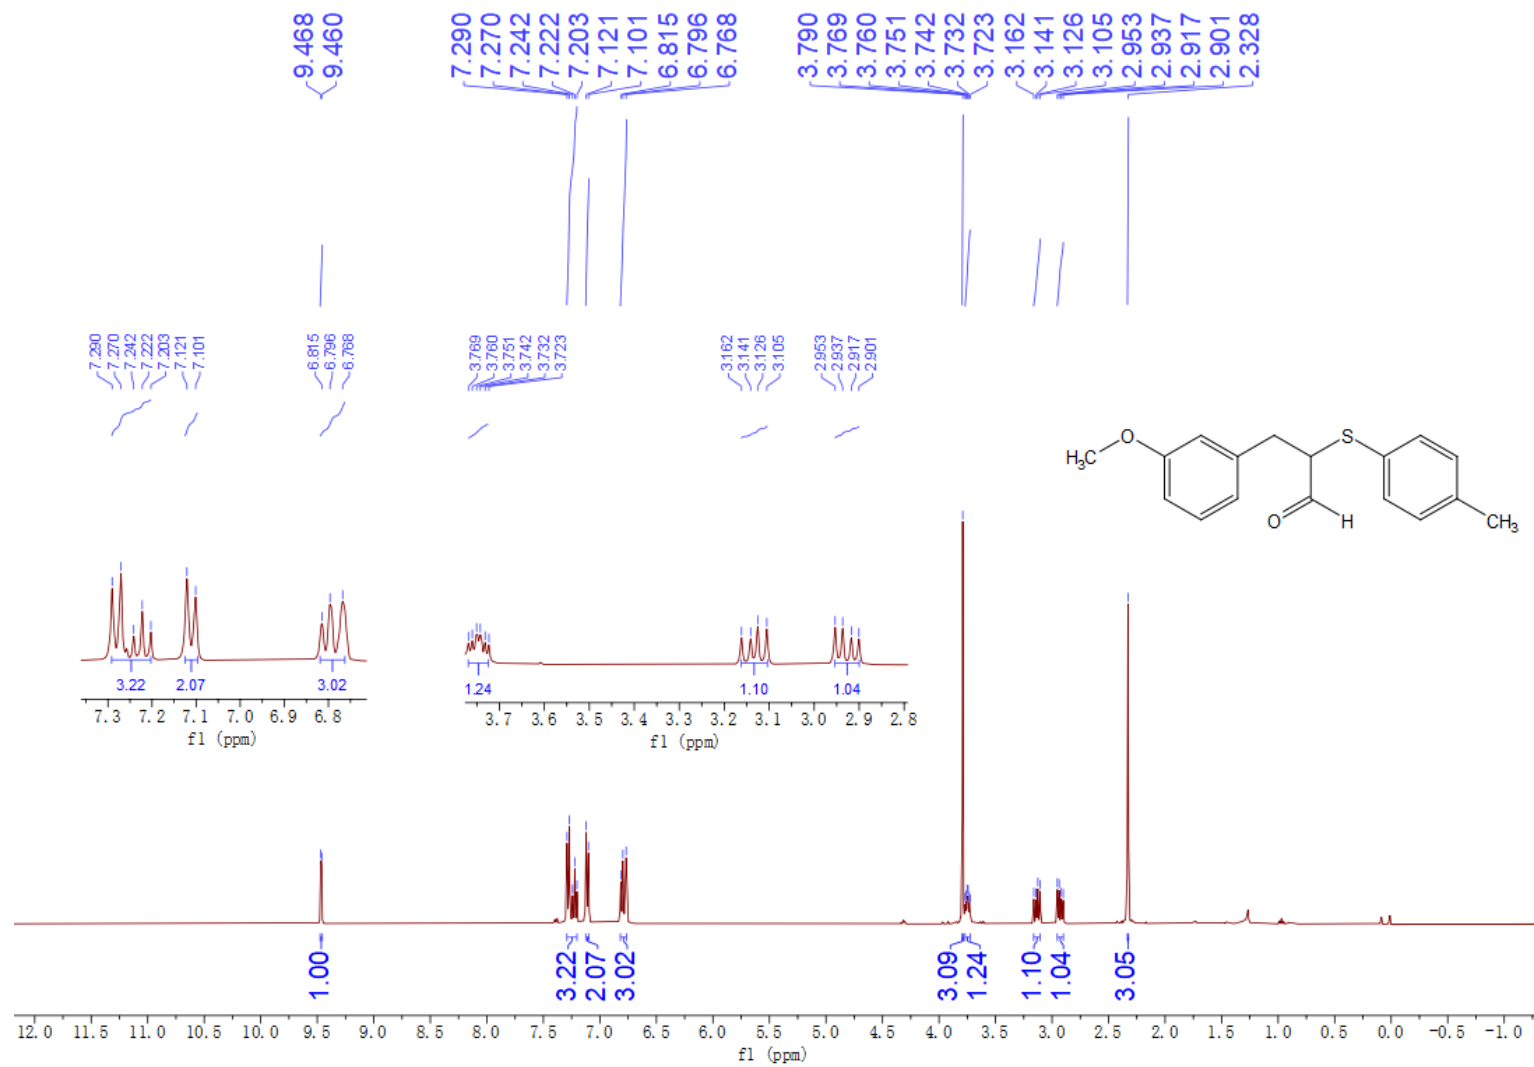

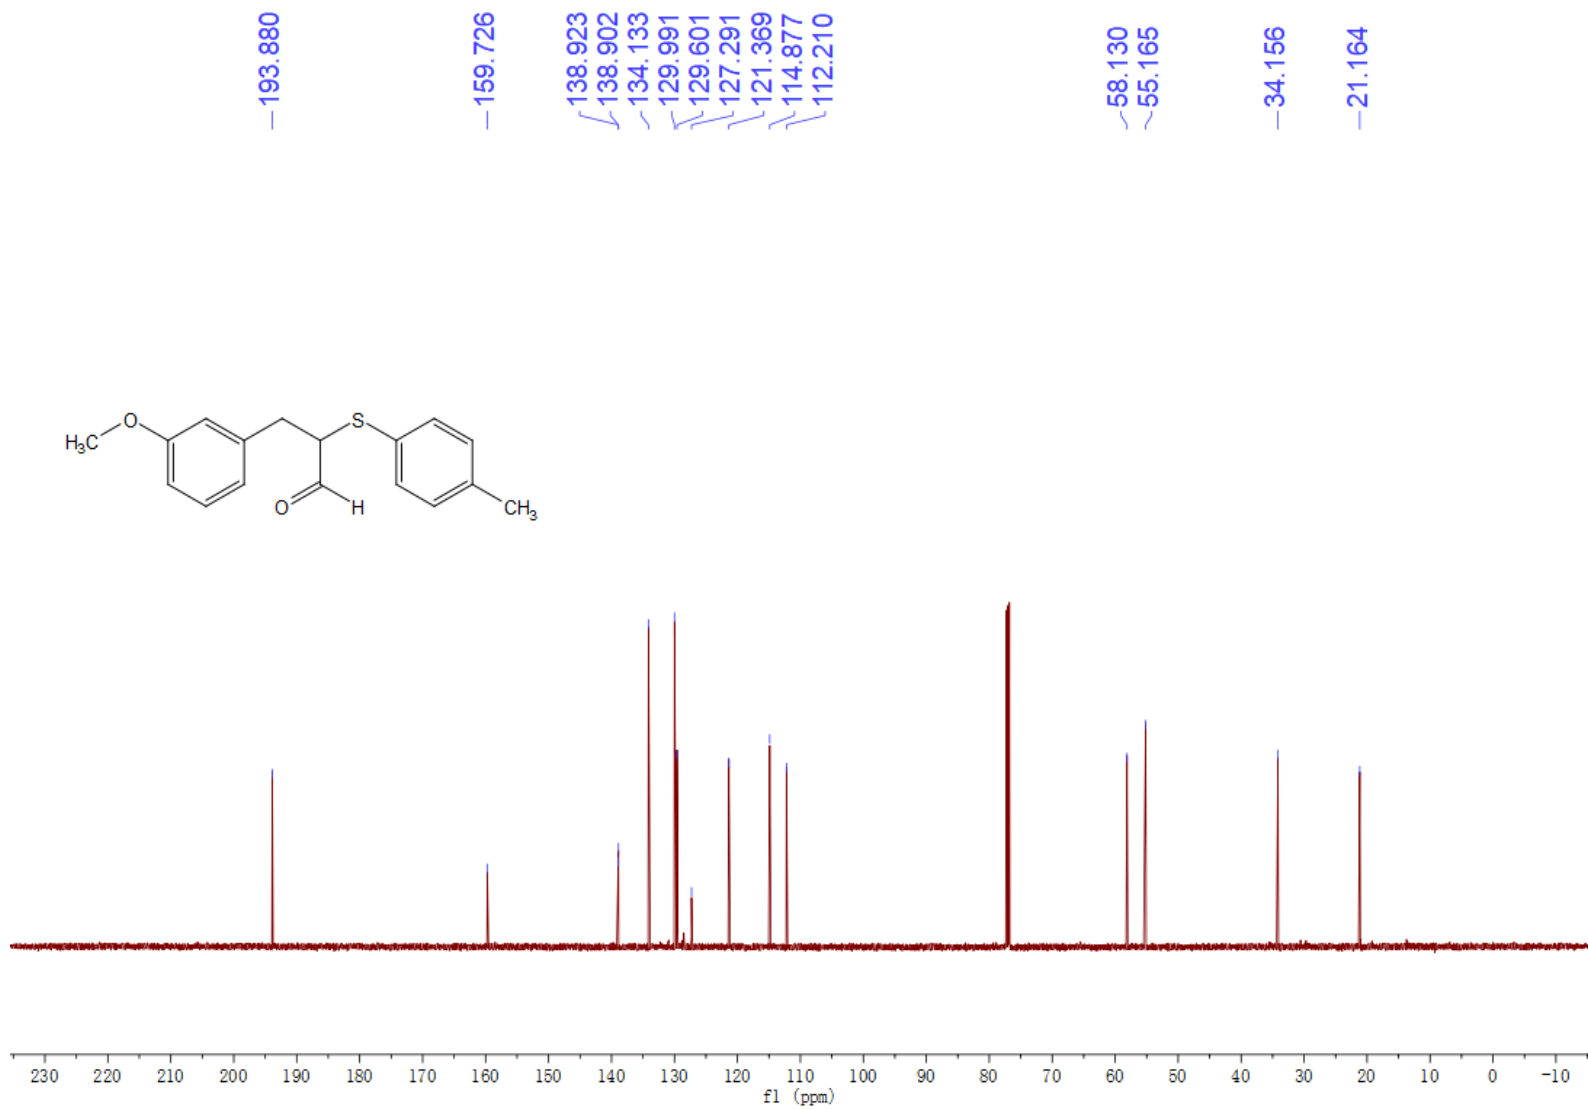

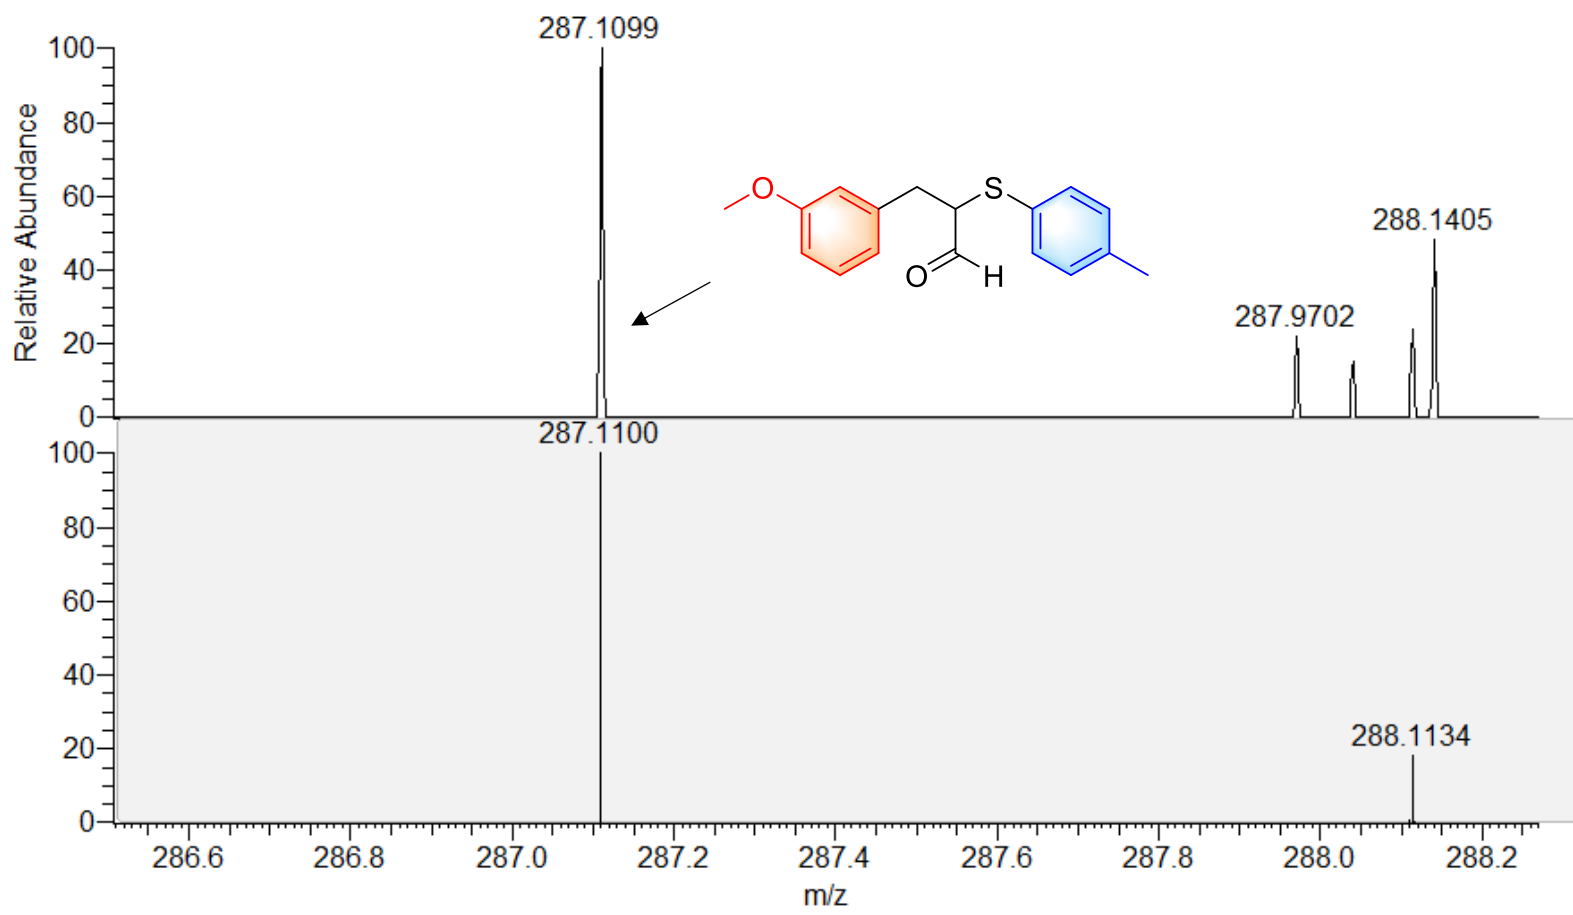

NL:  
 2.66E6  
 DZHY-MOUDAN-  
 M7#3 RT: 0.01 AV:  
 1 T: FTMS + p ESI  
 Full lock ms  
 [60.0000-750.0000]

NL:  
 7.85E5  
 C<sub>17</sub> H<sub>18</sub> O<sub>2</sub> S +H:  
 C<sub>17</sub> H<sub>19</sub> O<sub>2</sub> S<sub>1</sub>  
 pa Chrg 1

**3-(2-methoxyphenyl)-2-(*p*-tolylthio)propanal (3ah)**

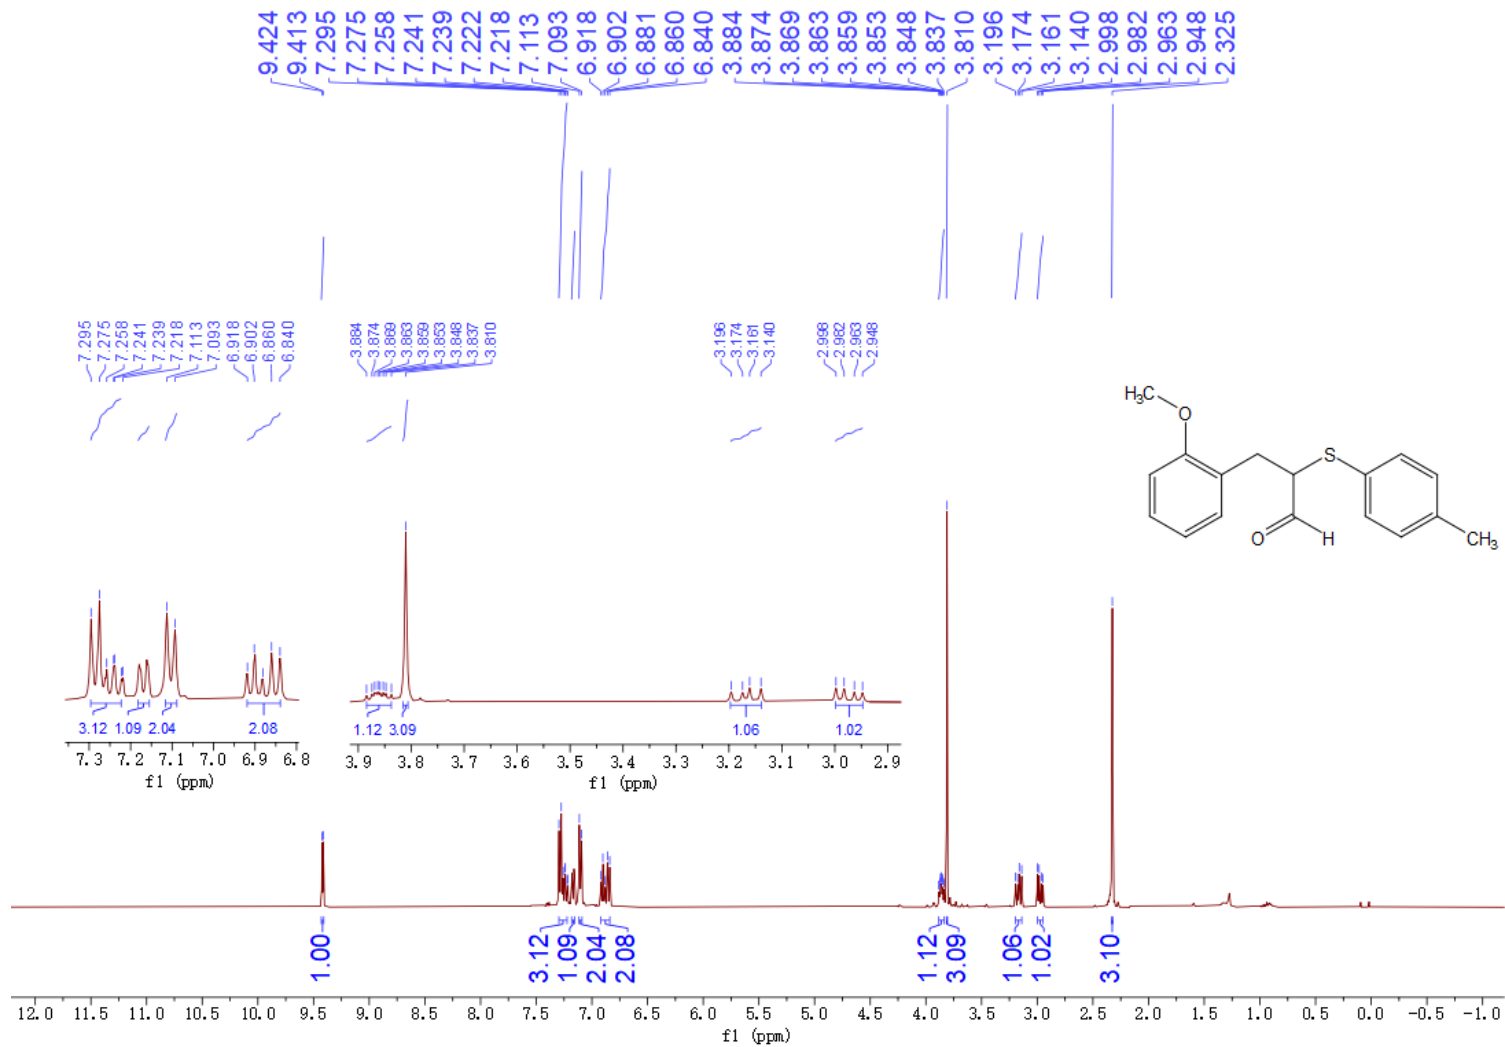

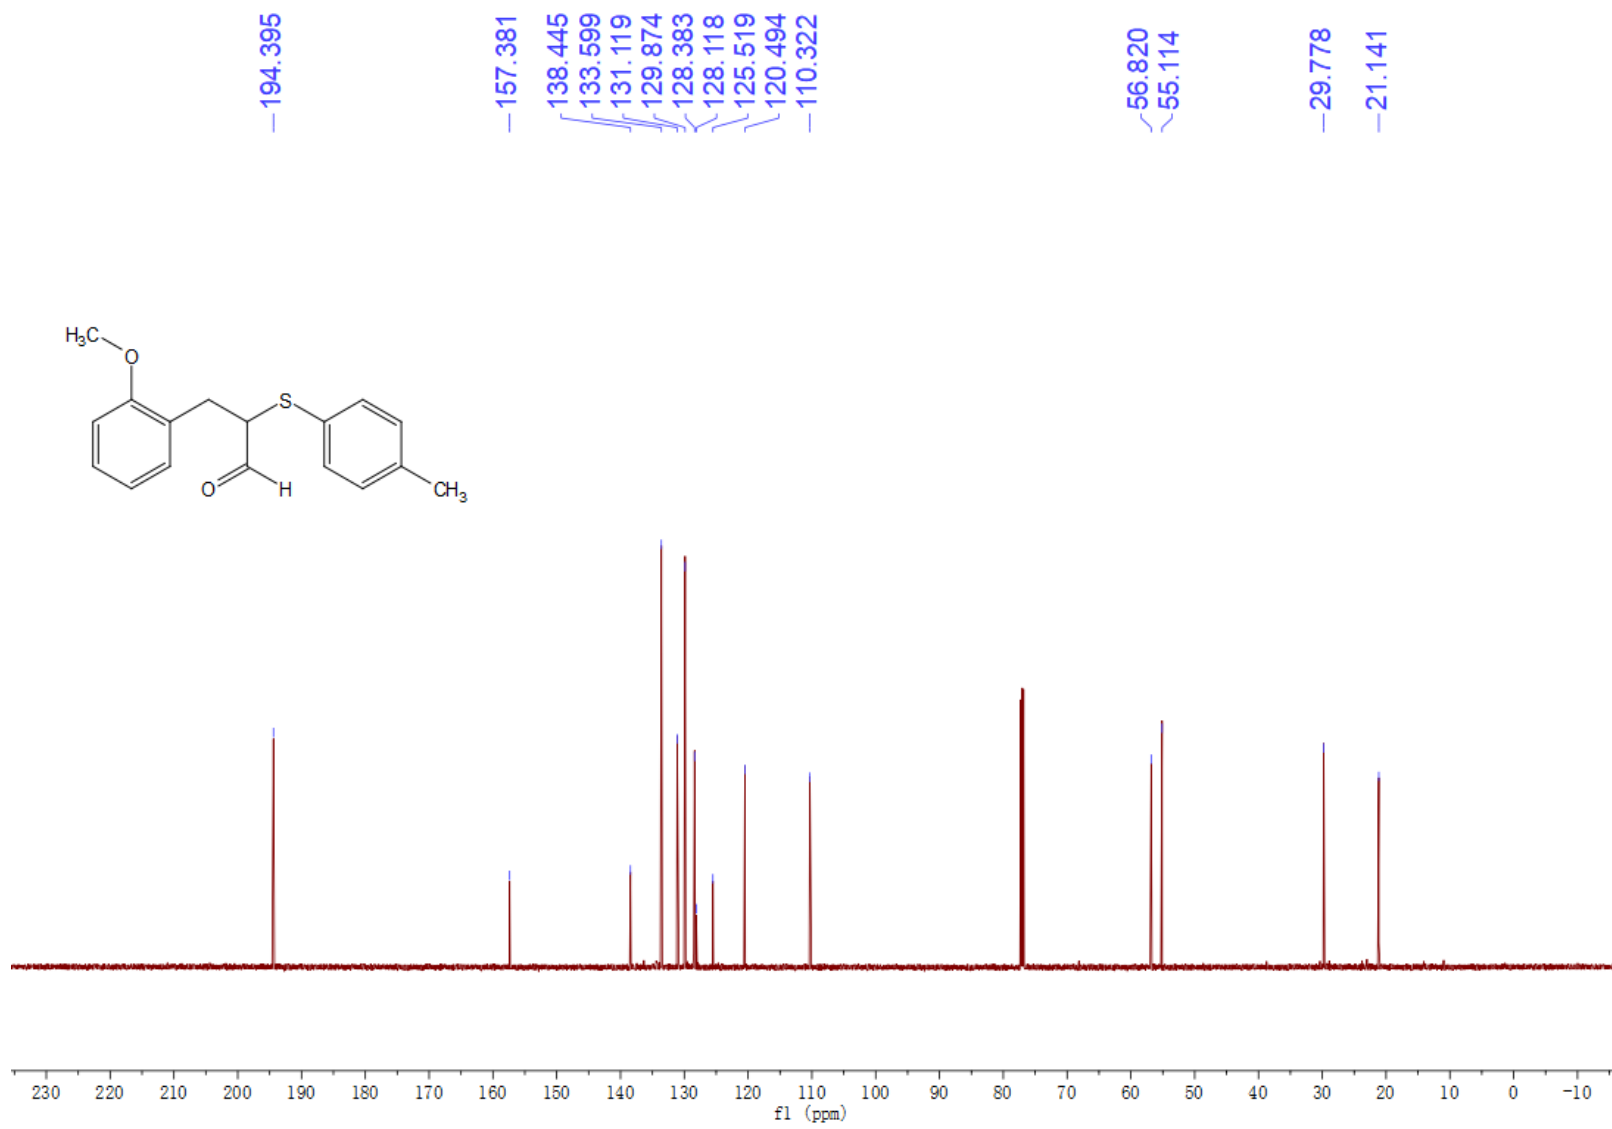

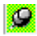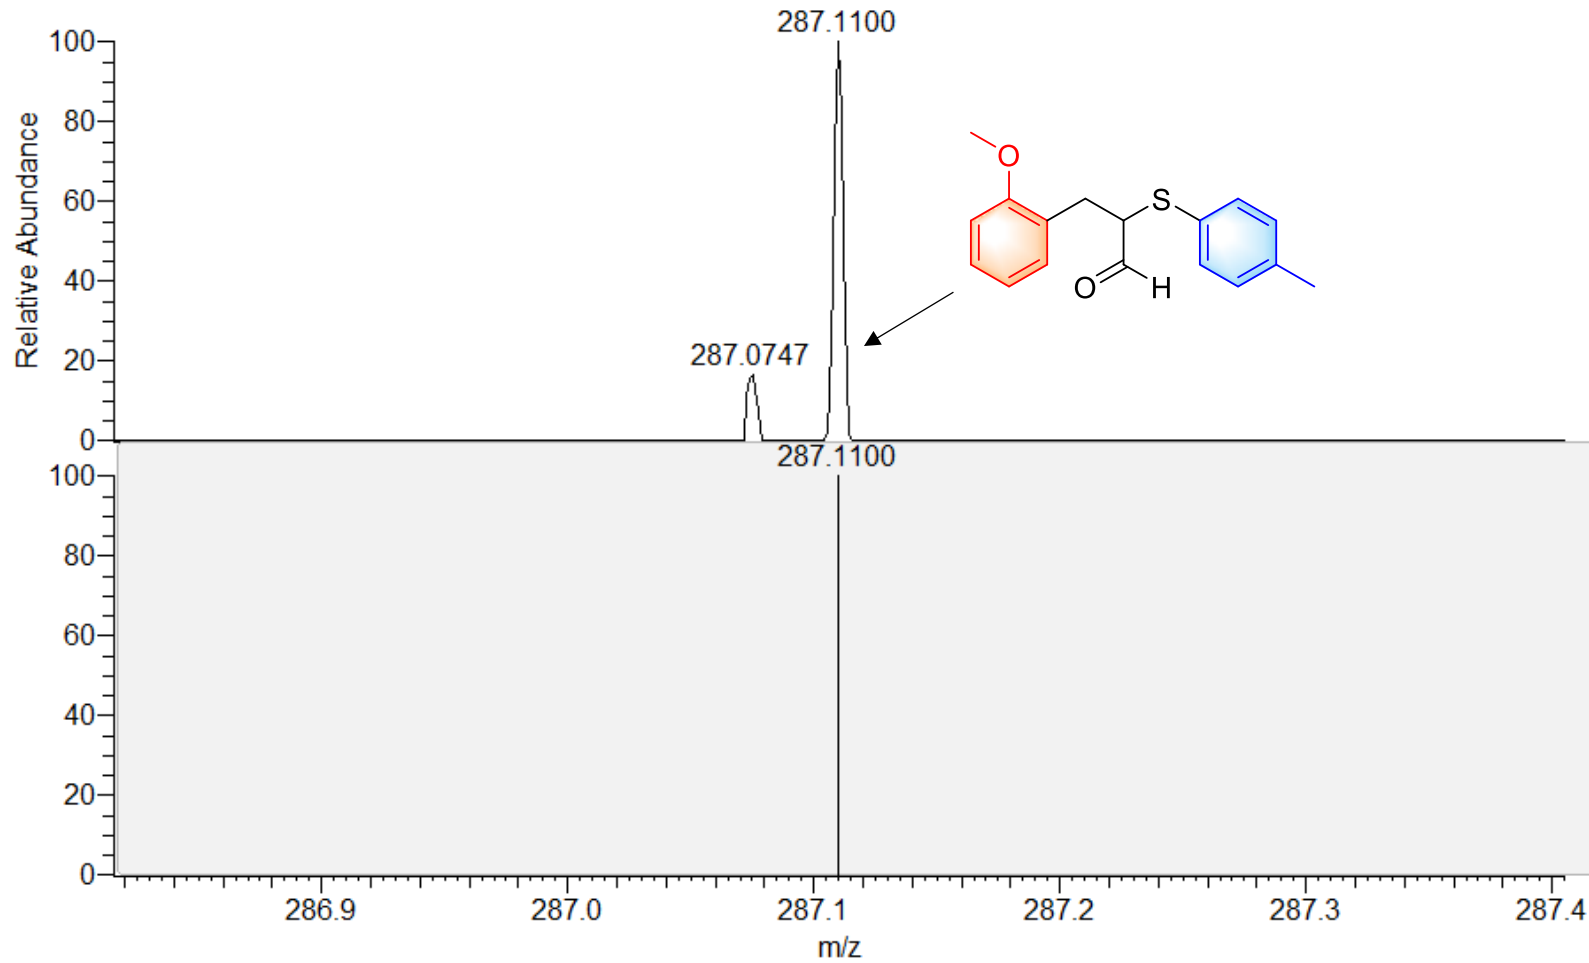

NL:  
5.49E5  
MOUDAN-M8#70  
RT: 0.31 AV: 1 T:  
FTMS + p ESI Full  
lock ms  
[75.0000-750.0000]

NL:  
7.85E5  
C<sub>17</sub> H<sub>18</sub> O<sub>2</sub> S +H:  
C<sub>17</sub> H<sub>19</sub> O<sub>2</sub> S<sub>1</sub>  
pa Chrg 1

**3-(4-fluorophenyl)-2-(*p*-tolylthio)propanal (3ai)**

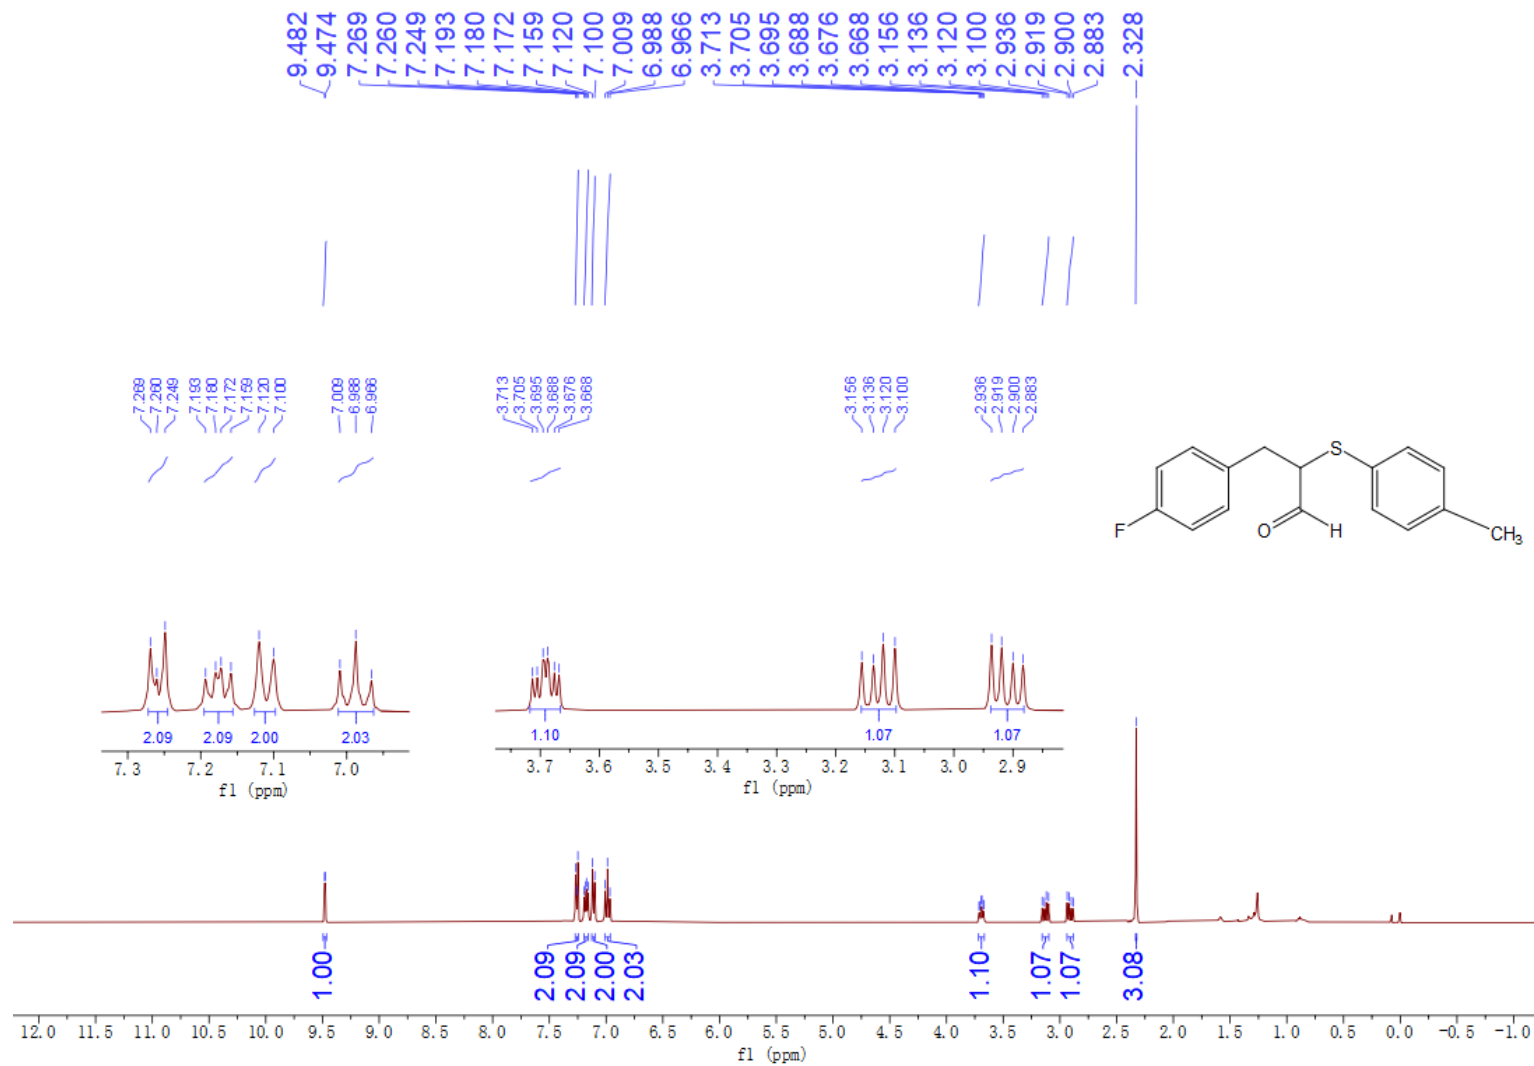

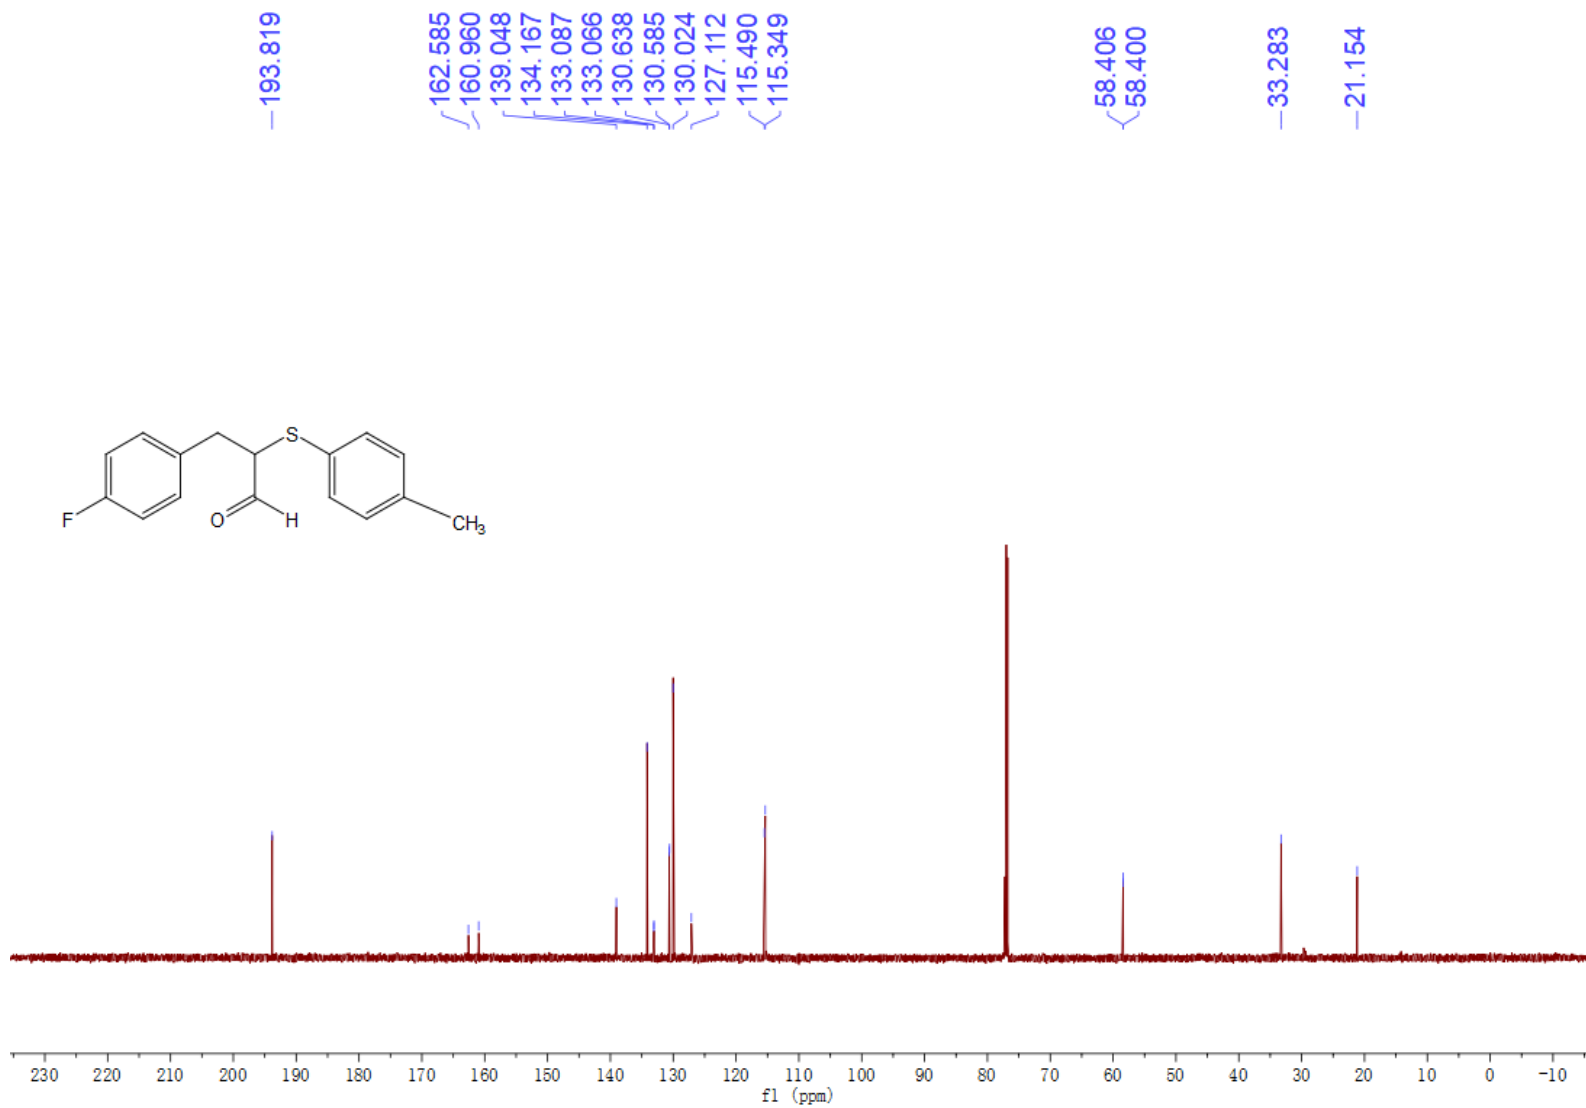



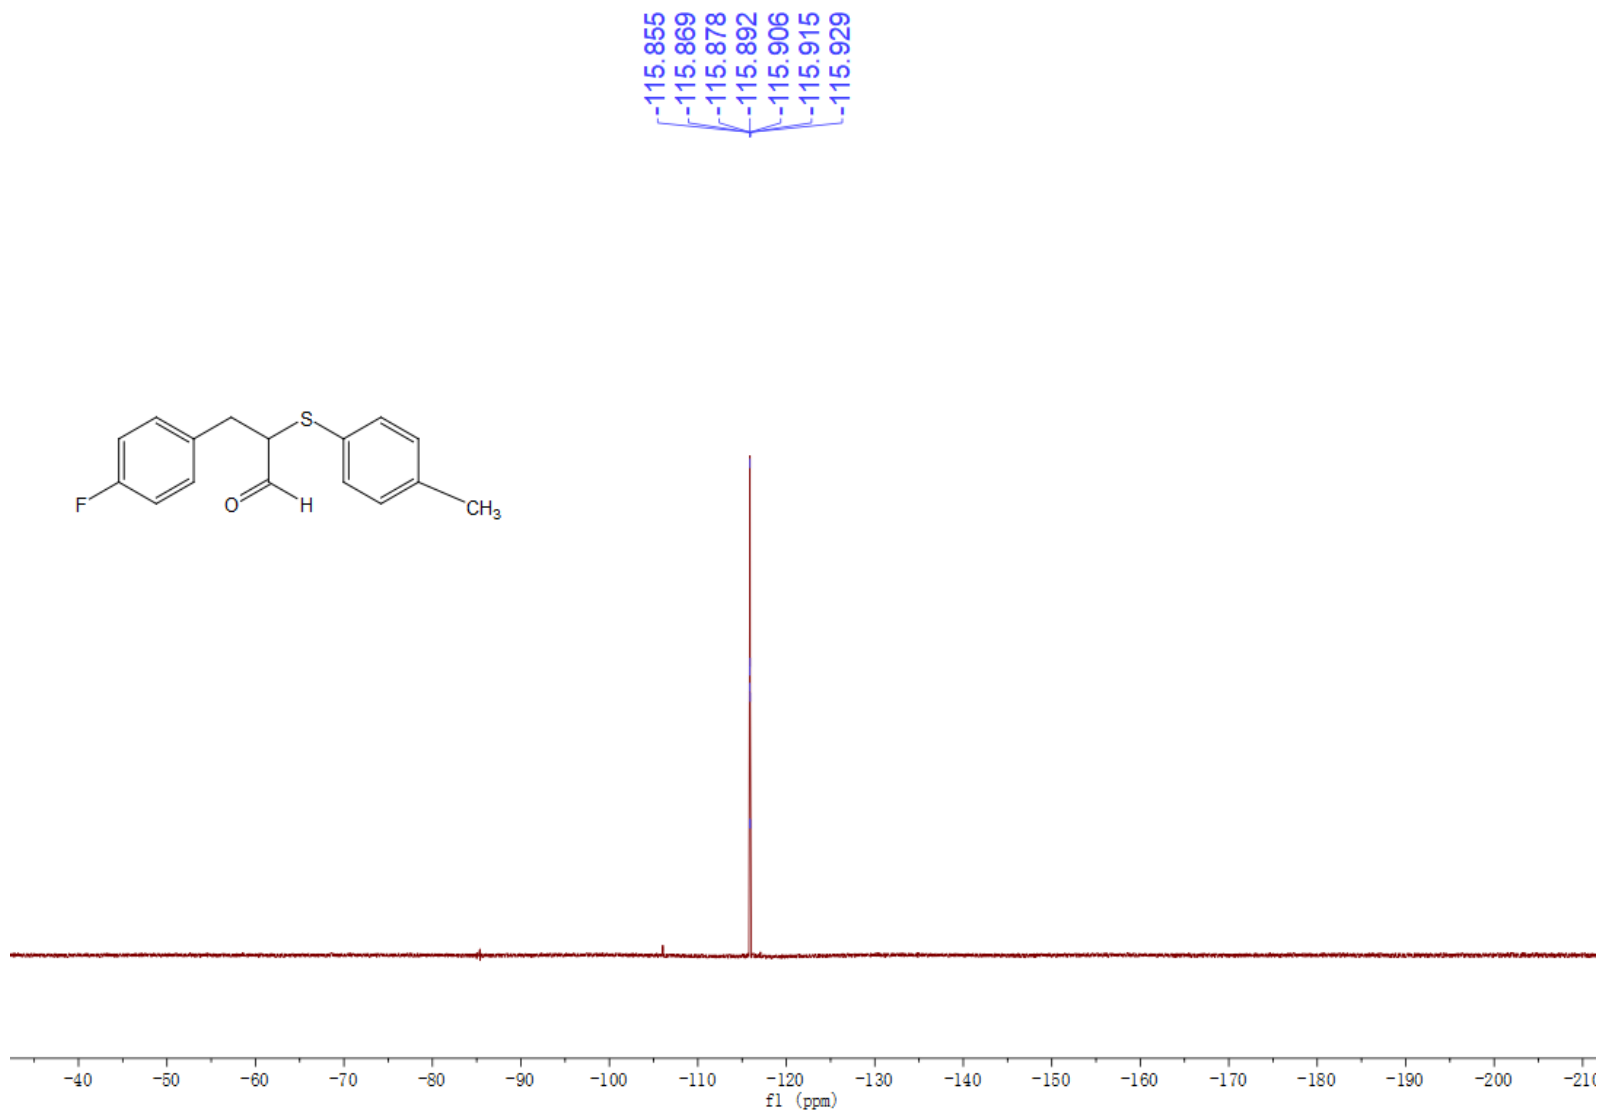

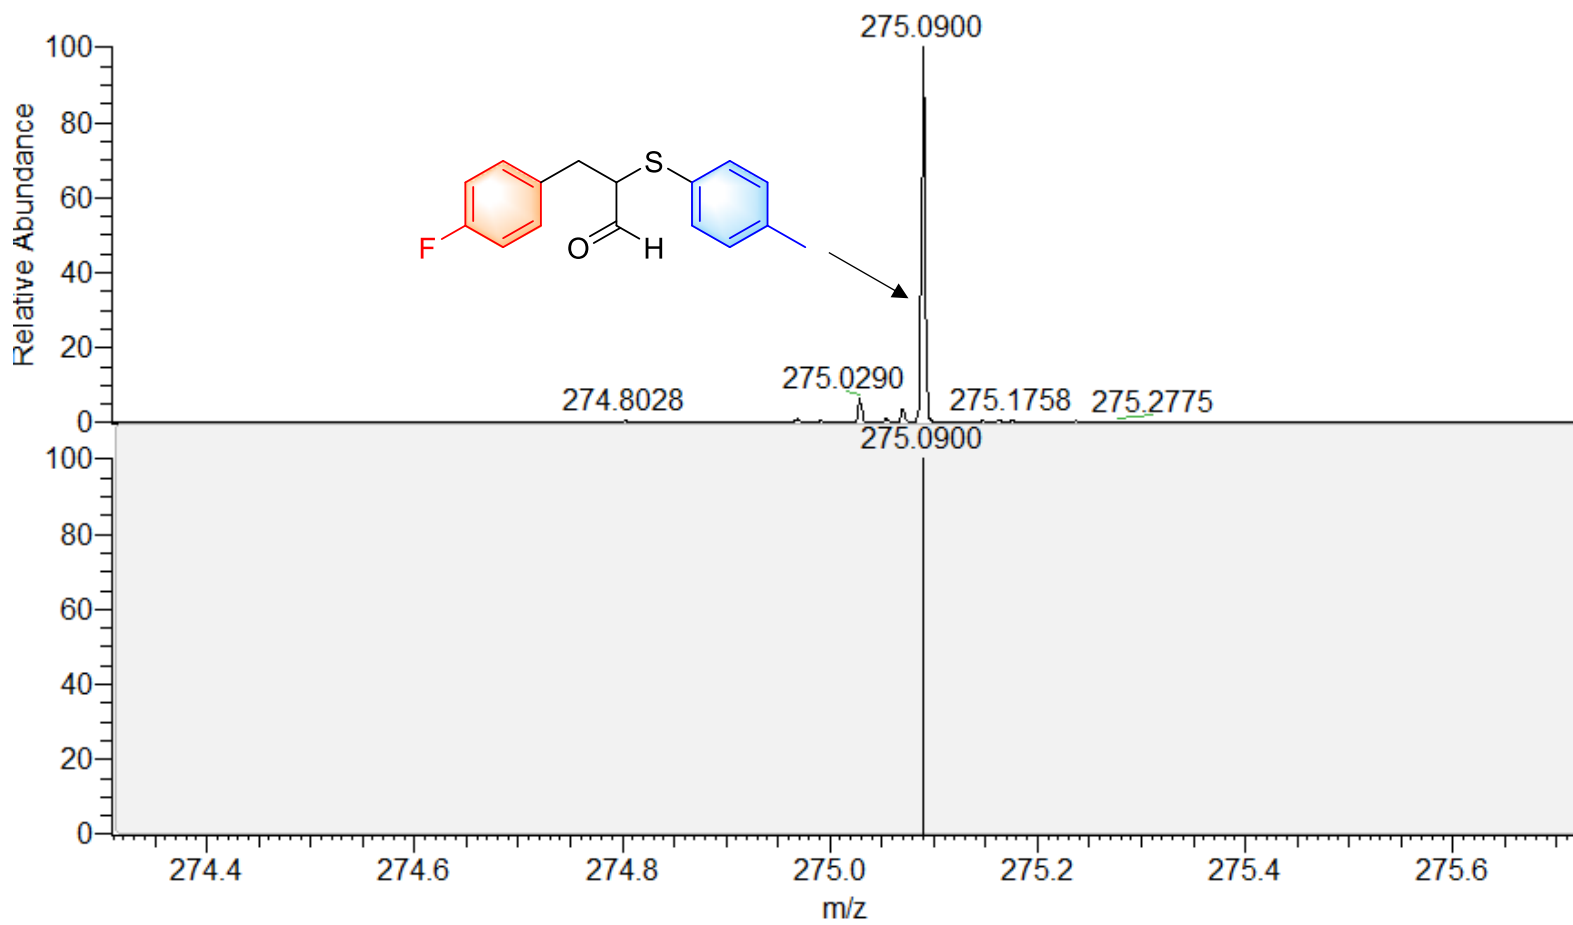

NL:  
5.93E5  
MOUDAN-M8#1  
RT: 0.00 AV: 1 T:  
FTMS + p ESI SIM  
lock ms  
[256.3000-  
286.3000]

NL:  
7.96E5  
C<sub>16</sub> H<sub>15</sub> FOS +H:  
C<sub>16</sub> H<sub>16</sub> F<sub>1</sub> O<sub>1</sub> S<sub>1</sub>  
pa Chrg 1

**3-(4-chlorophenyl)-2-(*p*-tolylthio)propanal (3aj)**

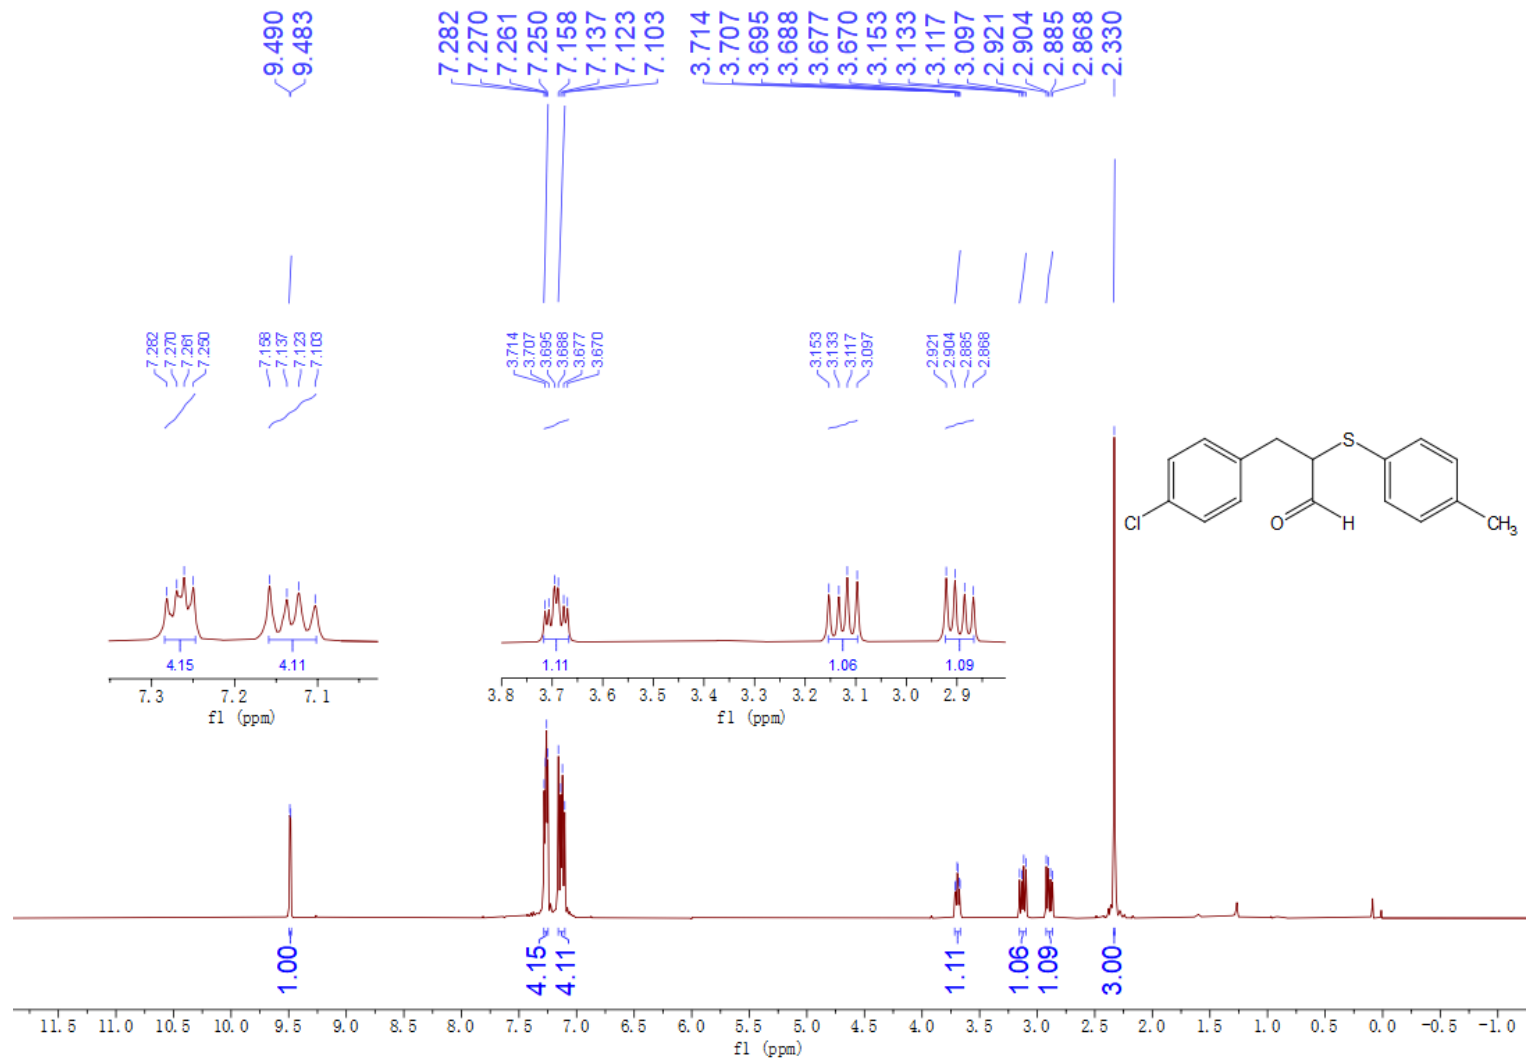

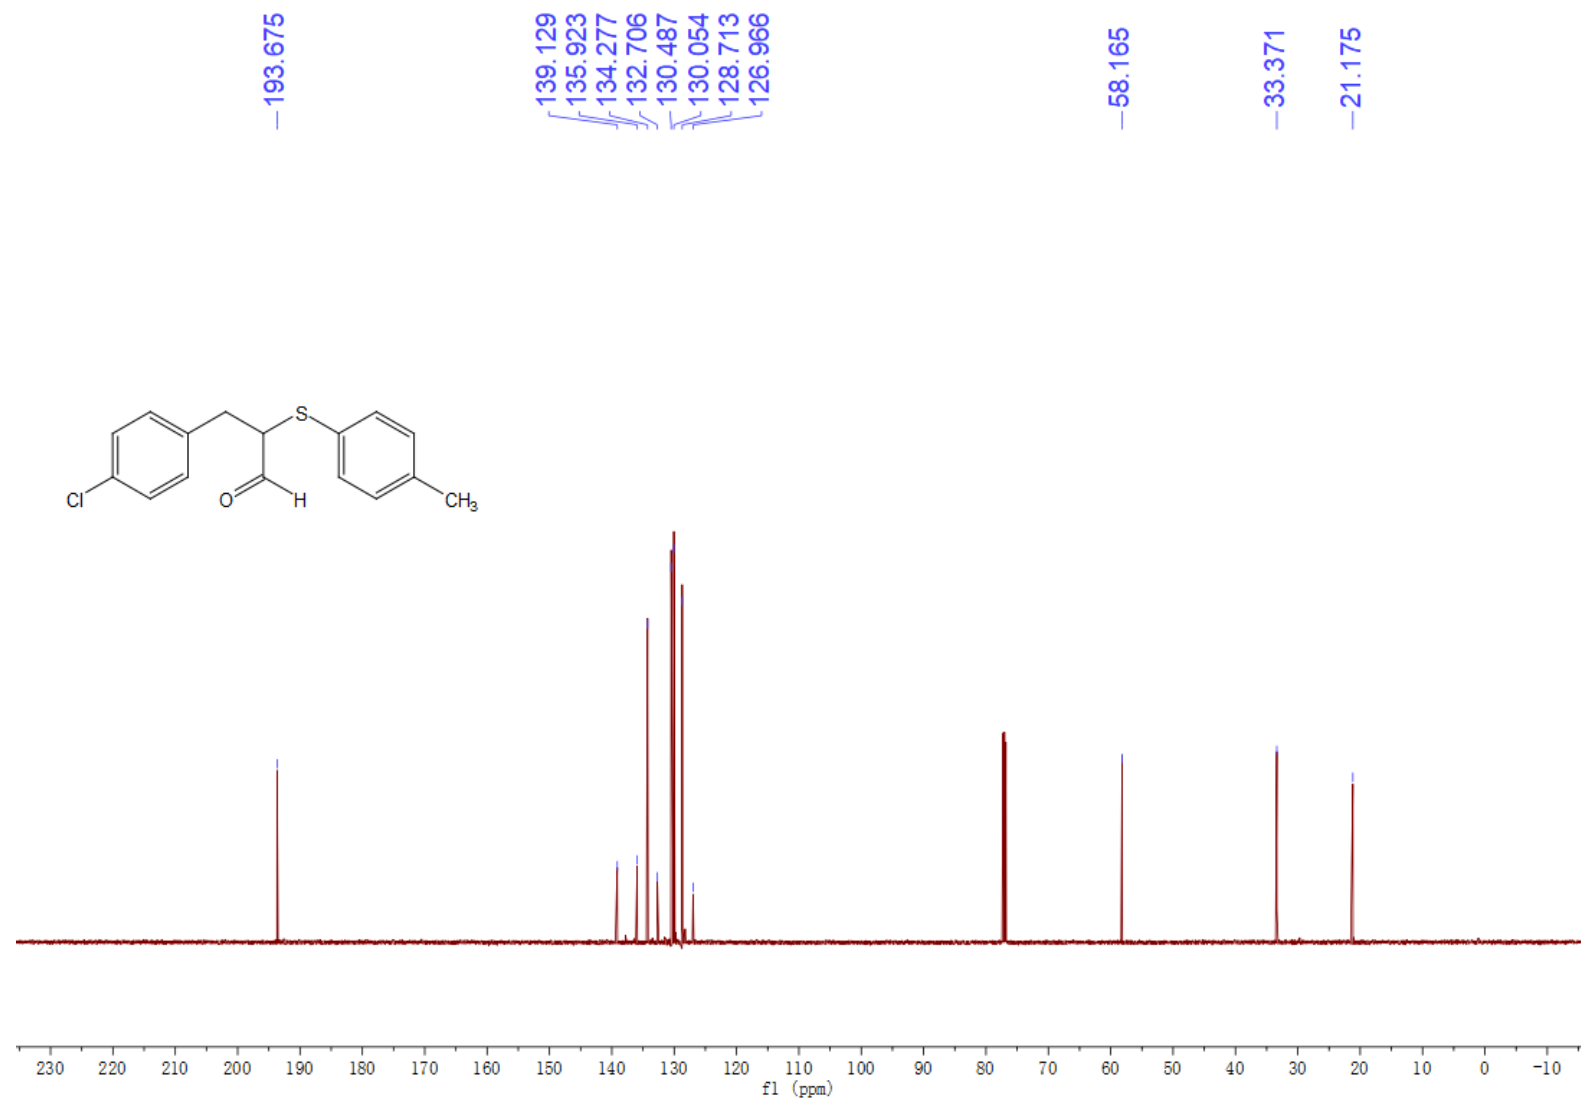

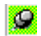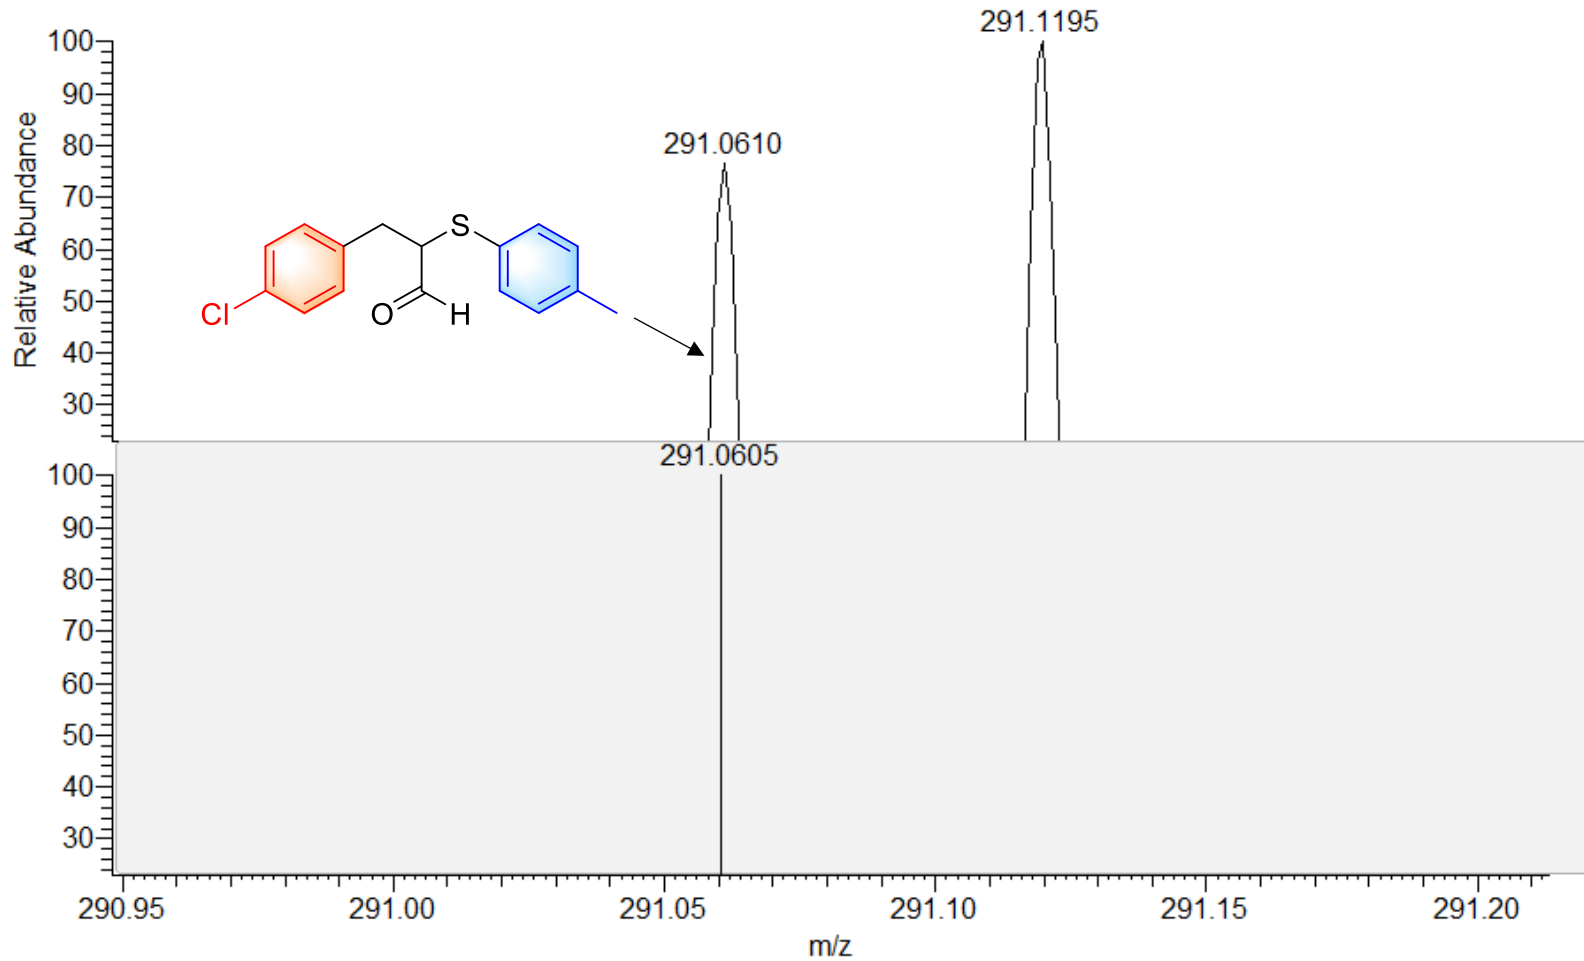

NL:  
6.32E5  
DZHY-MOUDAN-  
M7#6 RT: 0.03 AV:  
1 T: FTMS + p ESI  
Full lock ms  
[60.0000-750.0000]

NL:  
6.03E5  
C<sub>16</sub> H<sub>15</sub> ClOS +H:  
C<sub>16</sub> H<sub>16</sub> Cl<sub>1</sub> O<sub>1</sub> S<sub>1</sub>  
pa Chrg 1

### 3-(4-bromophenyl)-2-(*p*-tolylthio)propanal (3ak)

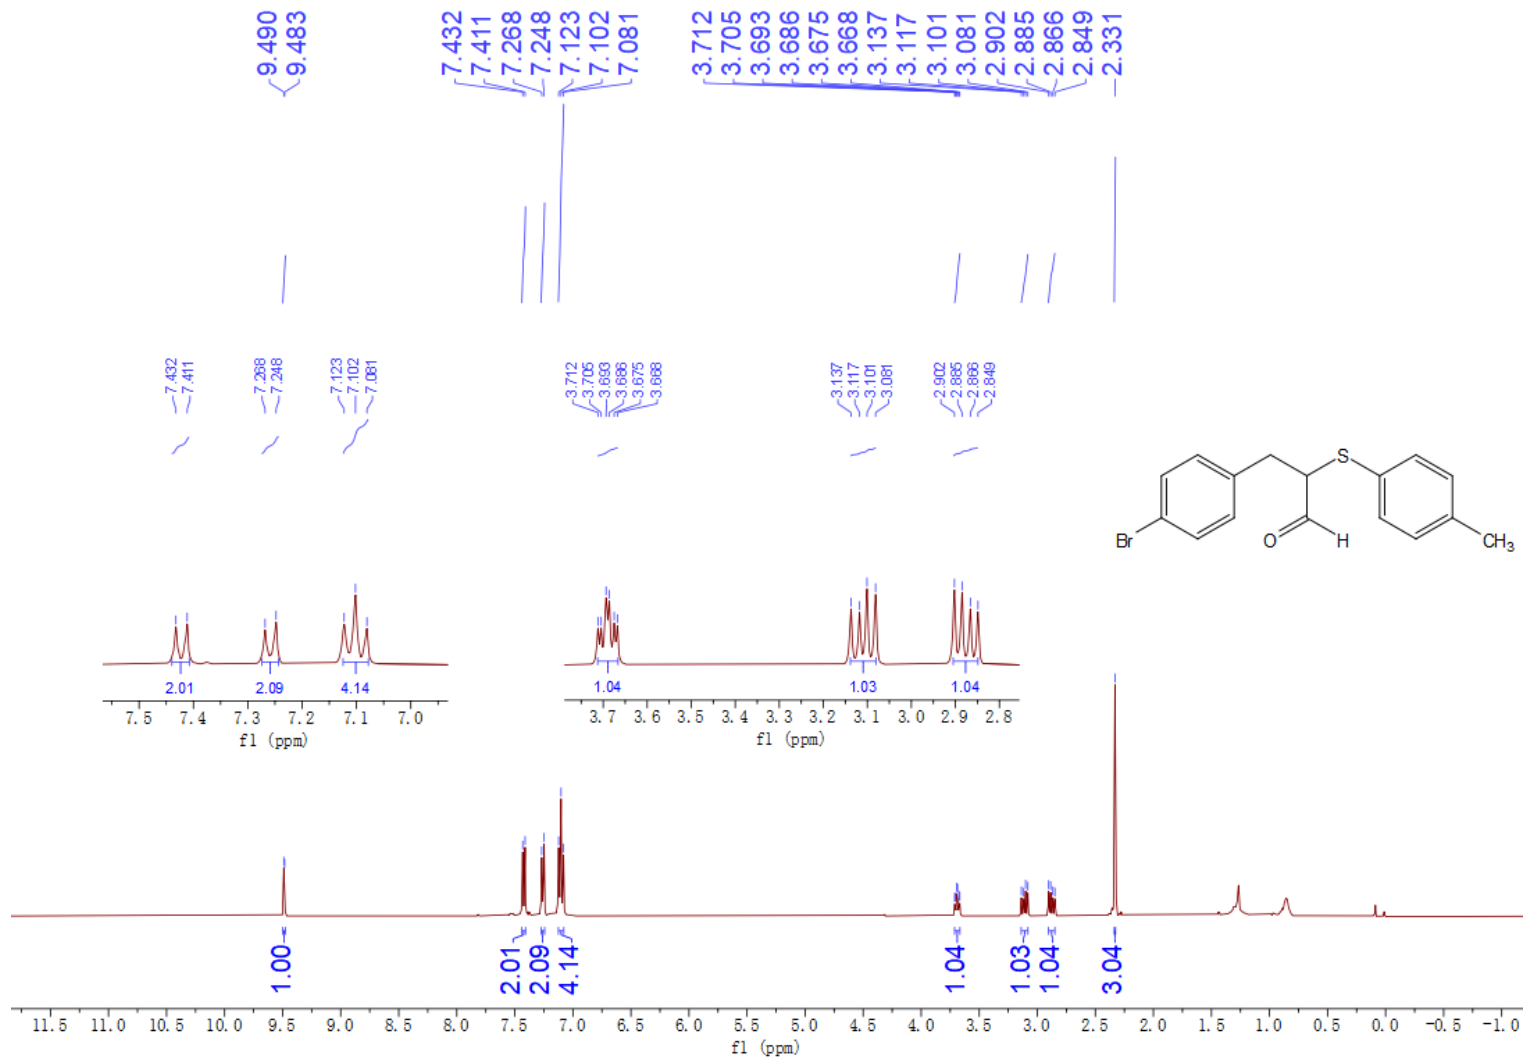

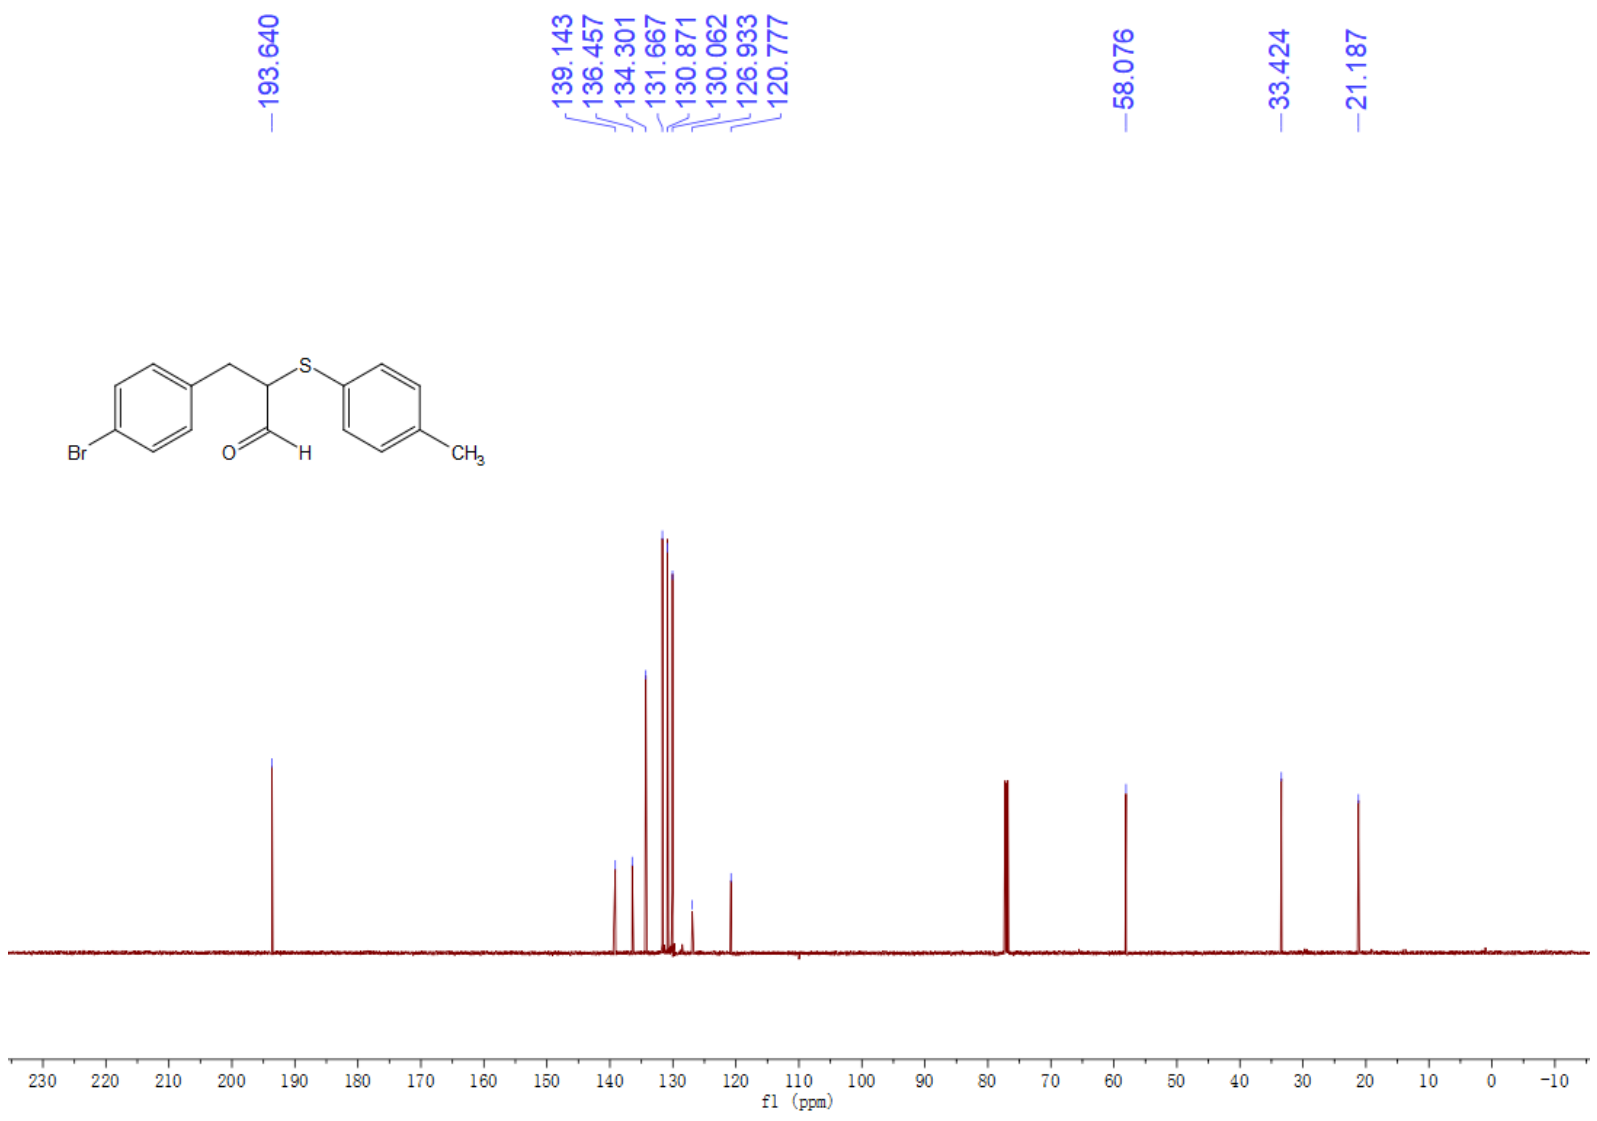

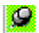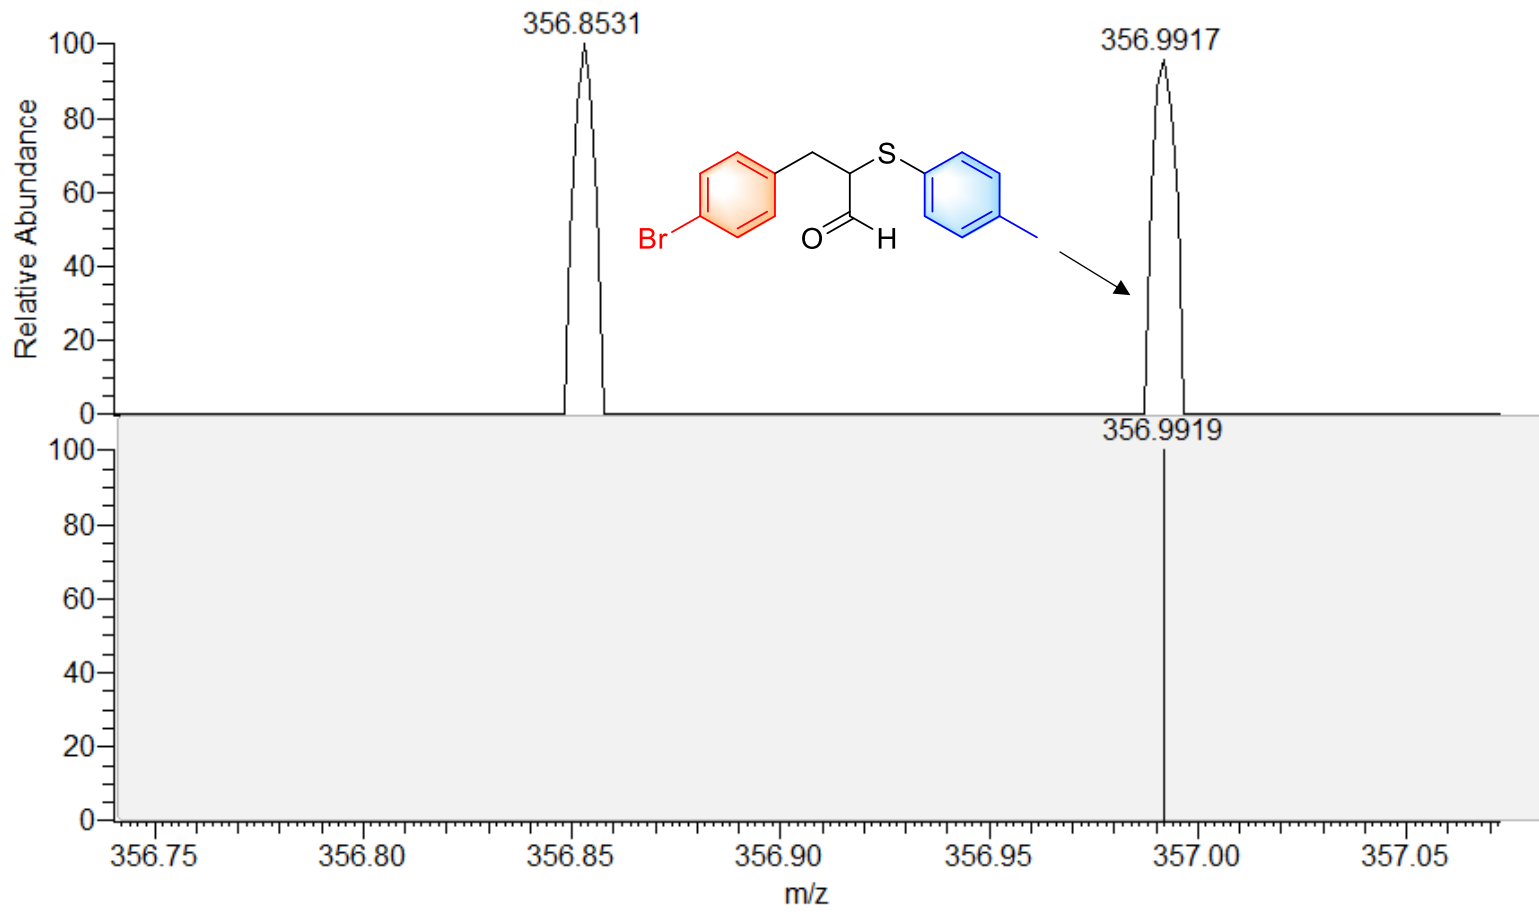

NL:  
3.82E5  
DZHY-MOUDAN-M7#29  
RT: 0.13 AV: 1 T:  
FTMS + p ESI Full lock  
ms [60.0000-750.0000]

NL:  
4.03E5  
C<sub>16</sub> H<sub>15</sub> BrOS +Na:  
C<sub>16</sub> H<sub>15</sub> Br<sub>1</sub> O<sub>1</sub> S<sub>1</sub> Na<sub>1</sub>  
pa Chrg 1



**2-(*p*-tolylthio)-3-(4-(trifluoromethyl)phenyl)propanal (3a)**

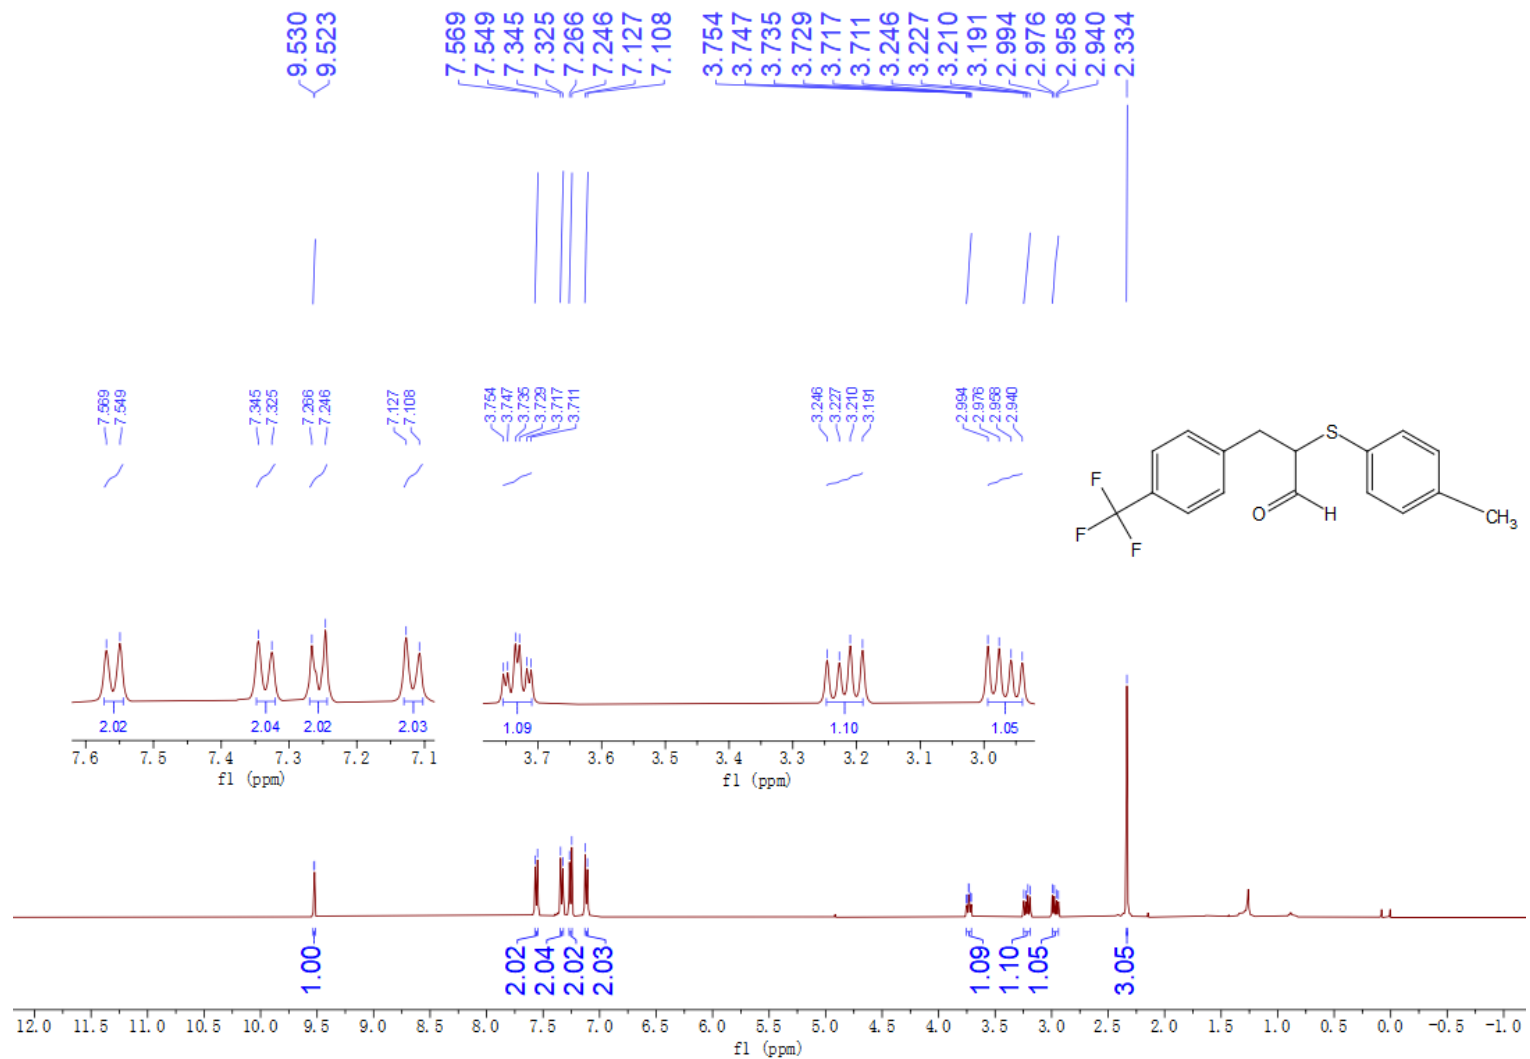

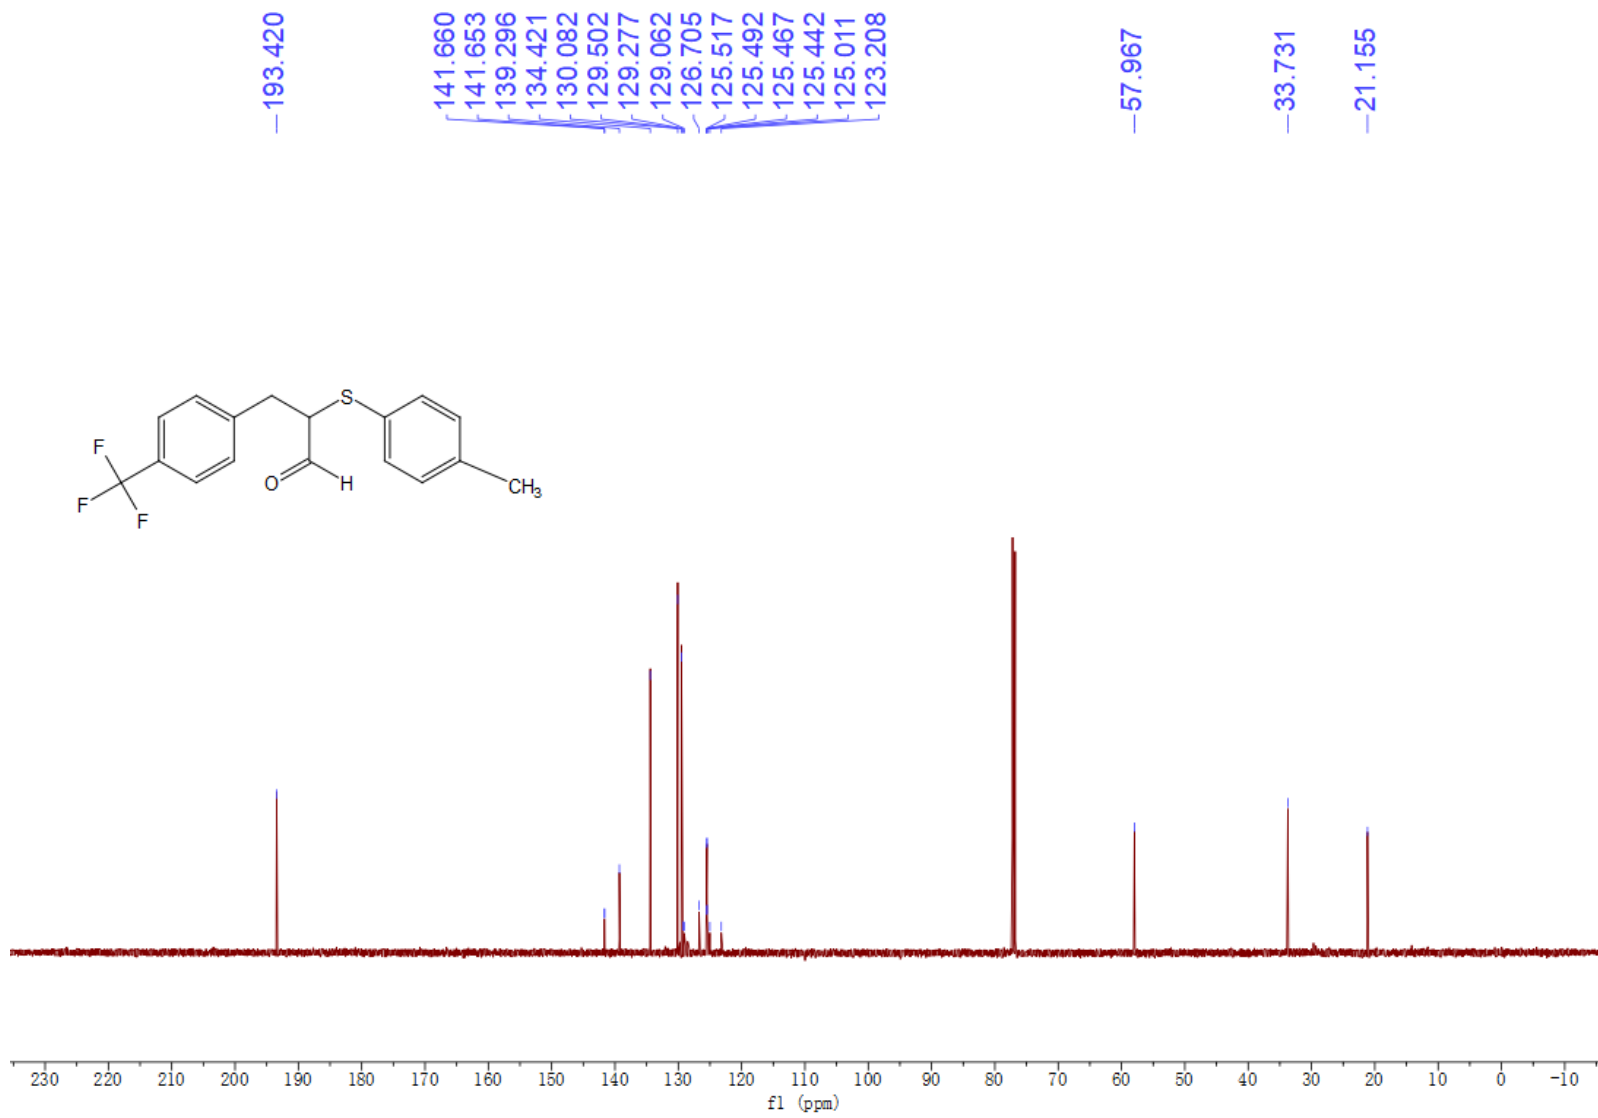

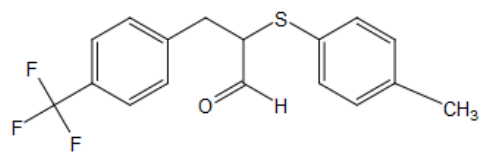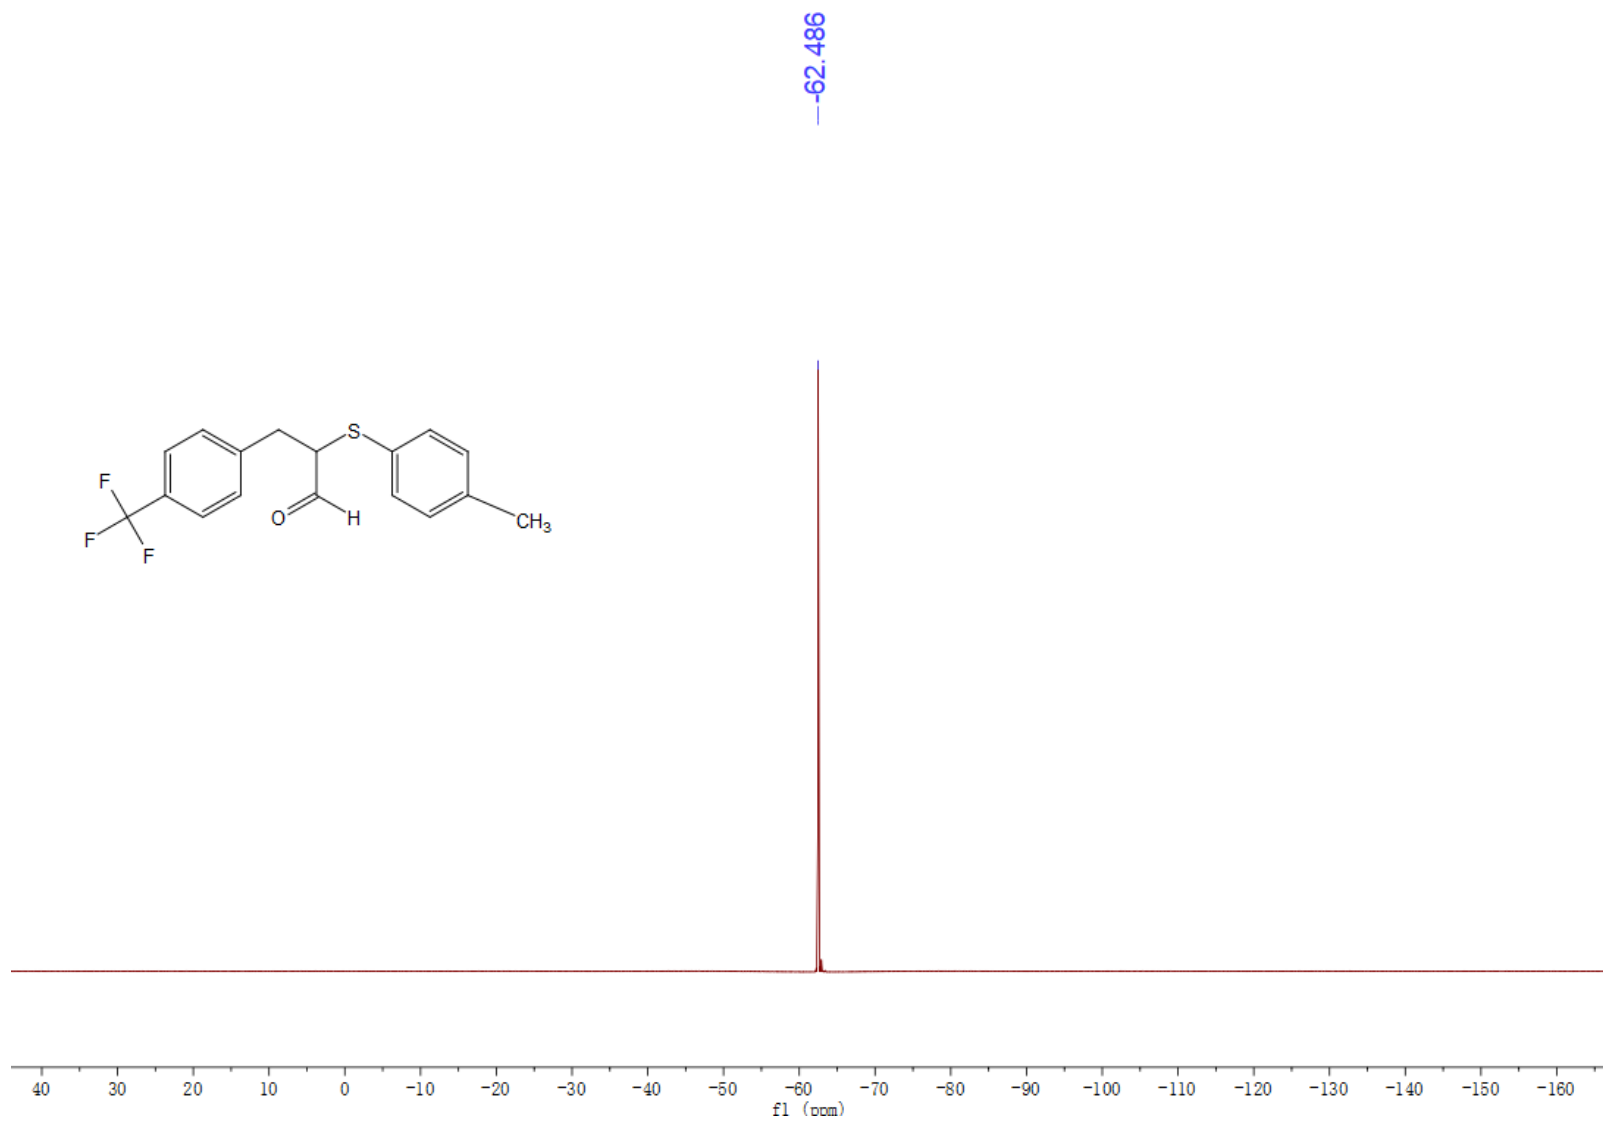

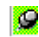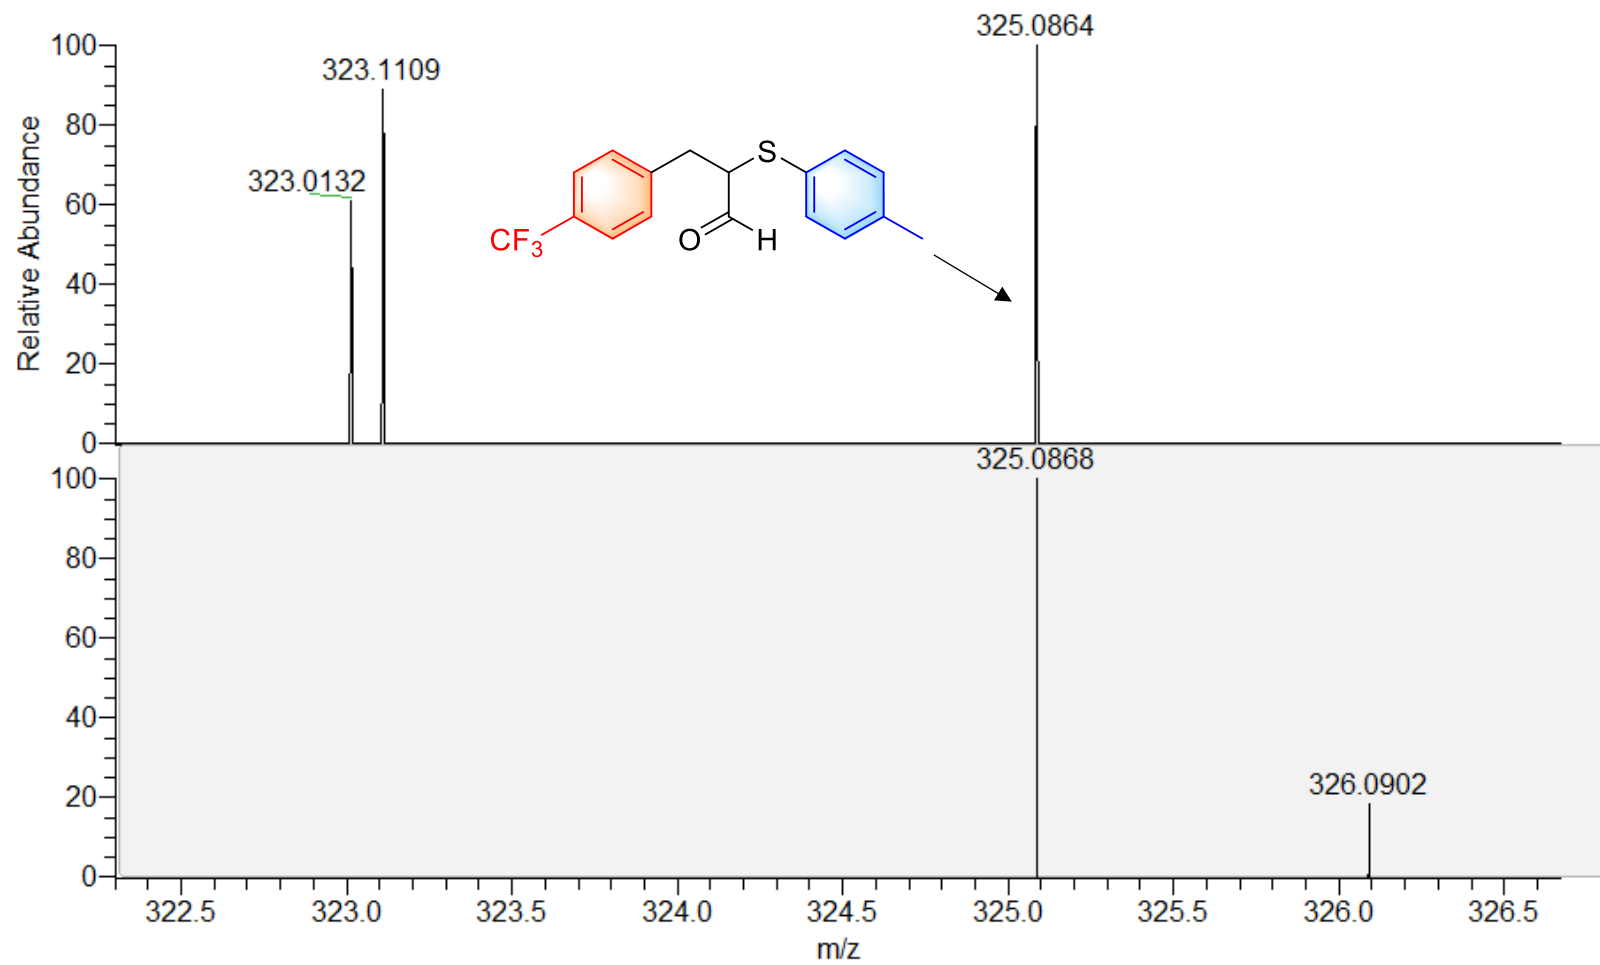

NL:  
2.00E5  
MOUDAN-M8#39  
RT: 0.17 AV: 1 T:  
FTMS + p ESI Full  
lock ms  
[75.0000-750.0000]

NL:  
7.87E5  
C<sub>17</sub> H<sub>15</sub> F<sub>3</sub> OS +H:  
C<sub>17</sub> H<sub>16</sub> F<sub>3</sub> O<sub>1</sub> S<sub>1</sub>  
pa Chrg 1

4-(3-oxo-2-(*p*-tolylthio)propyl)benzonitrile (3am)

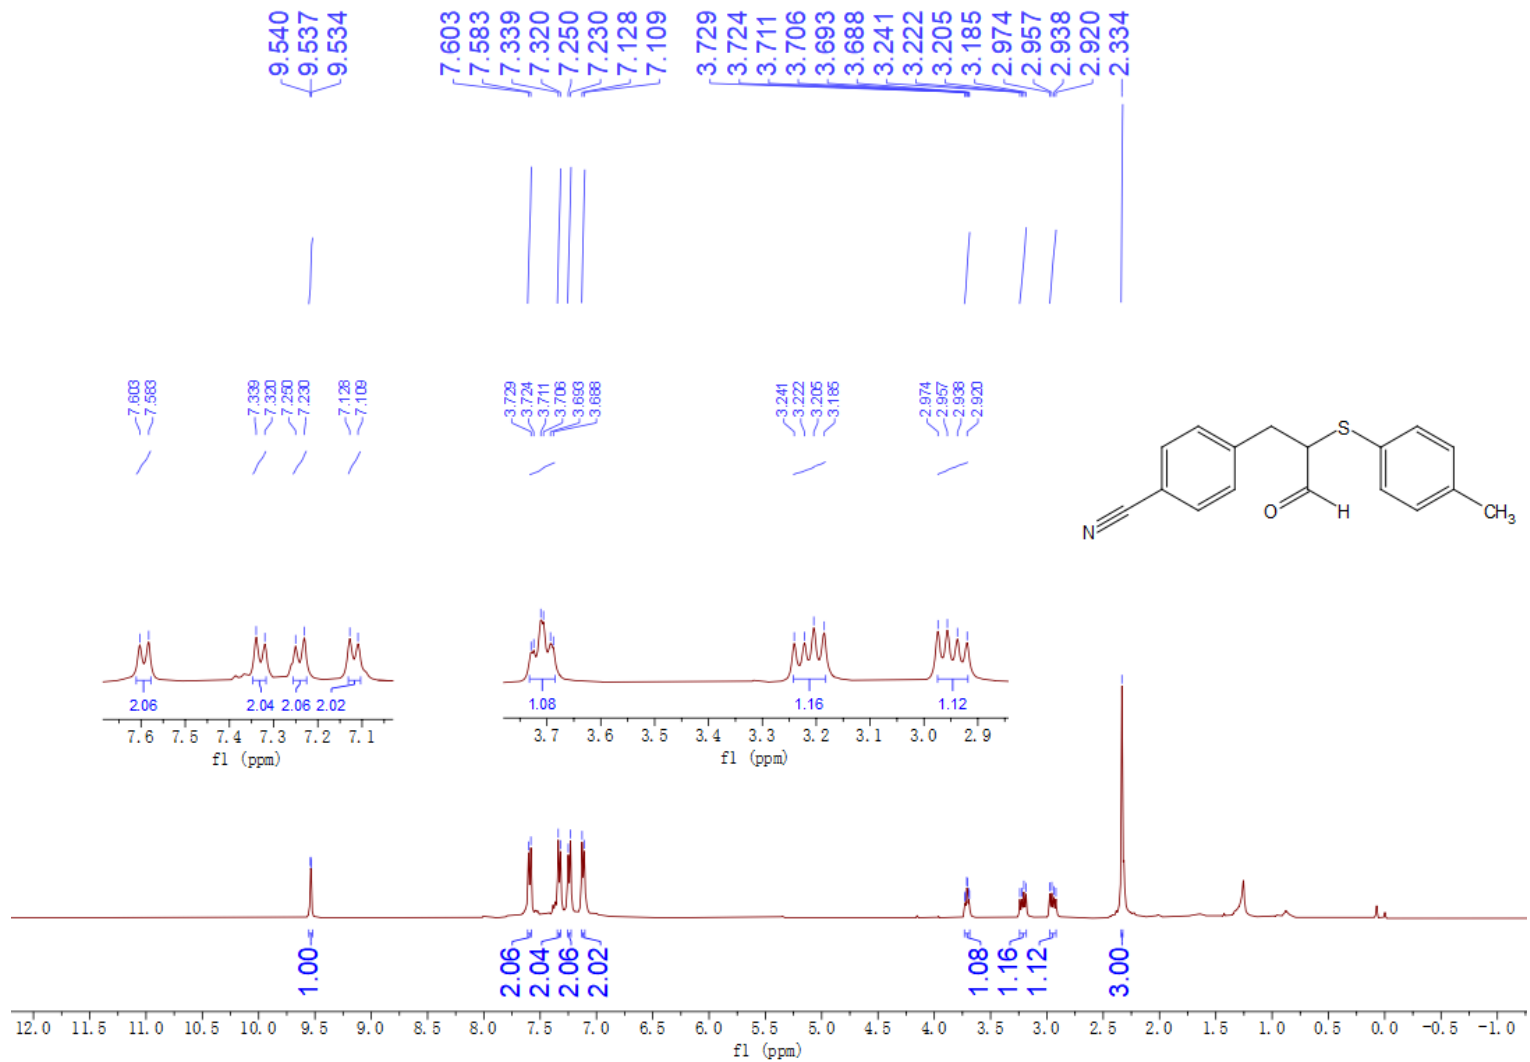

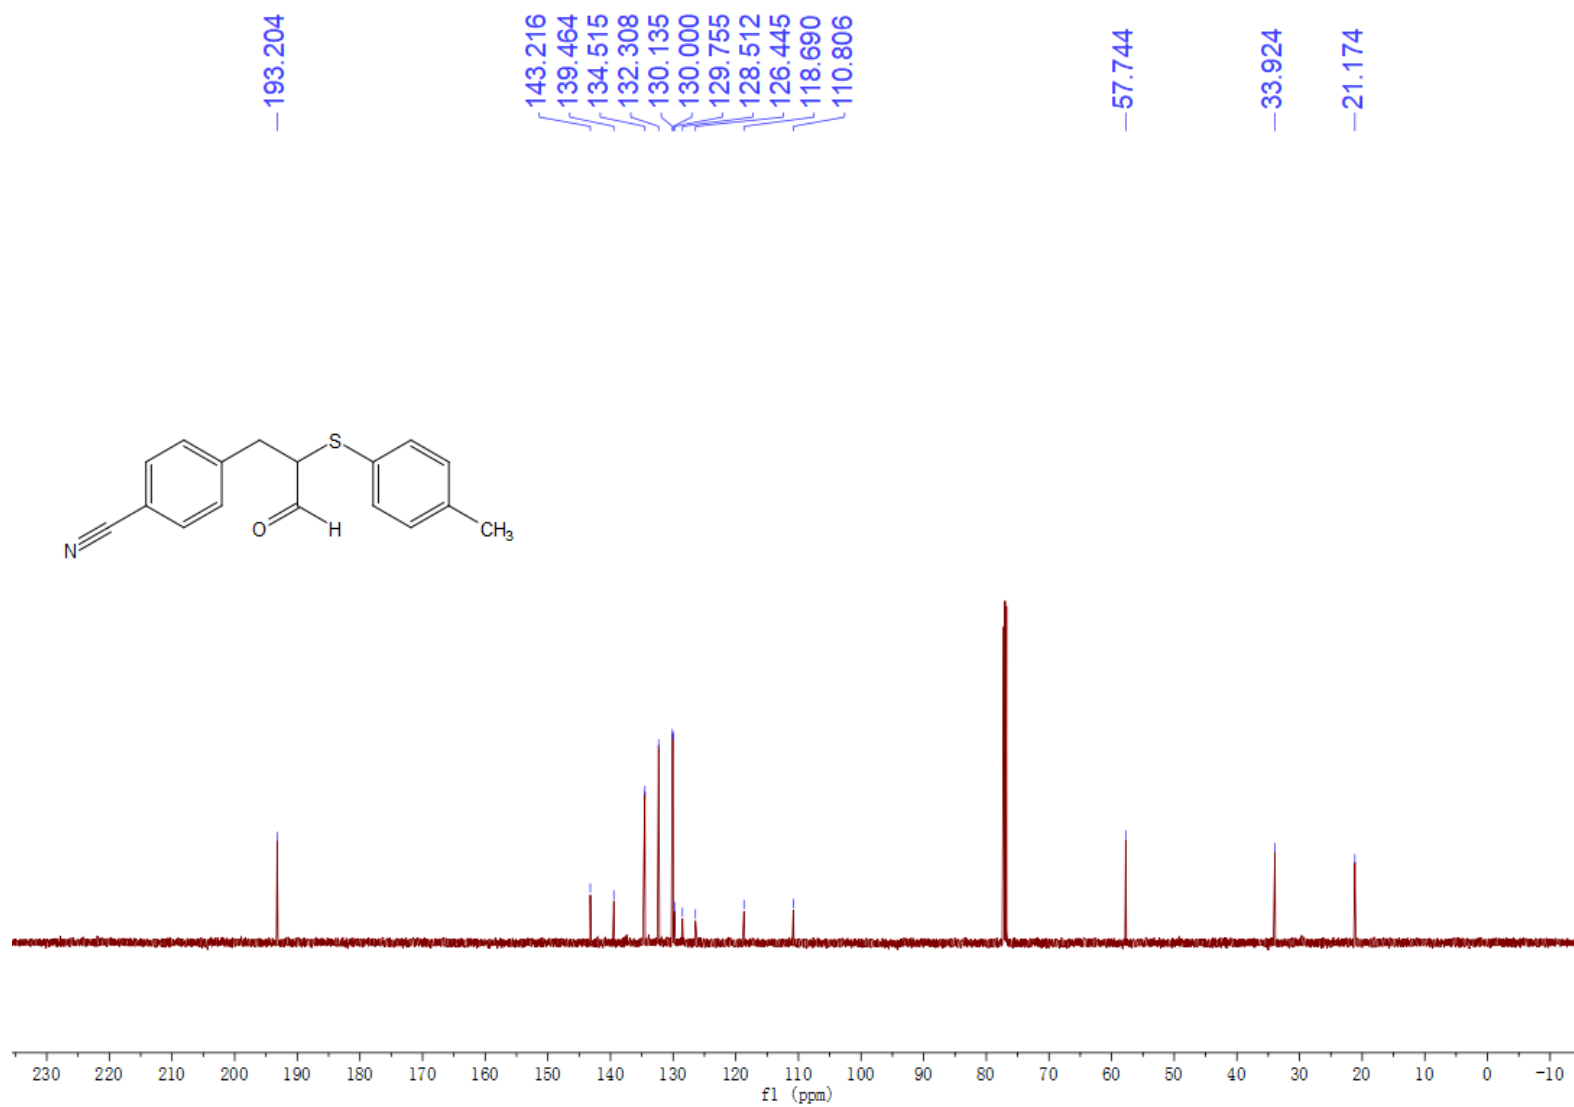

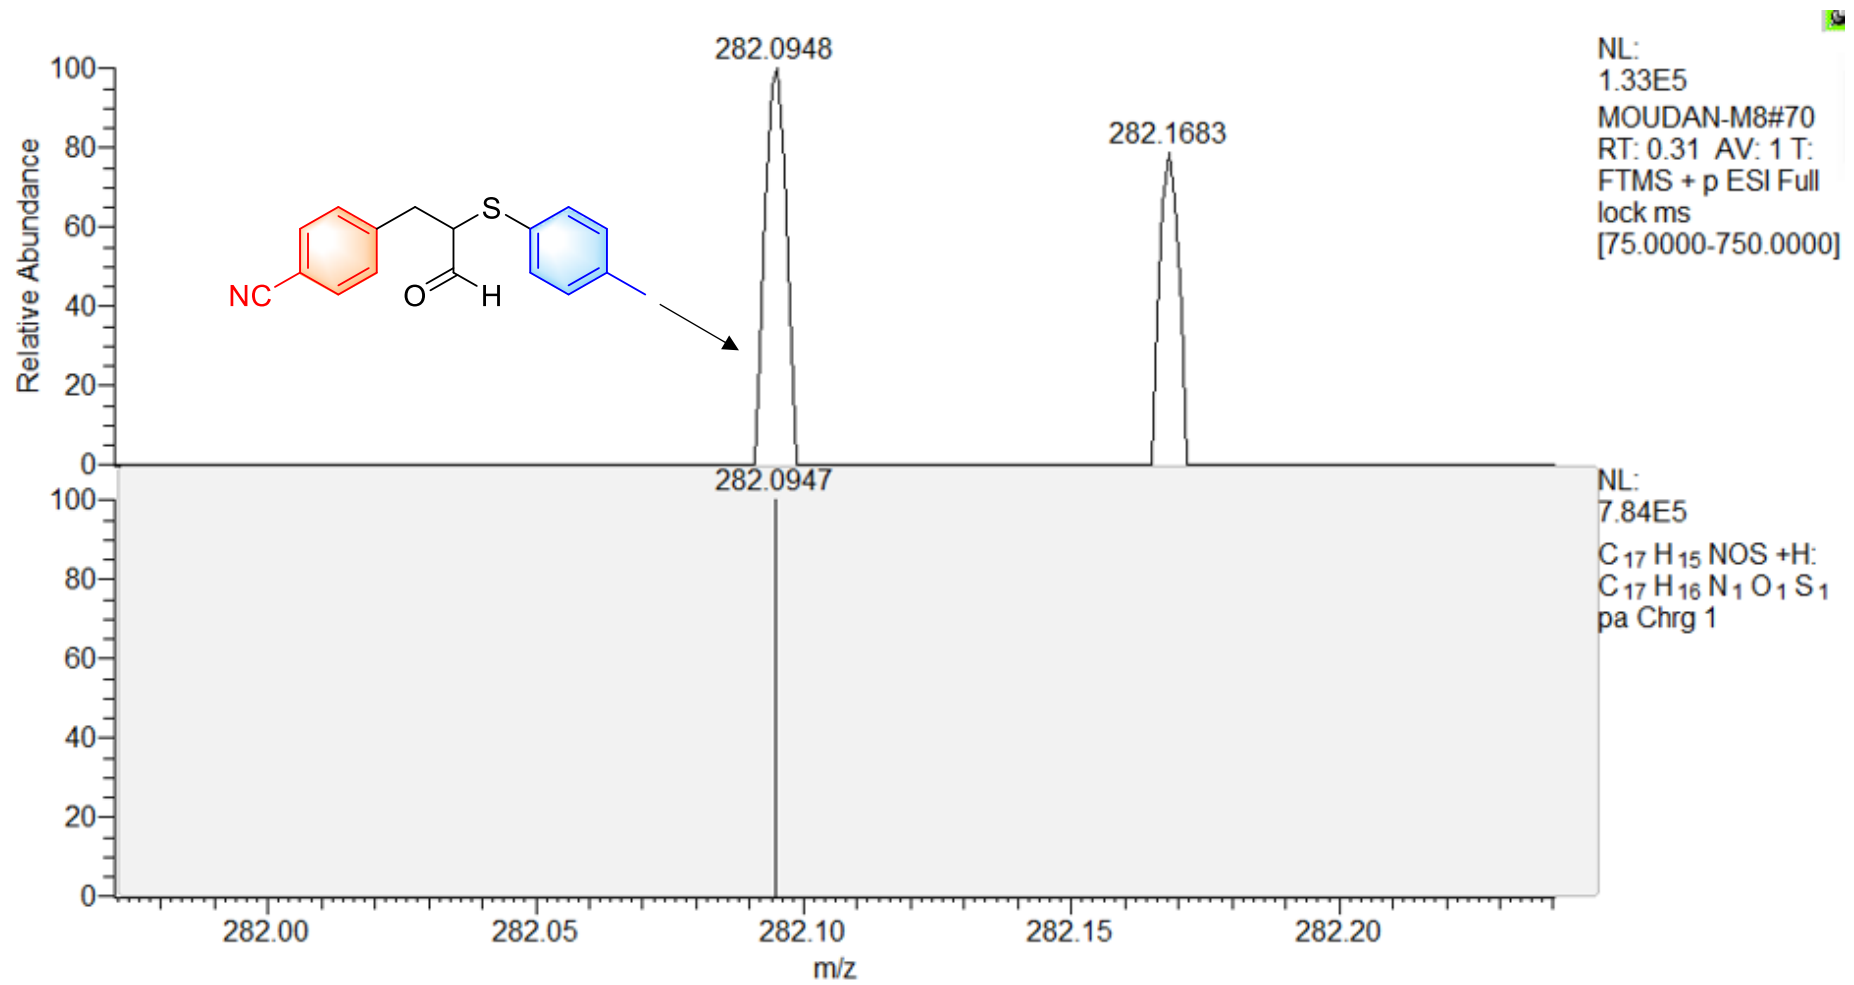

3-(2-fluorophenyl)-2-(*p*-tolylthio)propanal (3an)

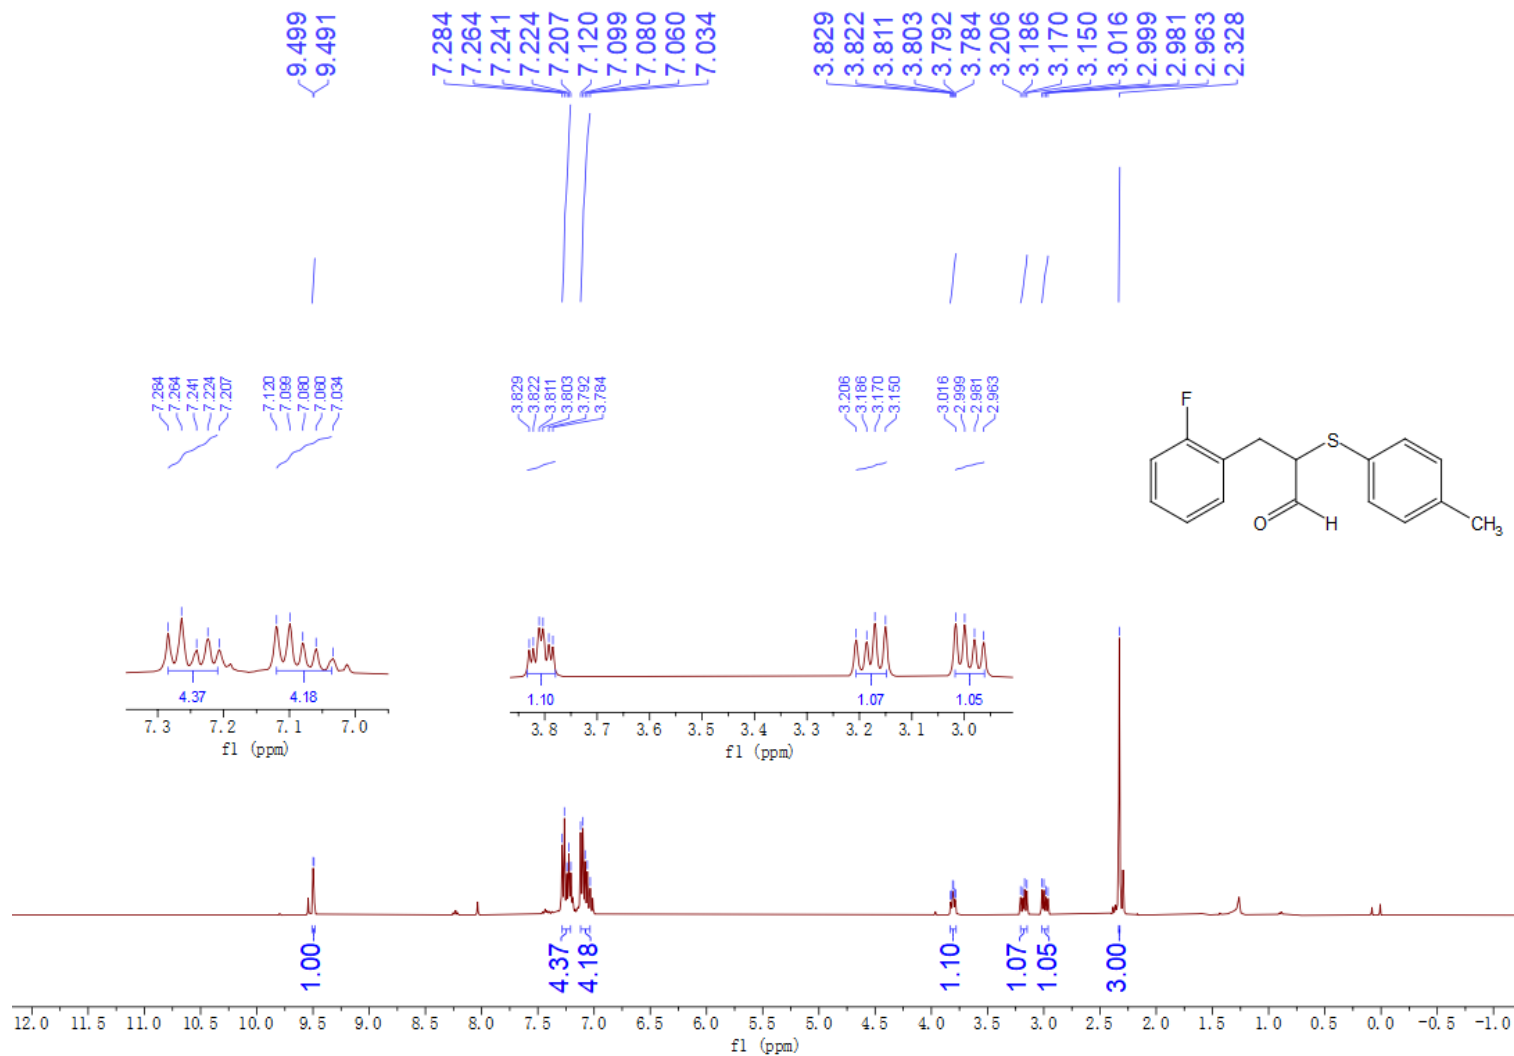



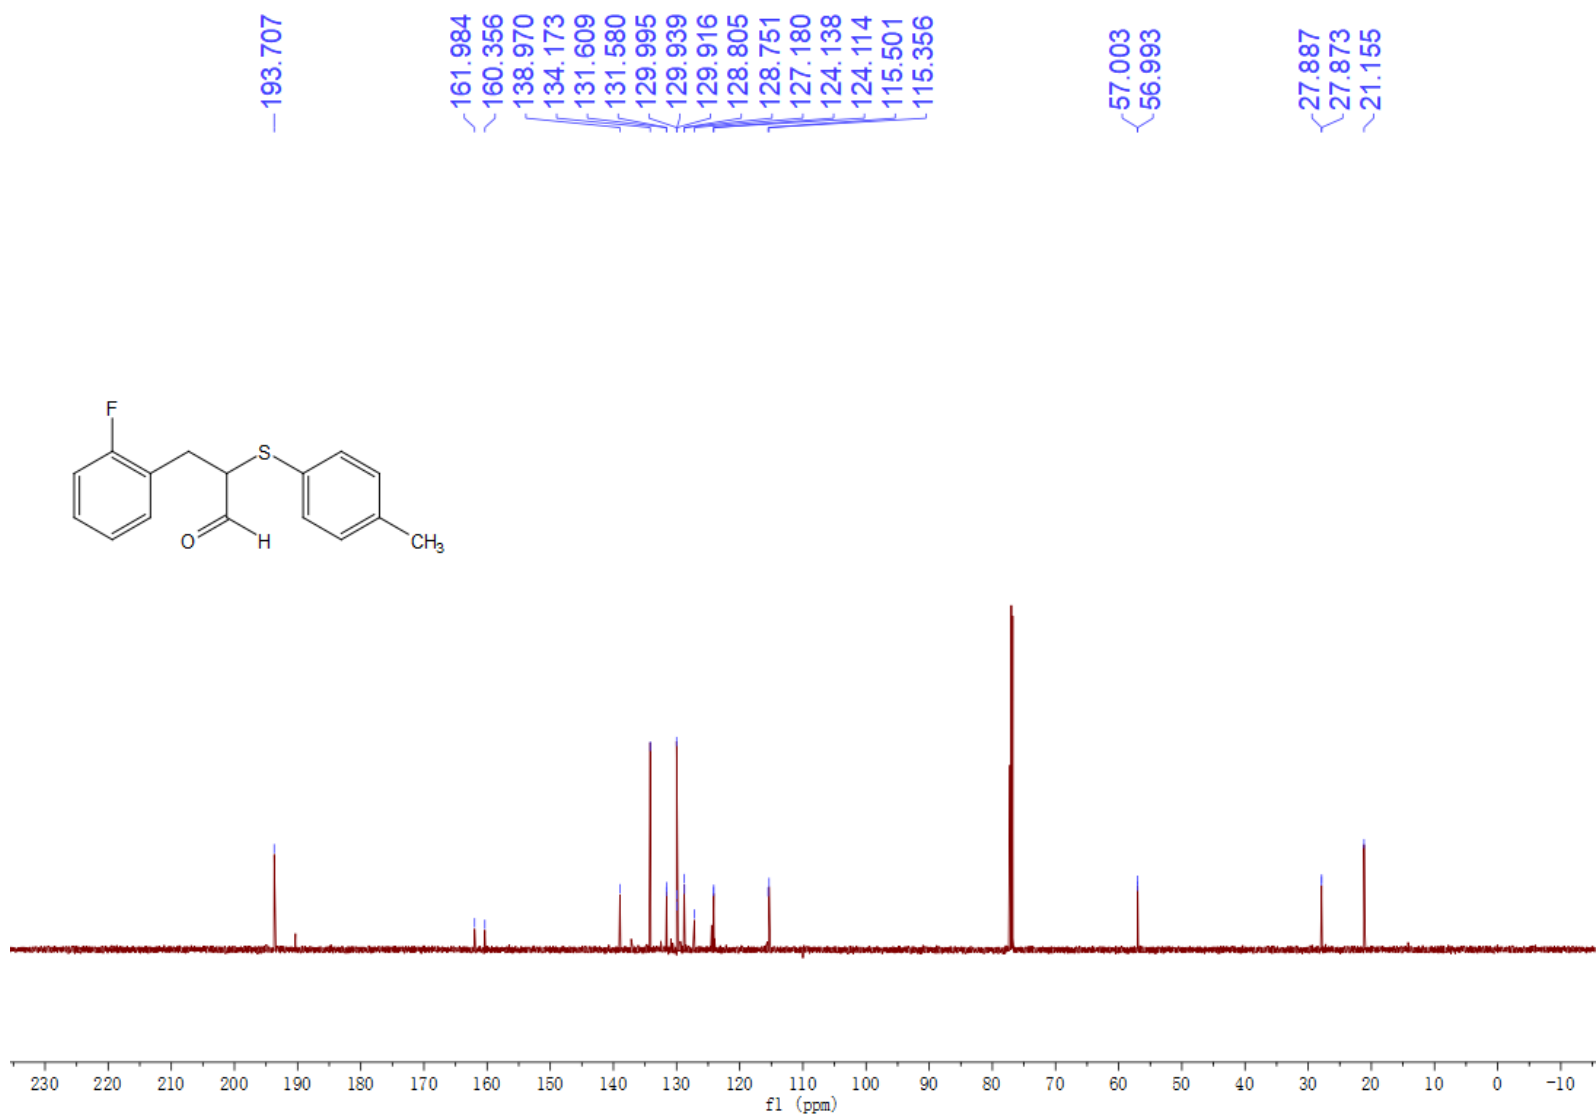

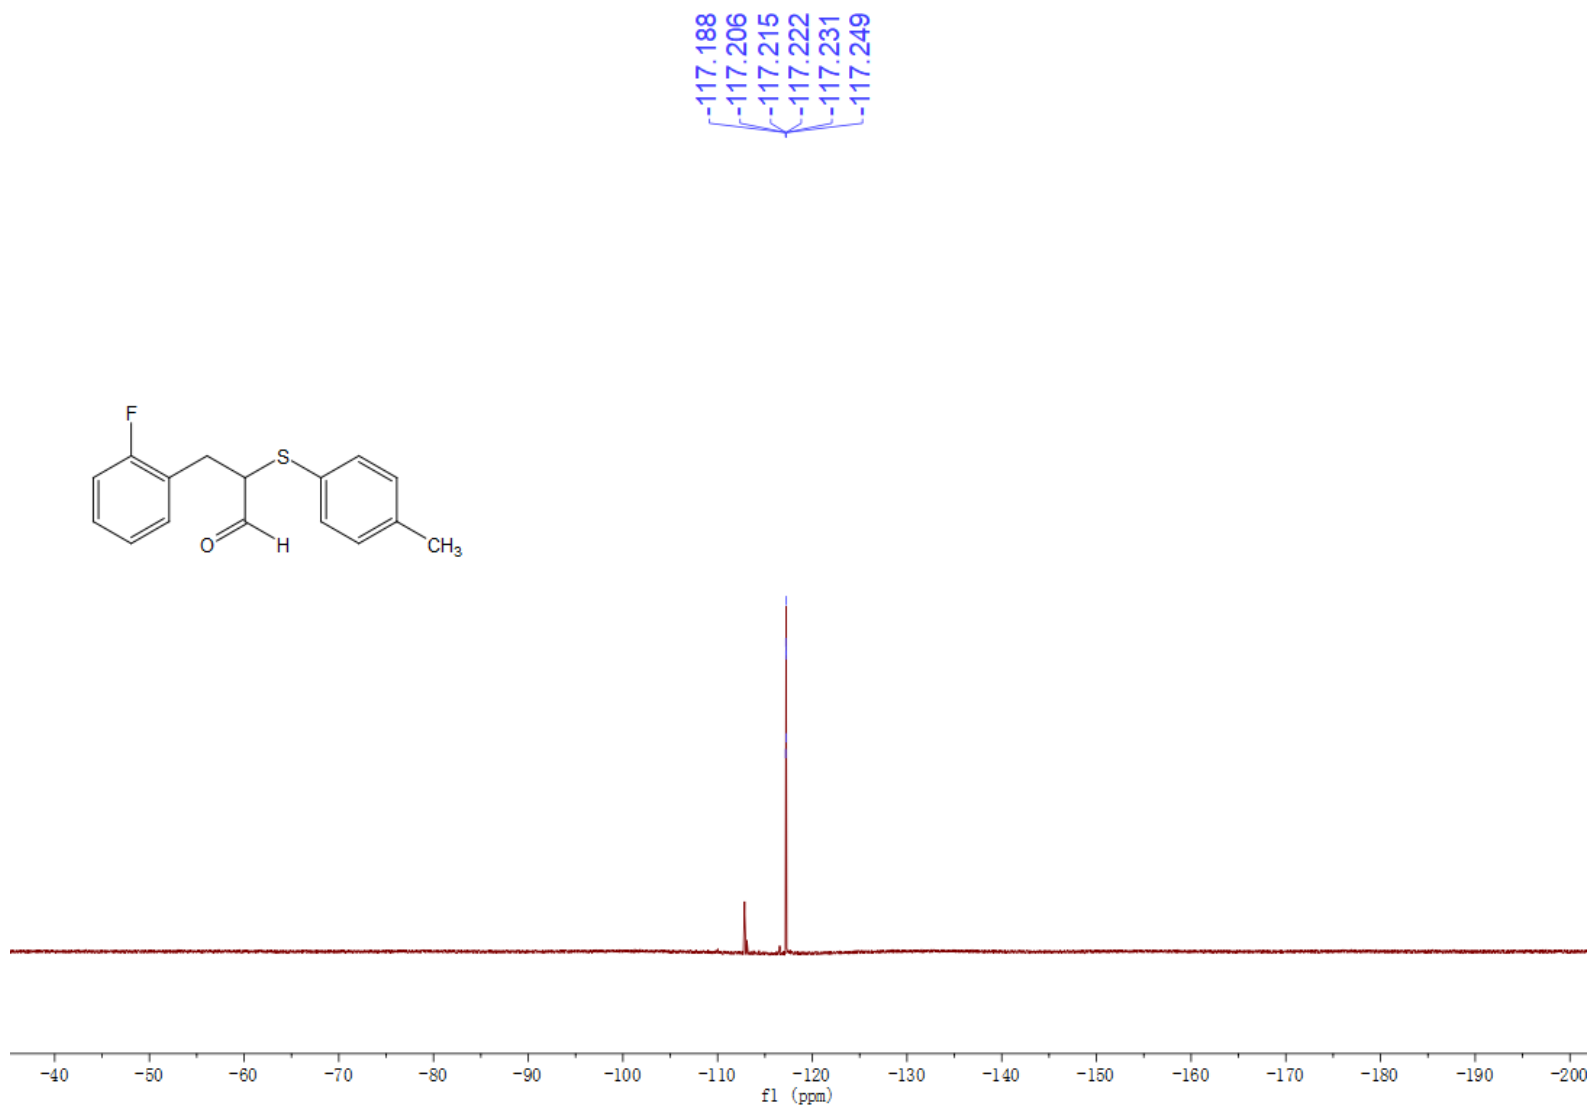

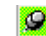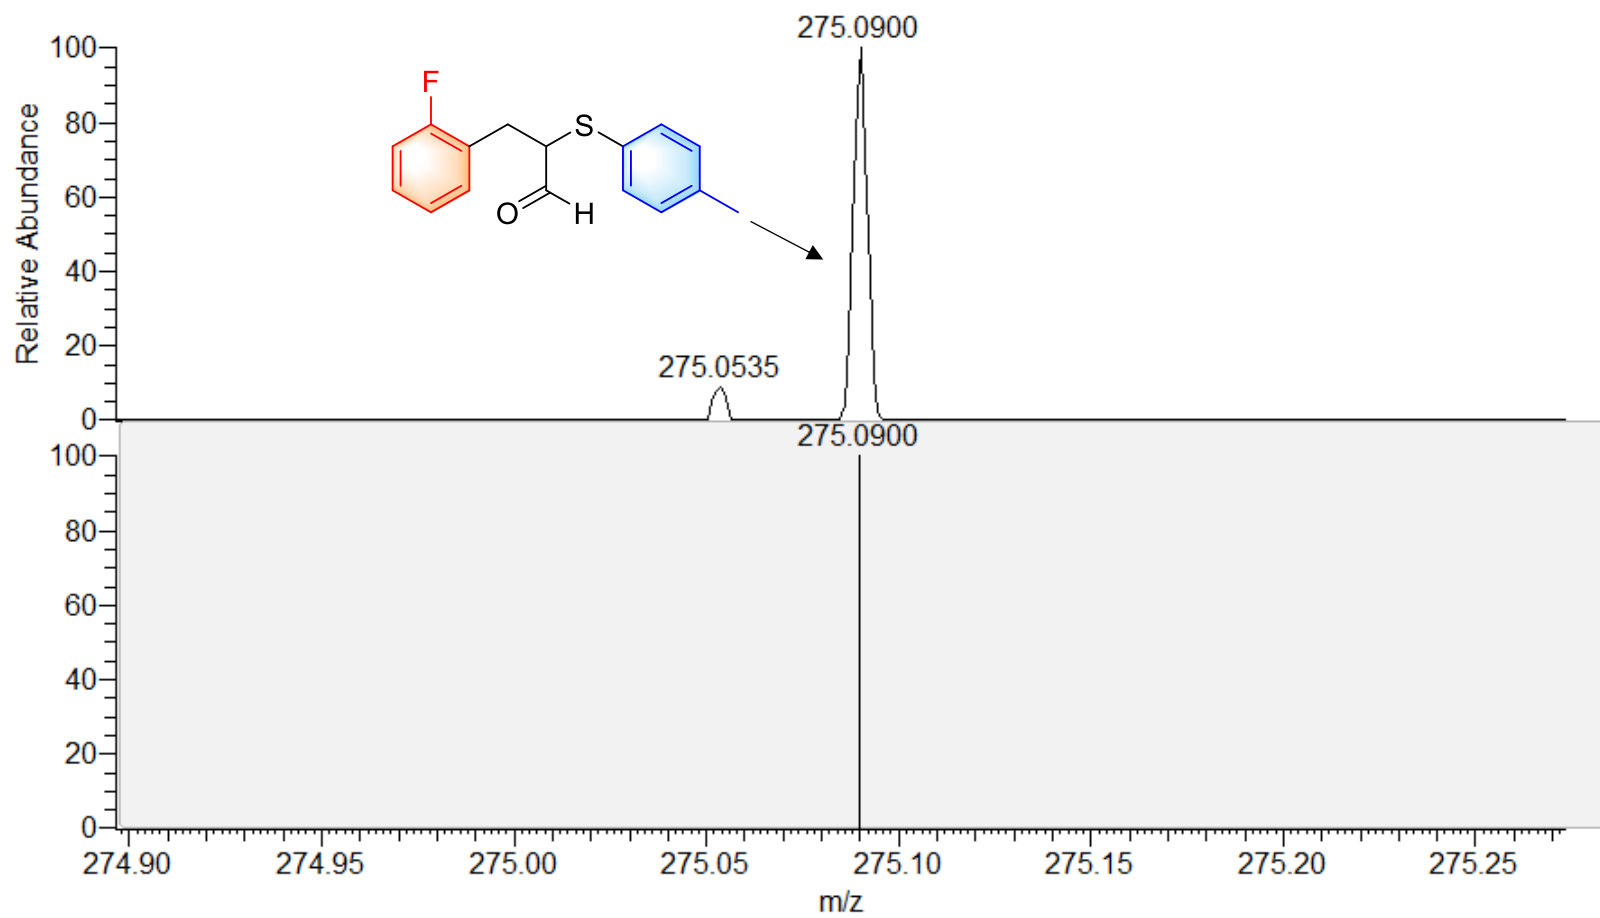

NL:  
1.64E6  
MOUDAN-M8#36  
RT: 0.16 AV: 1 T:  
FTMS + p ESI Full  
lock ms  
[75.0000-750.0000]

NL:  
7.96E5  
C<sub>16</sub> H<sub>15</sub> FOS +H:  
C<sub>16</sub> H<sub>16</sub> F<sub>1</sub> O<sub>1</sub> S<sub>1</sub>  
pa Chrg 1

**3-(2-chlorophenyl)-2-(*p*-tolylthio)propanal (3ao)**

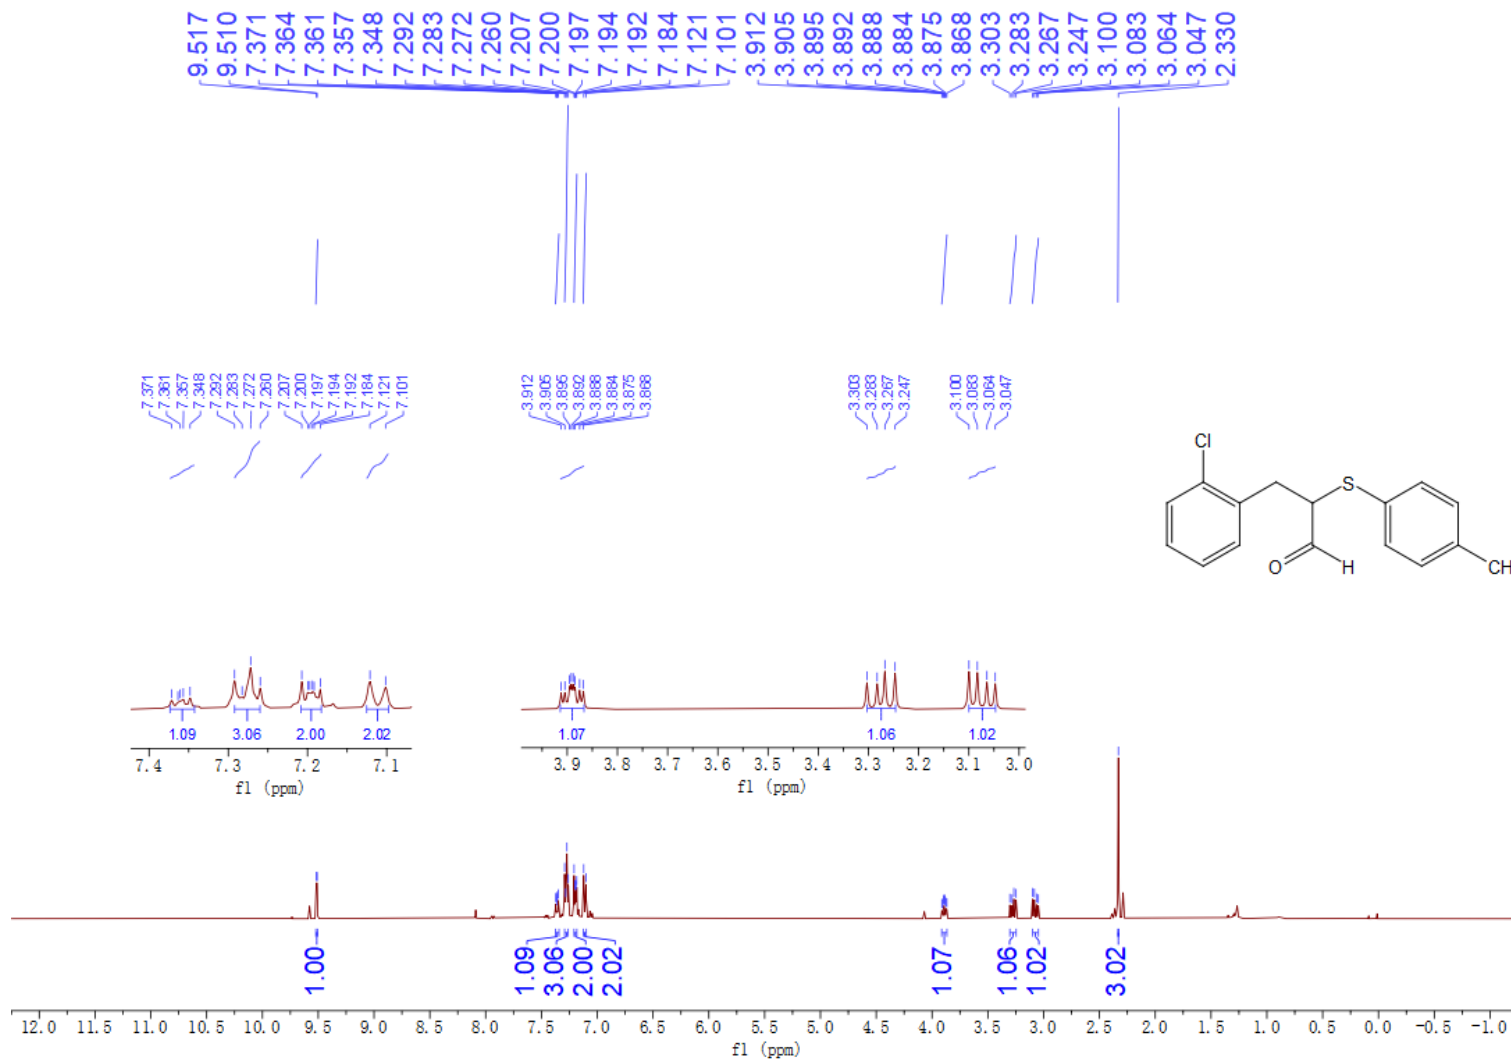

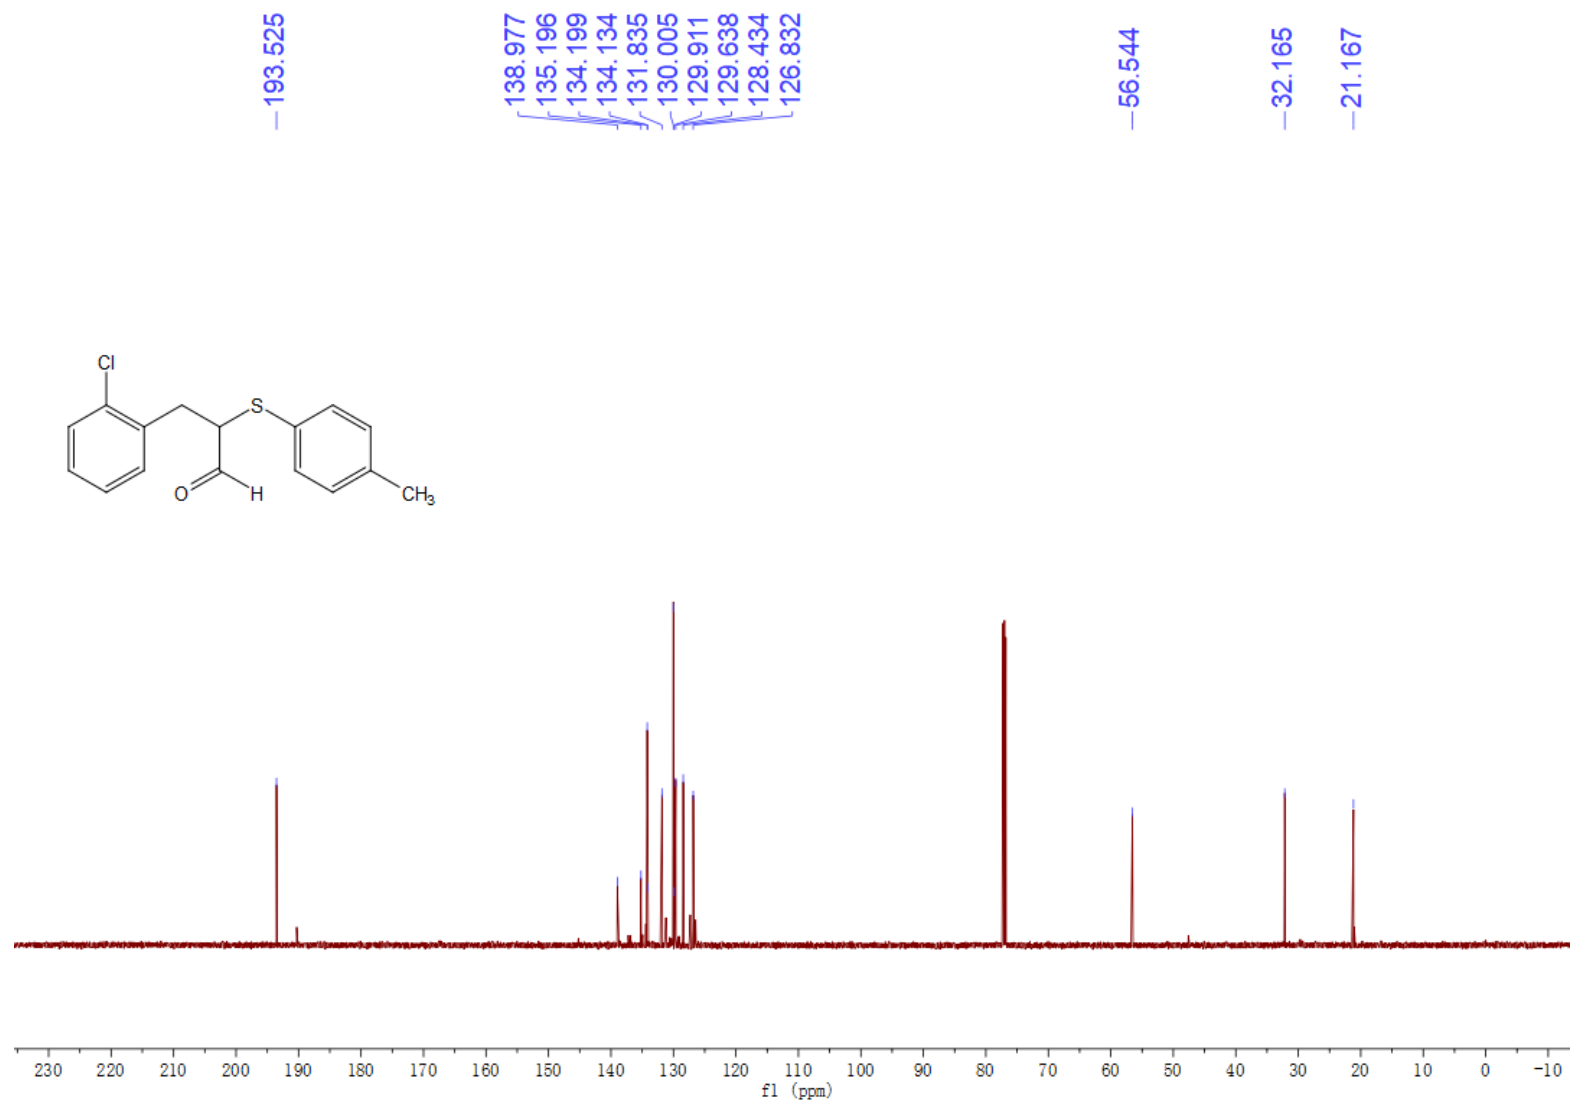

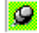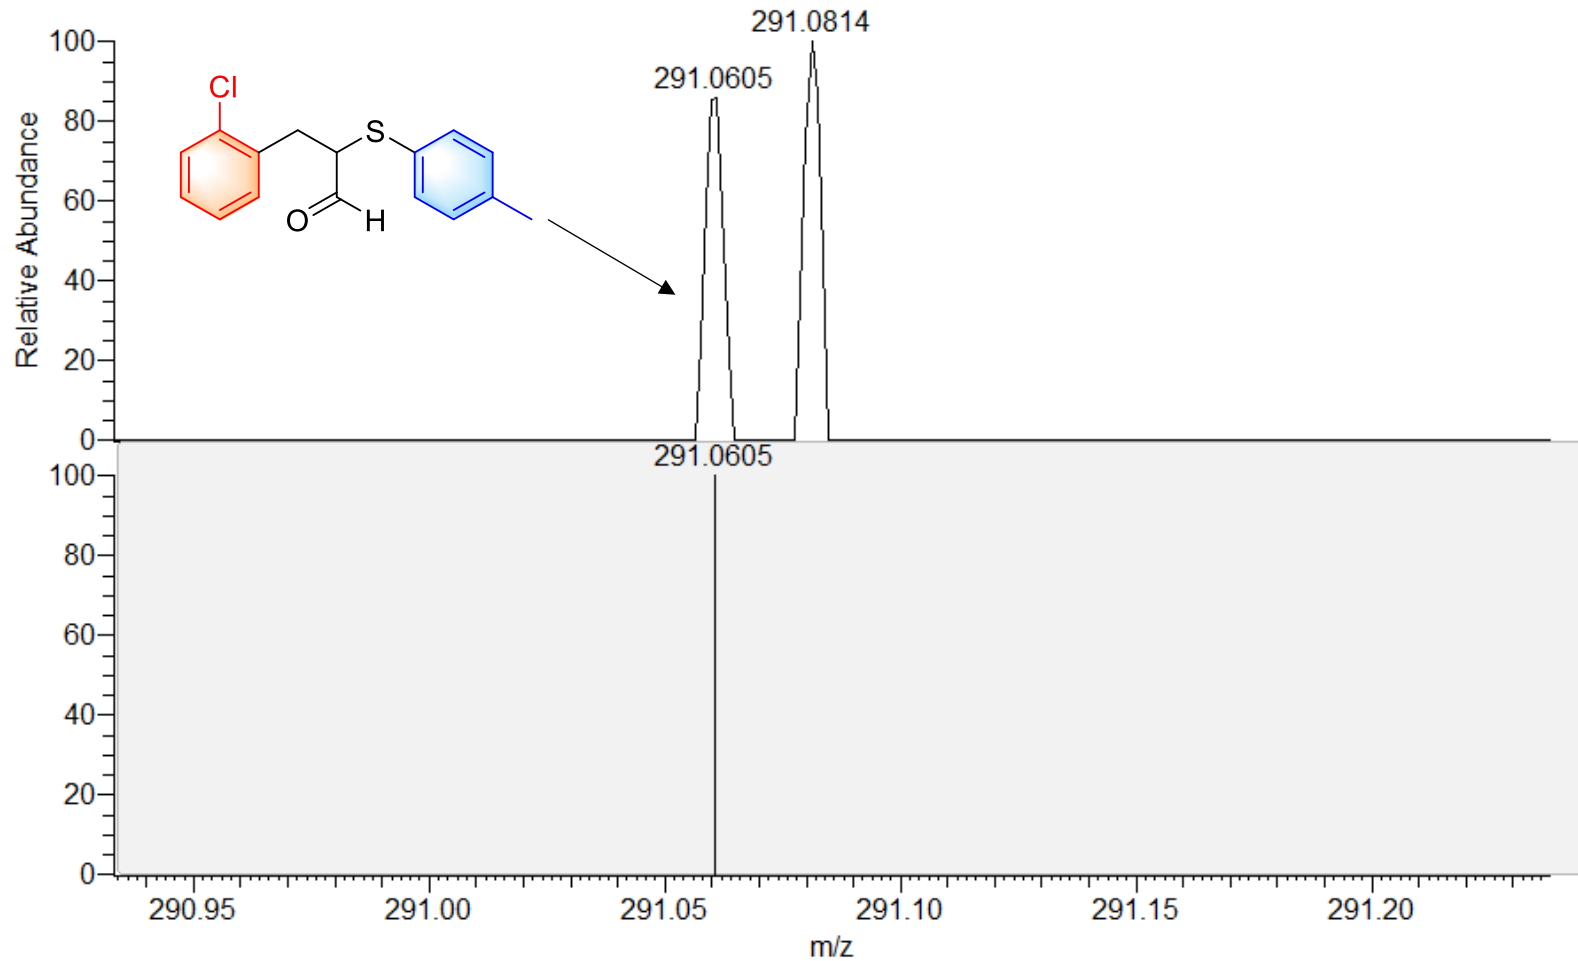

NL:  
5.26E5  
DZHY-MOUDAN-  
M7#28 RT: 0.12 AV:  
1 T: FTMS + p ESI  
Full lock ms  
[60.0000-750.0000]

NL:  
6.03E5  
C<sub>16</sub> H<sub>15</sub> ClOS +H:  
C<sub>16</sub> H<sub>16</sub> Cl<sub>1</sub> O<sub>1</sub> S<sub>1</sub>  
pa Chrg 1

**3-(2-bromophenyl)-2-(*p*-tolylthio)propanal (3ap)**

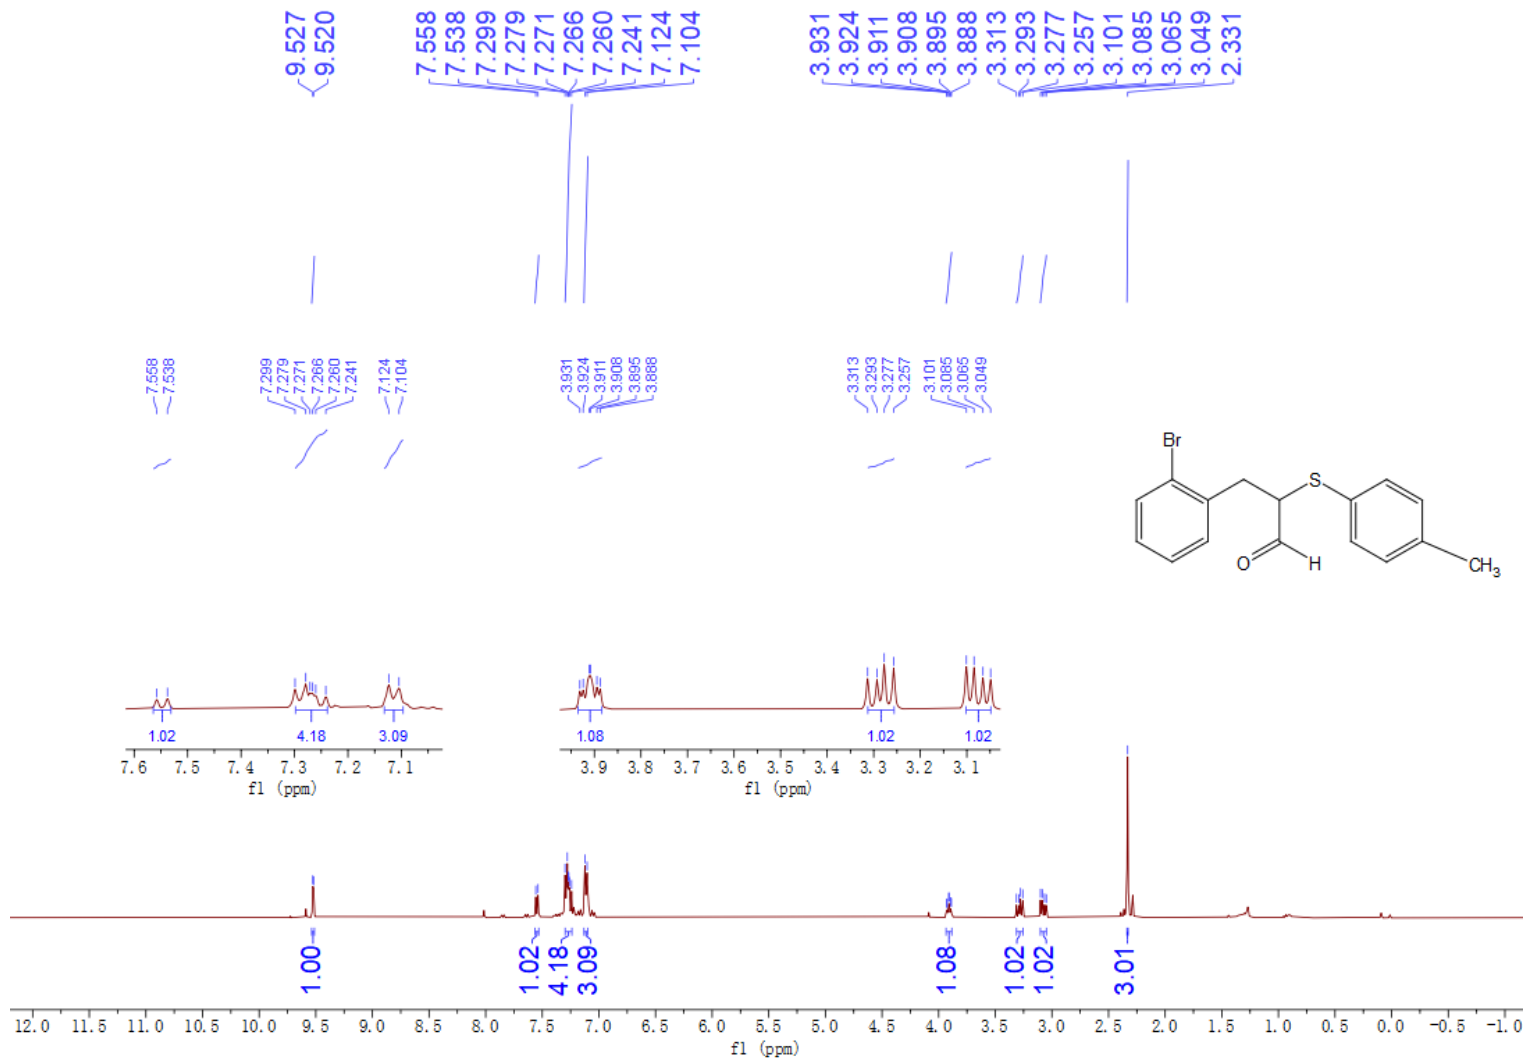

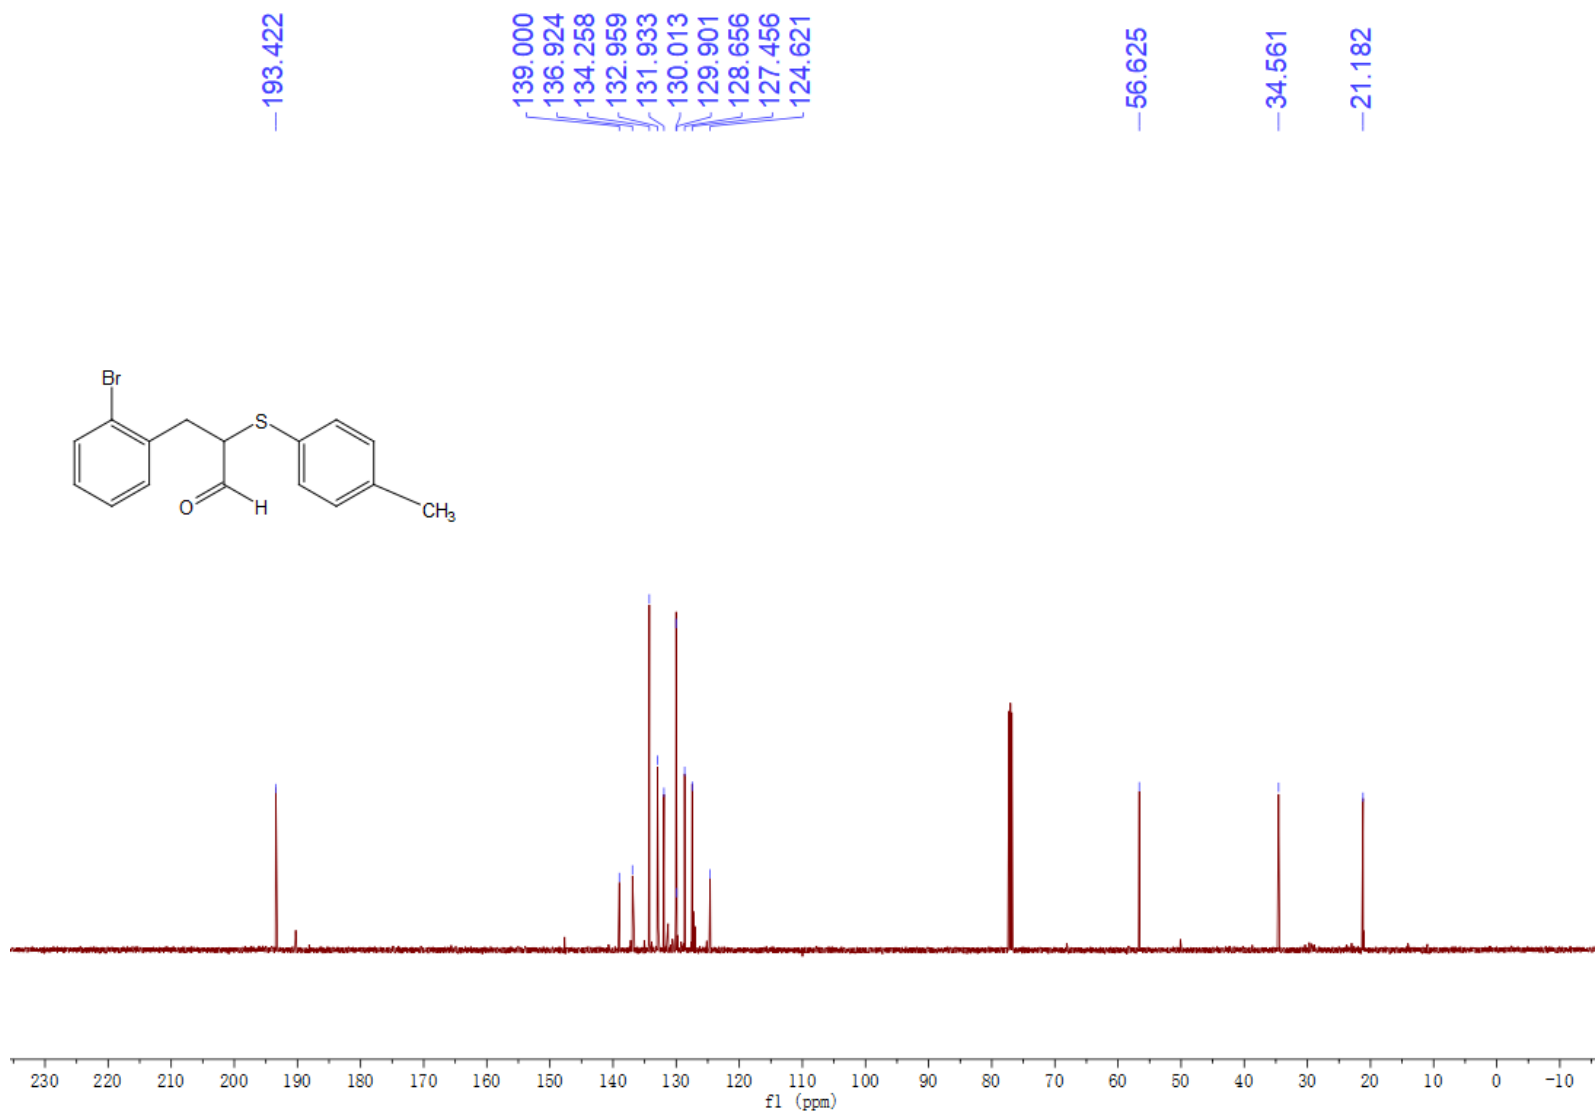



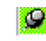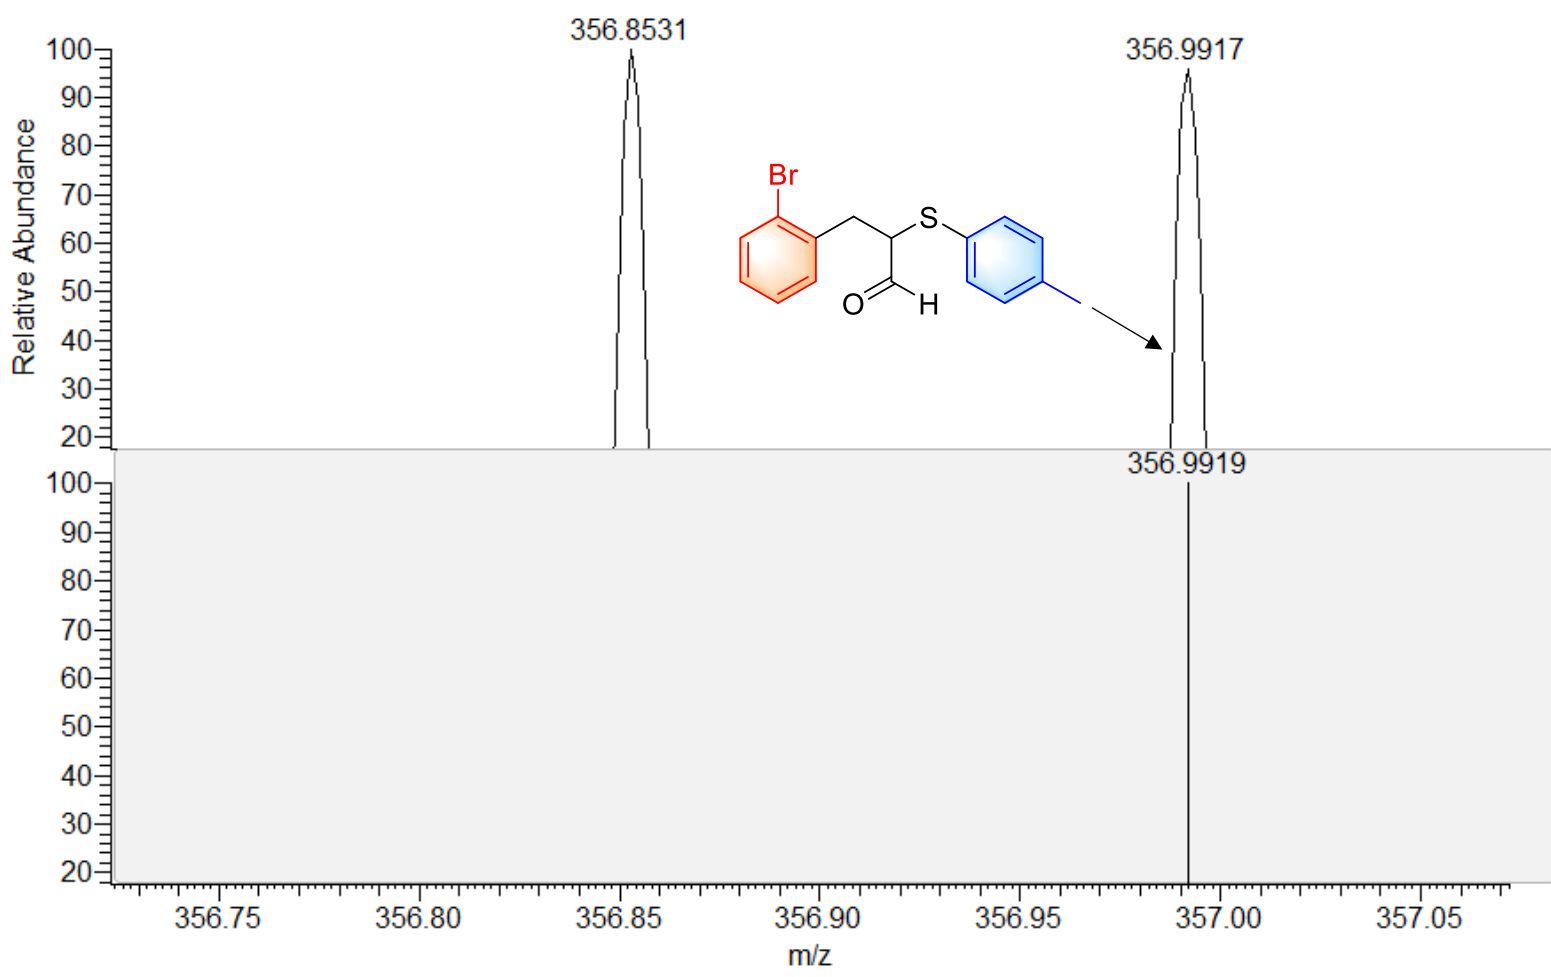

NL:  
3.82E5  
DZHY-MOUDAN-M7#29  
RT: 0.13 AV: 1 T:  
FTMS + p ESI Full lock  
ms [60.0000-750.0000]

NL:  
4.03E5  
C<sub>16</sub> H<sub>15</sub> BrOS +Na:  
C<sub>16</sub> H<sub>15</sub> Br<sub>1</sub> O<sub>1</sub> S<sub>1</sub> Na<sub>1</sub>  
pa Chrg 1

### 3-(4-nitrophenyl)-2-(*p*-tolylthio)propanal (3aq)

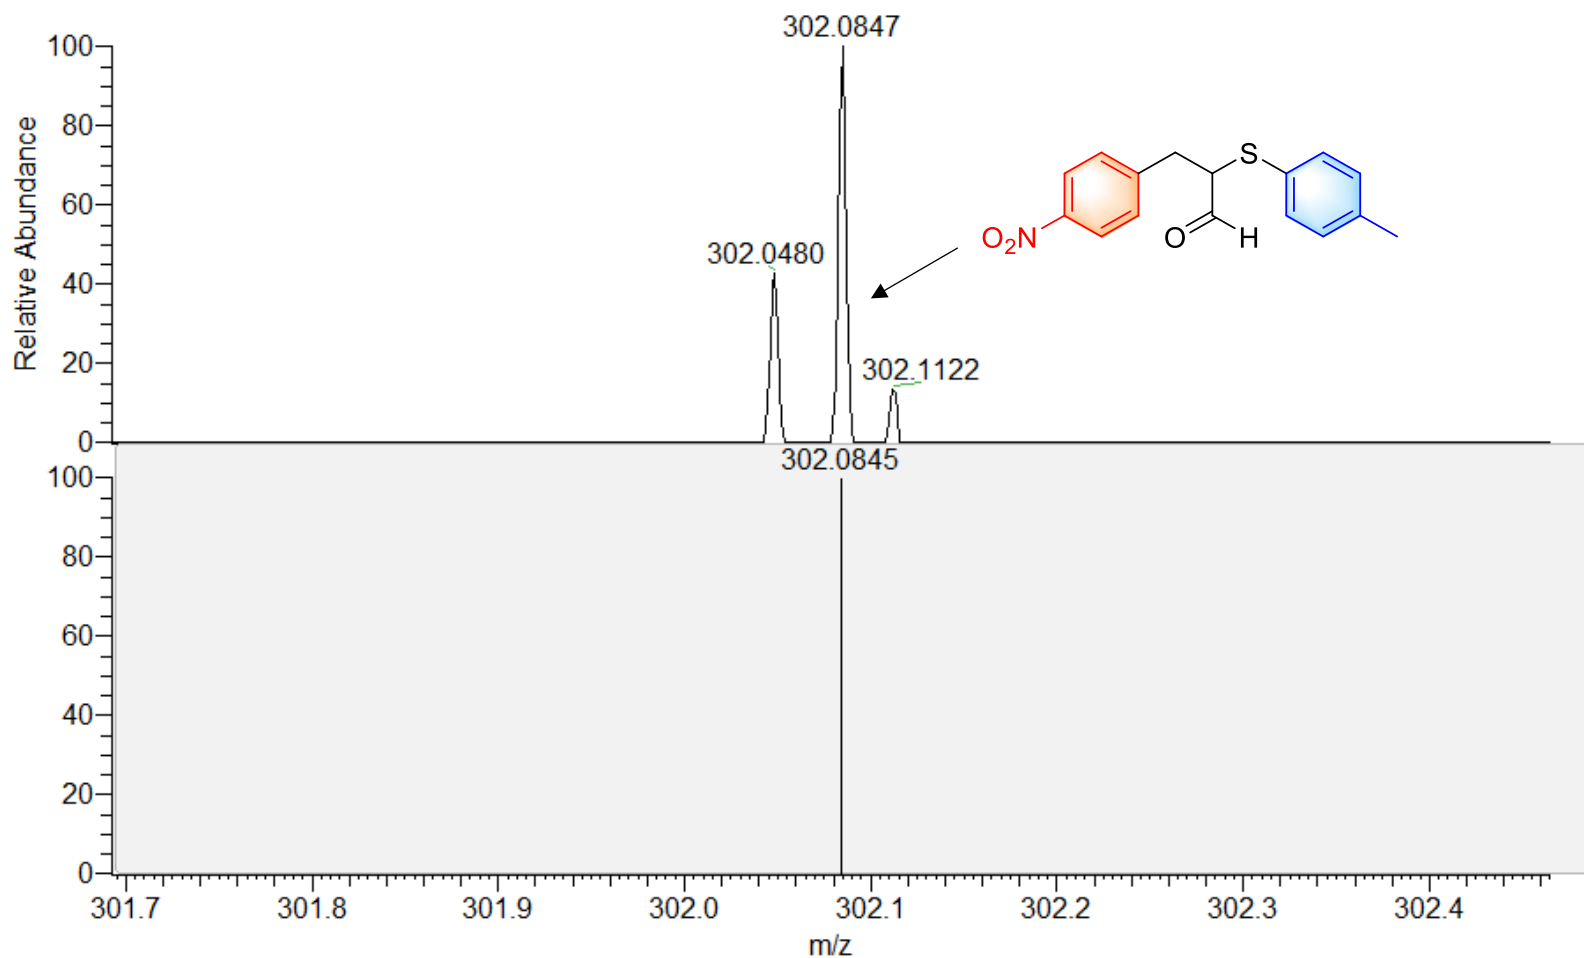

NL:  
3.32E5  
MOUDAN-M9#1  
RT: 0.00 AV: 1 T:  
FTMS + p ESI Full  
lock ms  
[100.0000-  
750.0000]

NL:  
7.89E5  
C<sub>16</sub> H<sub>15</sub> NO<sub>3</sub> S +H:  
C<sub>16</sub> H<sub>16</sub> N<sub>1</sub> O<sub>3</sub> S<sub>1</sub>  
pa Chrg 1

2-((4-methoxyphenyl)thio)-3-phenylpropanal (3ba)

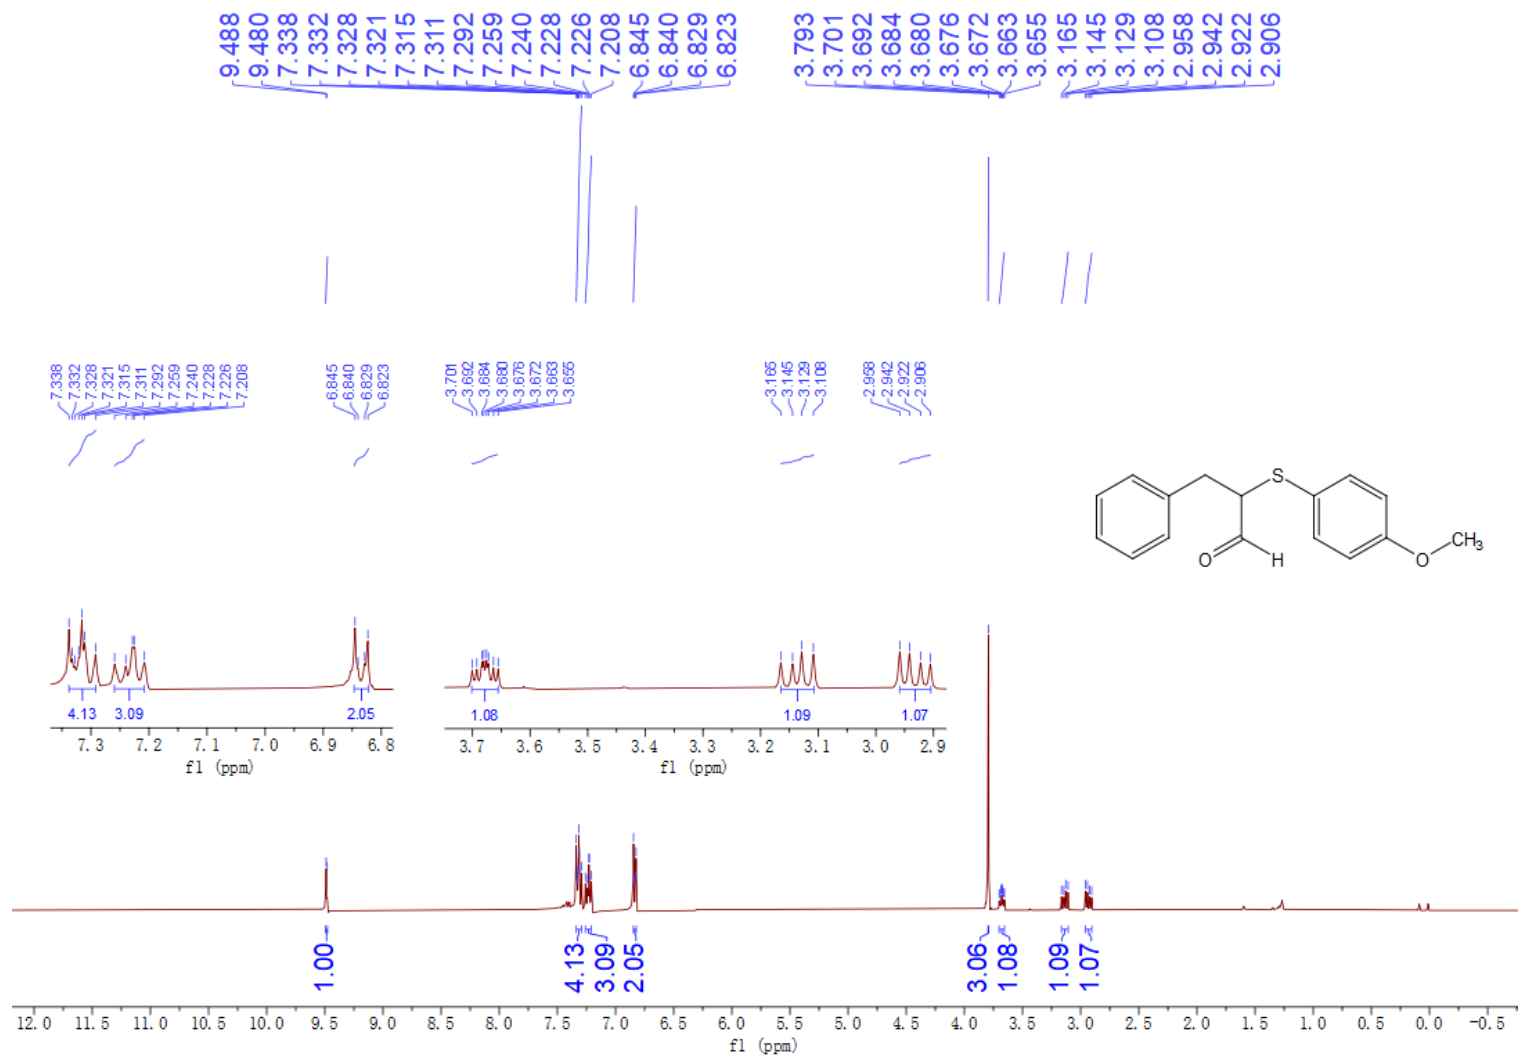

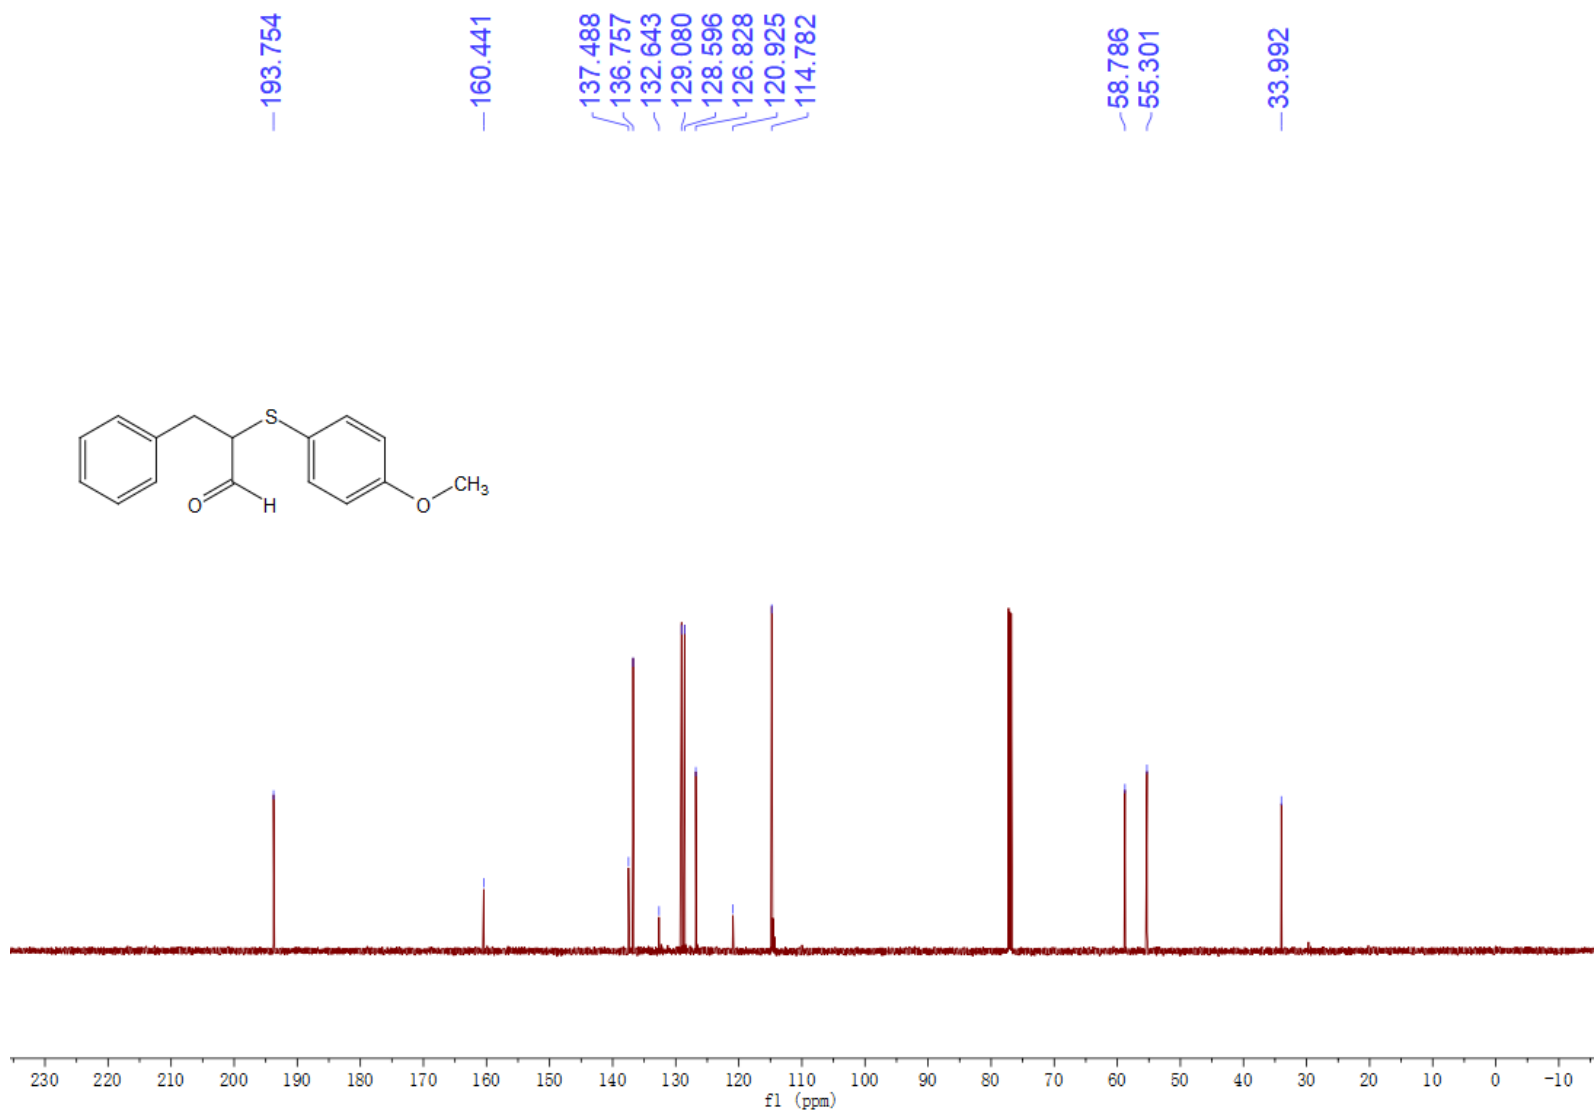

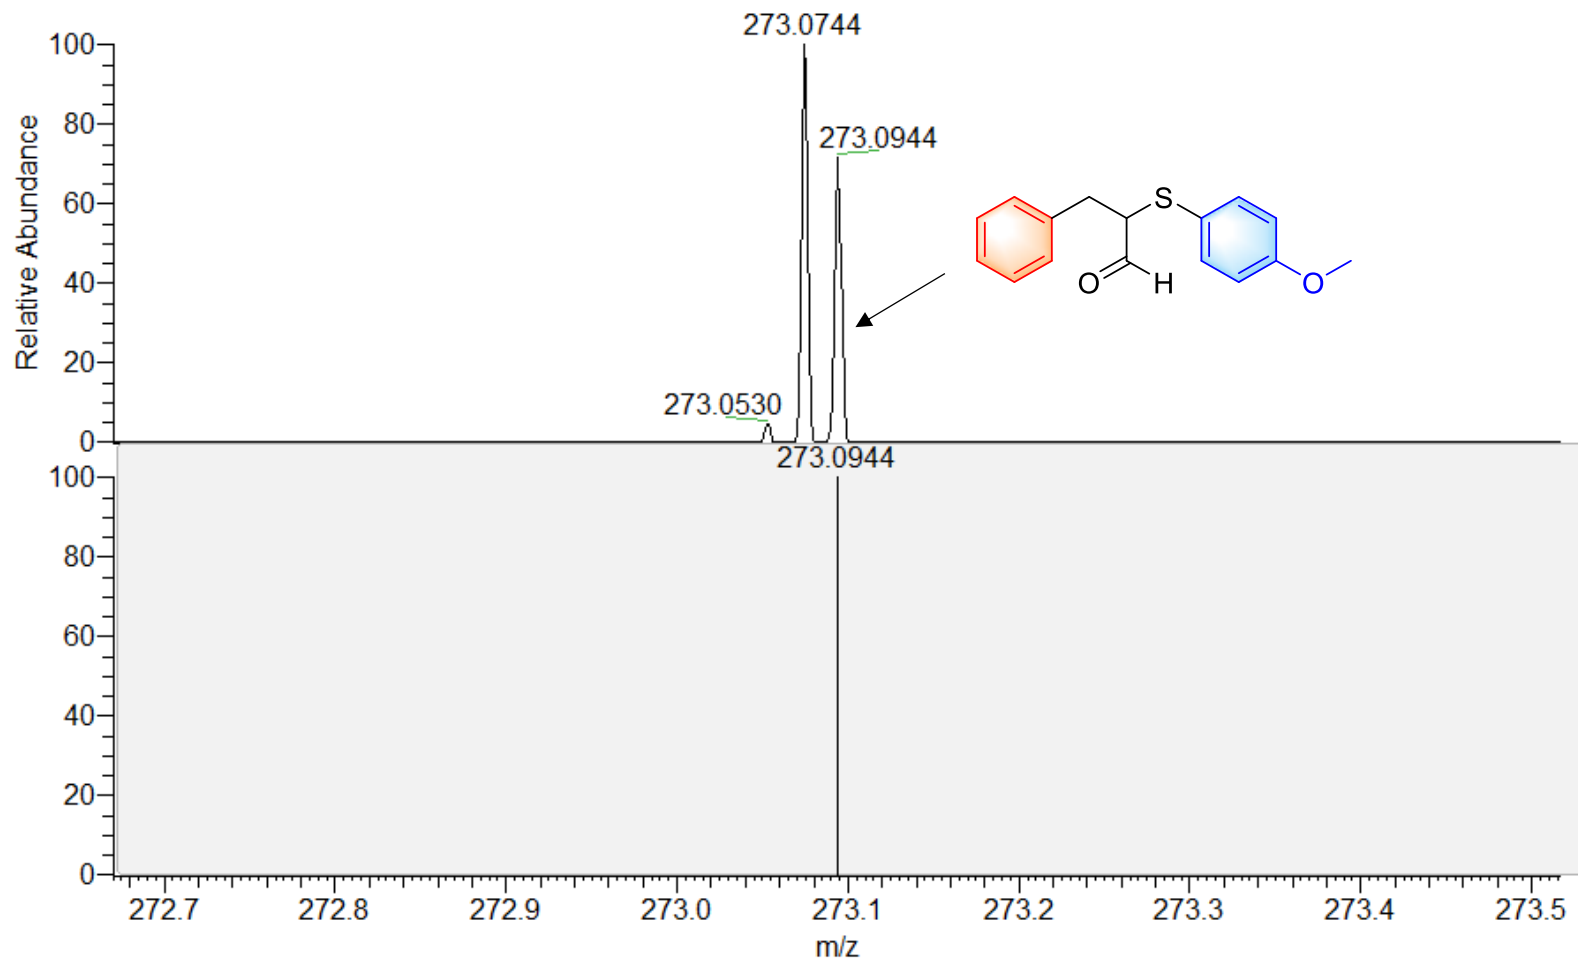

NL:  
2.30E6  
MOUDAN-M8#53  
RT: 0.24 AV: 1 T:  
FTMS + p ESI Full  
lock ms  
[75.0000-750.0000]

NL:  
7.94E5  
C<sub>16</sub> H<sub>16</sub> O<sub>2</sub> S +H:  
C<sub>16</sub> H<sub>17</sub> O<sub>2</sub> S<sub>1</sub>  
pa Chrg 1

**3-phenyl-2-(*m*-tolylthio)propanal (3bb)**

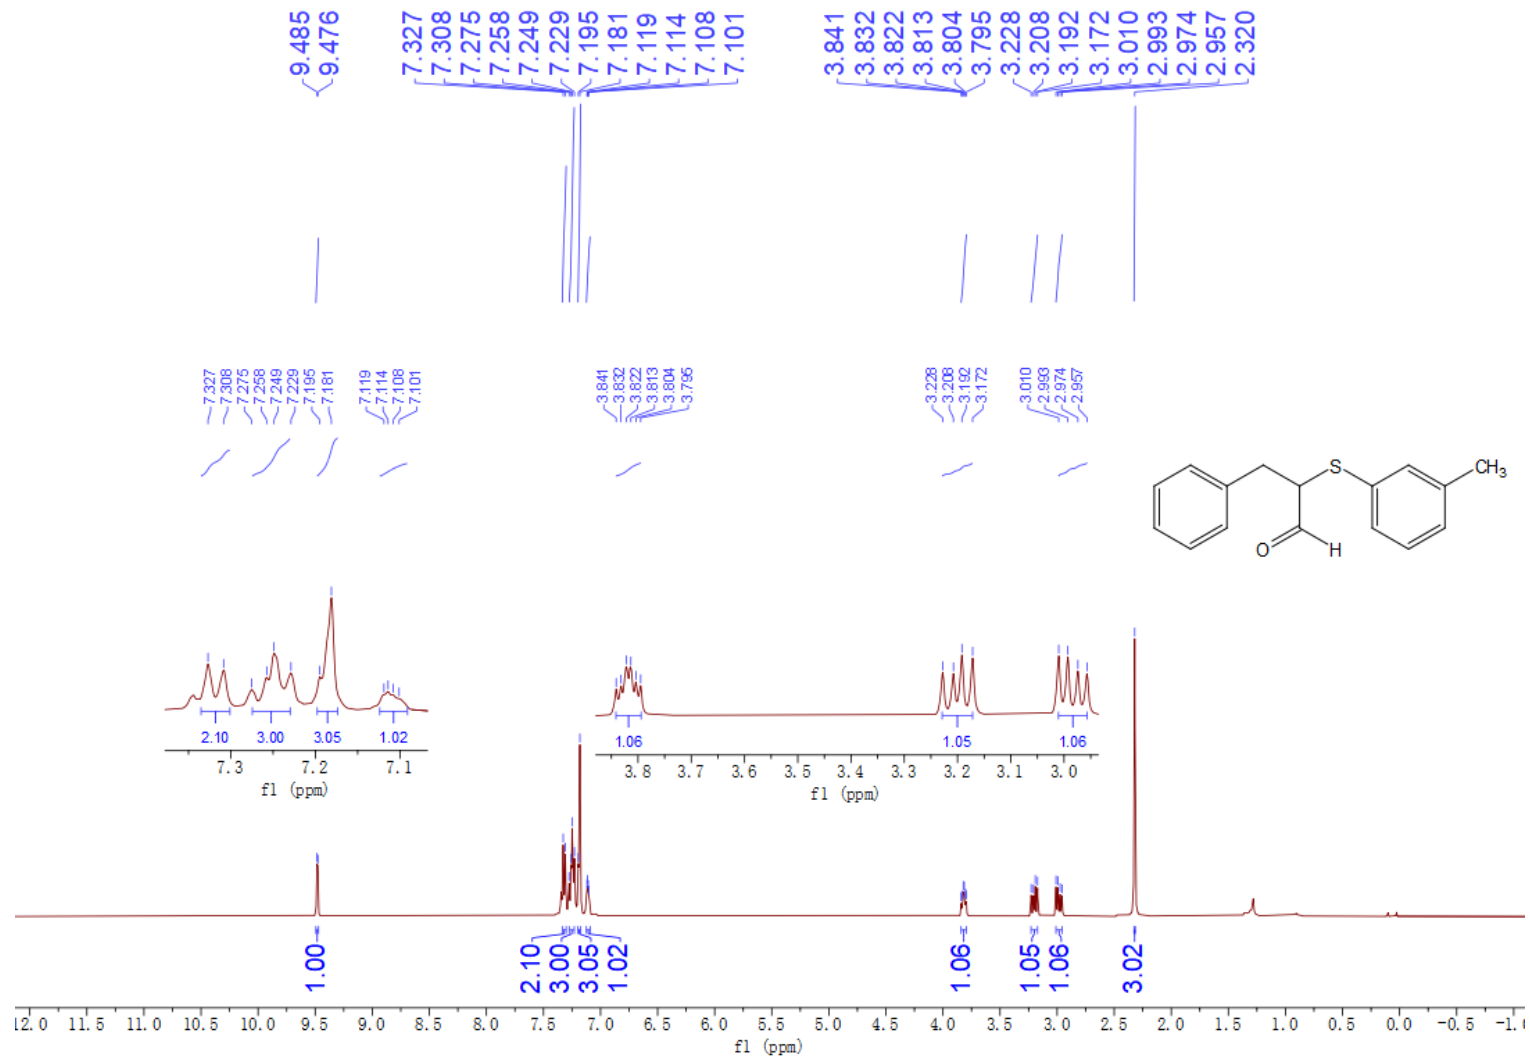

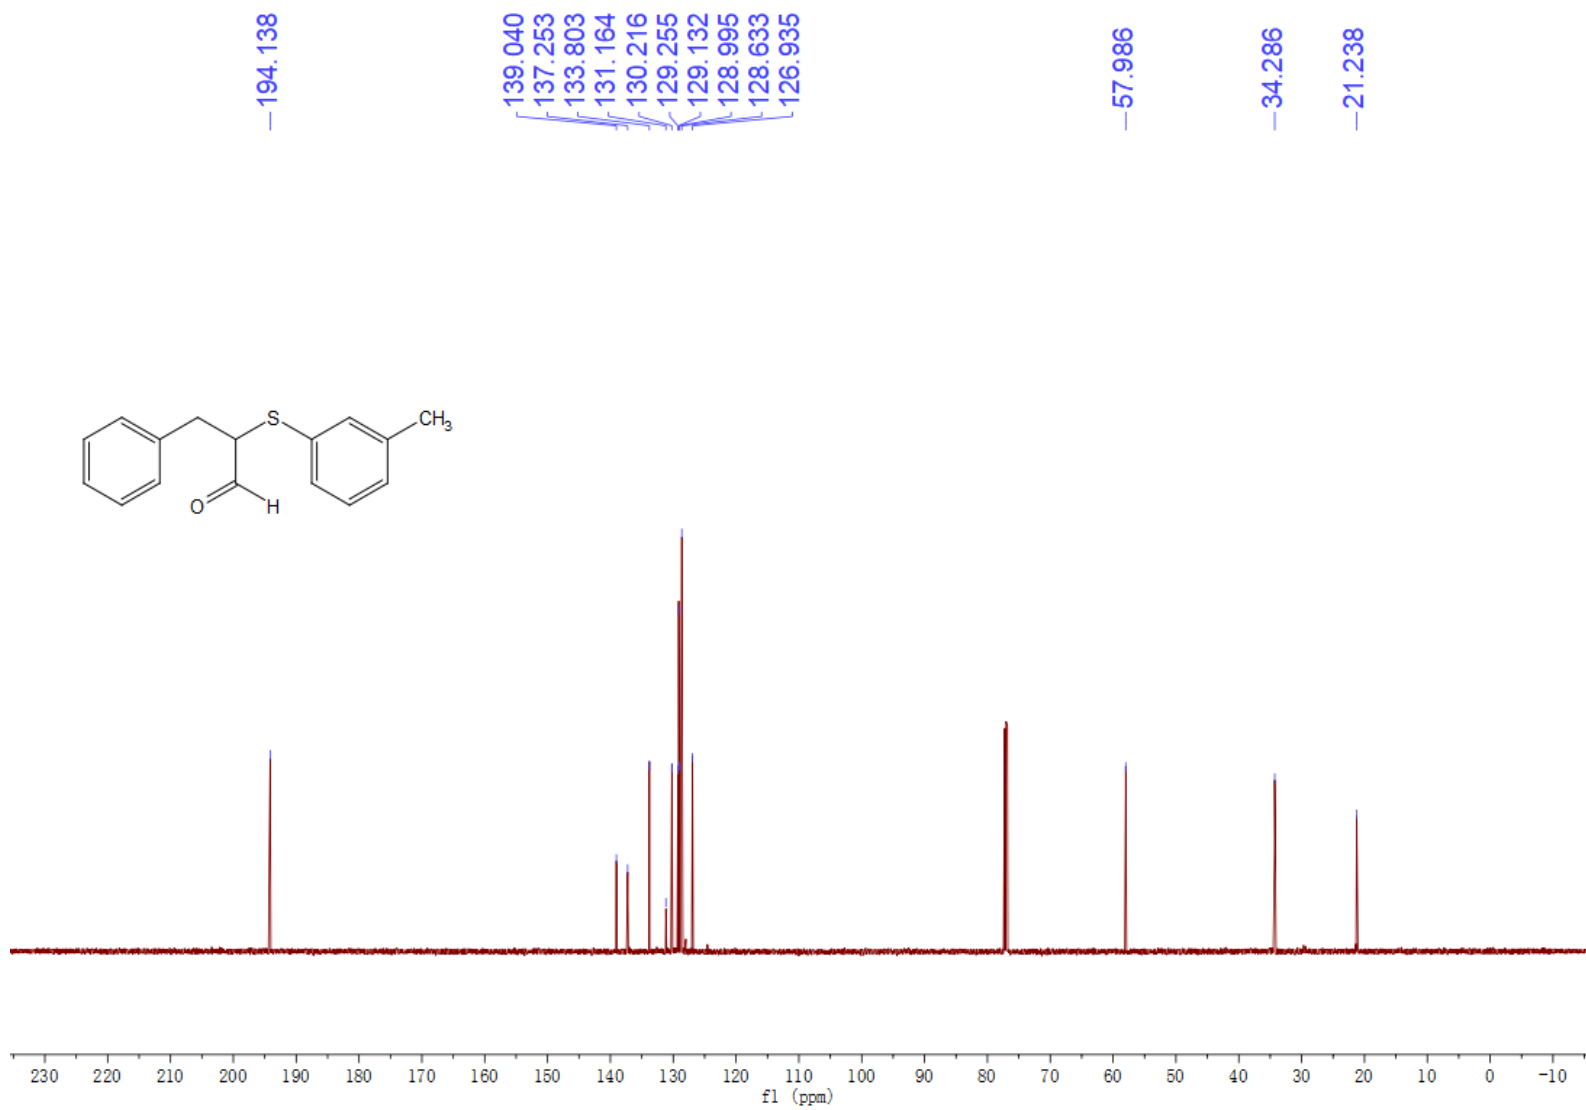

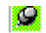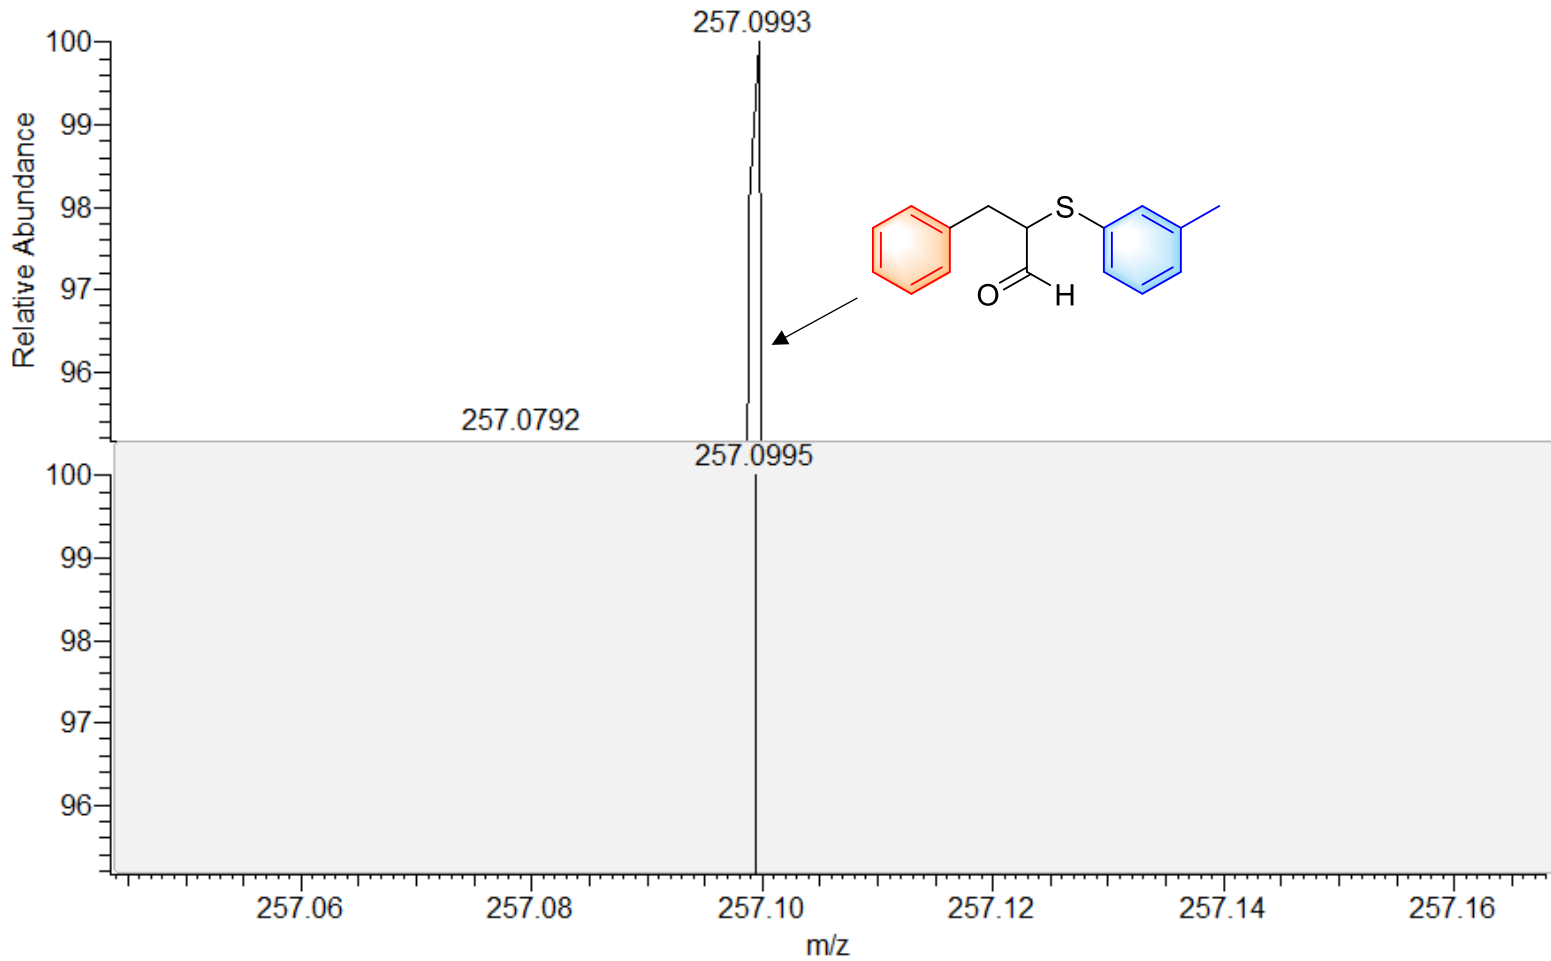

NL:  
7.84E5  
DZHY-MOUDAN-  
M7#8 RT: 0.04 AV:  
1 T: FTMS + p ESI  
Full lock ms  
[60.0000-750.0000]

NL:  
7.96E5  
C<sub>16</sub> H<sub>16</sub> OS +H:  
C<sub>16</sub> H<sub>17</sub> O<sub>1</sub> S<sub>1</sub>  
pa Chrg 1



**3-phenyl-2-(*o*-tolylthio)propanal (3bc)**

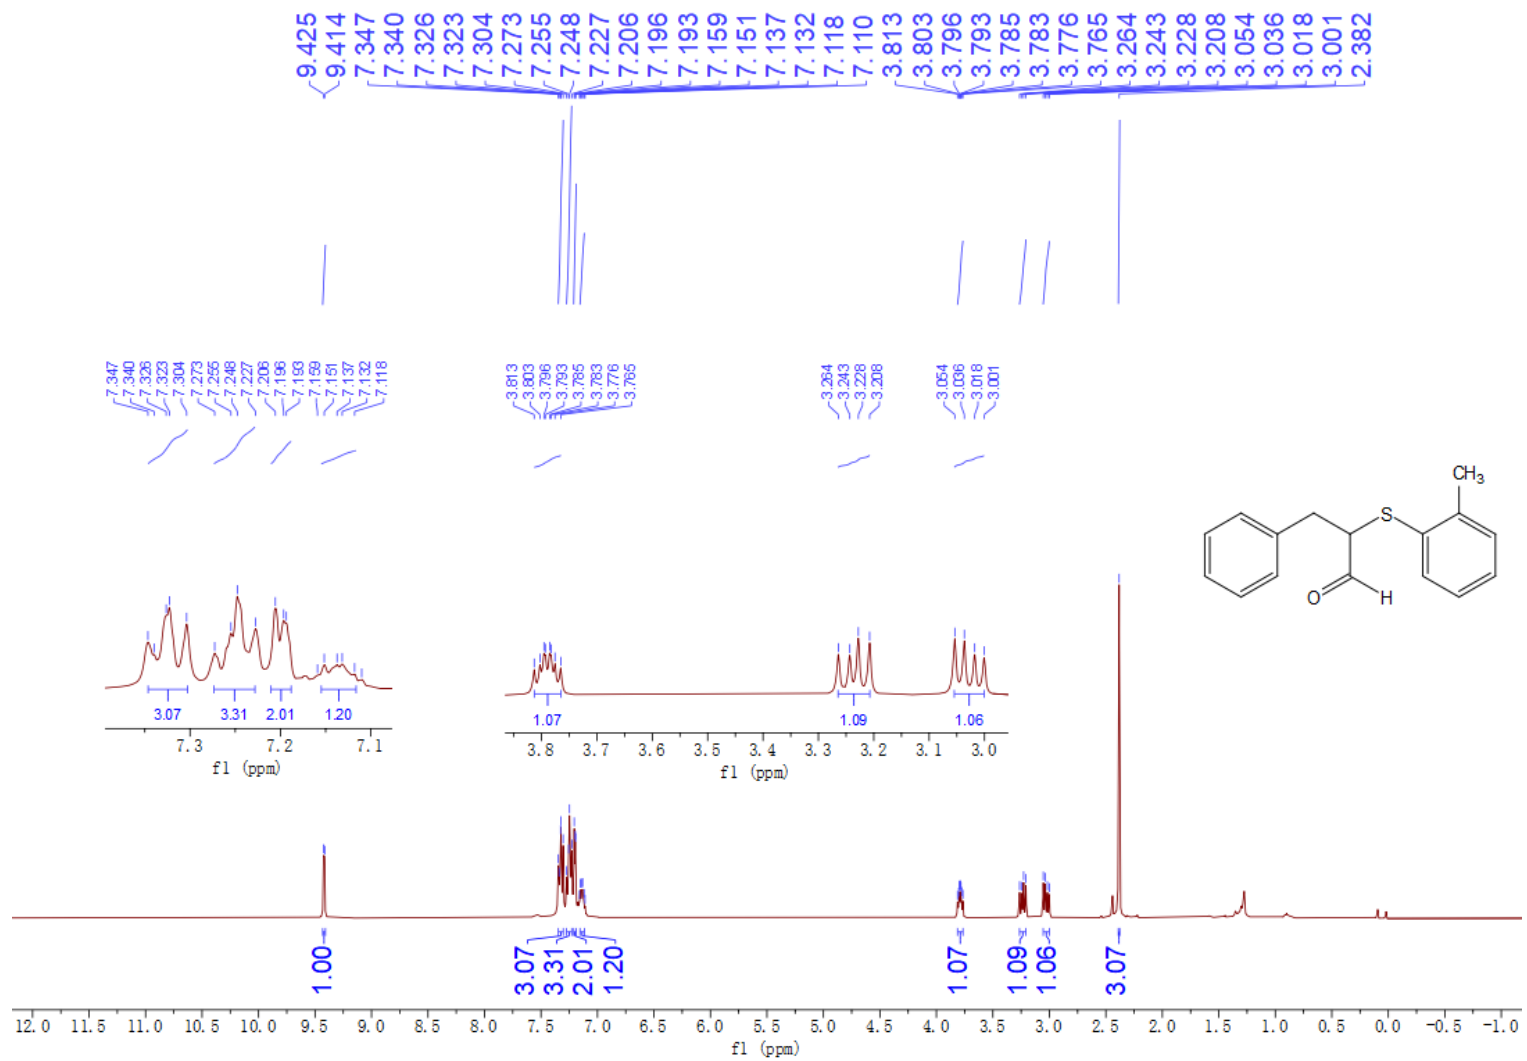

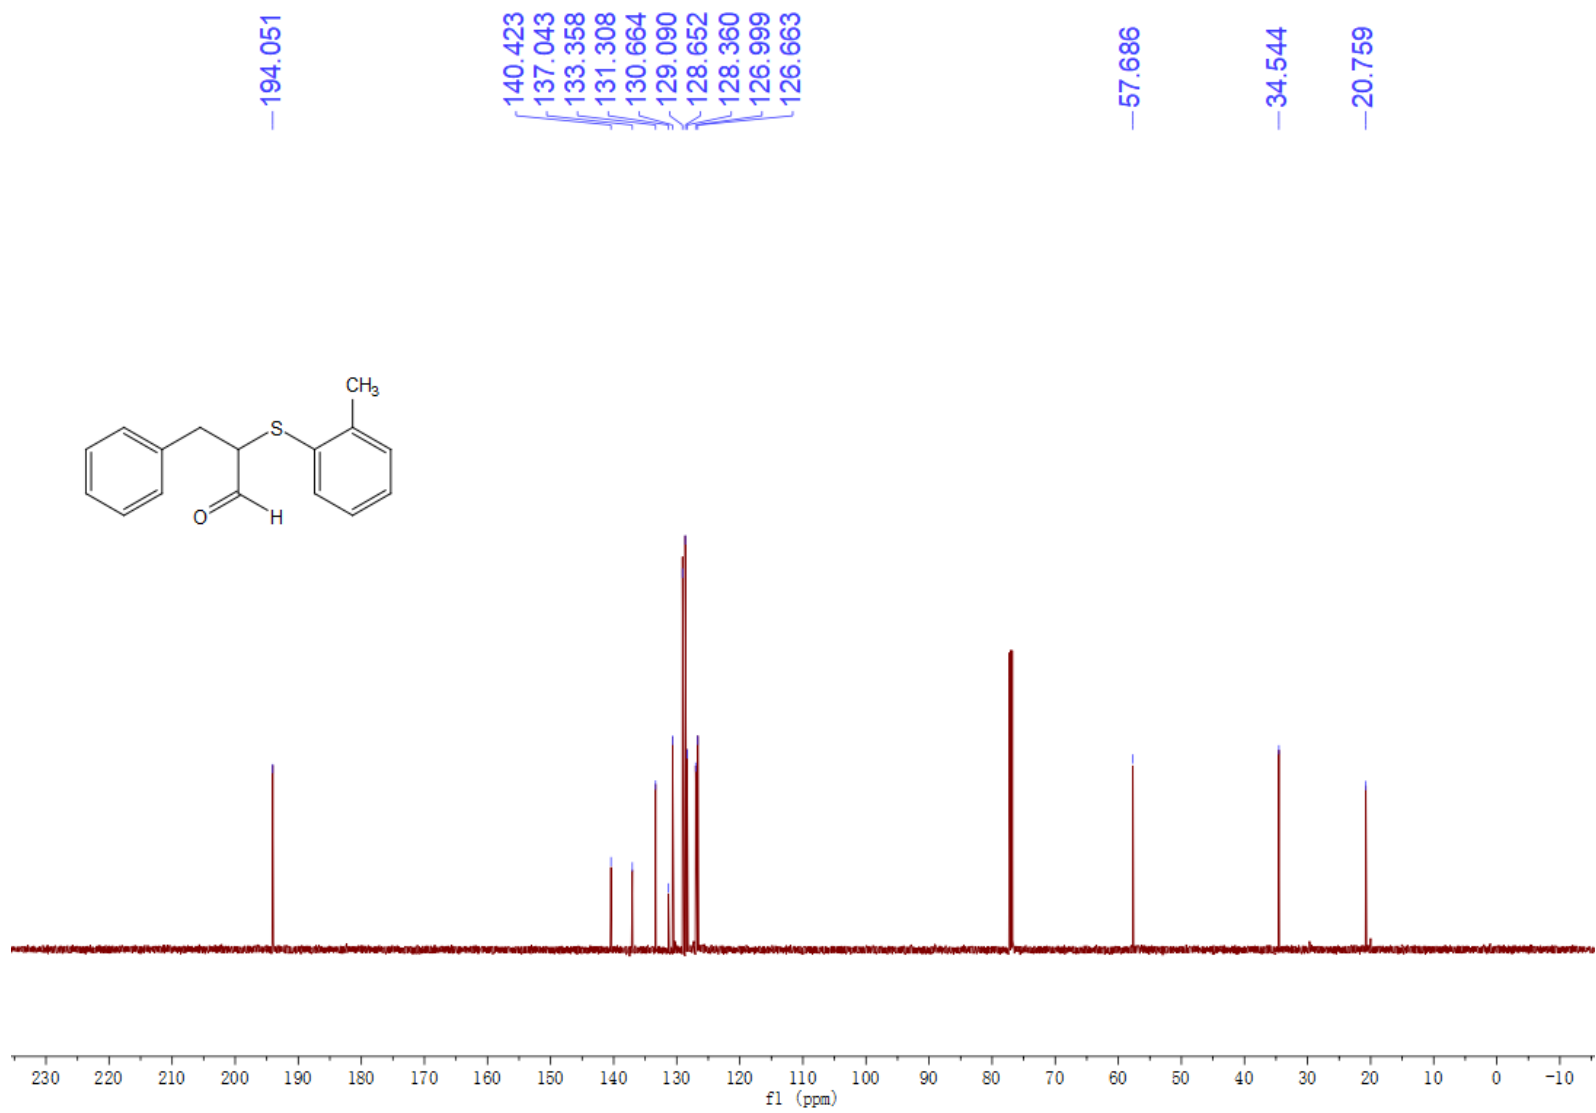

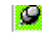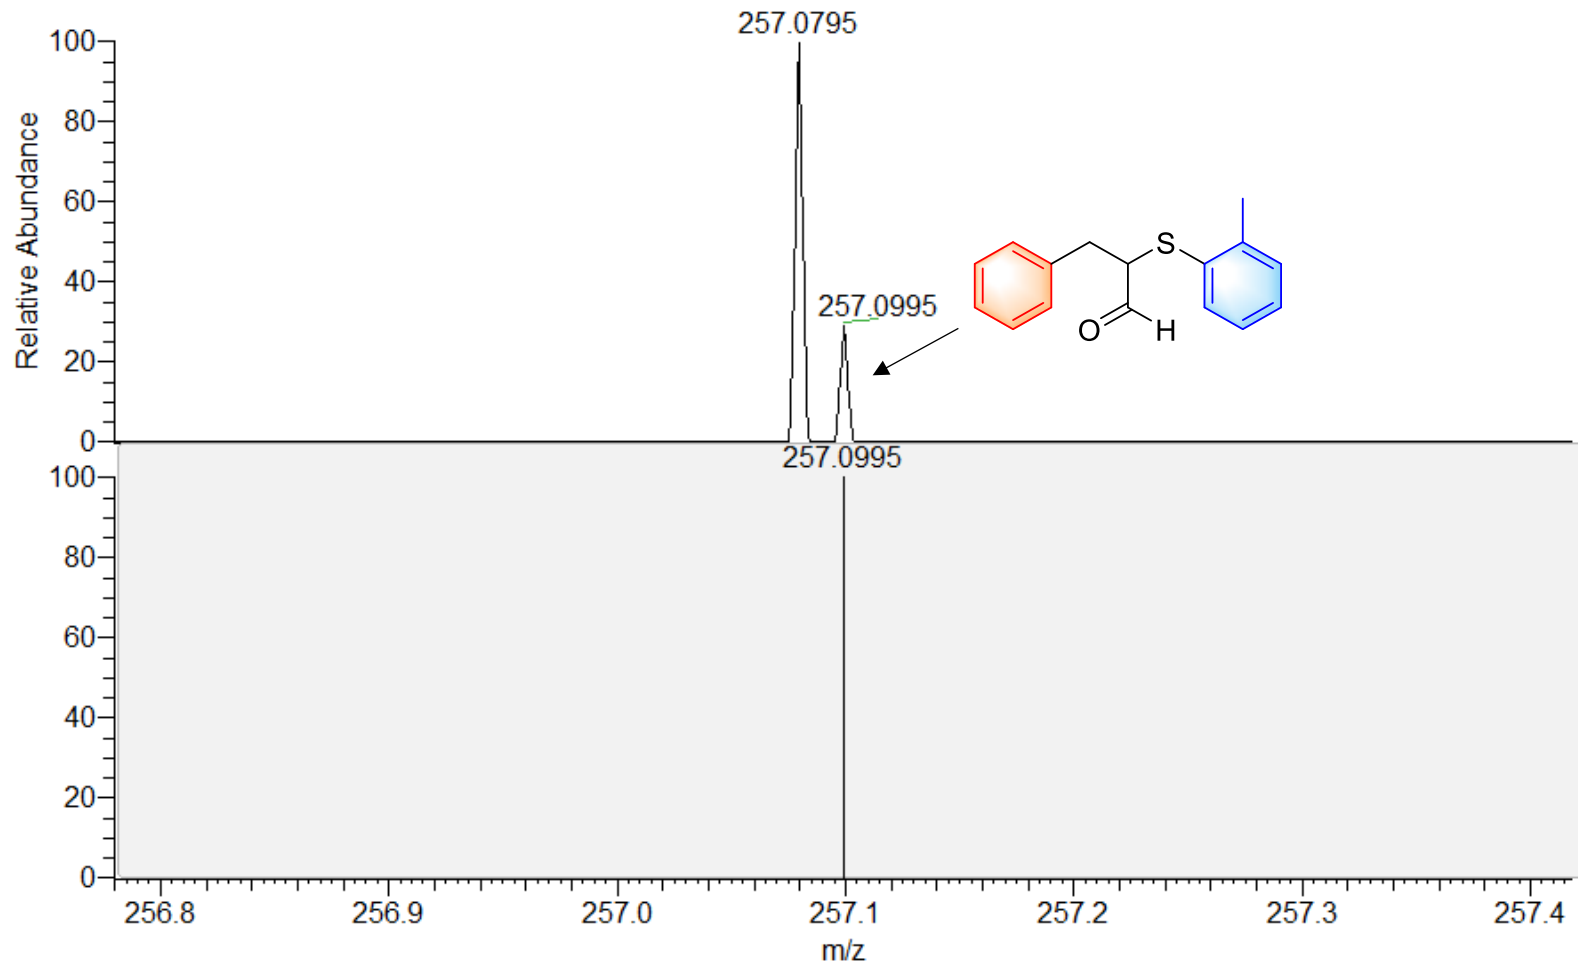

NL:  
1.60E6  
MOUDAN-M8#97  
RT: 0.43 AV: 1 T:  
FTMS + p ESI Full  
lock ms  
[75.0000-750.0000]

NL:  
7.96E5  
C<sub>16</sub> H<sub>16</sub> OS +H:  
C<sub>16</sub> H<sub>17</sub> O<sub>1</sub> S<sub>1</sub>  
pa Chrg 1

2-((2-methoxyphenyl)thio)-3-phenylpropanal (3bd)

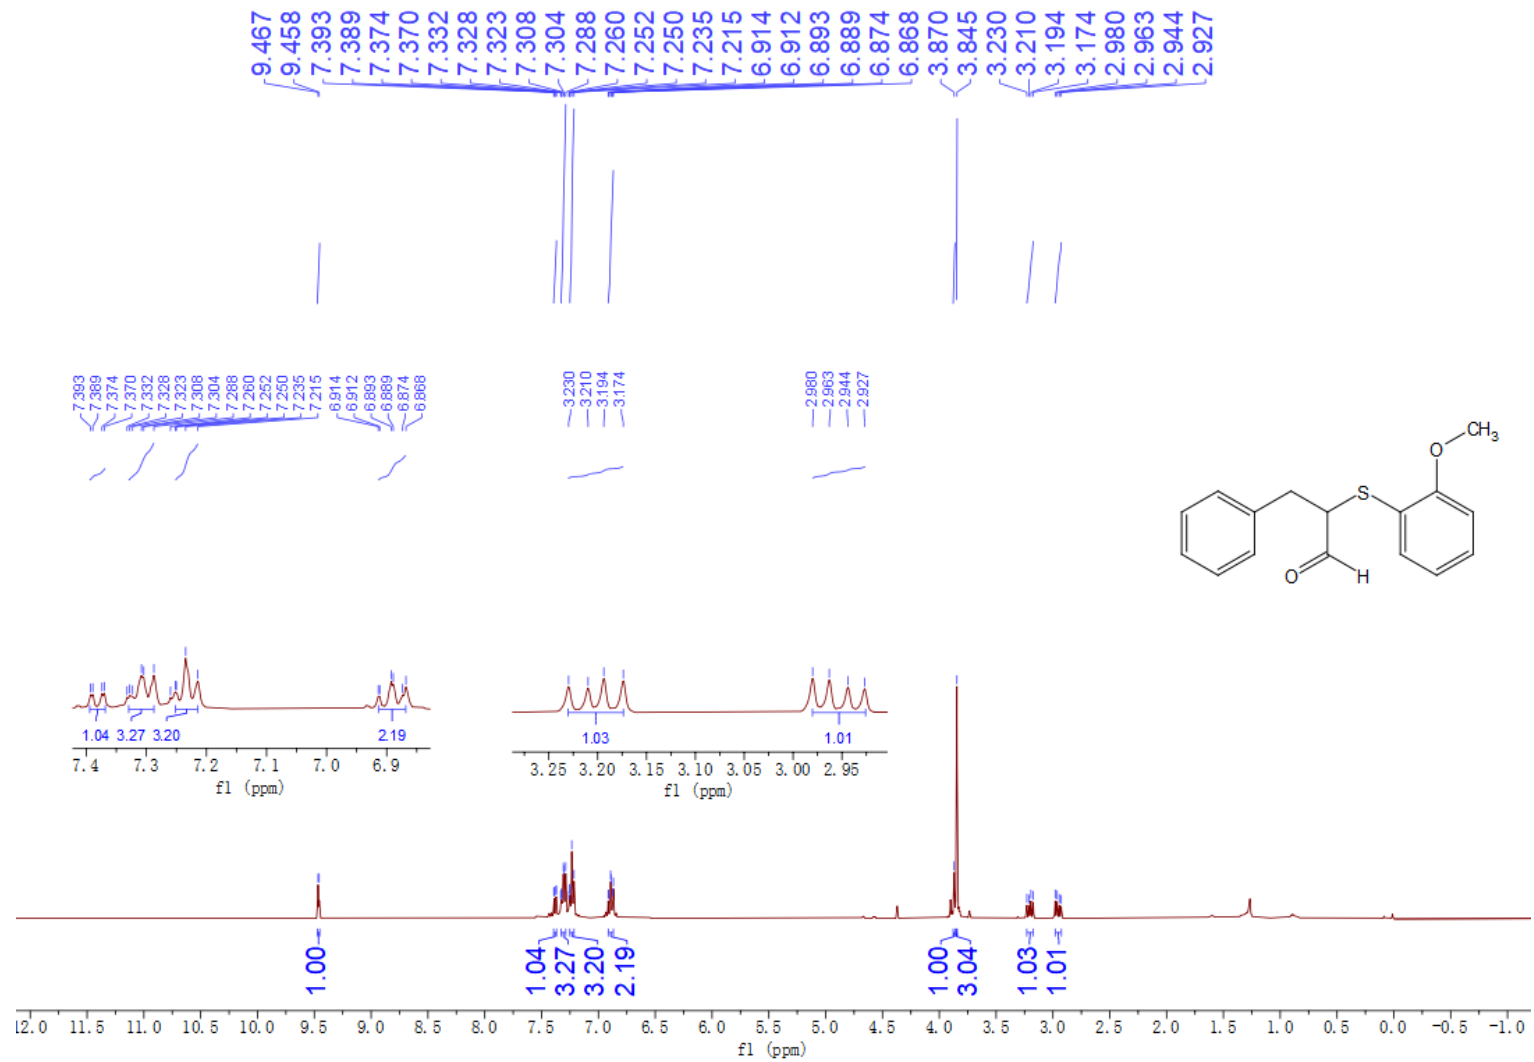

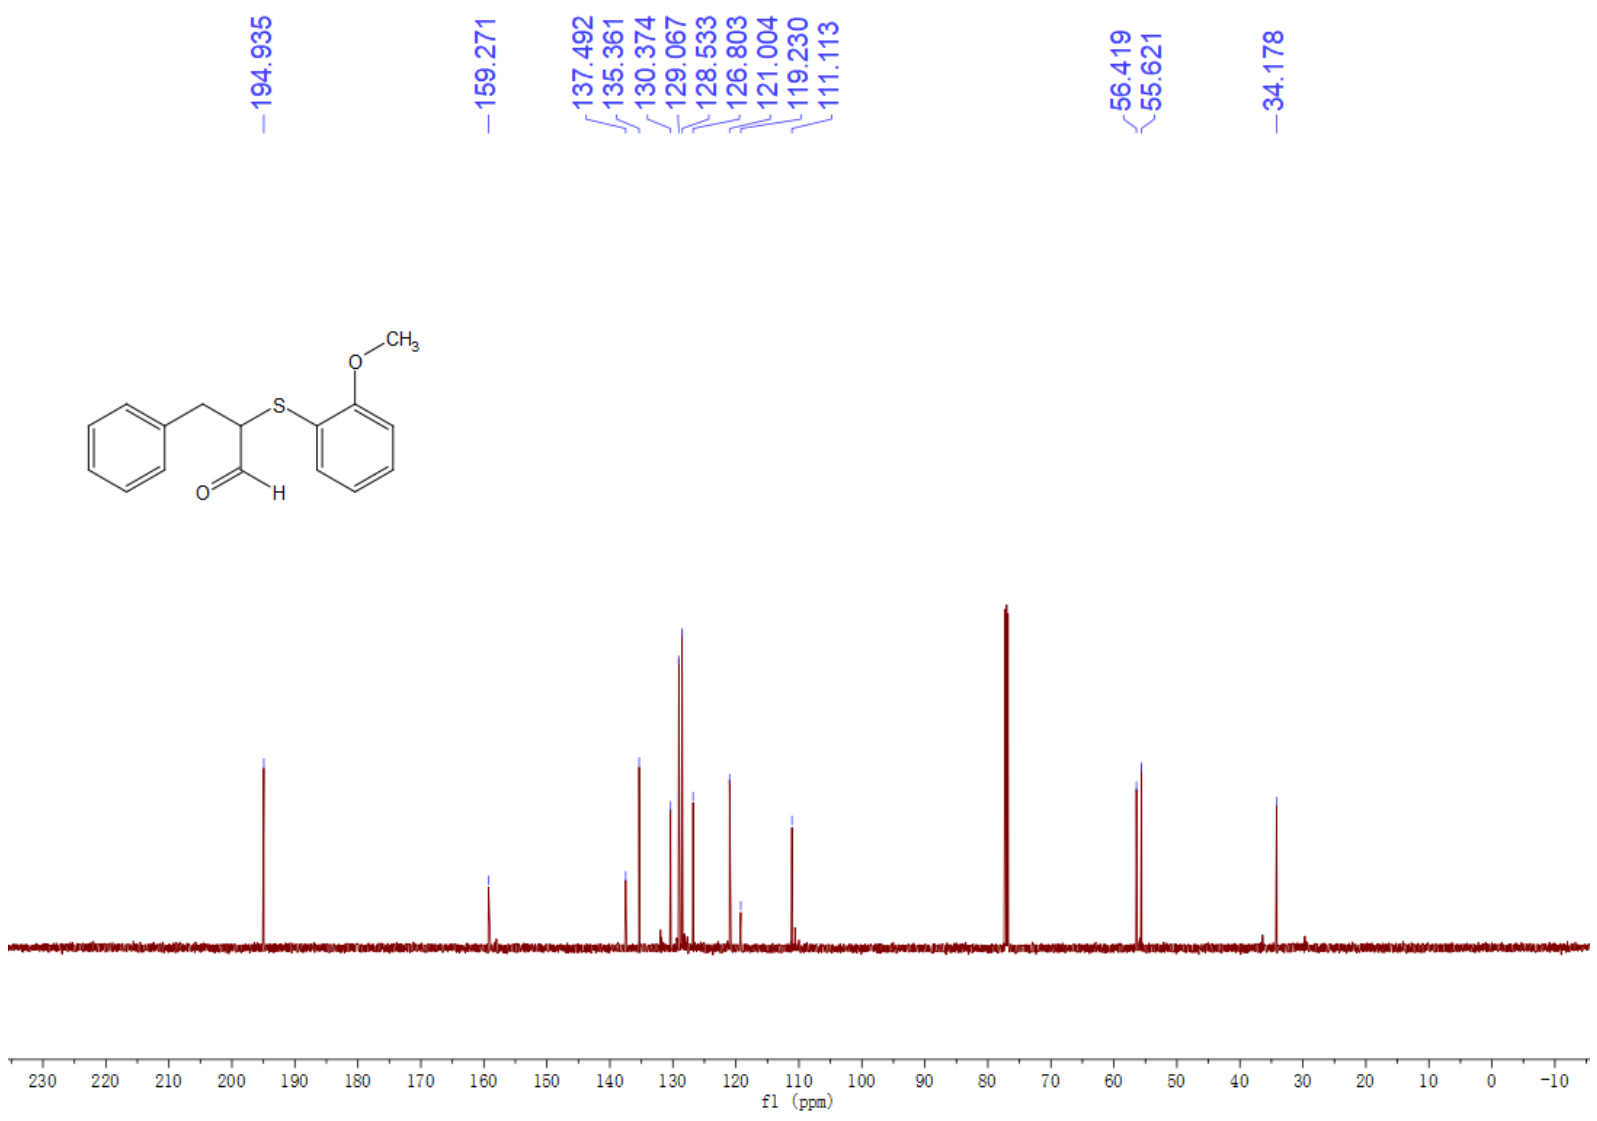

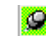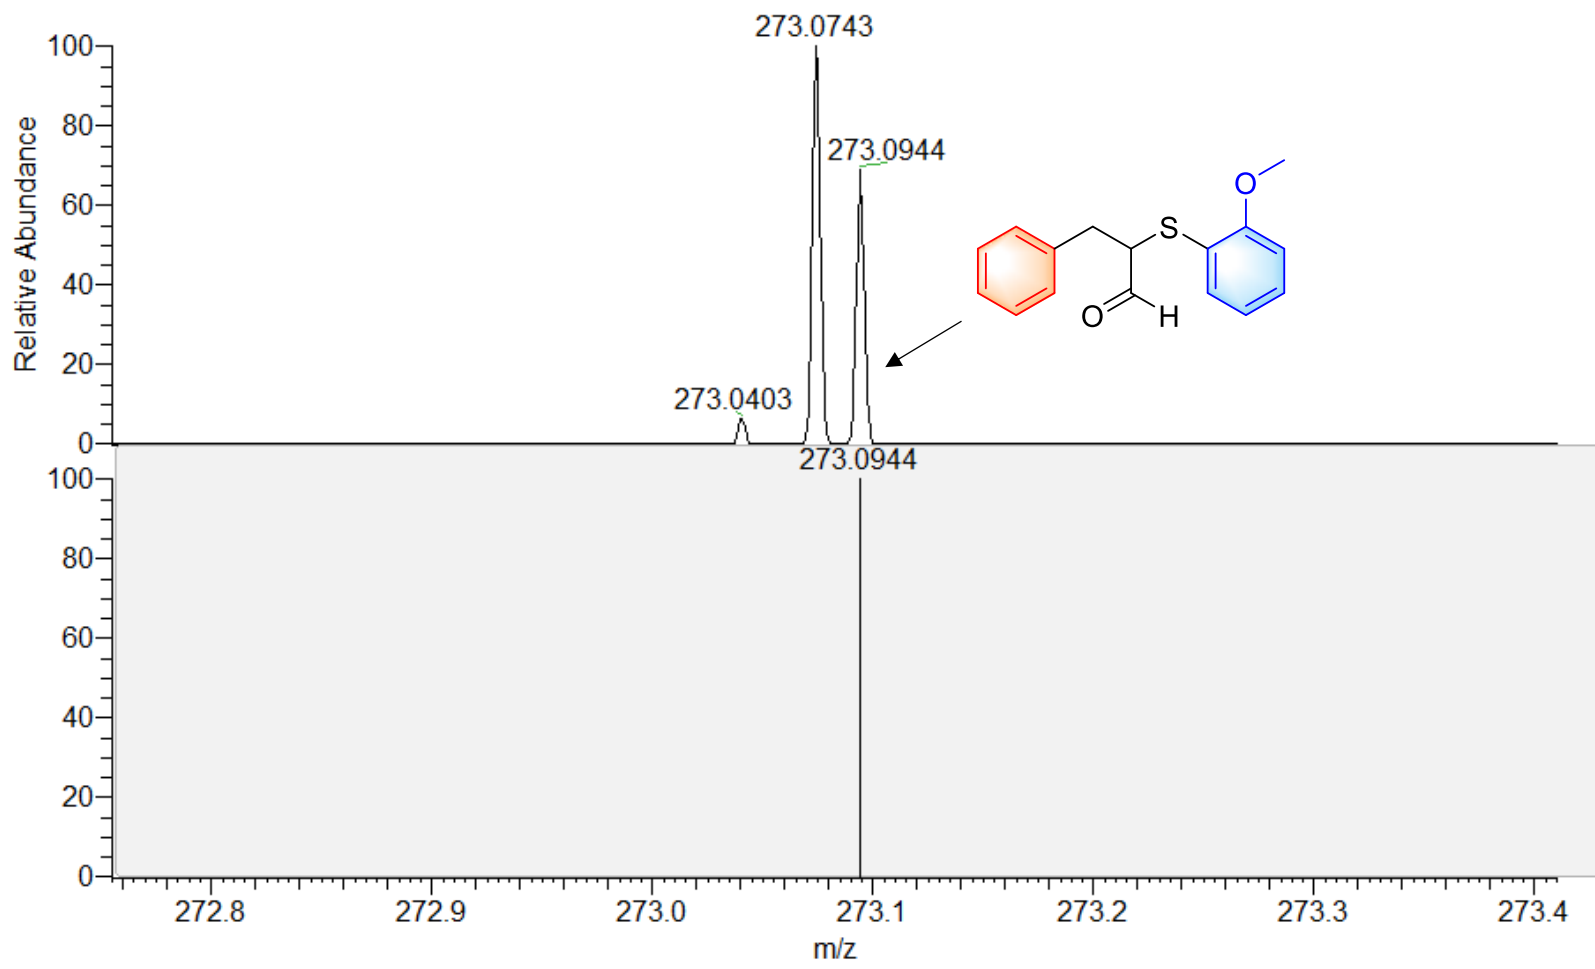

NL:  
1.83E6  
MOUDAN-M8#55  
RT: 0.25 AV: 1 T:  
FTMS + p ESI Full  
lock ms  
[75.0000-750.0000]

NL:  
7.94E5  
C<sub>16</sub> H<sub>16</sub> O<sub>2</sub> S +H:  
C<sub>16</sub> H<sub>17</sub> O<sub>2</sub> S<sub>1</sub>  
pa Chrg 1

**2-((3,4-dimethylphenyl)thio)-3-phenylpropanal (3be)**

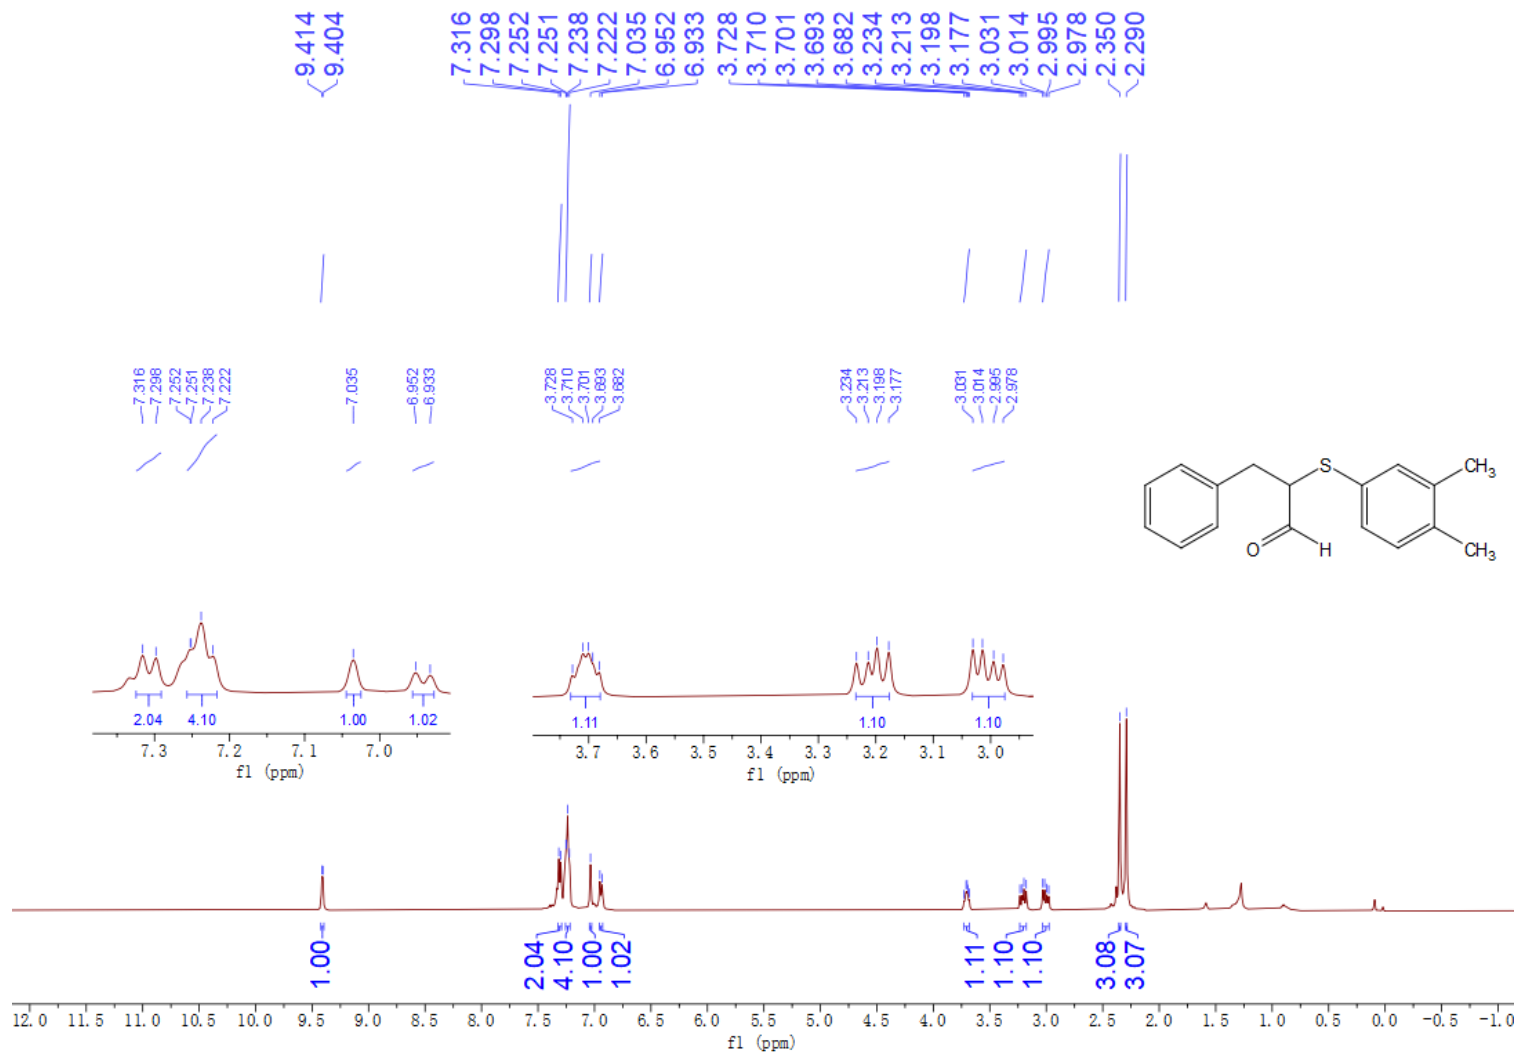

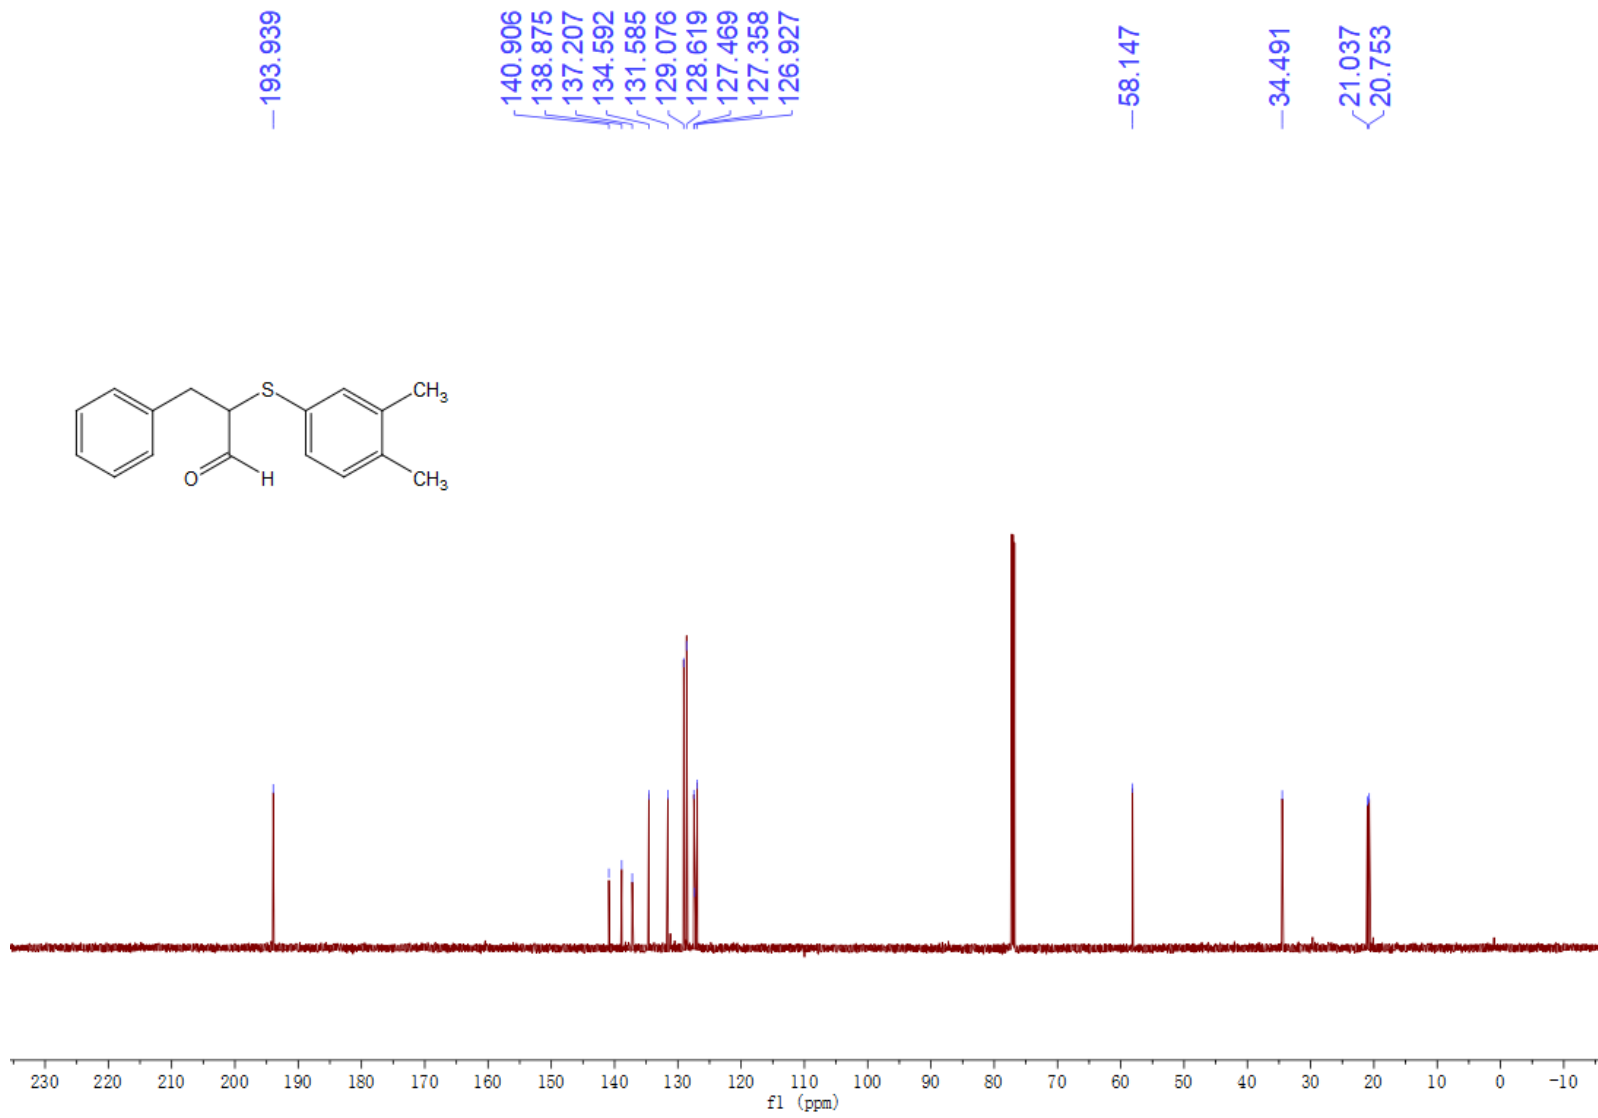



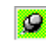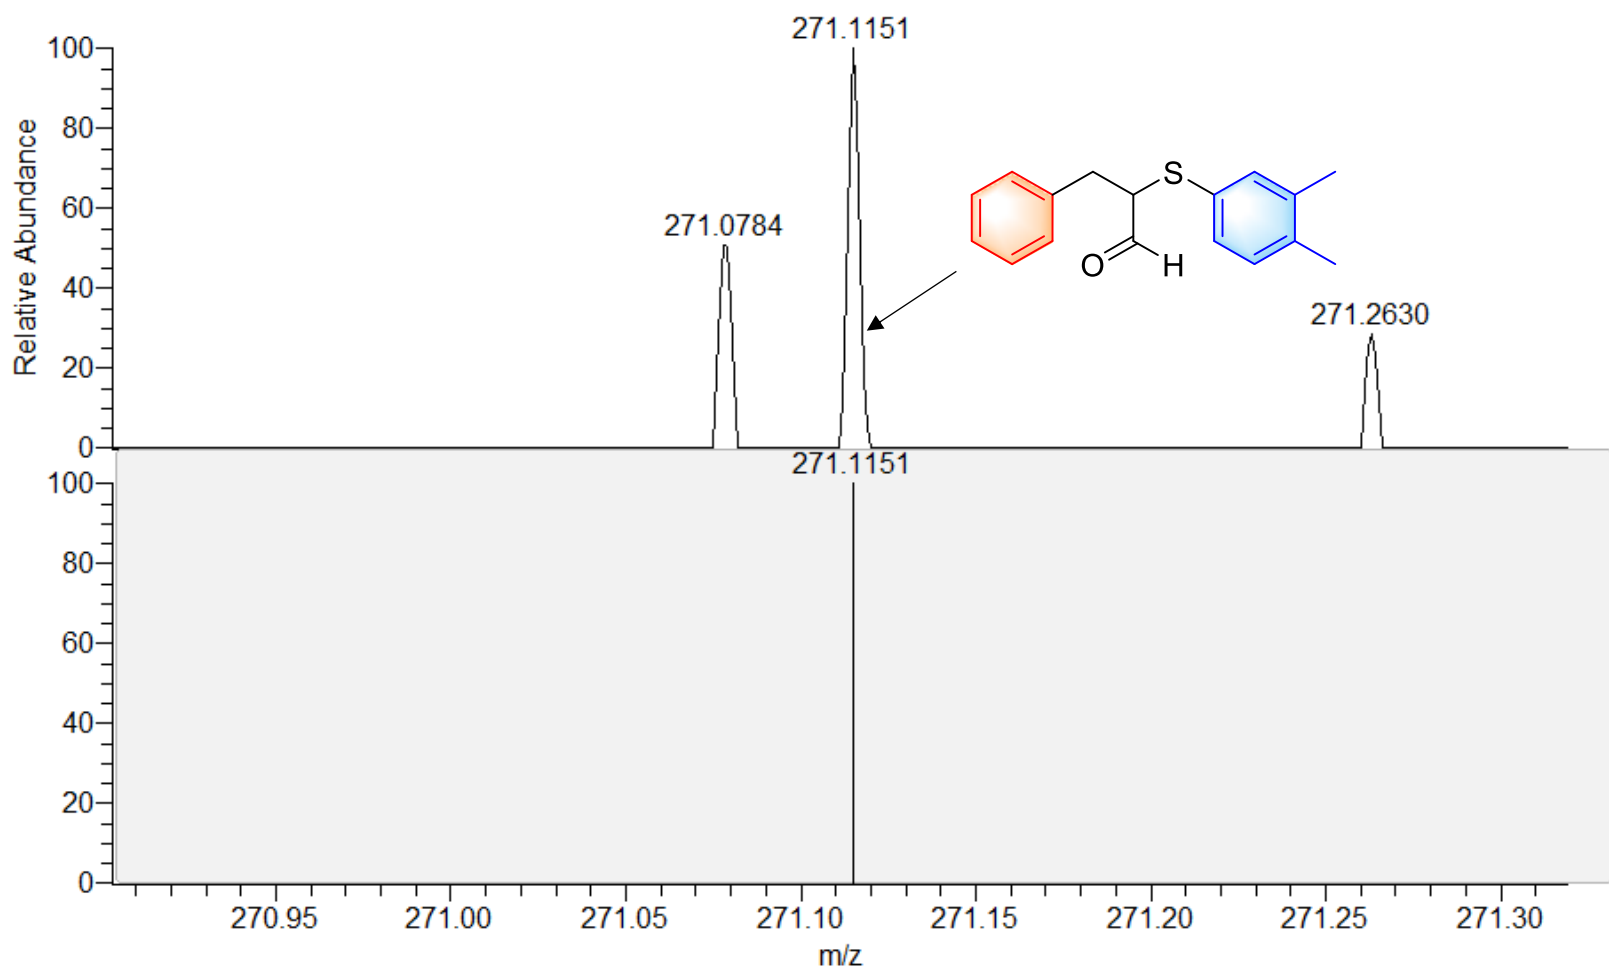

NL:  
4.16E5  
MOUDAN-M8#87  
RT: 0.39 AV: 1 T:  
FTMS + p ESI Full  
lock ms  
[75.0000-750.0000]

NL:  
7.87E5  
C<sub>17</sub> H<sub>18</sub> OS +H:  
C<sub>17</sub> H<sub>19</sub> O<sub>1</sub> S<sub>1</sub>  
pa Chrg 1

**2-((4-fluorophenyl)thio)-3-phenylpropanal (3bf)**

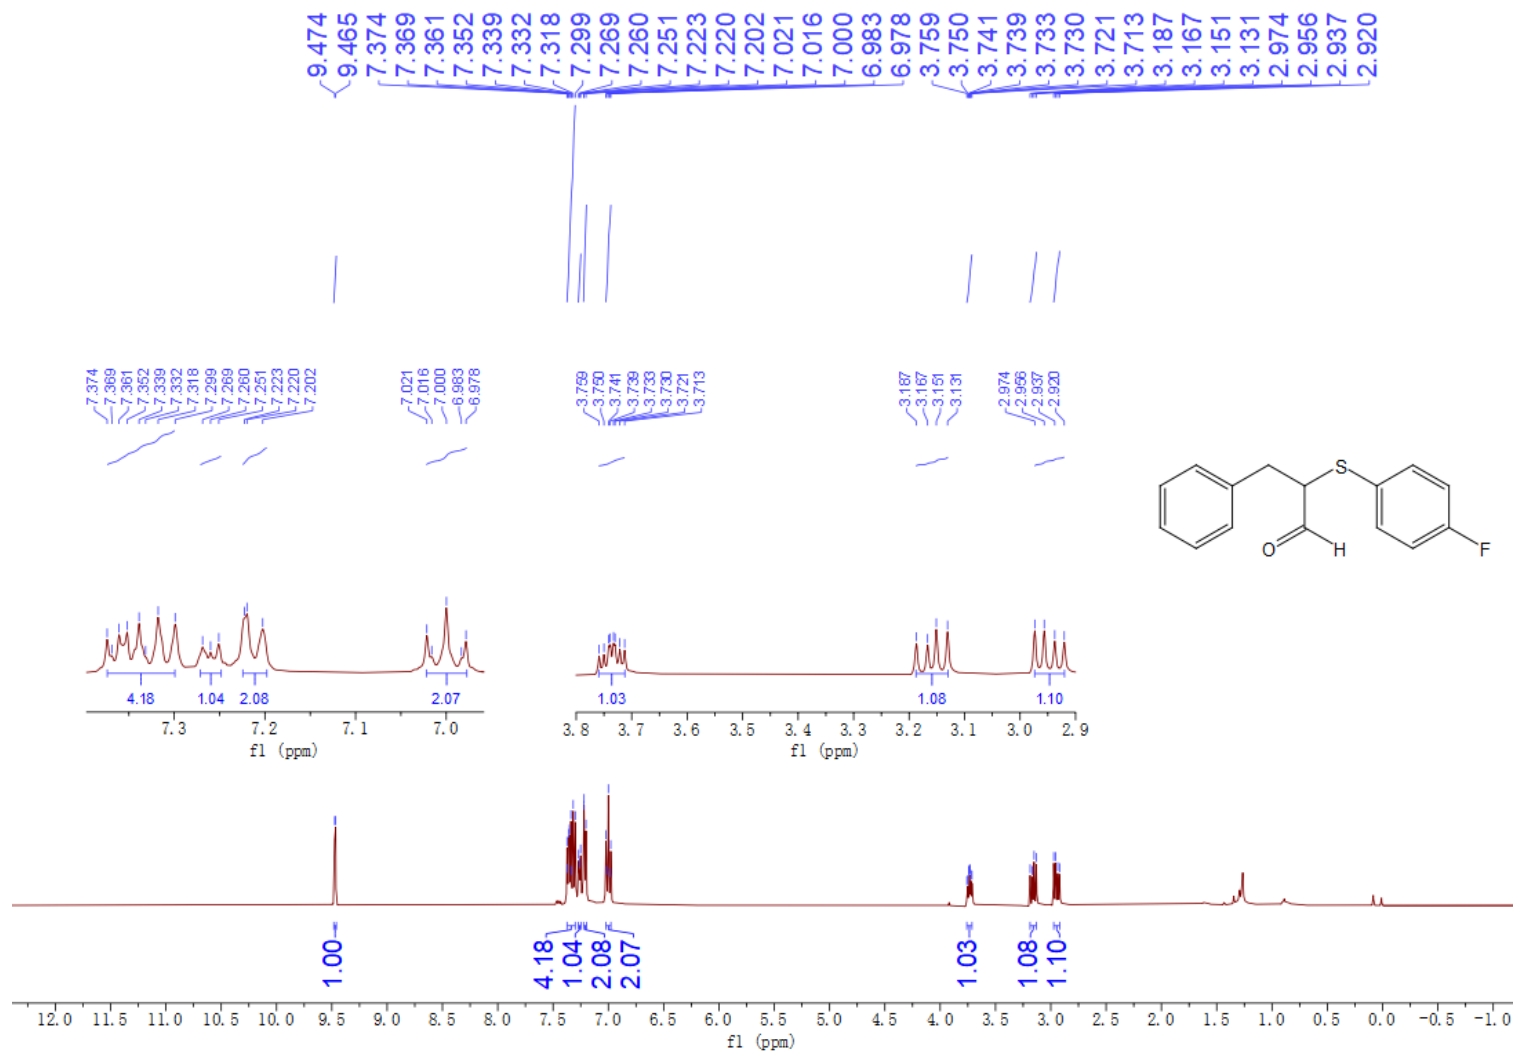

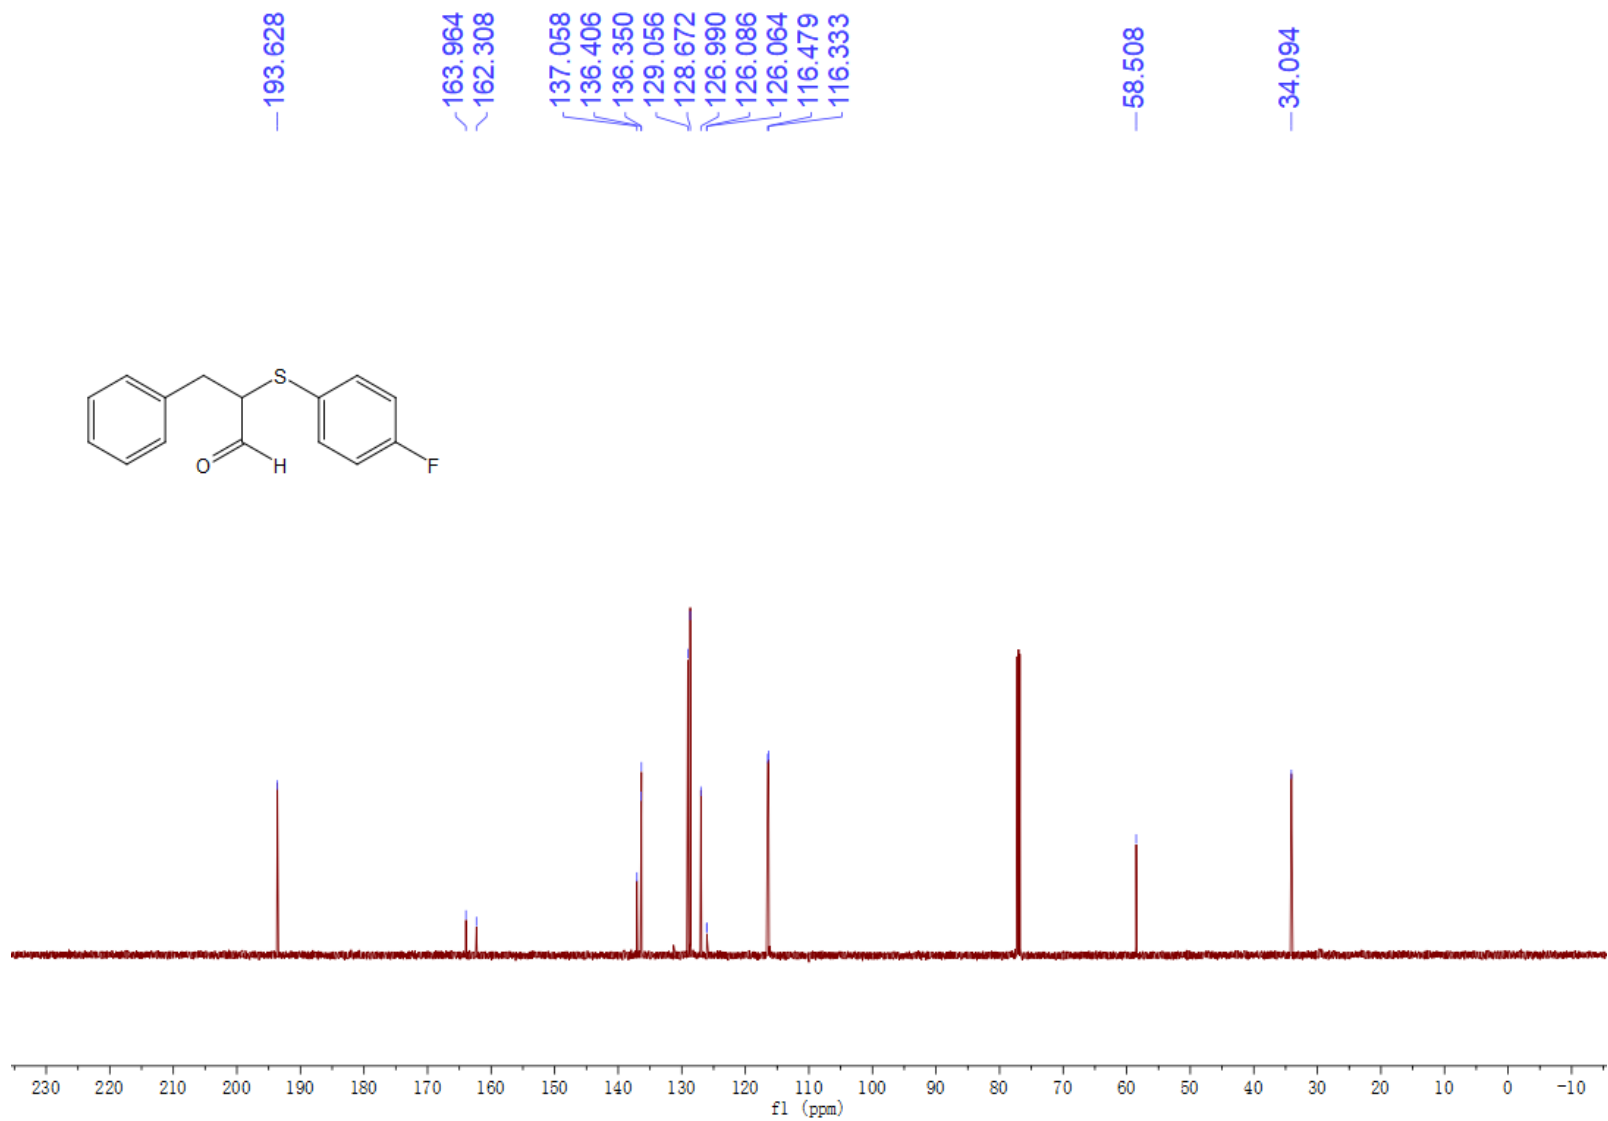

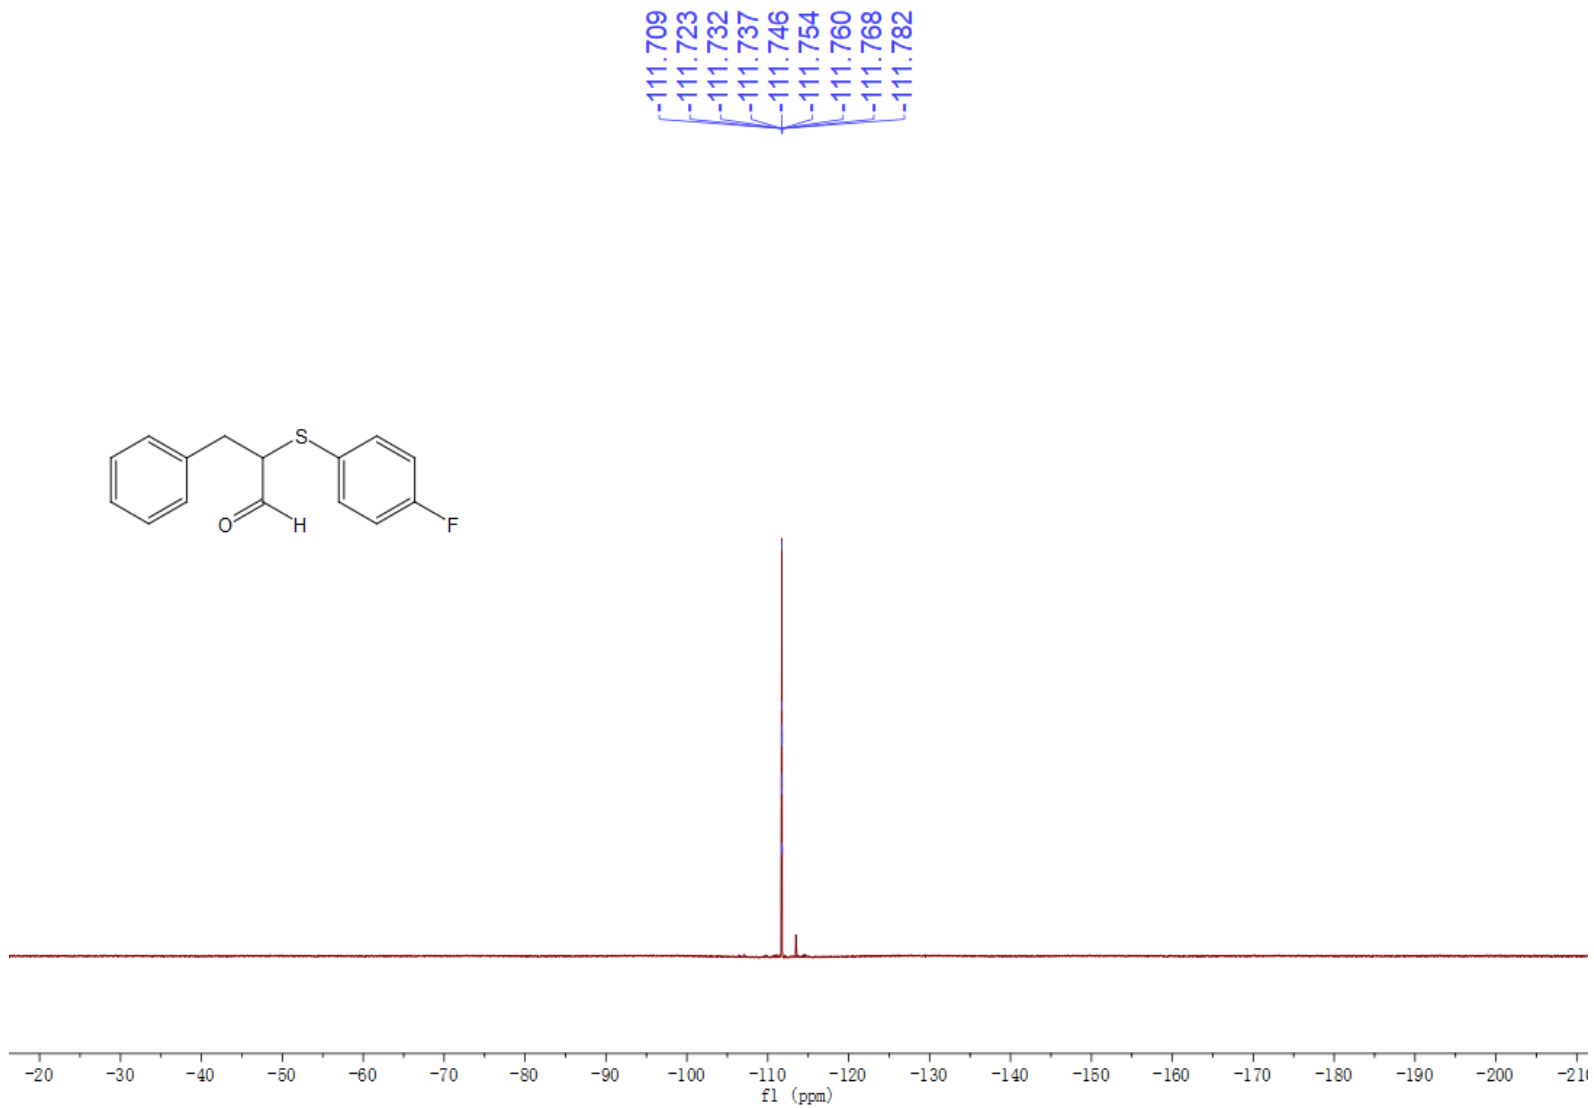

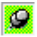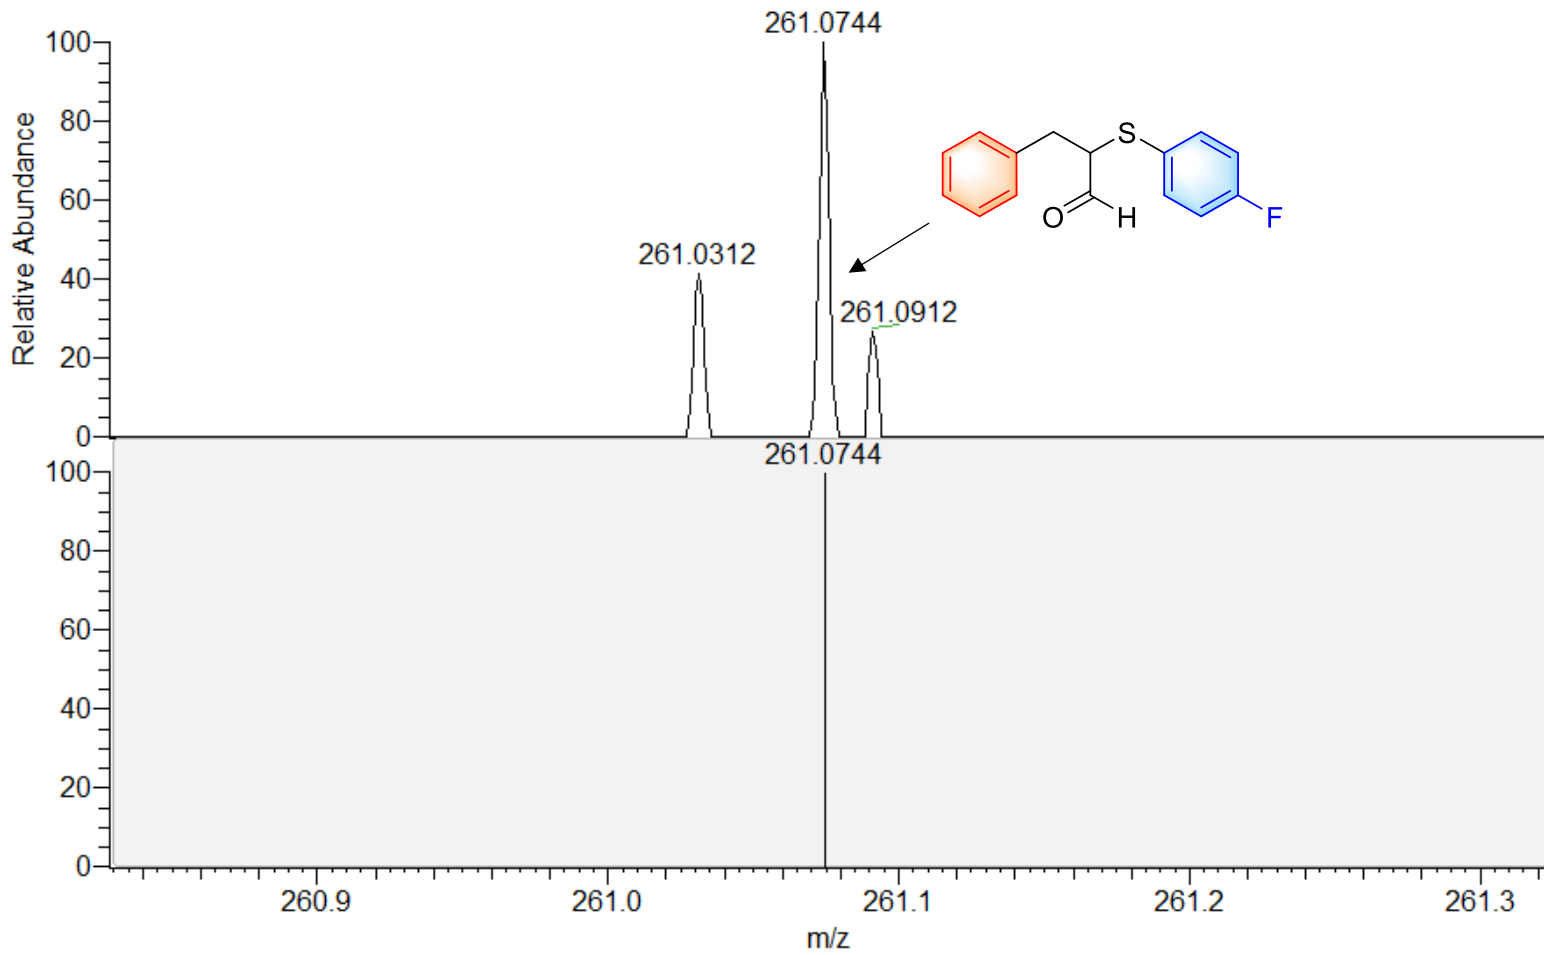

NL:  
4.99E5  
MOUDAN-M8#39  
RT: 0.17 AV: 1 T:  
FTMS + p ESI Full  
lock ms  
[75.0000-750.0000]

NL:  
8.05E5  
C<sub>15</sub> H<sub>13</sub> FOS +H:  
C<sub>15</sub> H<sub>14</sub> F<sub>1</sub> O<sub>1</sub> S<sub>1</sub>  
pa Chrg 1

**2-((4-bromophenyl)thio)-3-phenylpropanal (3bg)**

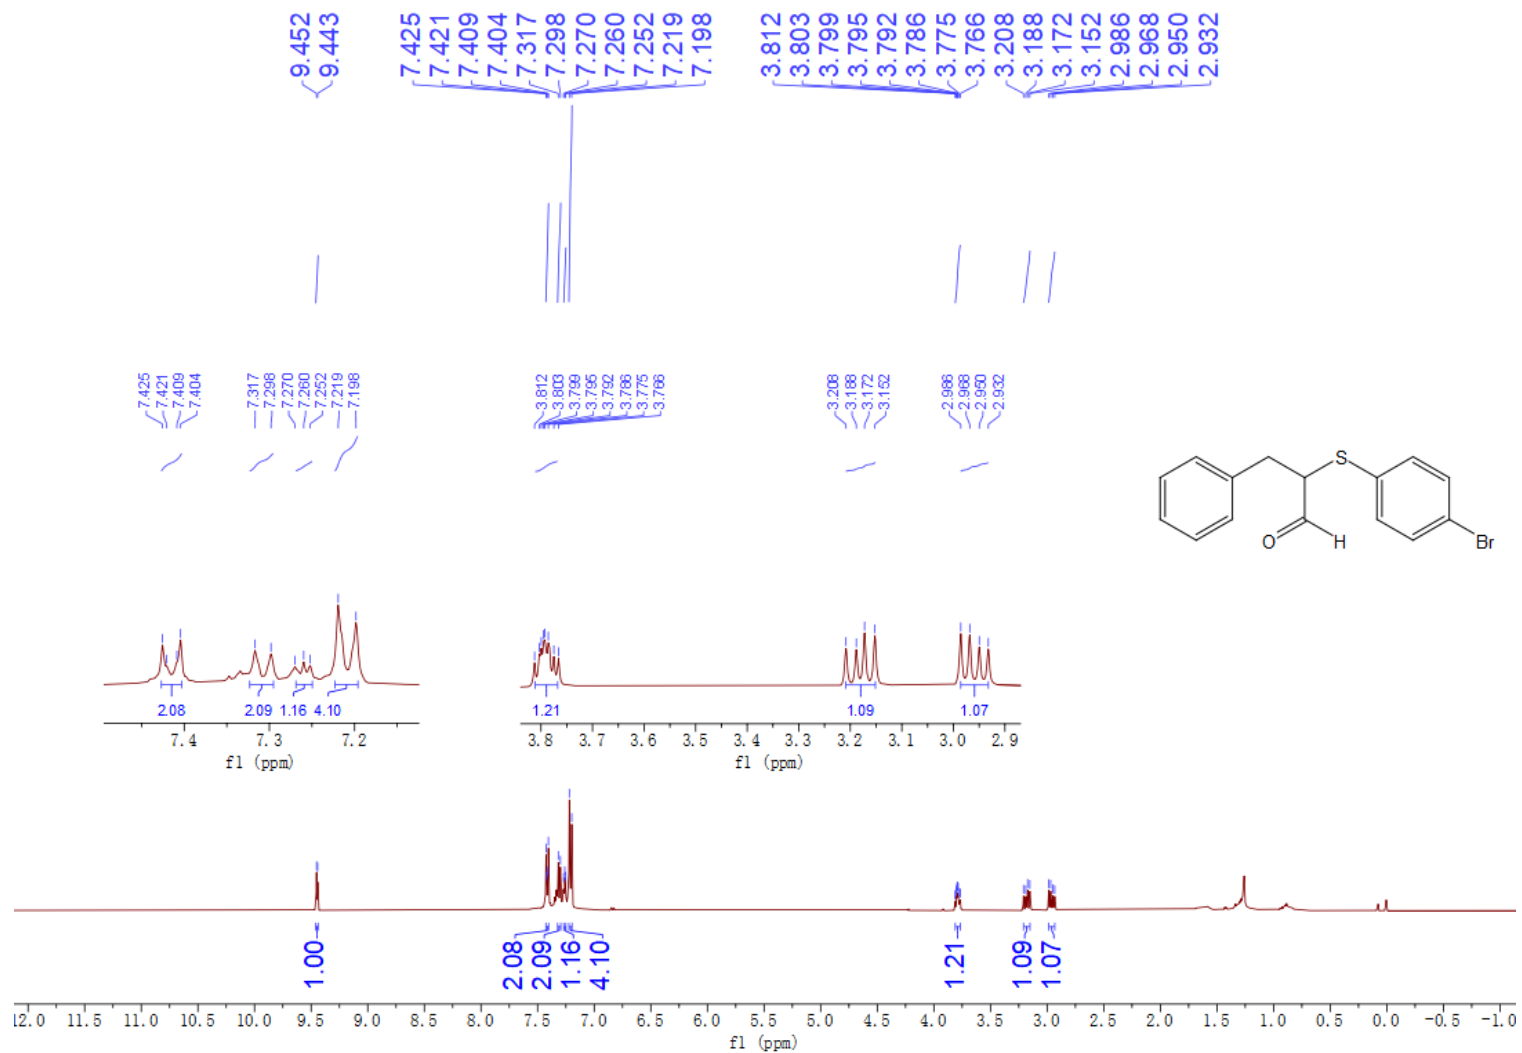

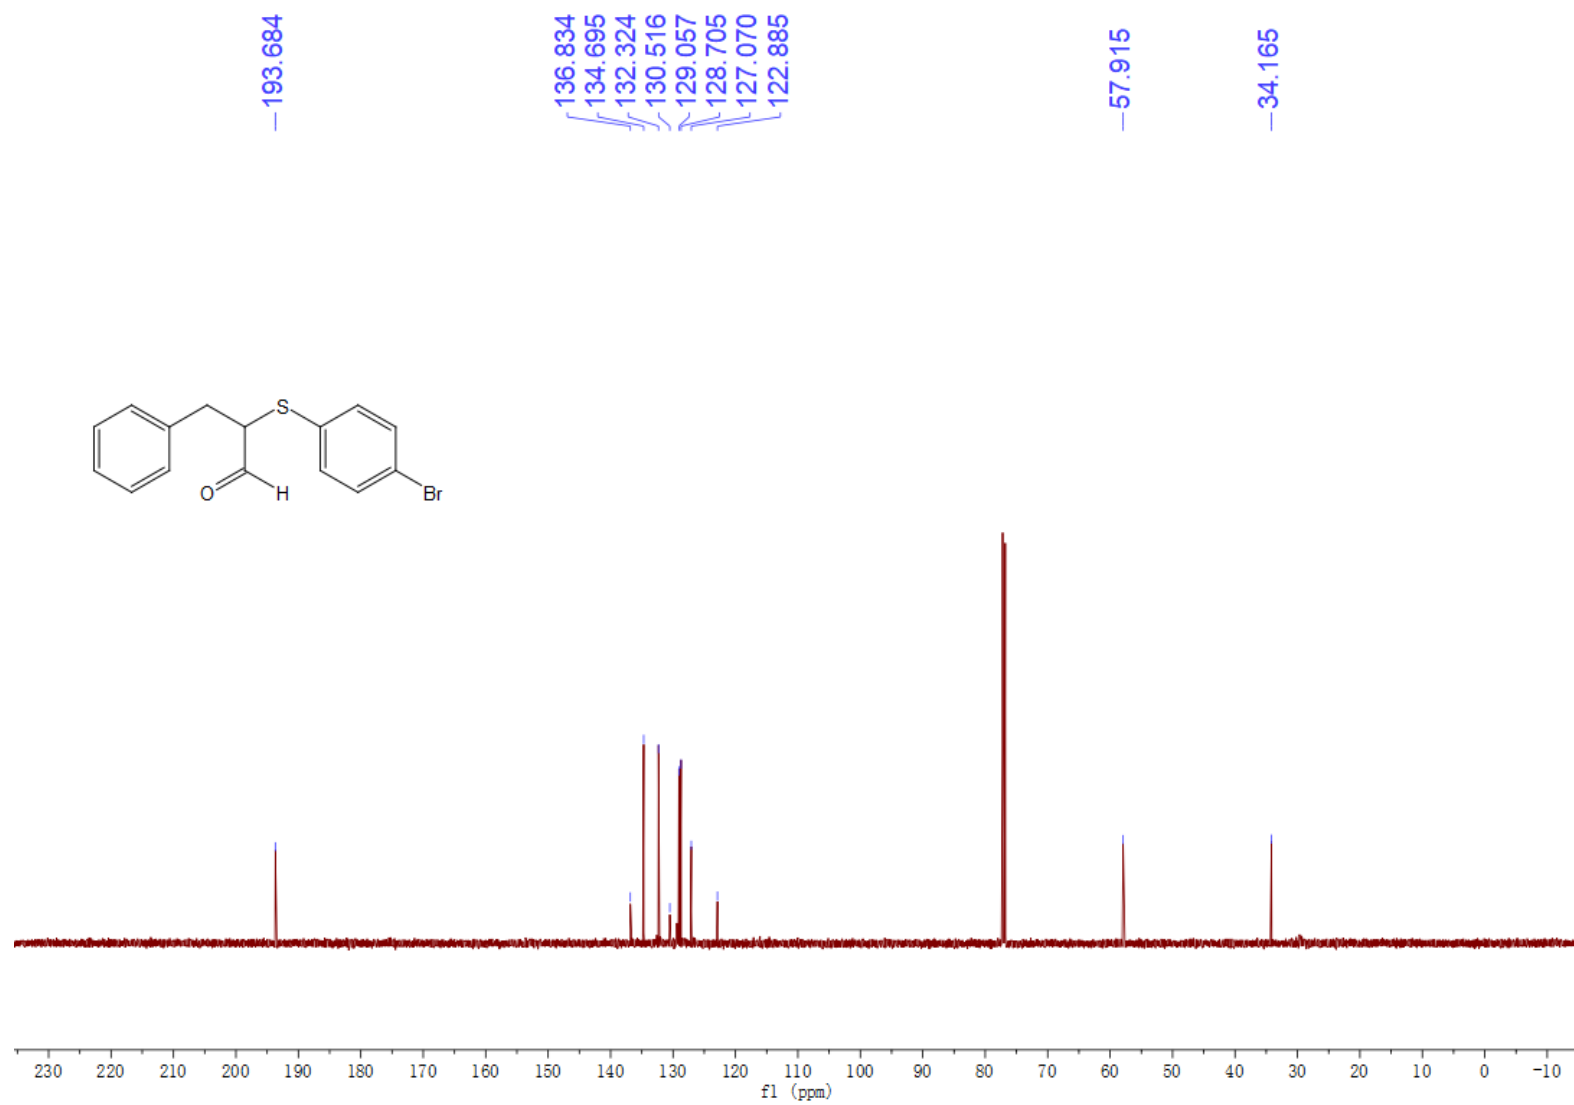

**2-((3-chlorophenyl)thio)-3-phenylpropanal (3bh)**

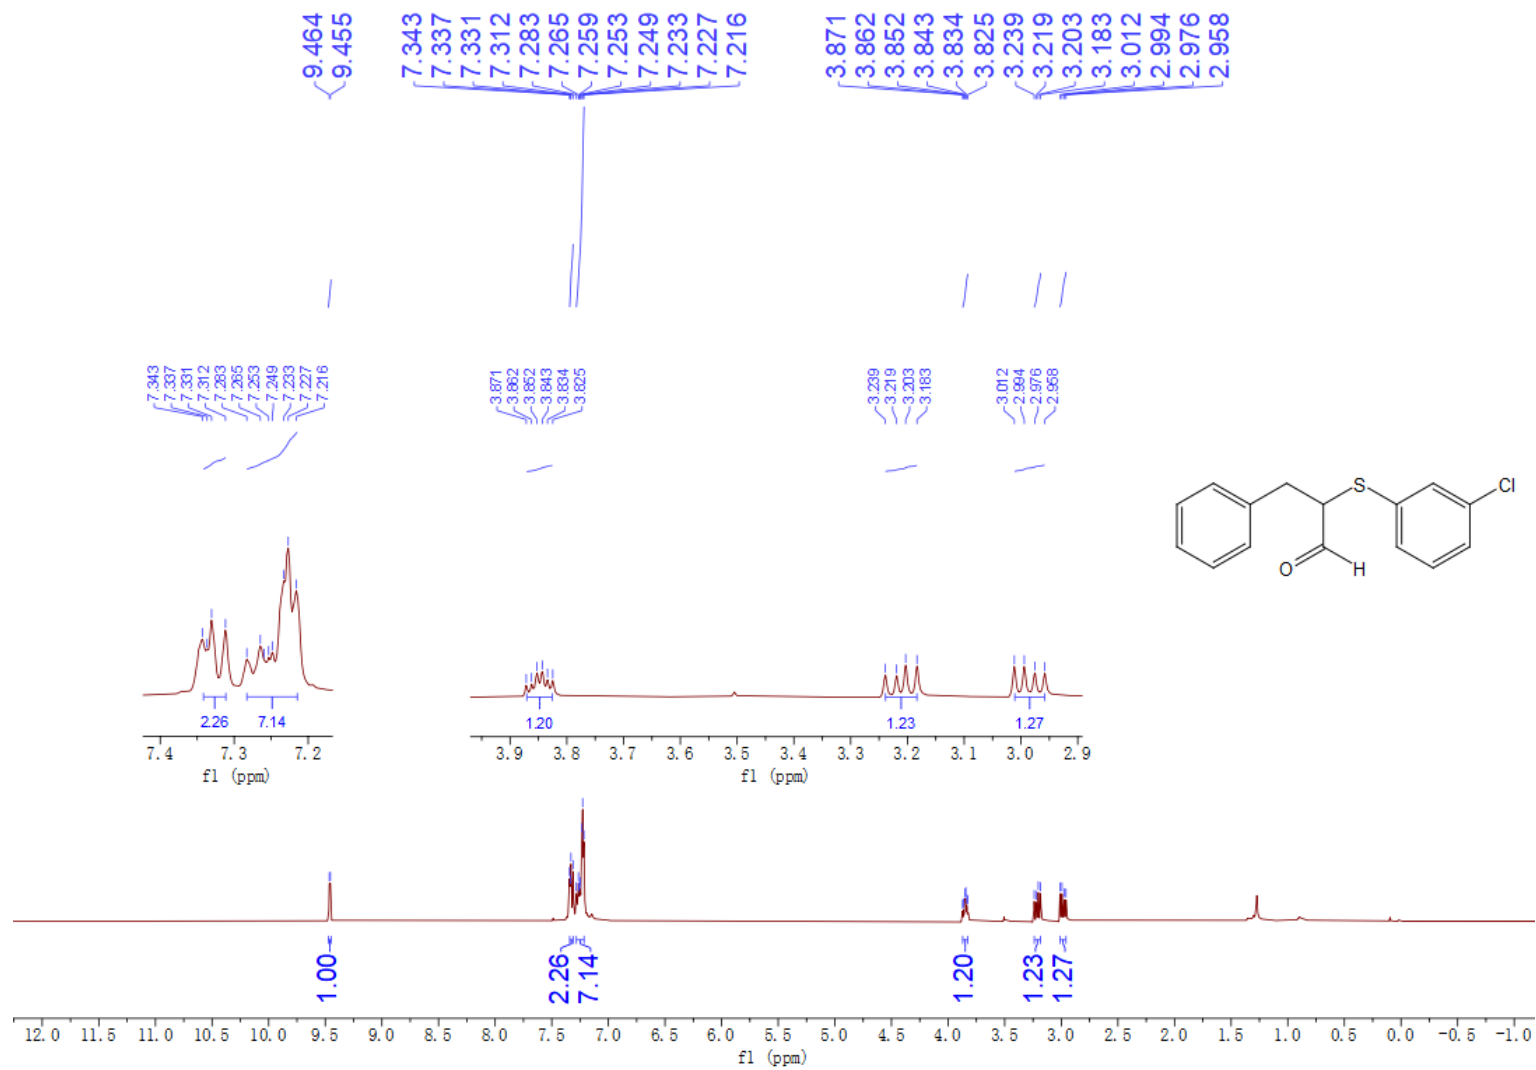



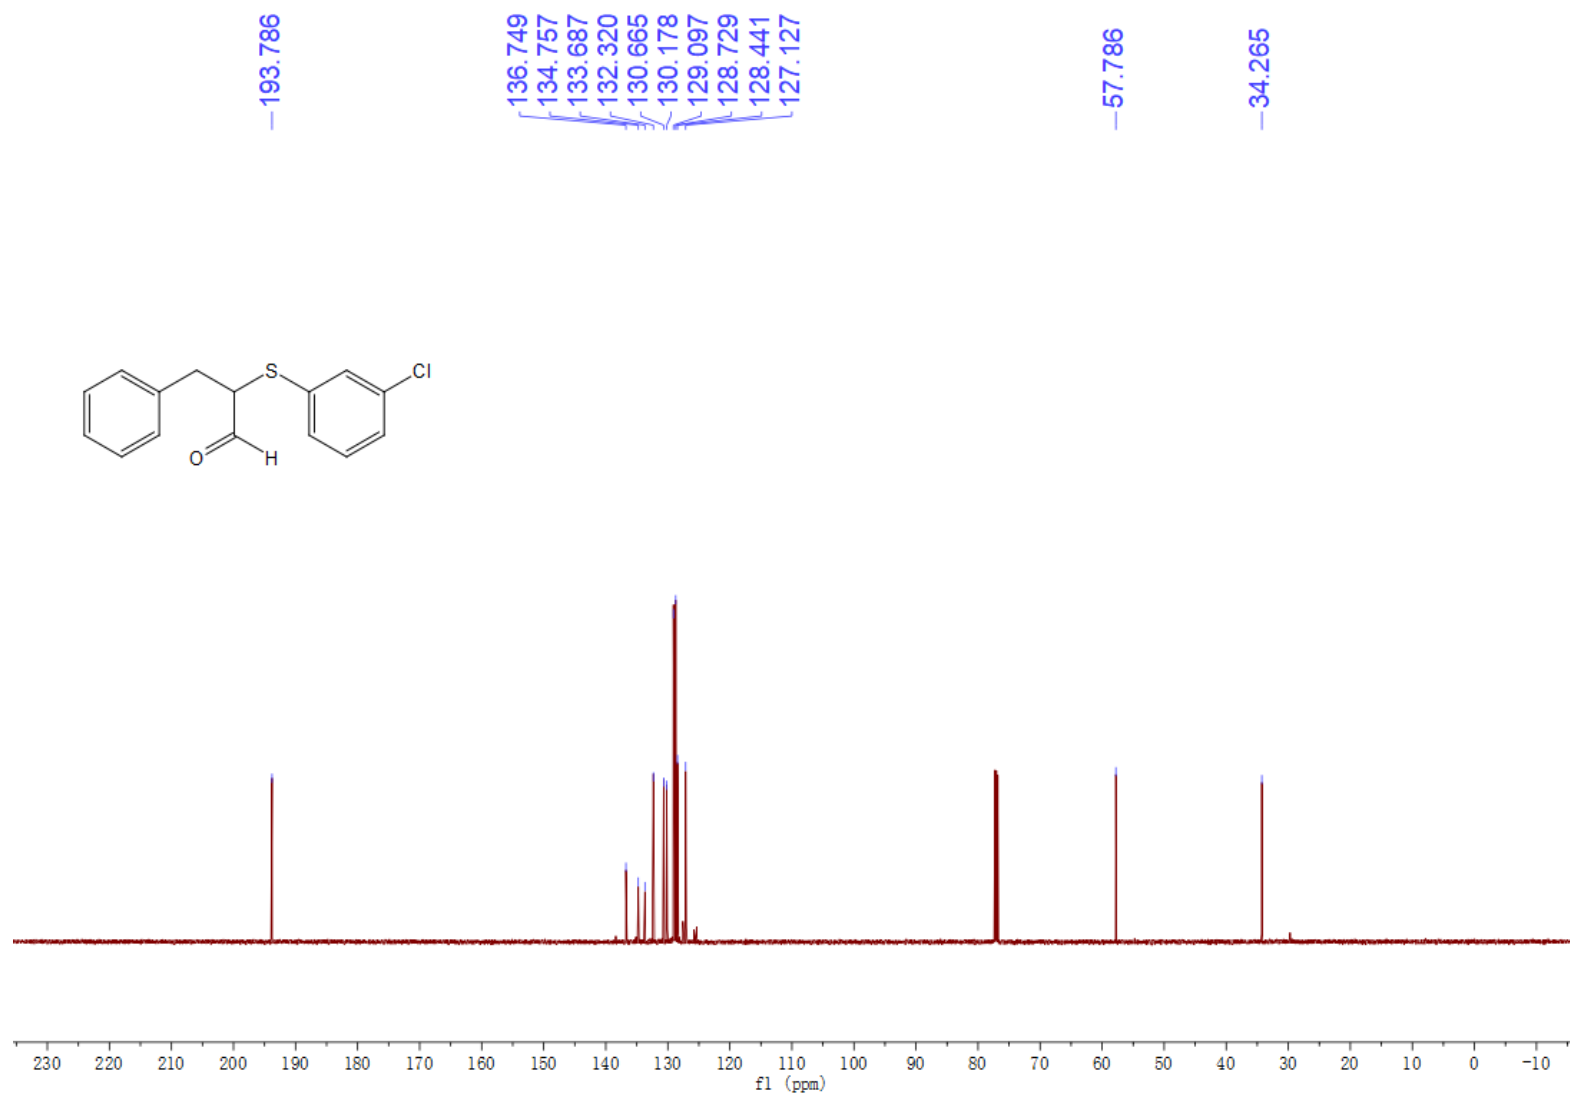

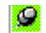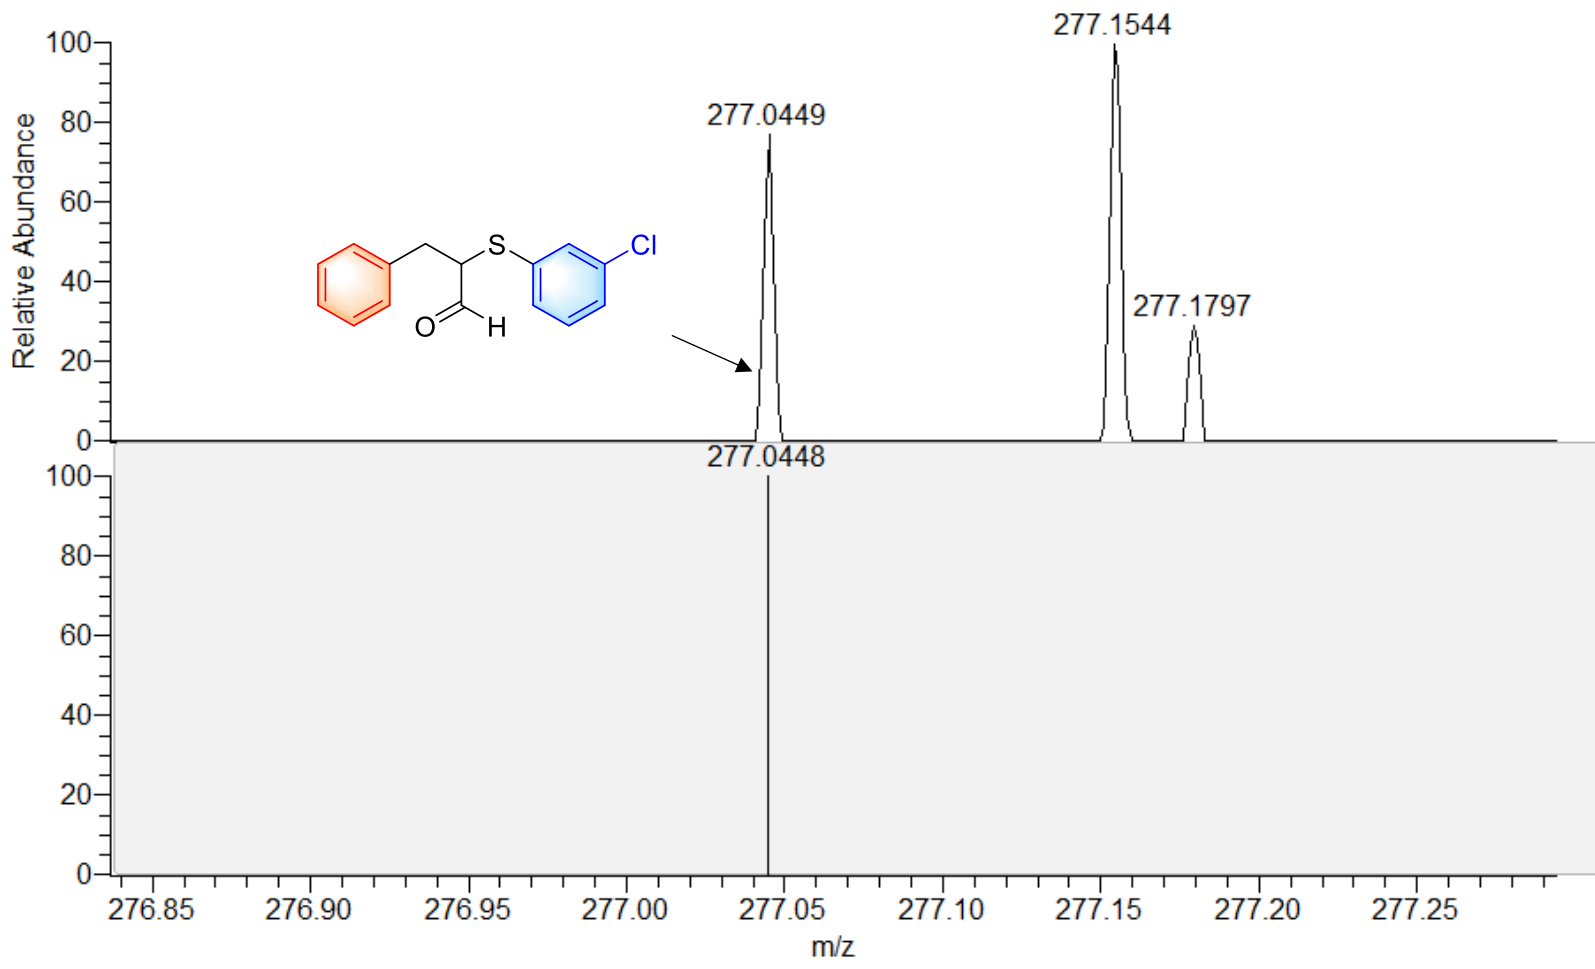

NL:  
1.91E5  
MOUDAN-M9#17  
RT: 0.08 AV: 1 T:  
FTMS + p ESI Full  
lock ms  
[100.0000-  
750.0000]

NL:  
6.10E5  
C<sub>15</sub> H<sub>13</sub> ClOS +H:  
C<sub>15</sub> H<sub>14</sub> Cl<sub>1</sub> O<sub>1</sub> S<sub>1</sub>  
pa Chrg 1

**2-((2-chlorophenyl)thio)-3-phenylpropanal (3bi)**

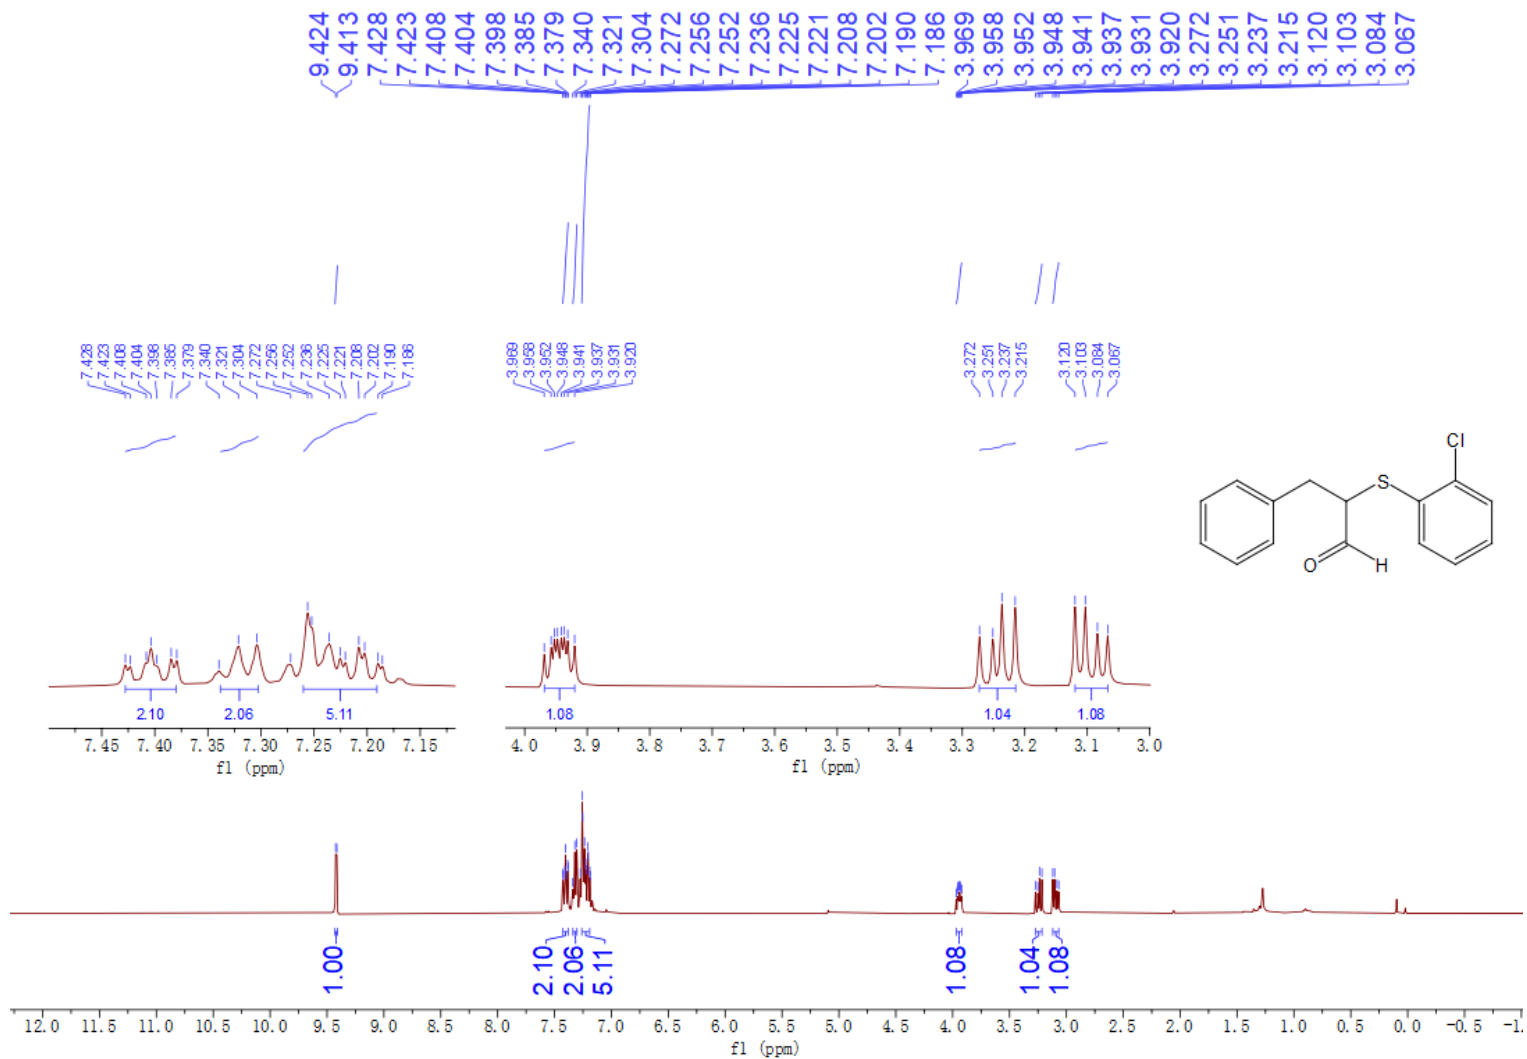

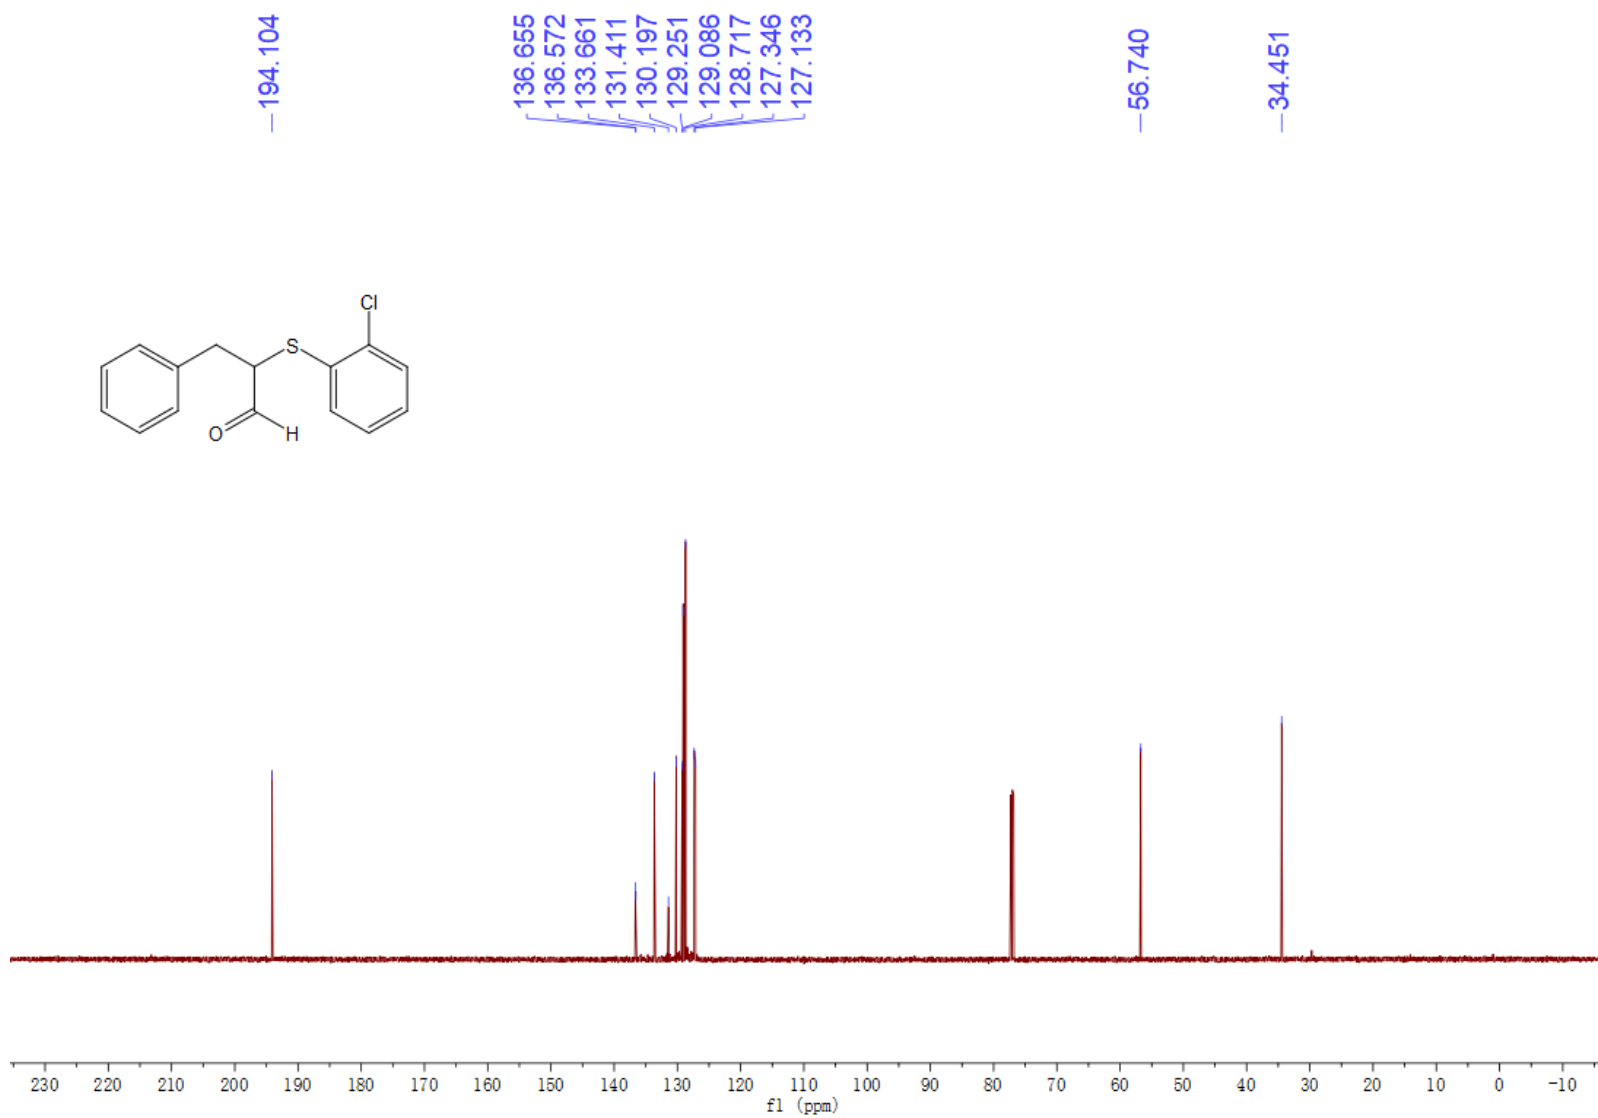

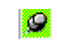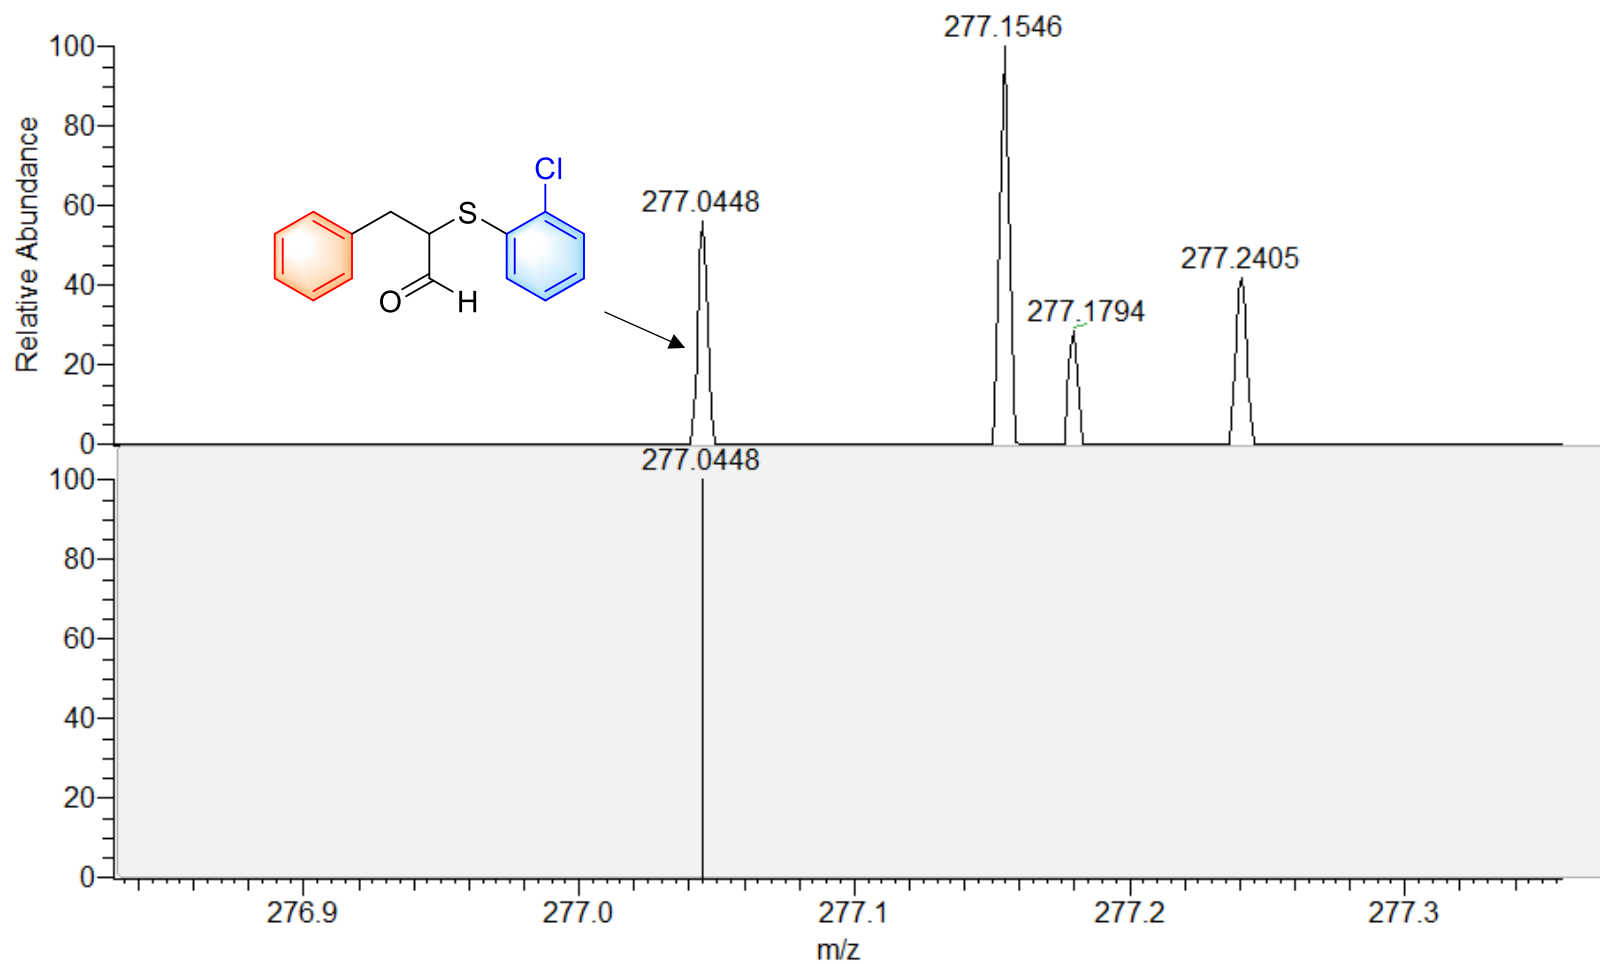

NL:  
1.97E5  
MOUDAN-M9#9  
RT: 0.04 AV: 1 T:  
FTMS + p ESI Full  
lock ms  
[100.0000-  
750.0000]

NL:  
6.10E5  
C<sub>15</sub> H<sub>13</sub> ClOS +H:  
C<sub>15</sub> H<sub>14</sub> Cl<sub>1</sub> O<sub>1</sub> S<sub>1</sub>  
pa Chrg 1

### 2-((4-nitrophenyl)thio)-3-phenylpropanal (3bj)

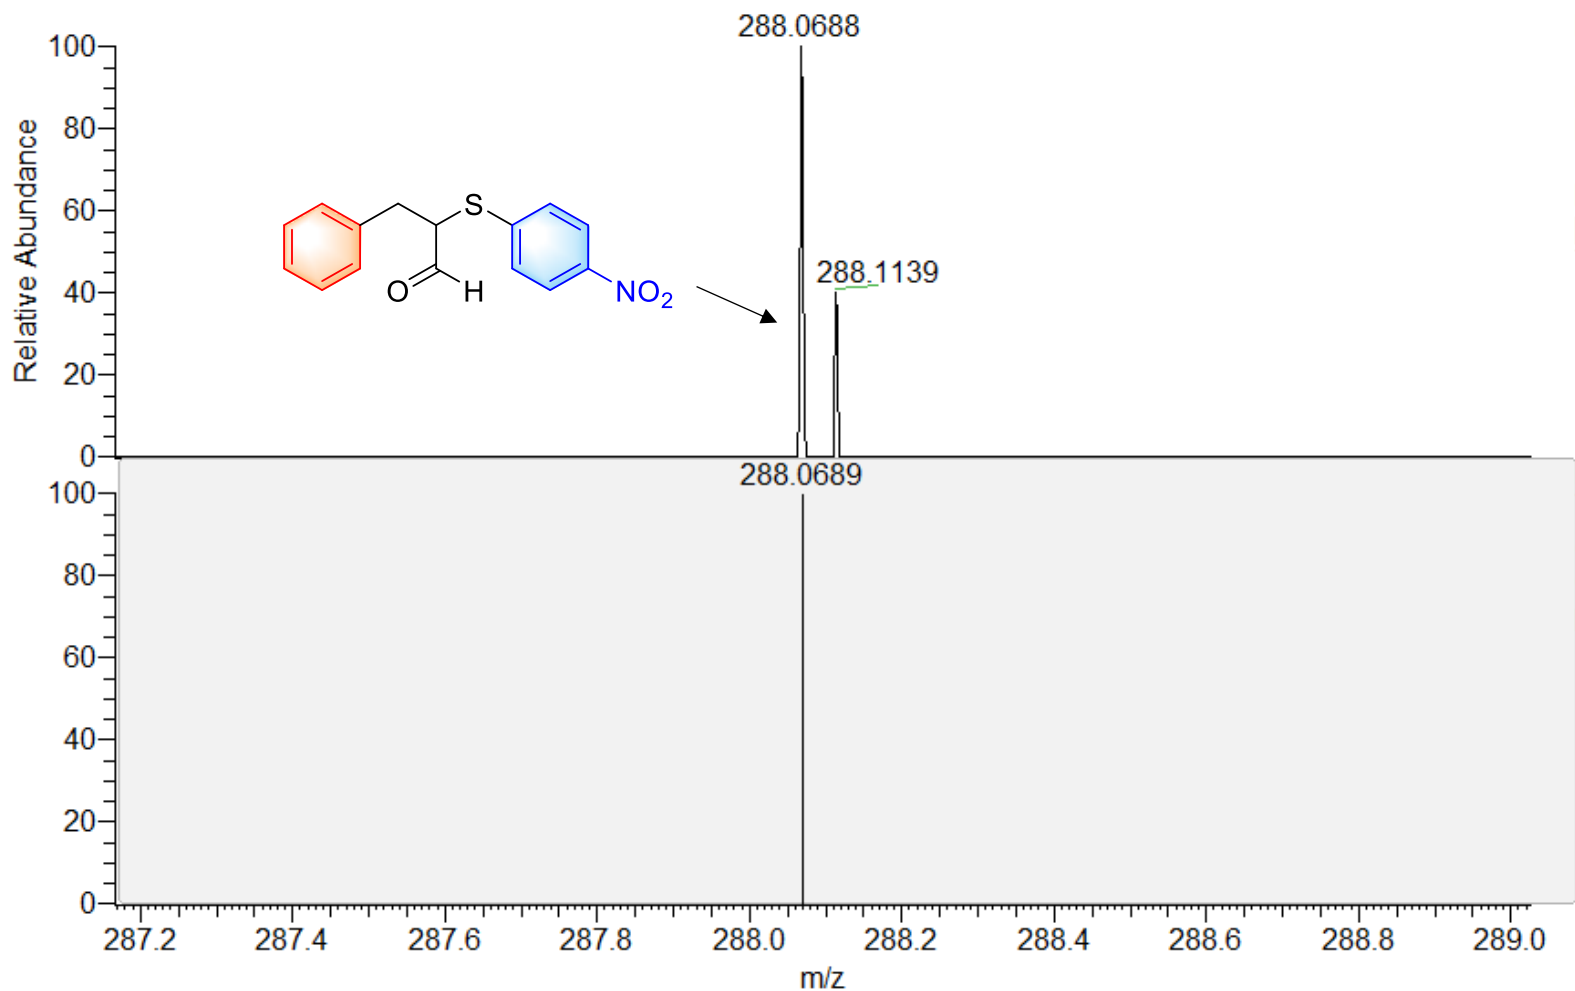

NL:  
1.35E5  
MOUDAN-M9#57  
RT: 0.25 AV: 1 T:  
FTMS + p ESI Full  
lock ms  
[100.0000-  
750.0000]

NL:  
7.98E5  
C<sub>15</sub> H<sub>13</sub> NO<sub>3</sub> S +H:  
C<sub>15</sub> H<sub>14</sub> N<sub>1</sub> O<sub>3</sub> S<sub>1</sub>  
pa Chrg 1

2-((4-aminophenyl)thio)-3-phenylpropanal (3bk)

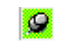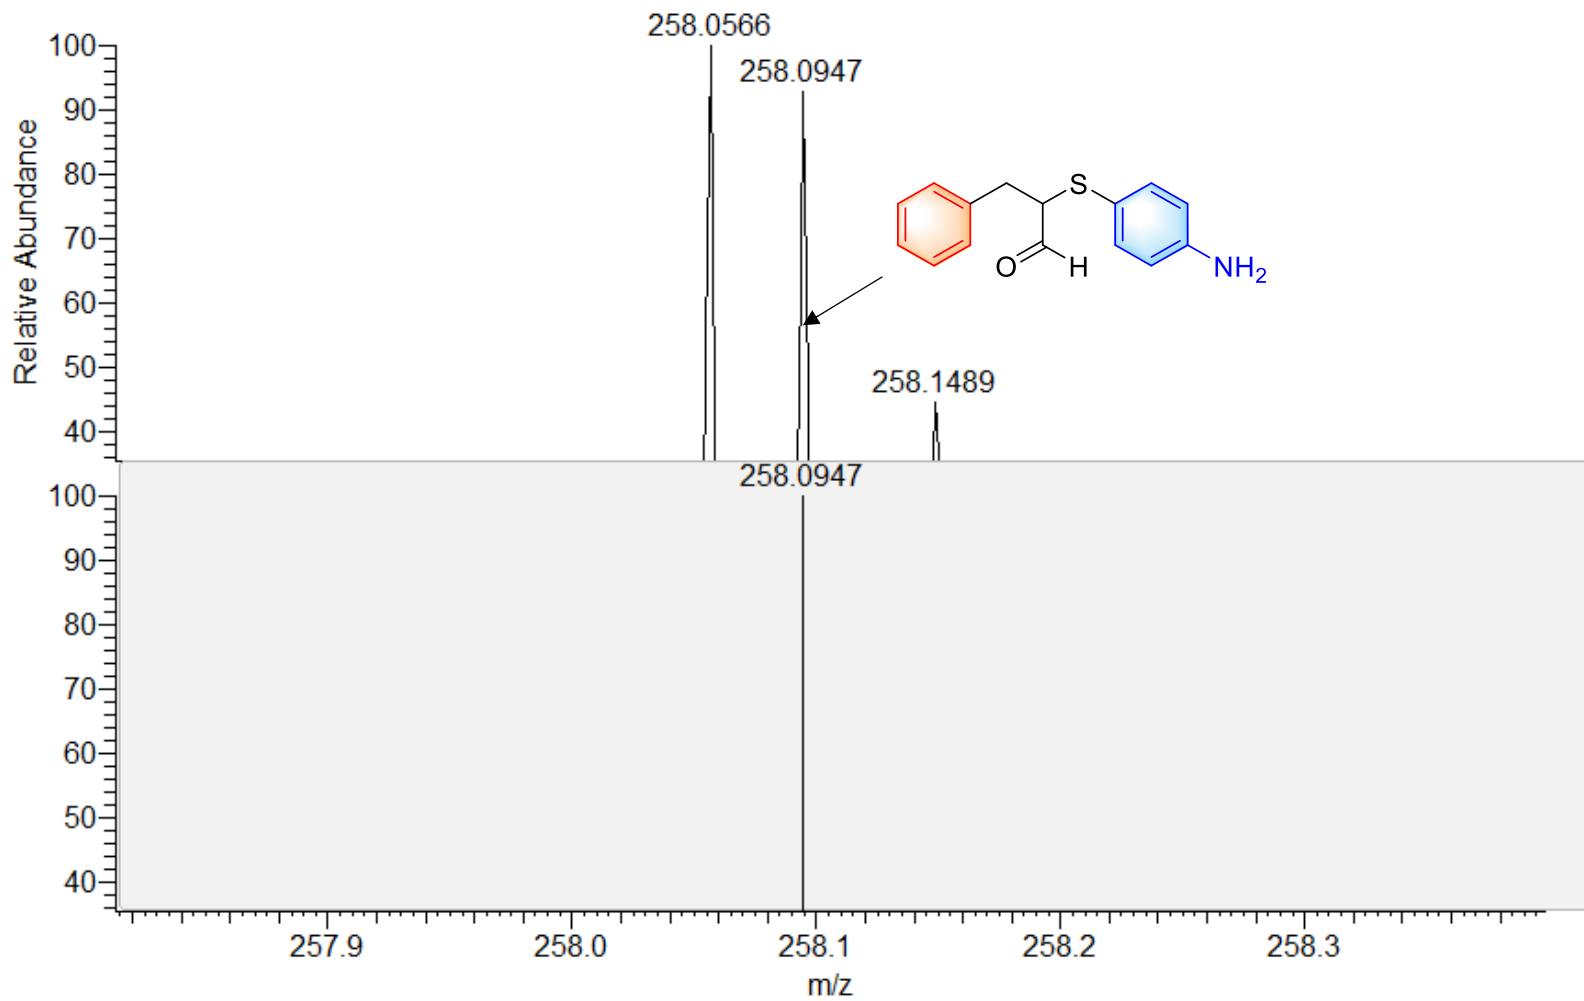

NL:  
2.33E5  
MOUDAN-M9#57  
RT: 0.25 AV: 1 T:  
FTMS + p ESI Full  
lock ms  
[100.0000-  
750.0000]

NL:  
8.01E5  
C<sub>15</sub> H<sub>15</sub> NOS +H:  
C<sub>15</sub> H<sub>16</sub> N<sub>1</sub> O<sub>1</sub> S<sub>1</sub>  
pa Chrg 1

**3-(4-ethylphenyl)-2-(*m*-tolylthio)propanal (3ca)**

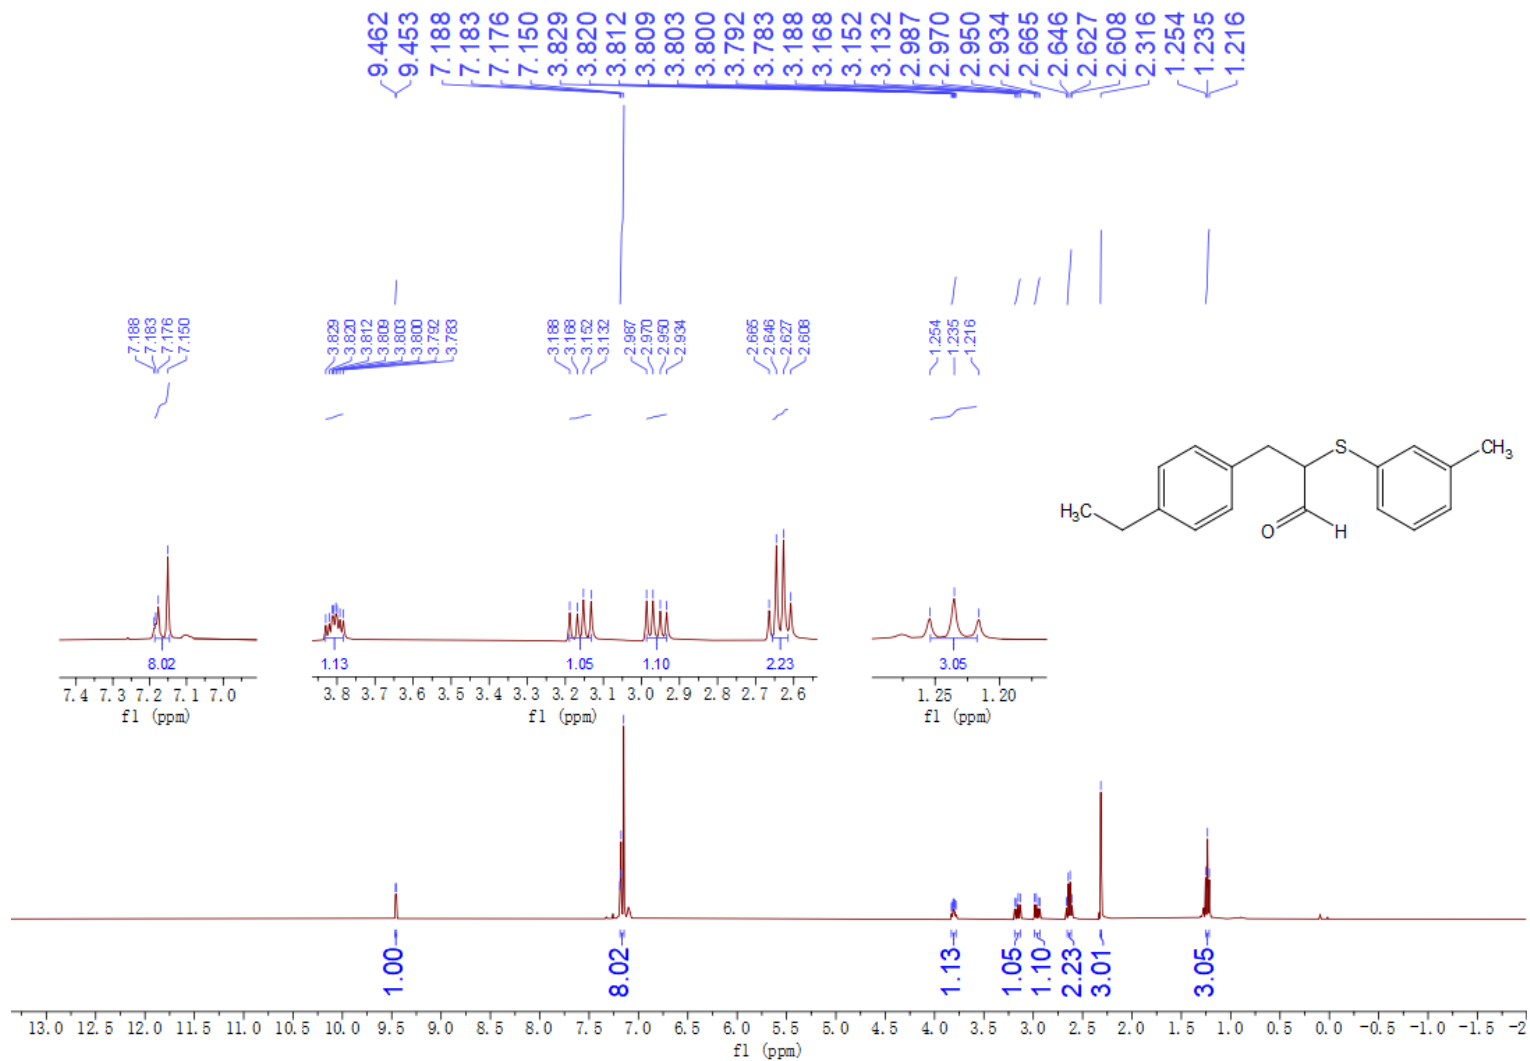



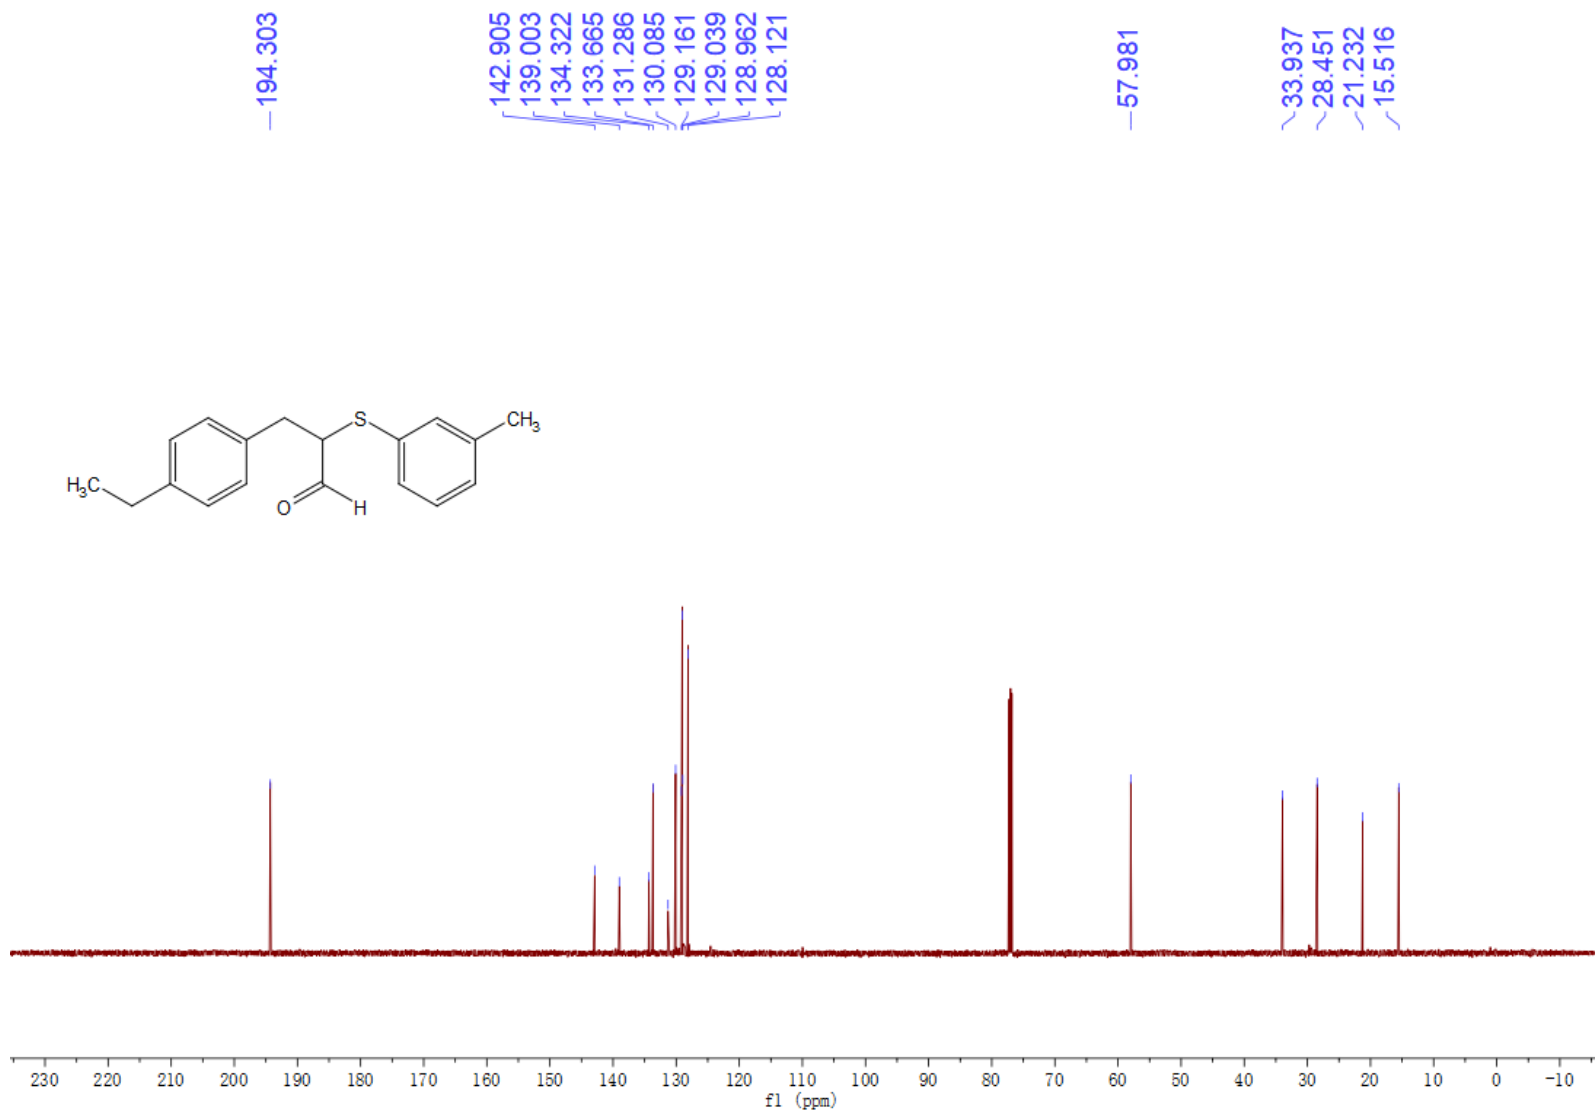

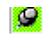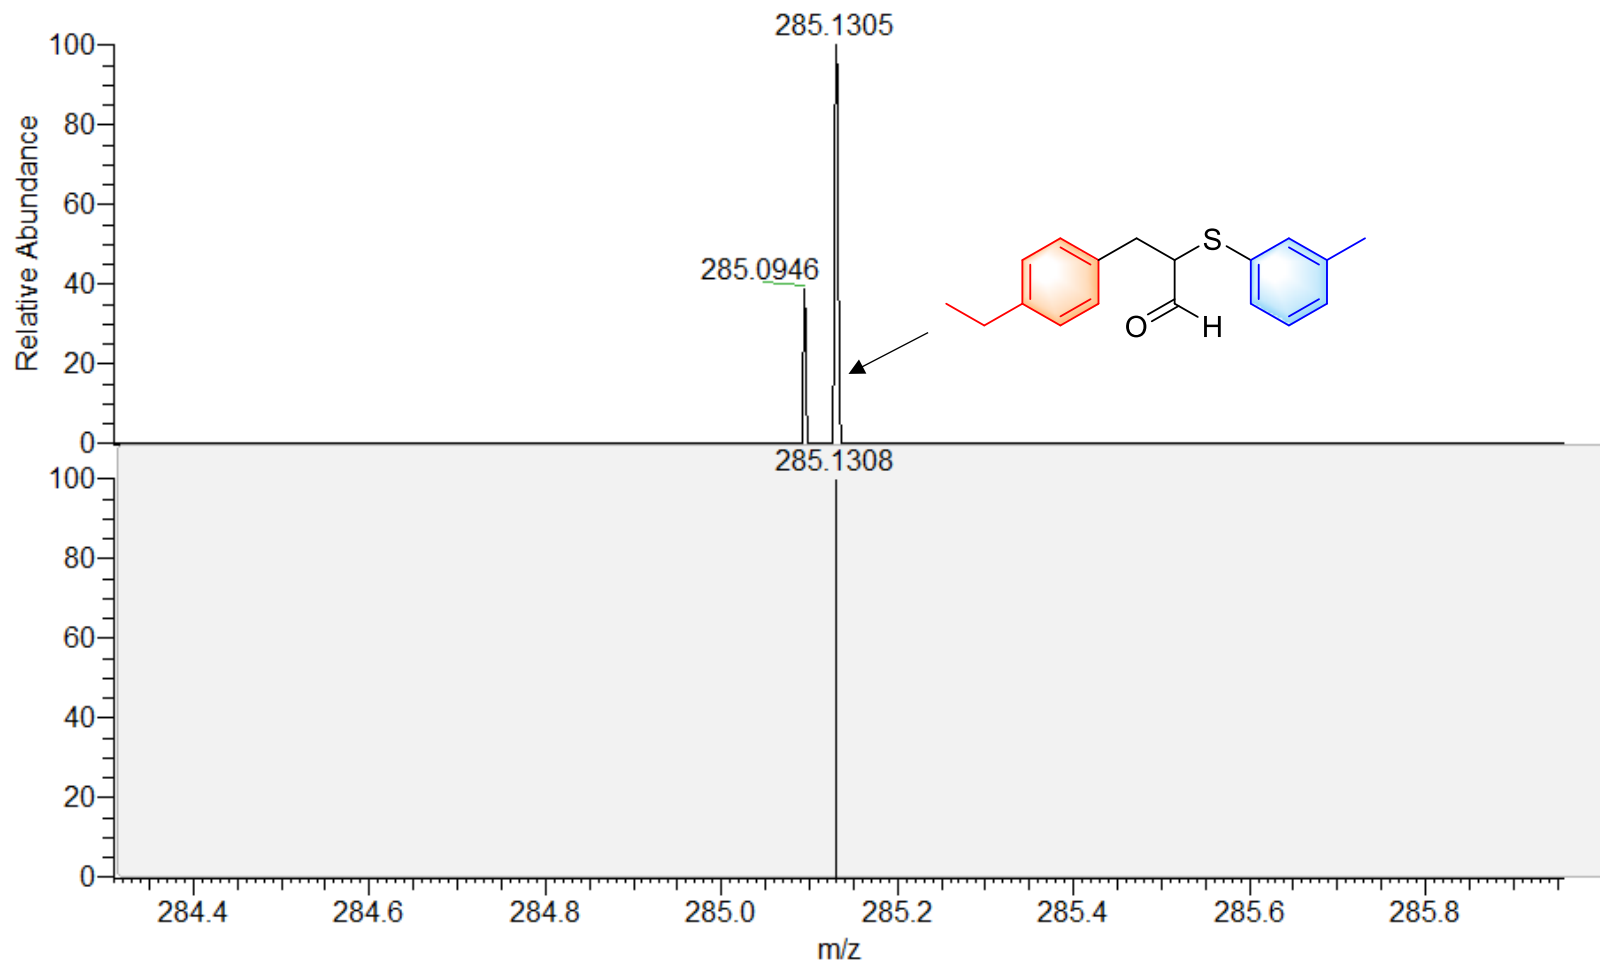

NL:  
3.53E5  
MOUDAN-M8#52  
RT: 0.23 AV: 1 T:  
FTMS + p ESI Full  
lock ms  
[75.0000-750.0000]

NL:  
7.78E5  
C<sub>18</sub> H<sub>20</sub> OS +H:  
C<sub>18</sub> H<sub>21</sub> O<sub>1</sub> S<sub>1</sub>  
pa Chrg 1

**2-((3,4-dimethylphenyl)thio)-3-(4-ethylphenyl)propanal (3cb)**

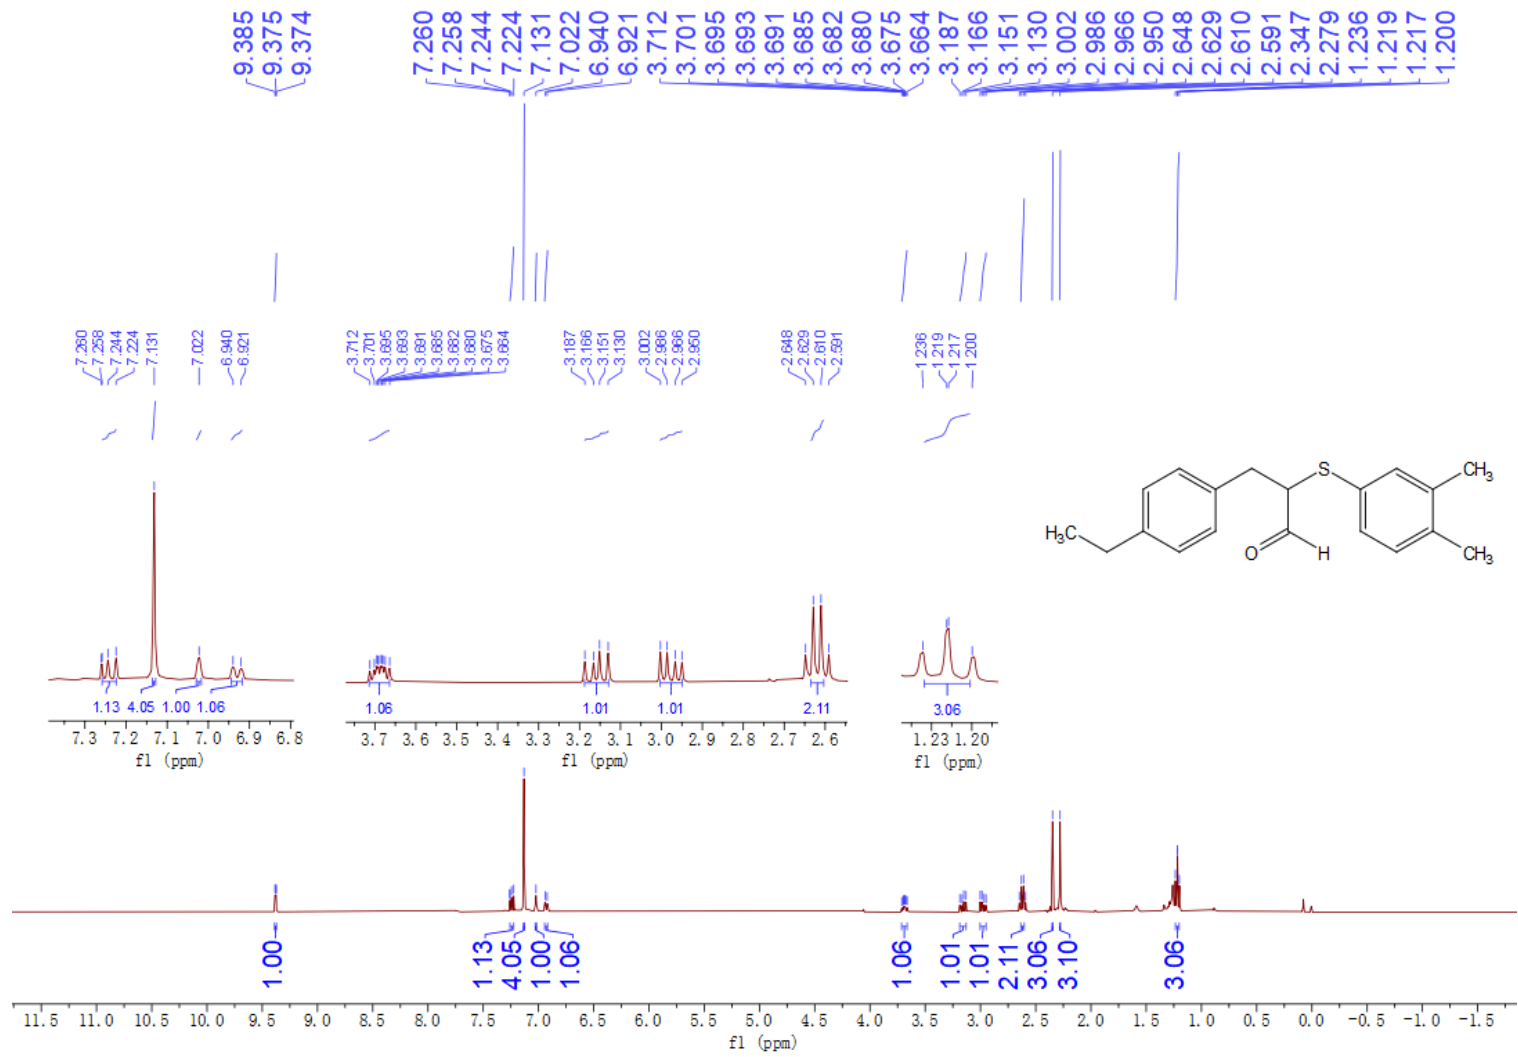

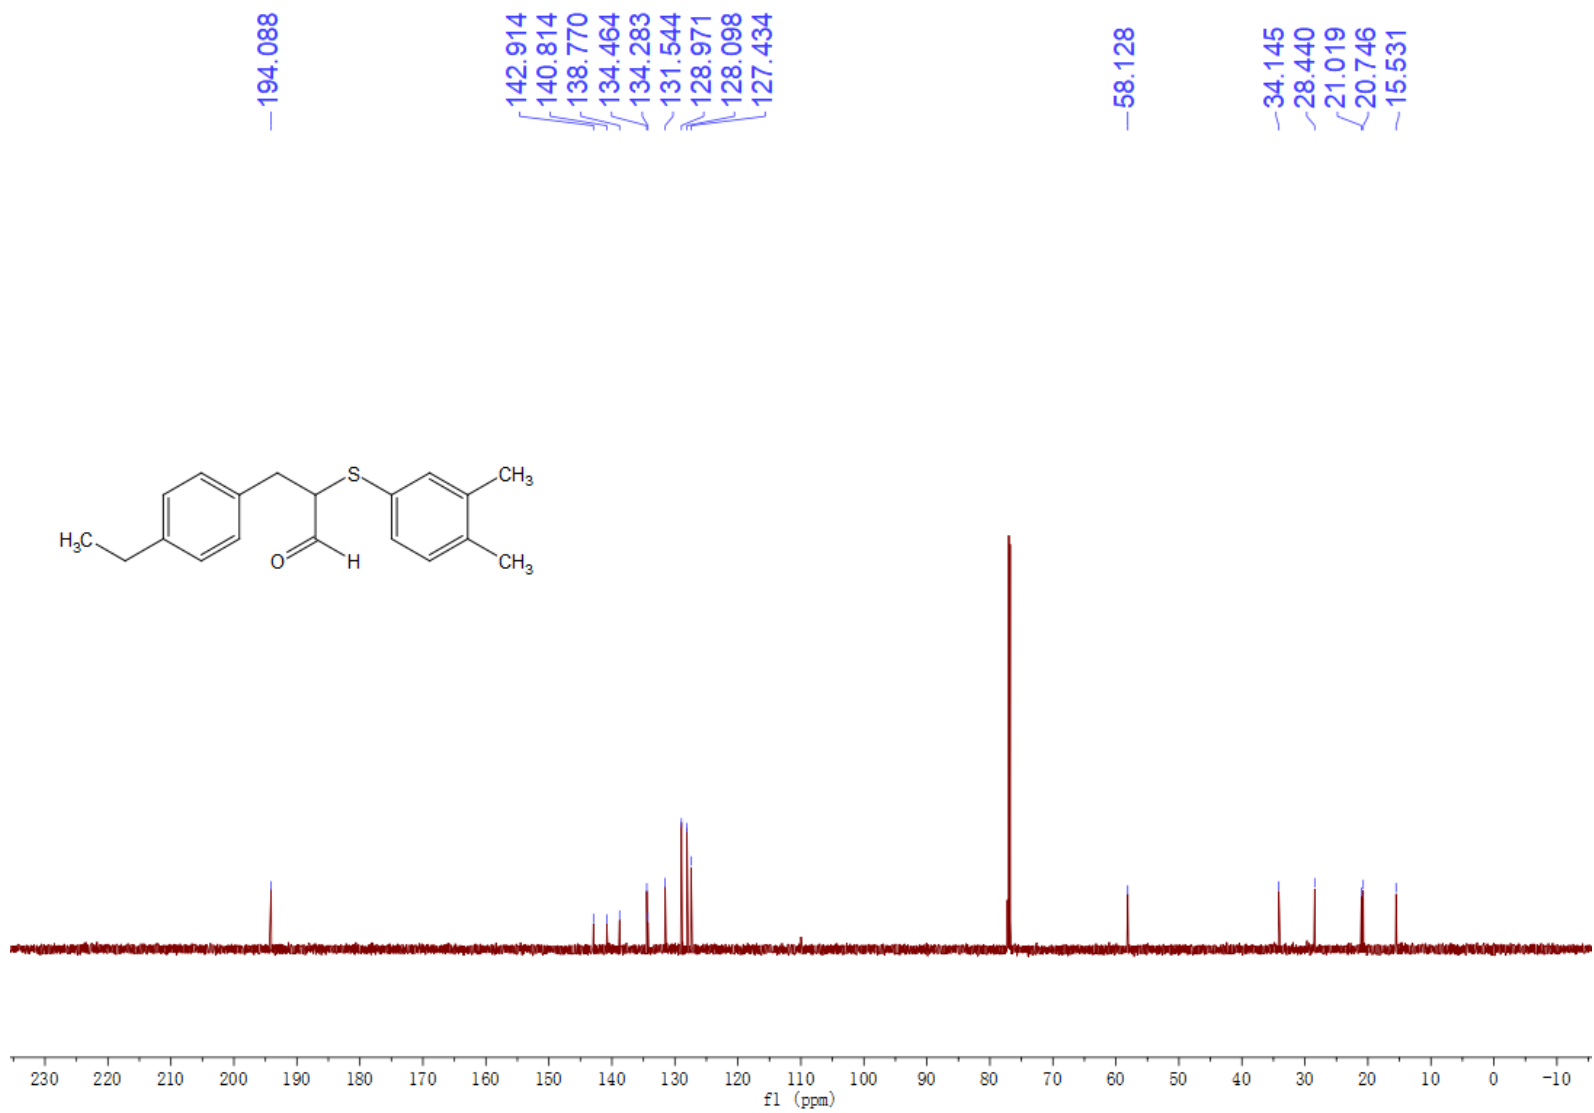

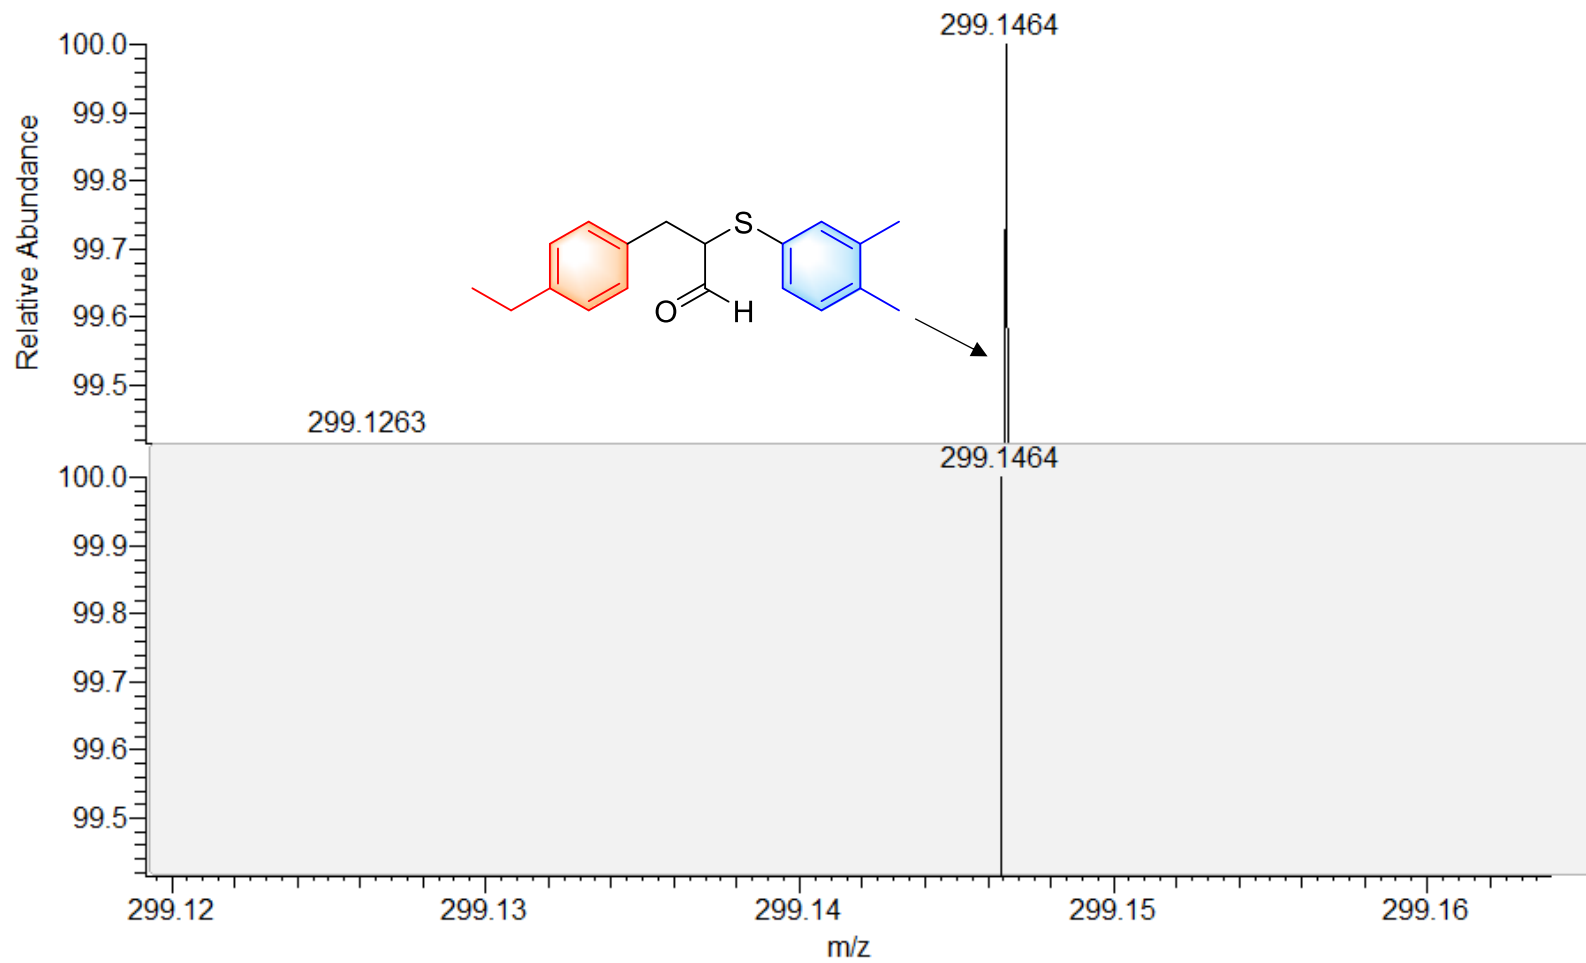

NL:  
1.68E5  
MOUDAN-M24#5  
RT: 0.02 AV: 1 T:  
FTMS + p ESI Full  
lock ms  
[60.0000-900.0000]

NL:  
7.70E5  
C<sub>19</sub> H<sub>22</sub> OS +H:  
C<sub>19</sub> H<sub>23</sub> O<sub>1</sub> S<sub>1</sub>  
pa Chrg 1

**2-((3,4-dimethylphenyl)thio)-3-(4-methoxyphenyl)propanal (3cc)**

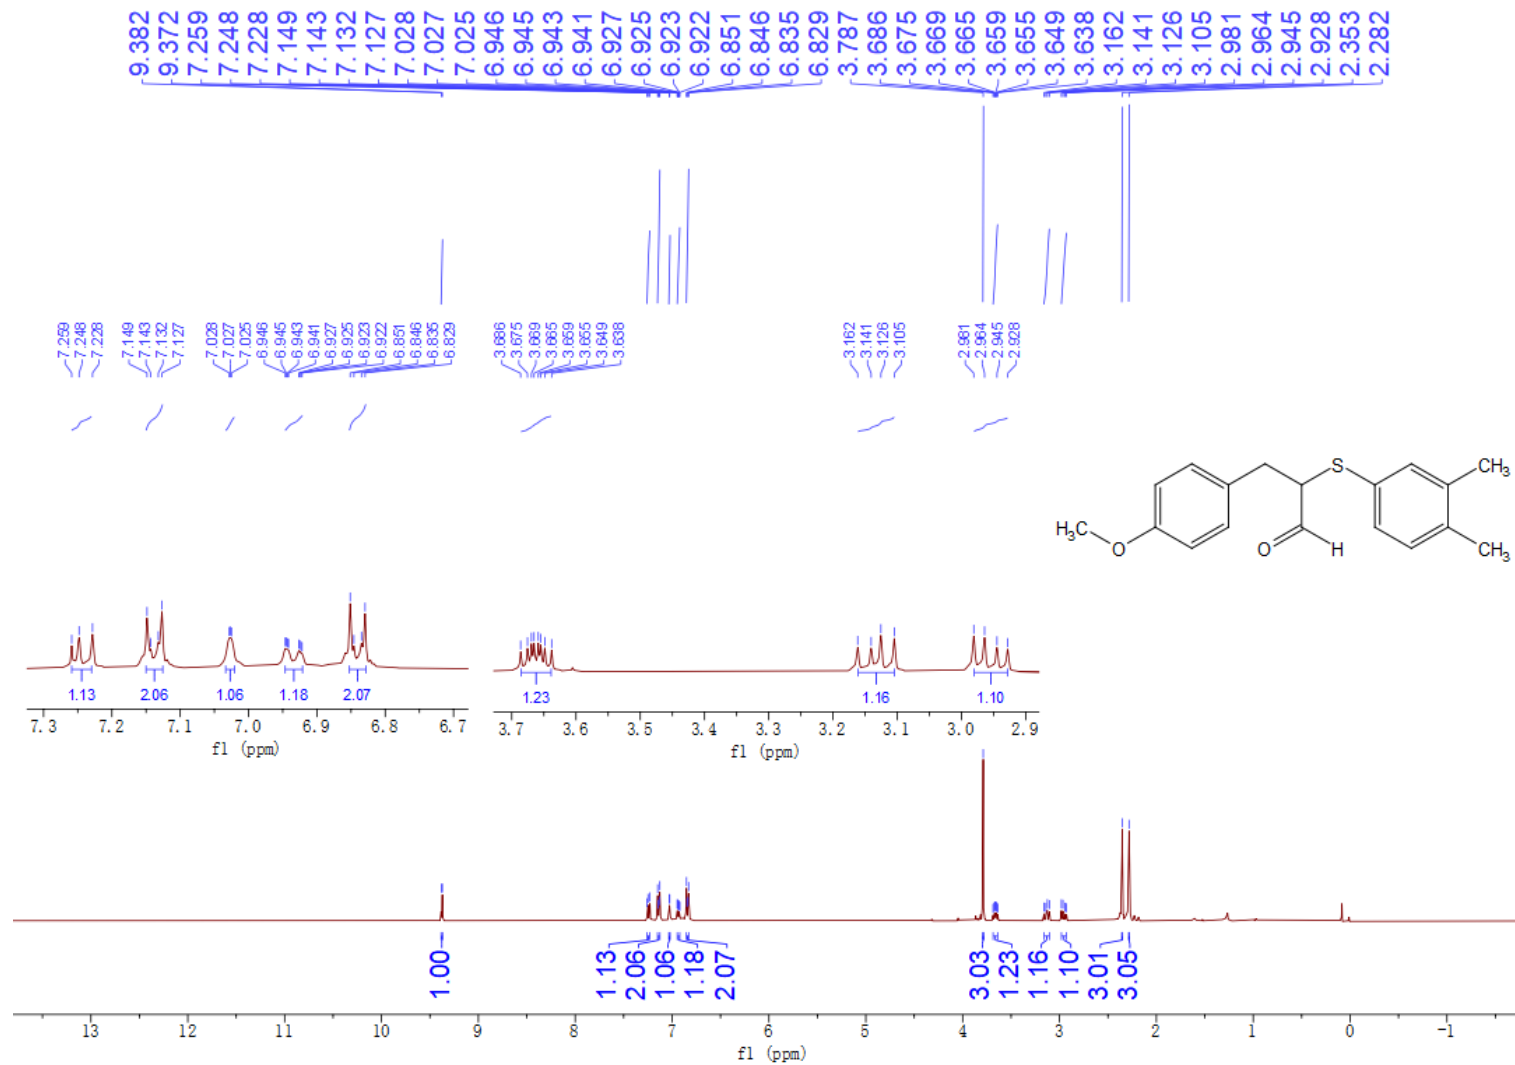

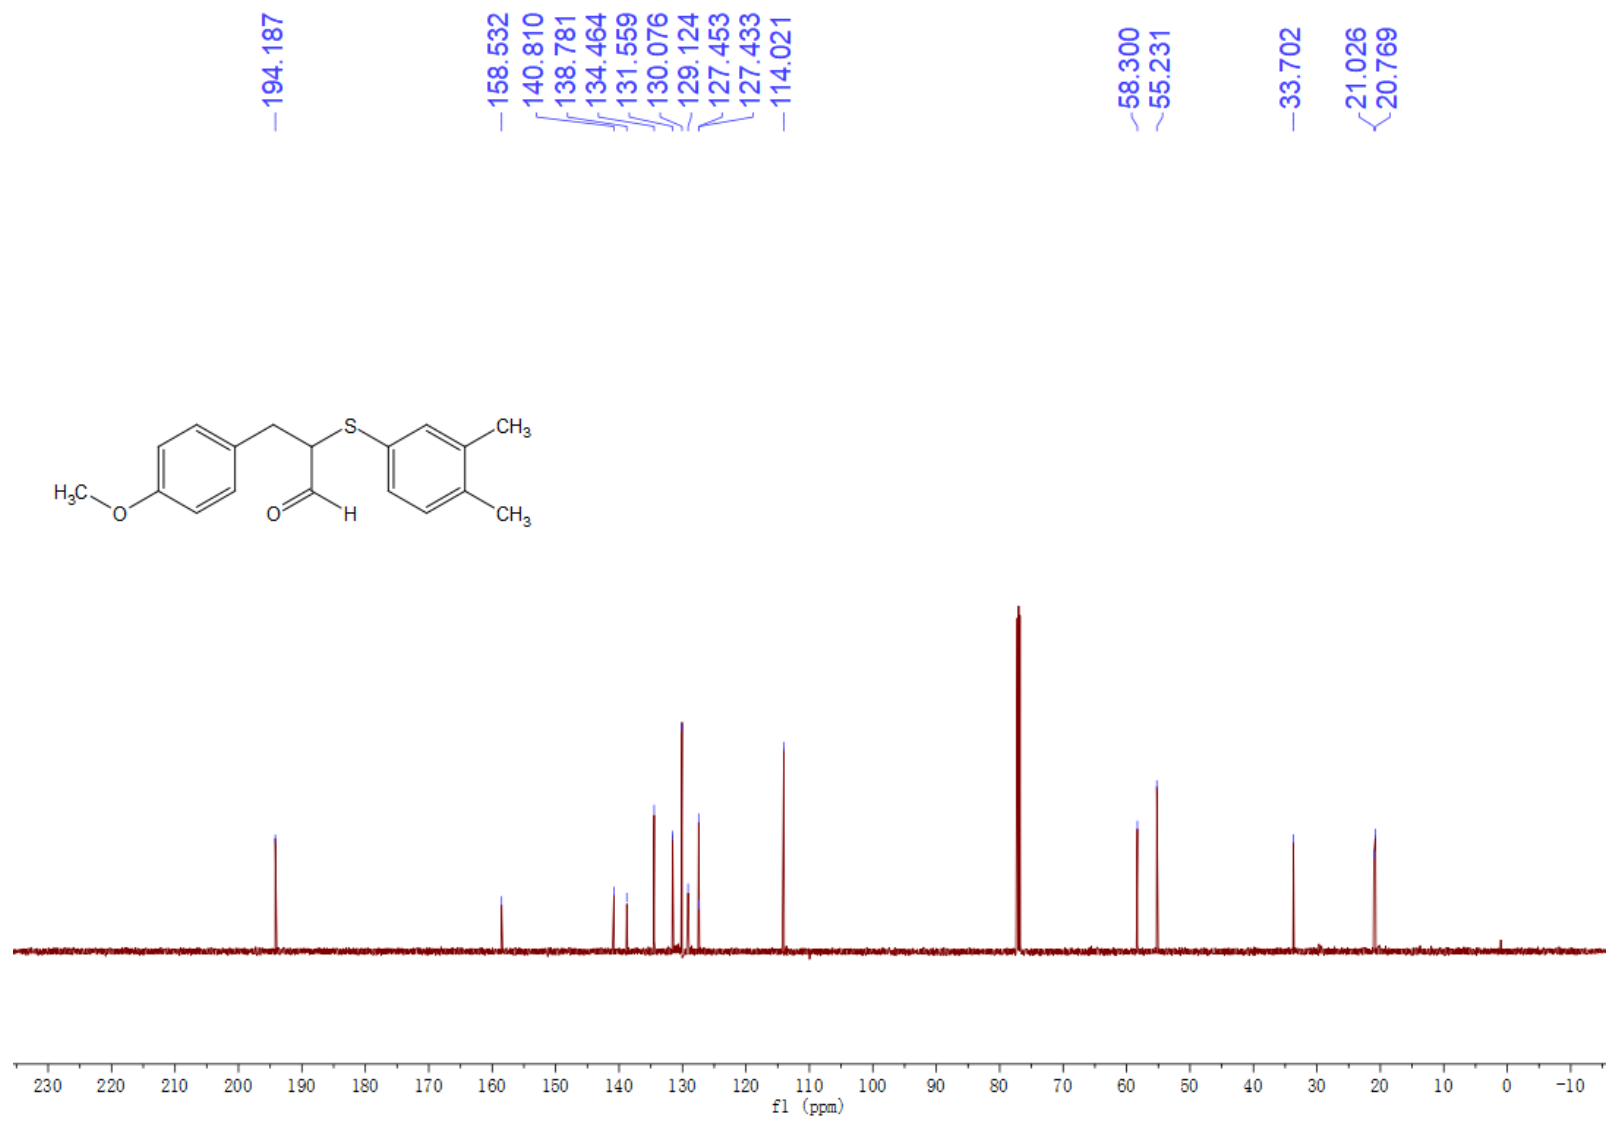

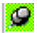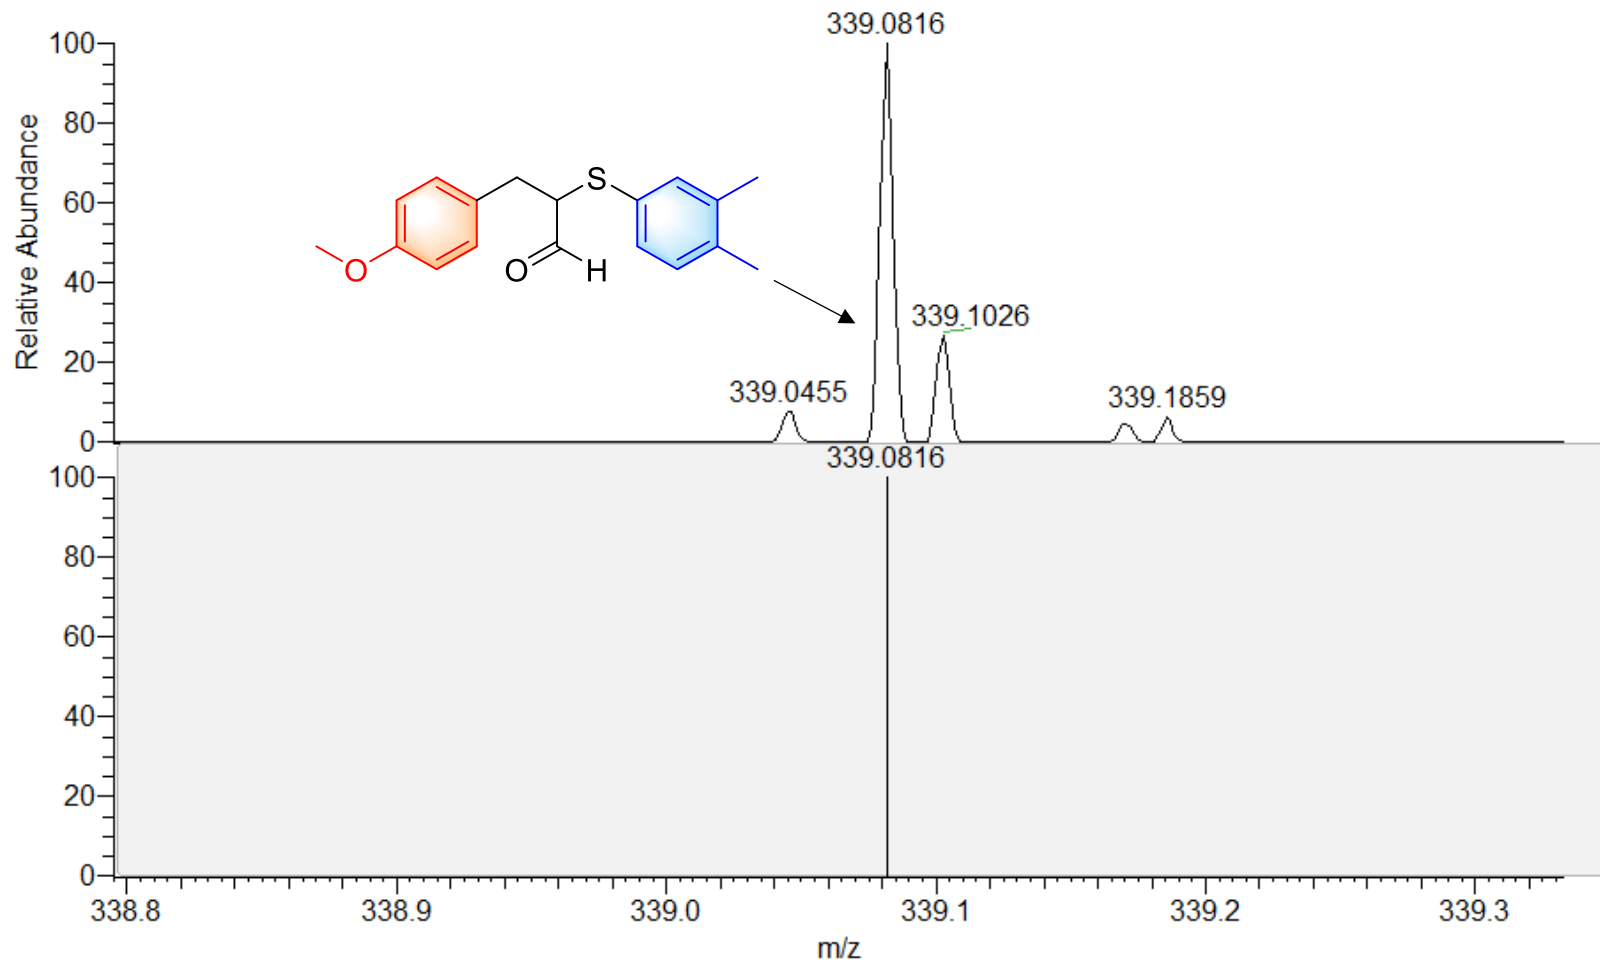

NL:  
3.69E6  
MOUDAN-M24#1  
RT: 0.00 AV: 1 T:  
FTMS + p ESI Full  
lock ms  
[60.0000-900.0000]

NL:  
7.24E5  
C<sub>18</sub> H<sub>20</sub> O<sub>2</sub> S +K:  
C<sub>18</sub> H<sub>20</sub> O<sub>2</sub> S<sub>1</sub> K<sub>1</sub>  
pa Chrg 1



**2-((3-chlorophenyl)thio)-3-(4-ethylphenyl)propanal (3cd)**

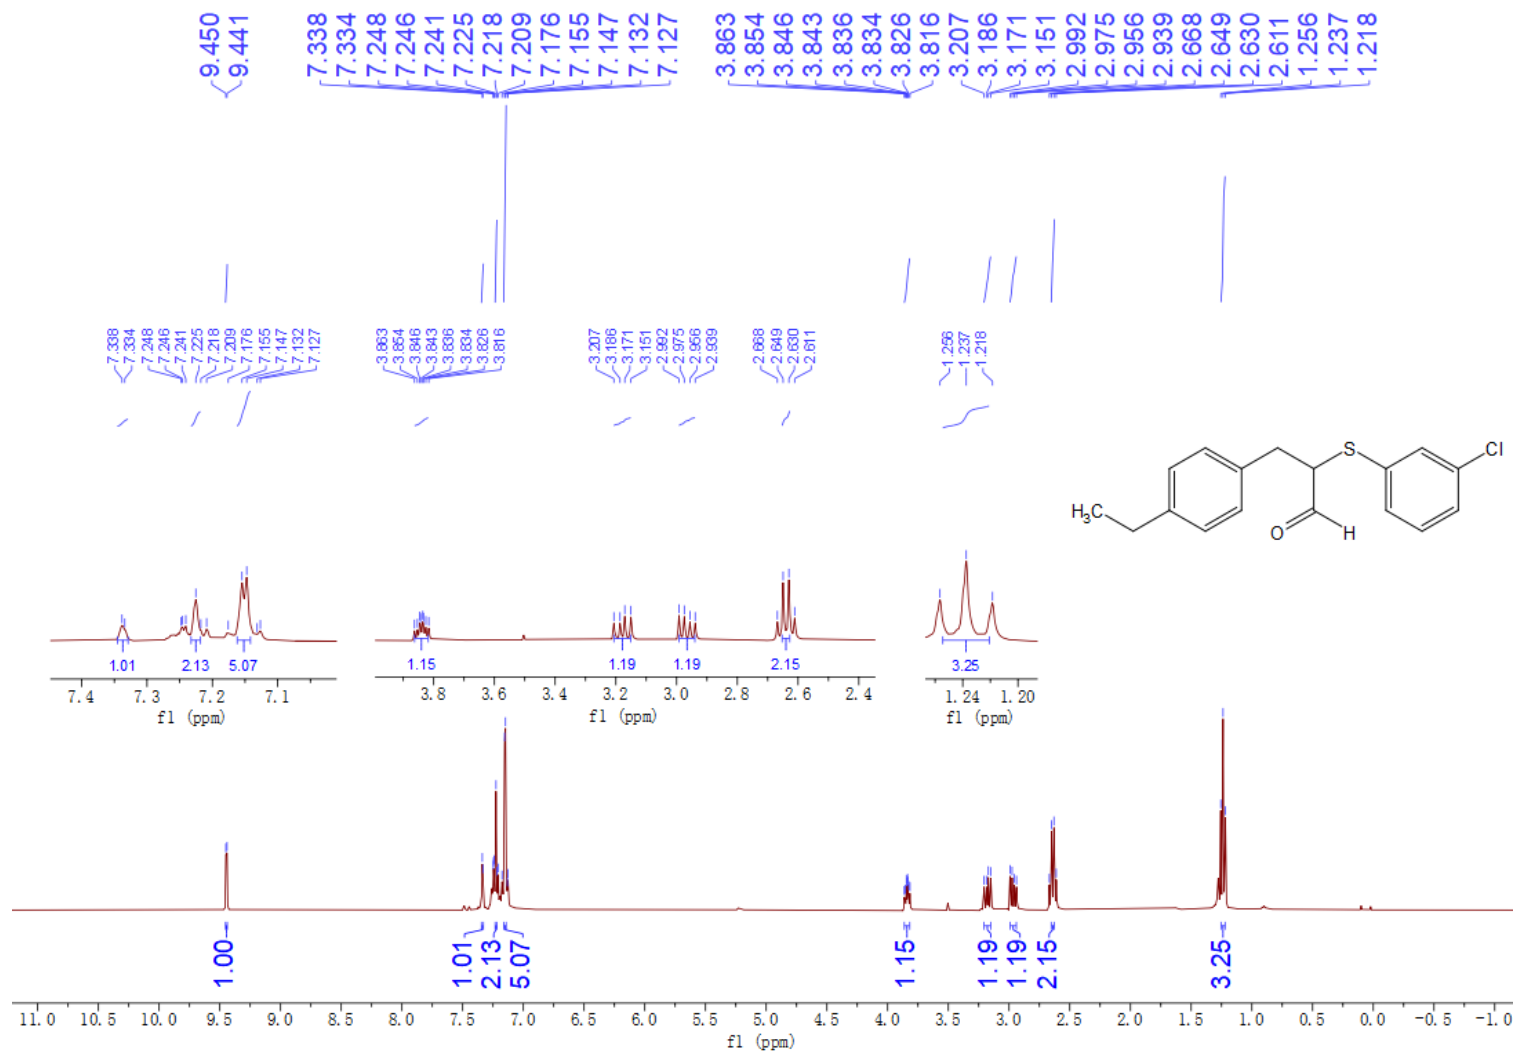

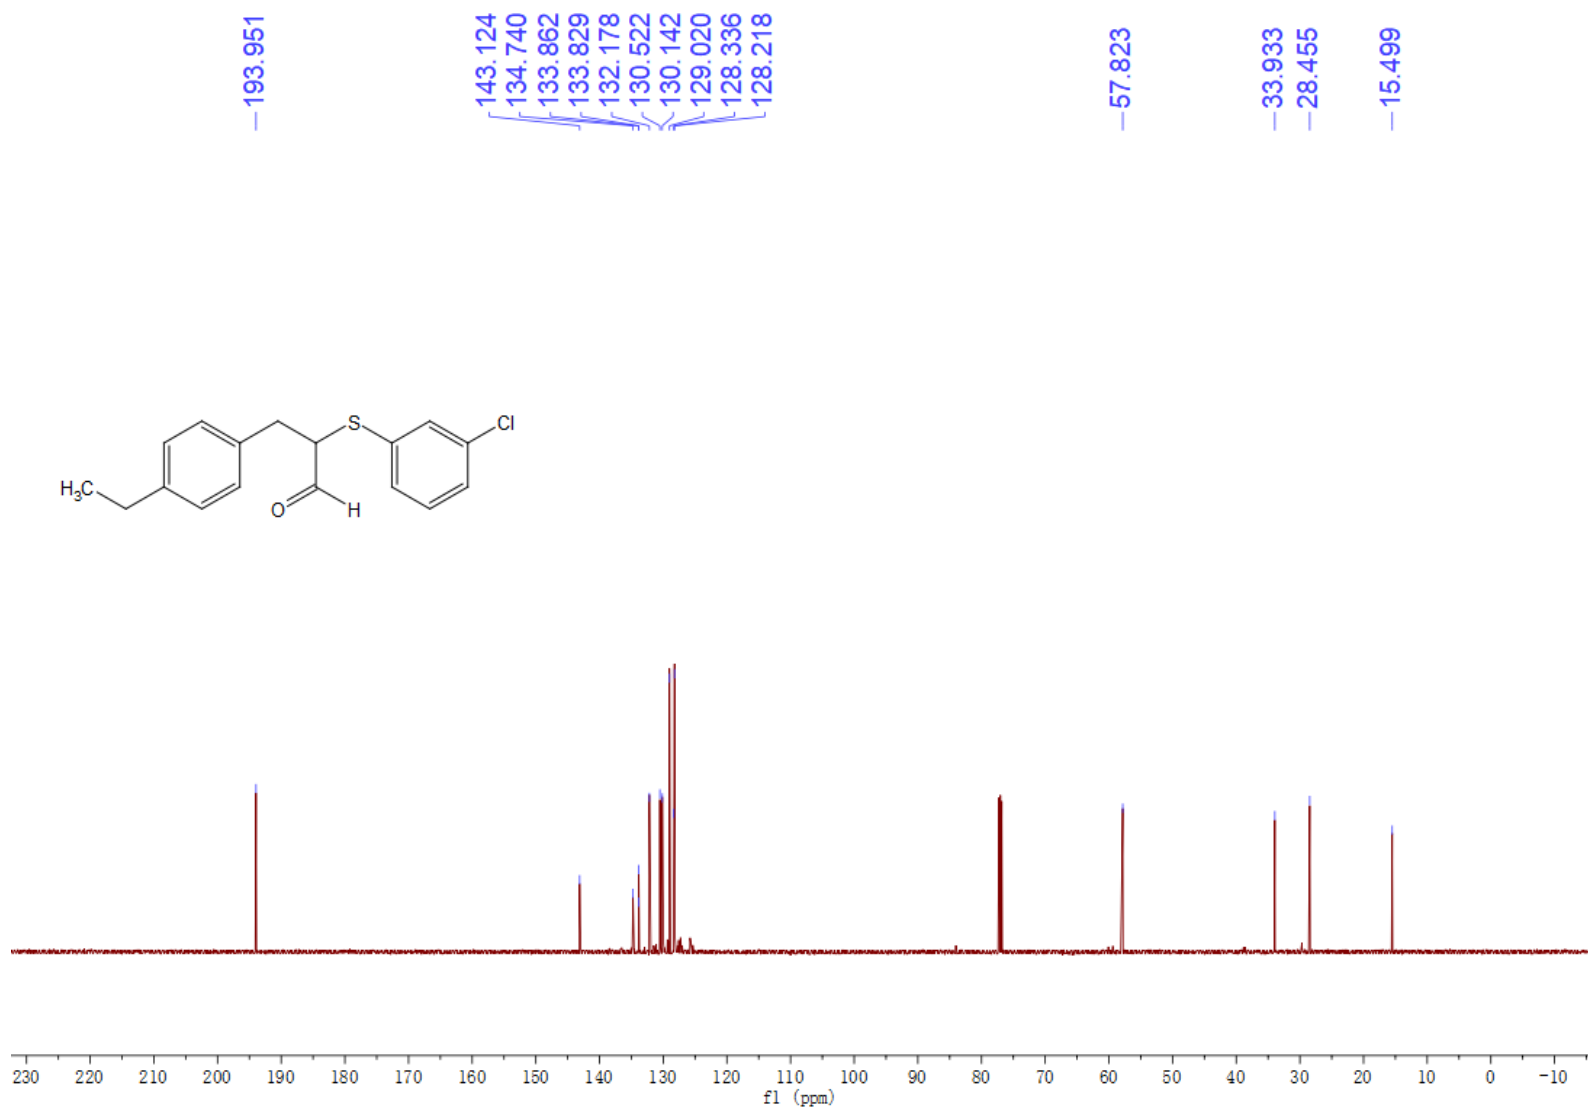

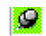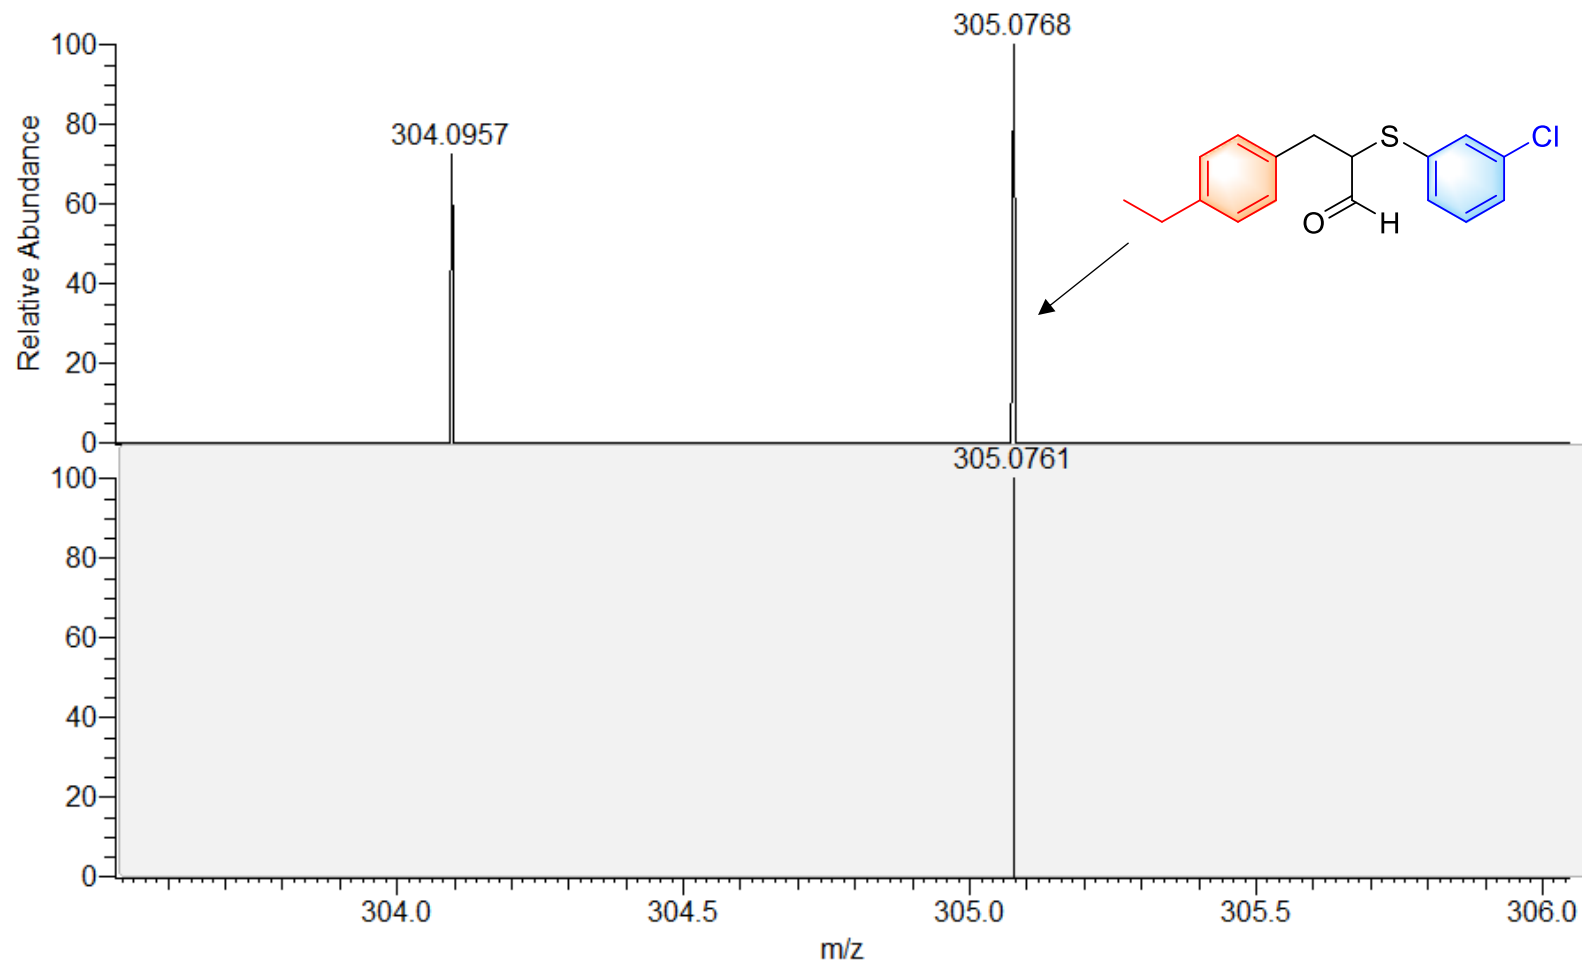

NL:  
1.51E5  
MOUDAN-M22#1  
RT: 0.00 AV: 1 T:  
FTMS + p ESI Full  
ms  
[60.0000-900.0000]

NL:  
5.96E5  
C<sub>17</sub> H<sub>17</sub> ClOS +H:  
C<sub>17</sub> H<sub>18</sub> Cl<sub>1</sub> O<sub>1</sub> S<sub>1</sub>  
pa Chrg 1

**3-(4-(*tert*-butyl)phenyl)-2-((4-fluorophenyl)thio)propanal (3ce)**

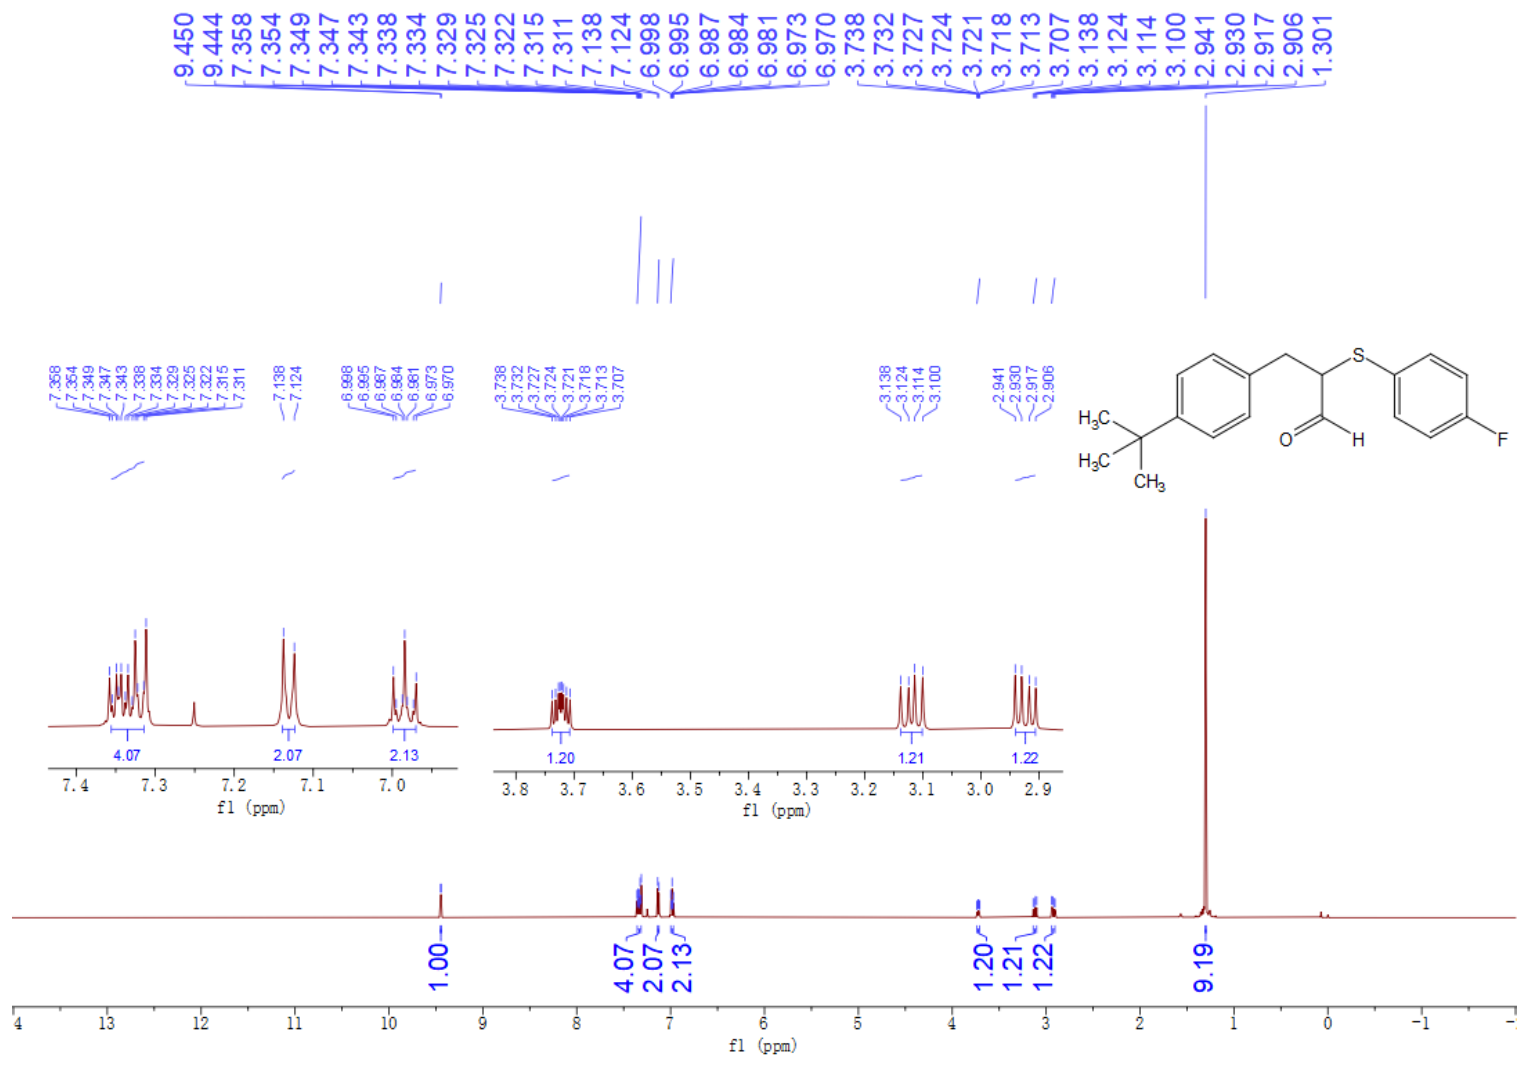

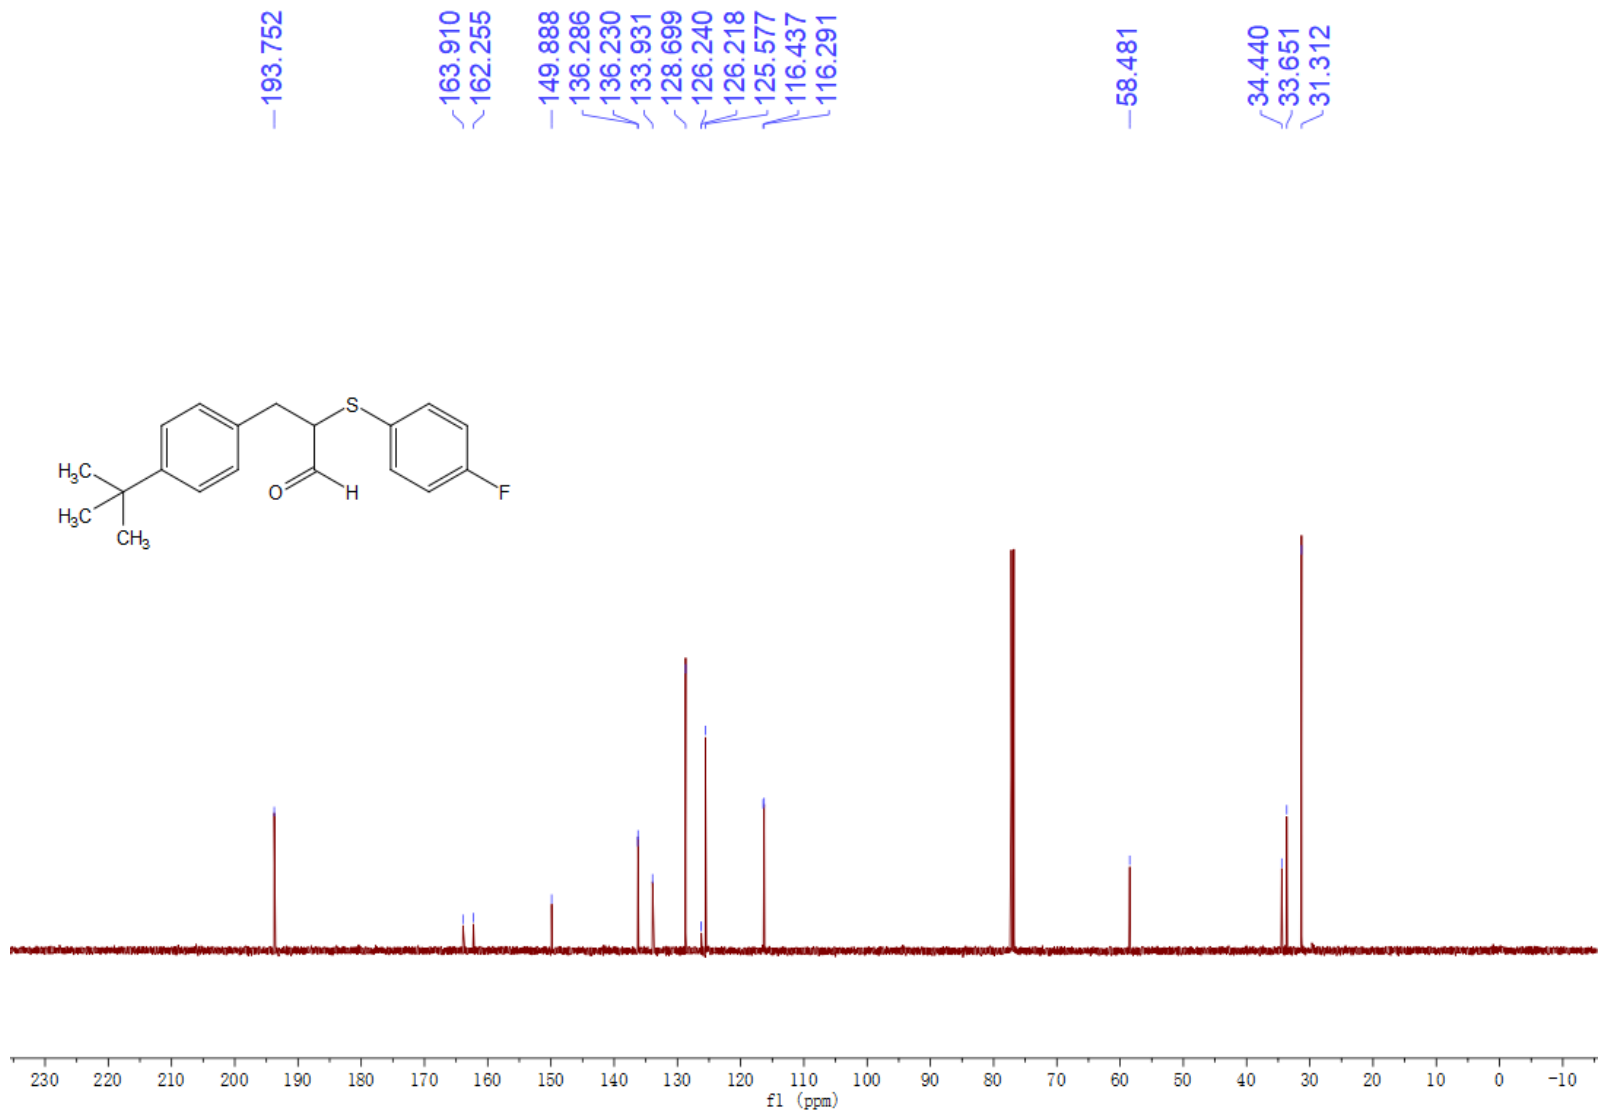

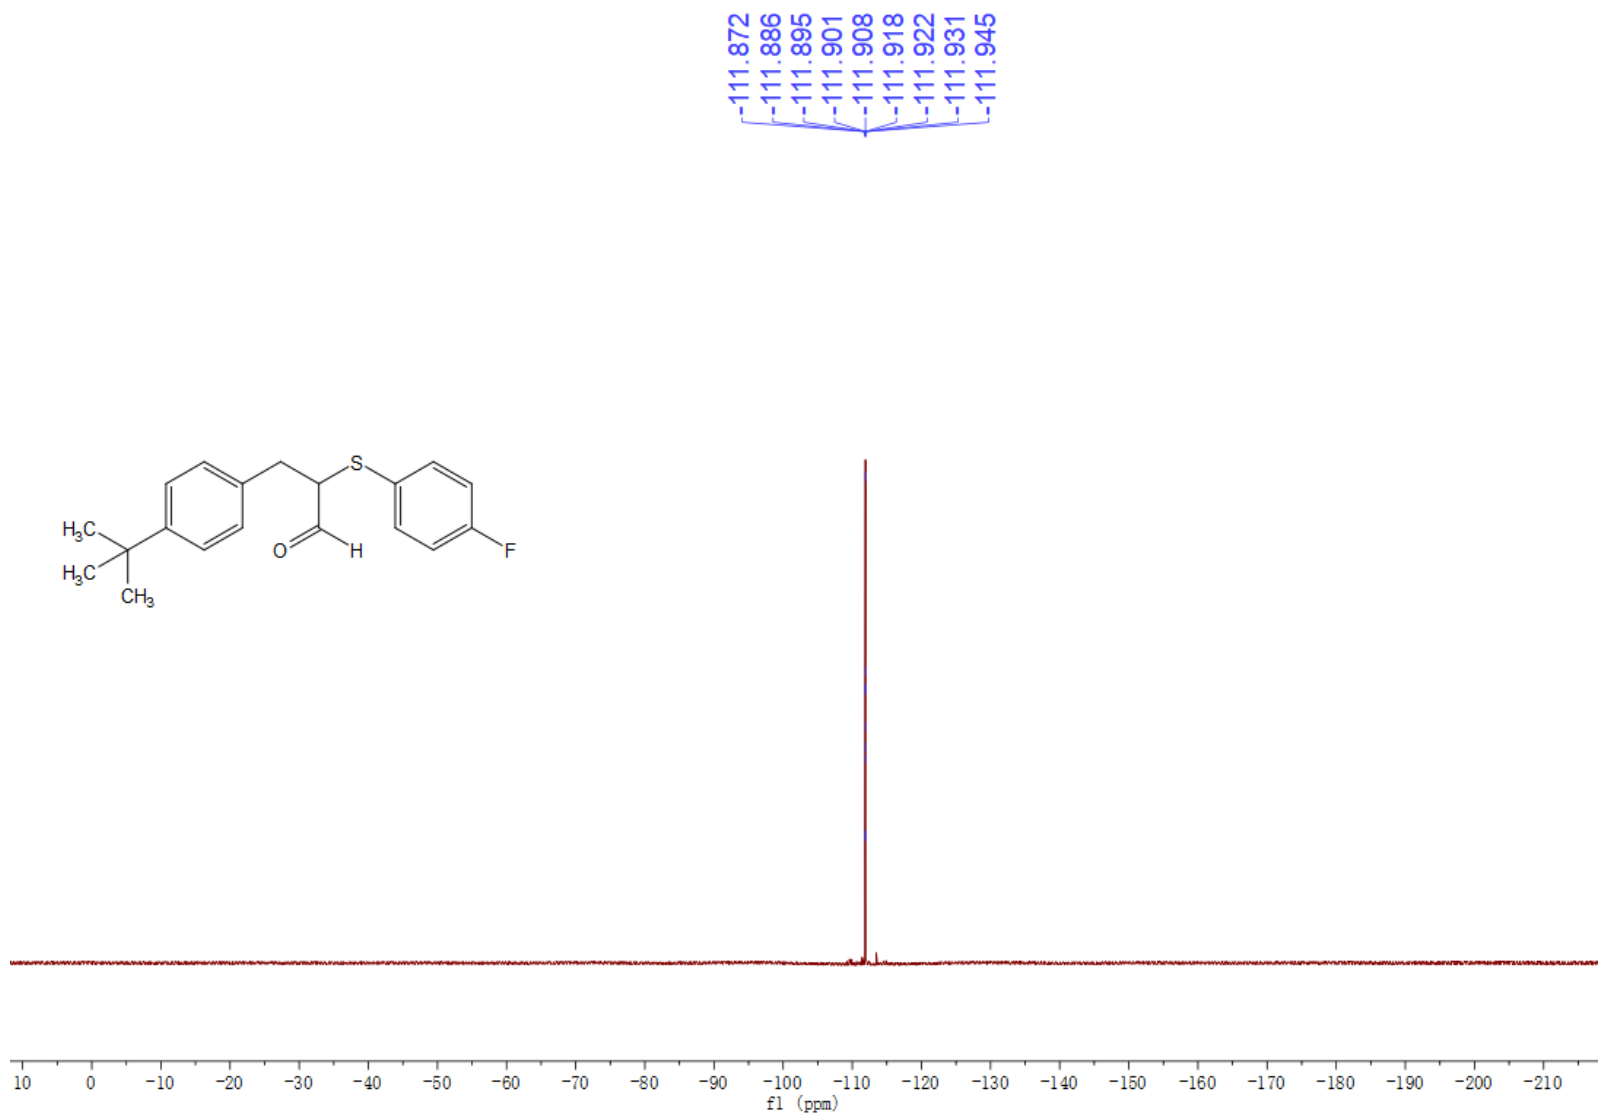

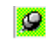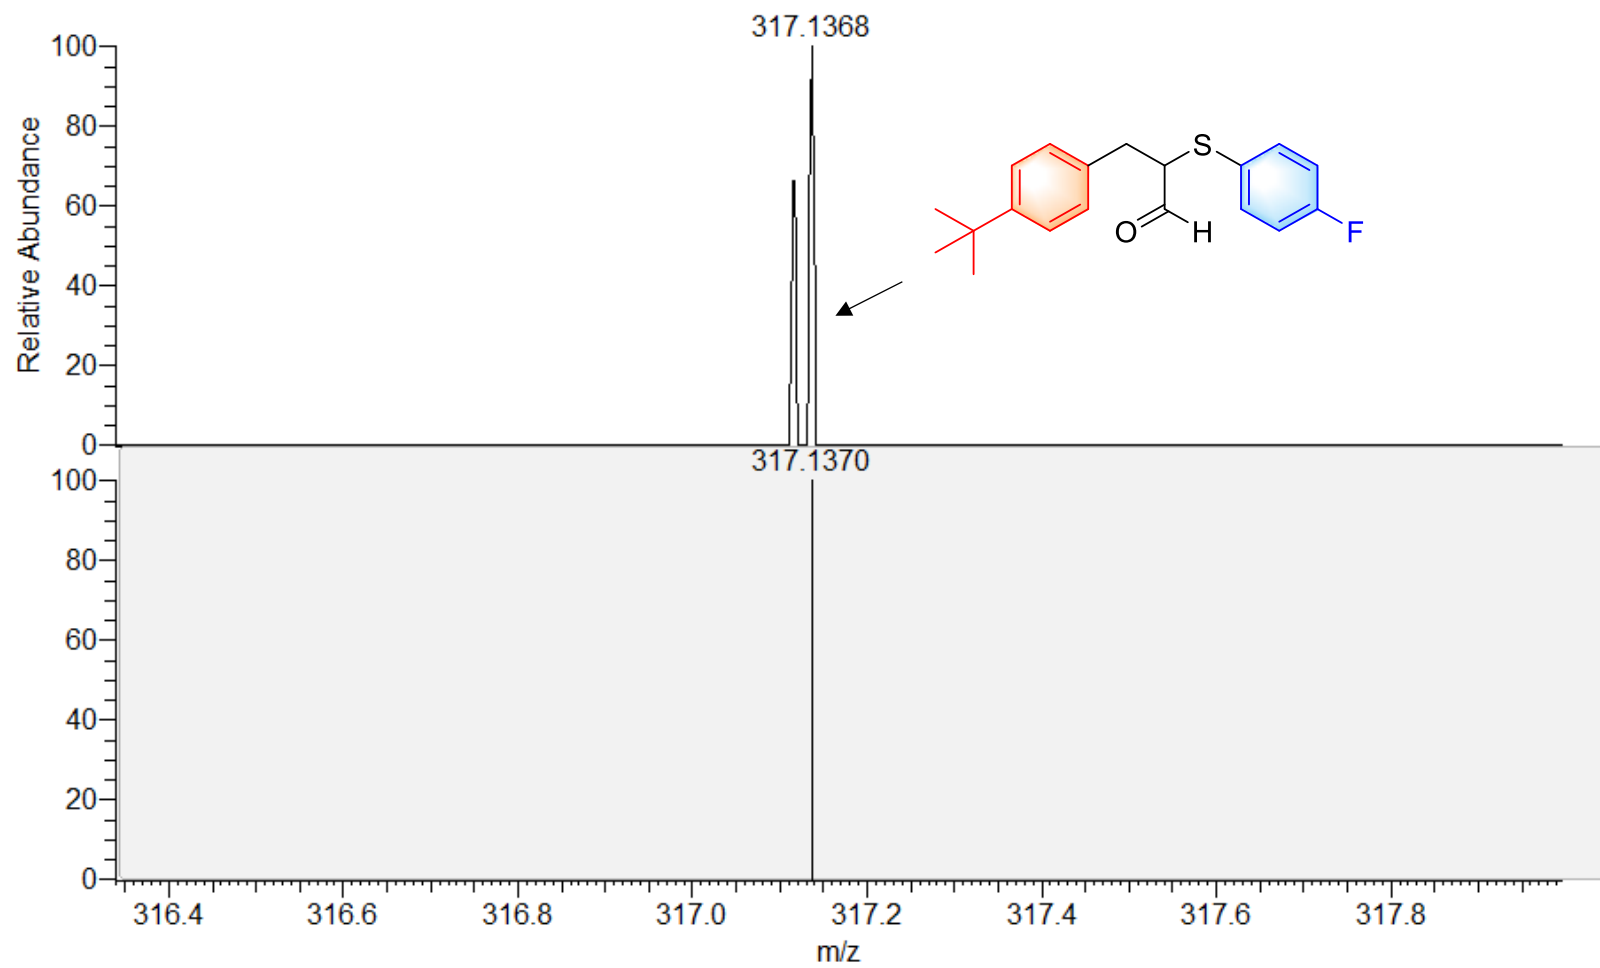

NL:  
1.45E5  
MOUDAN-M19#38  
RT: 0.17 AV: 1 T:  
FTMS + p ESI Full  
lock ms  
[100.0000-  
900.0000]

NL:  
7.70E5  
C<sub>19</sub> H<sub>21</sub> FOS +H:  
C<sub>19</sub> H<sub>22</sub> F<sub>1</sub> O<sub>1</sub> S<sub>1</sub>  
pa Chrg 1

**3-(4-chlorophenyl)-2-((4-methoxyphenyl)thio)propanal (3cf)**

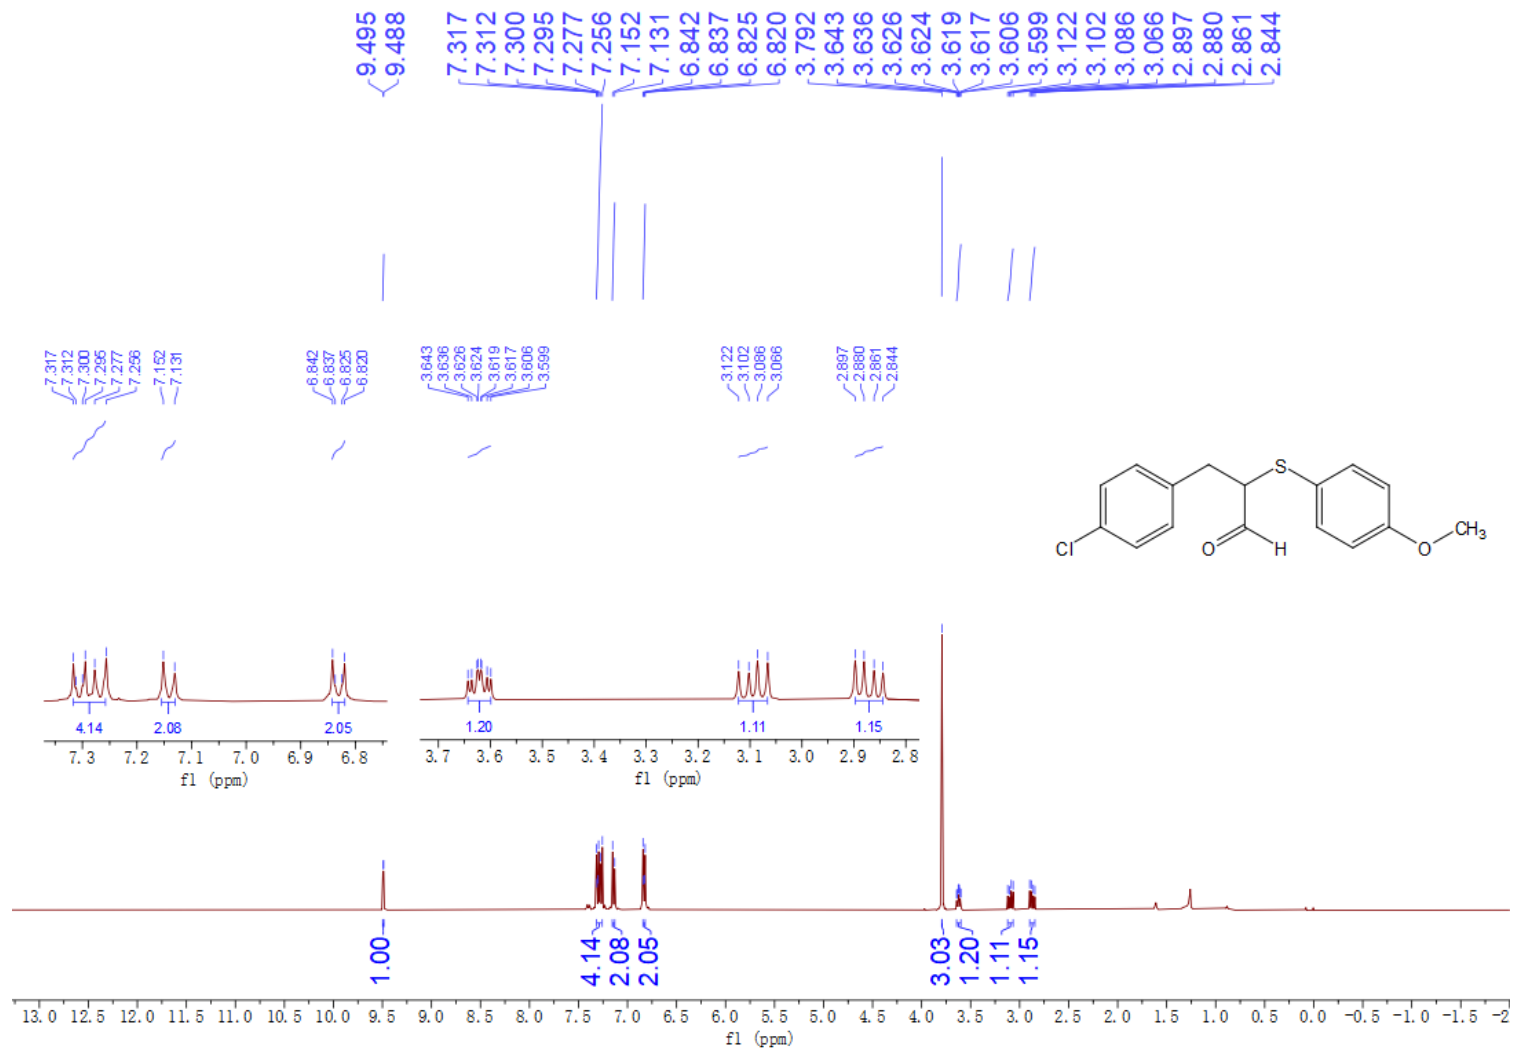



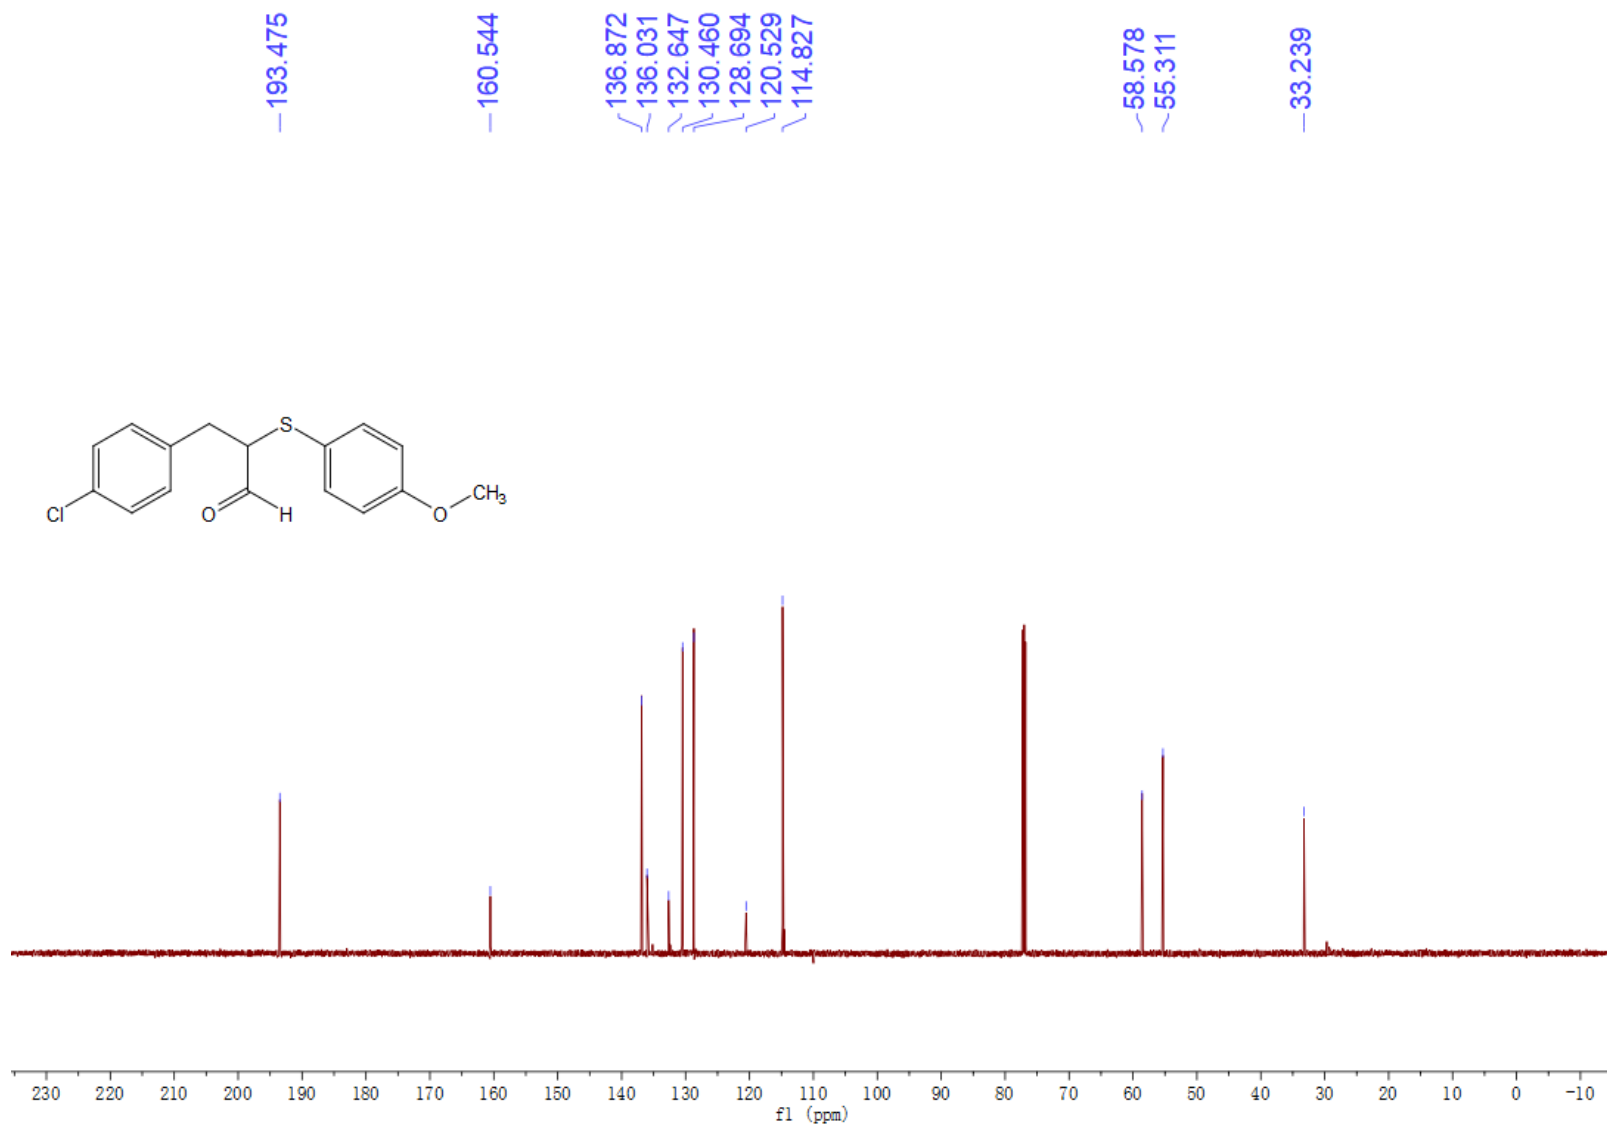

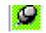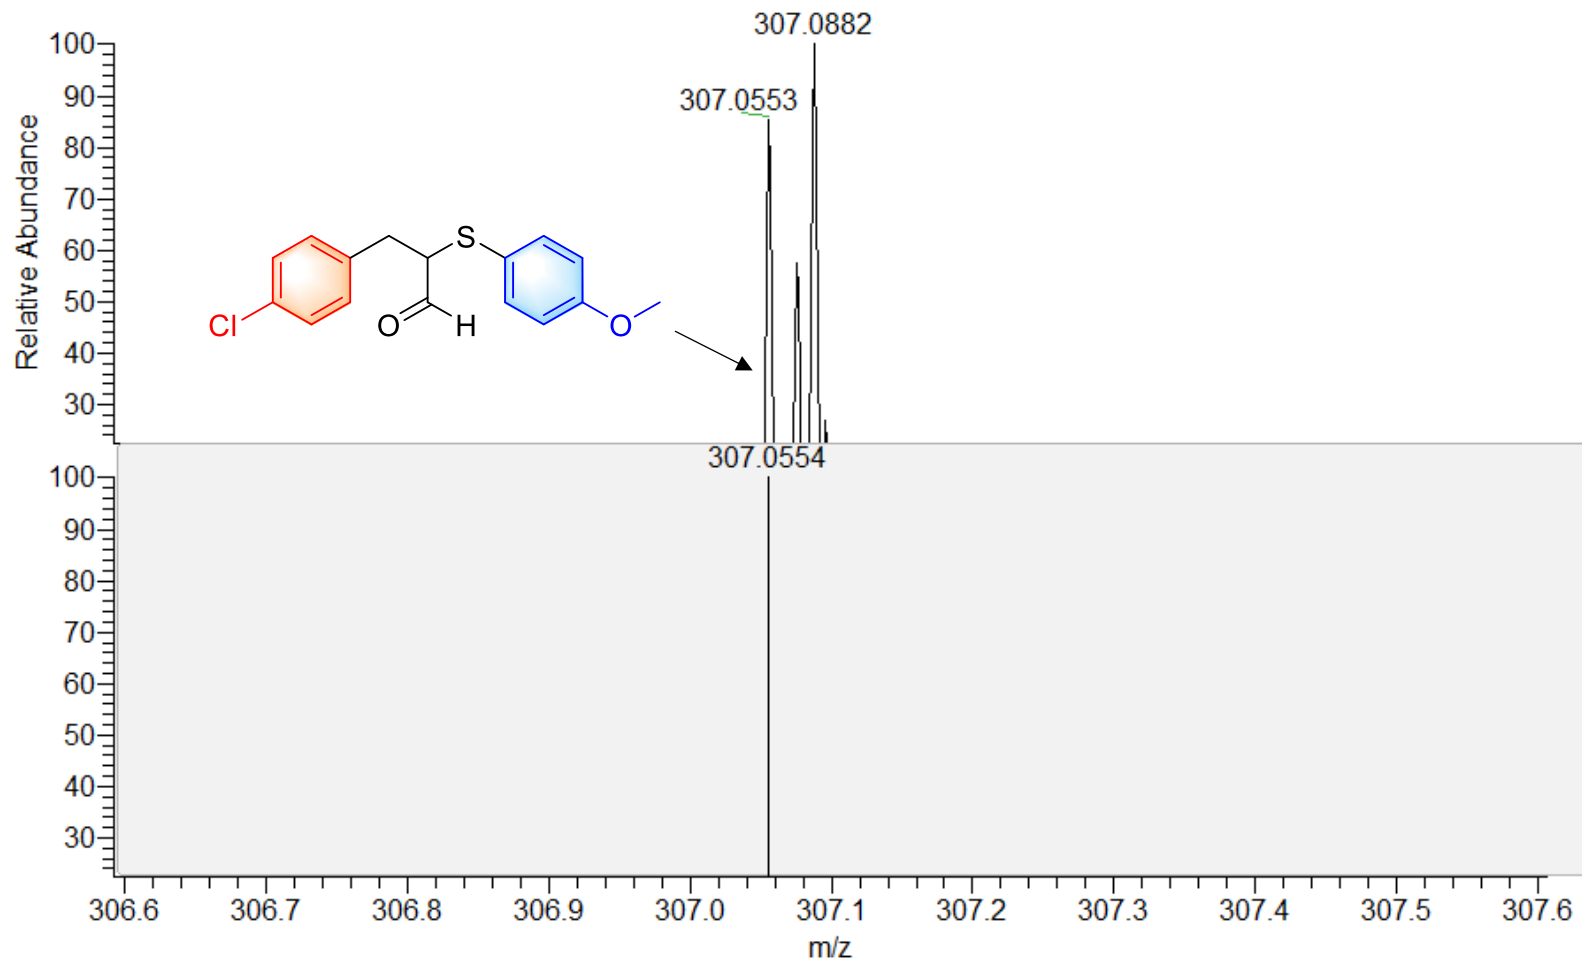

NL:  
2.08E6  
DZHY-MOUDAN-  
M7#58 RT: 0.26 AV:  
1 T: FTMS + p ESI  
Full lock ms  
[60.0000-750.0000]

NL:  
6.02E5  
C<sub>16</sub> H<sub>15</sub> ClO<sub>2</sub> S +H:  
C<sub>16</sub> H<sub>16</sub> Cl<sub>1</sub> O<sub>2</sub> S<sub>1</sub>  
pa Chrg 1

**3-(4-bromophenyl)-2-(*m*-tolylthio)propanal (3cg)**

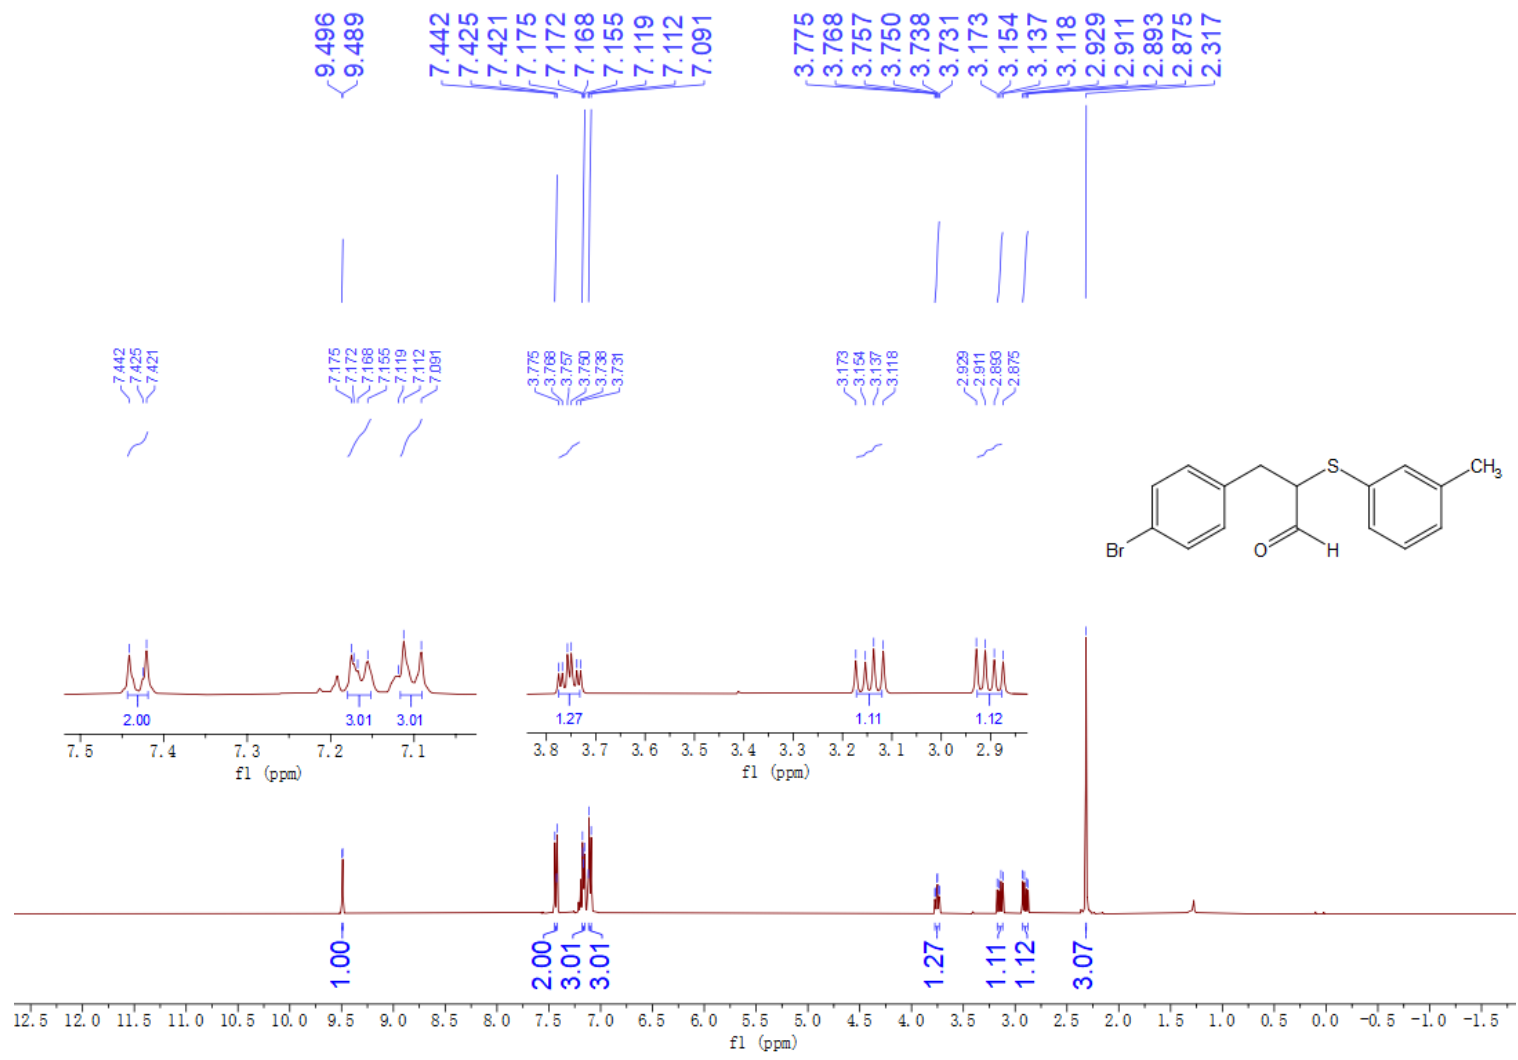

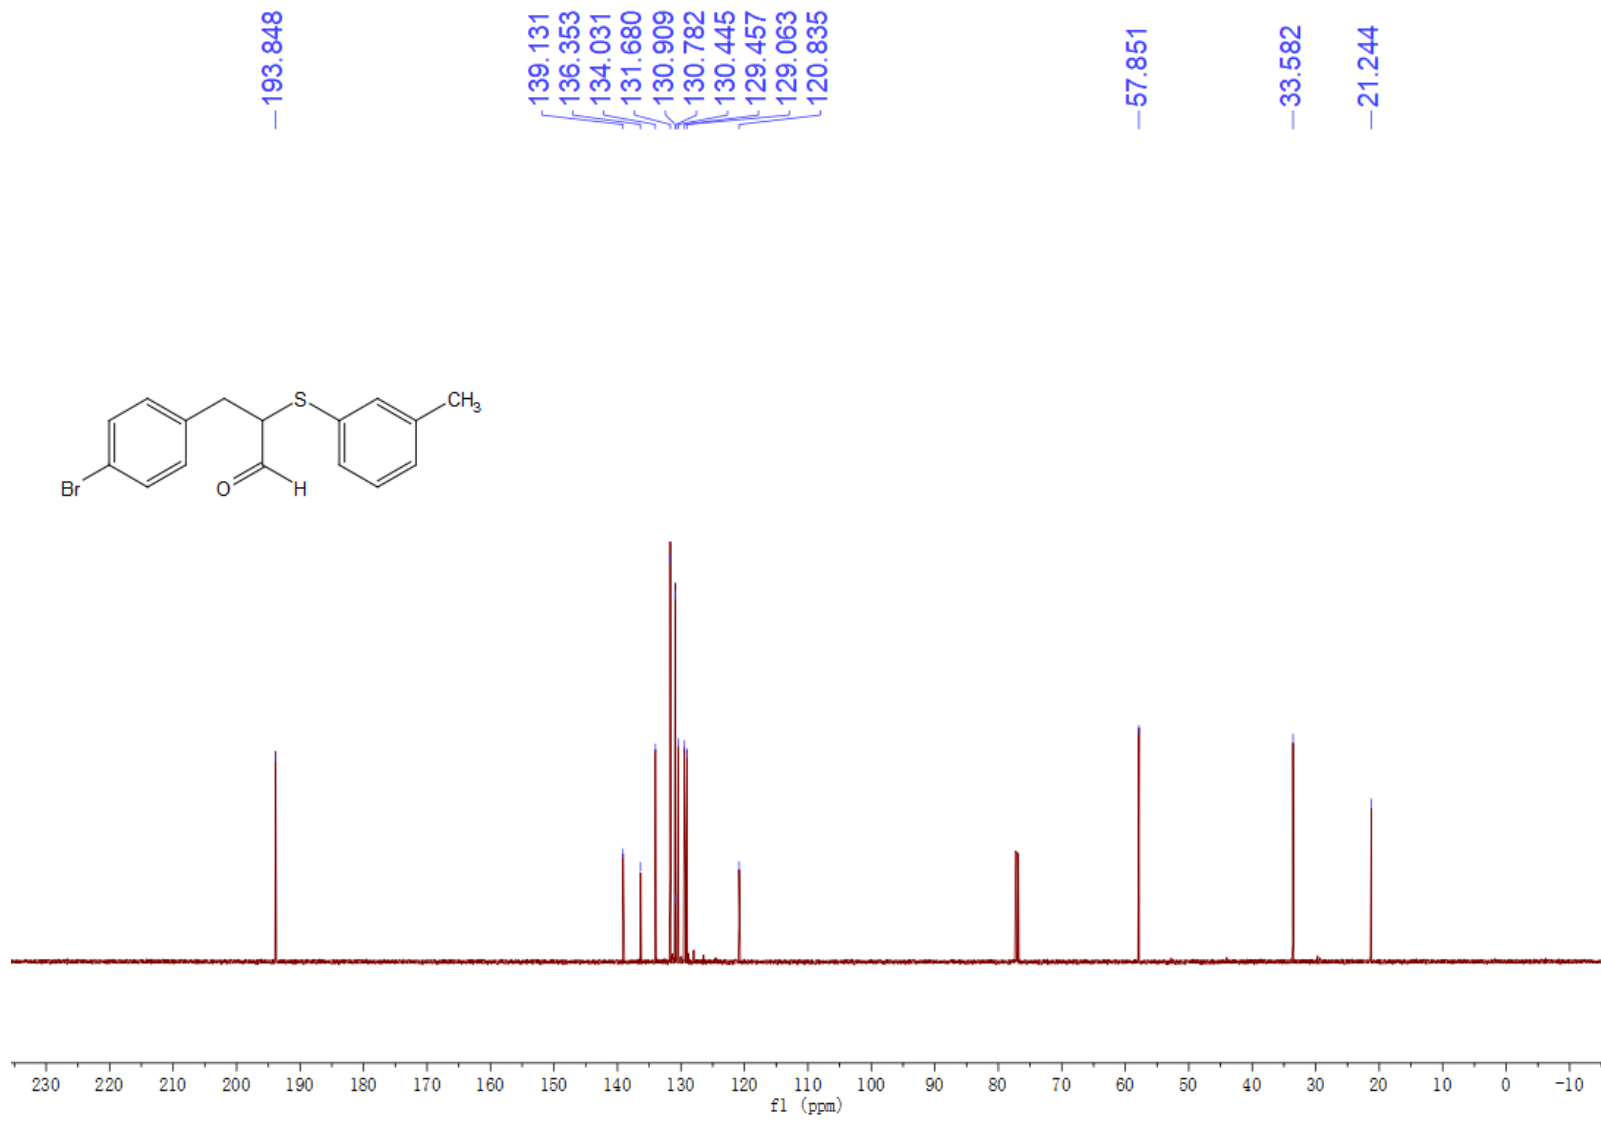

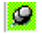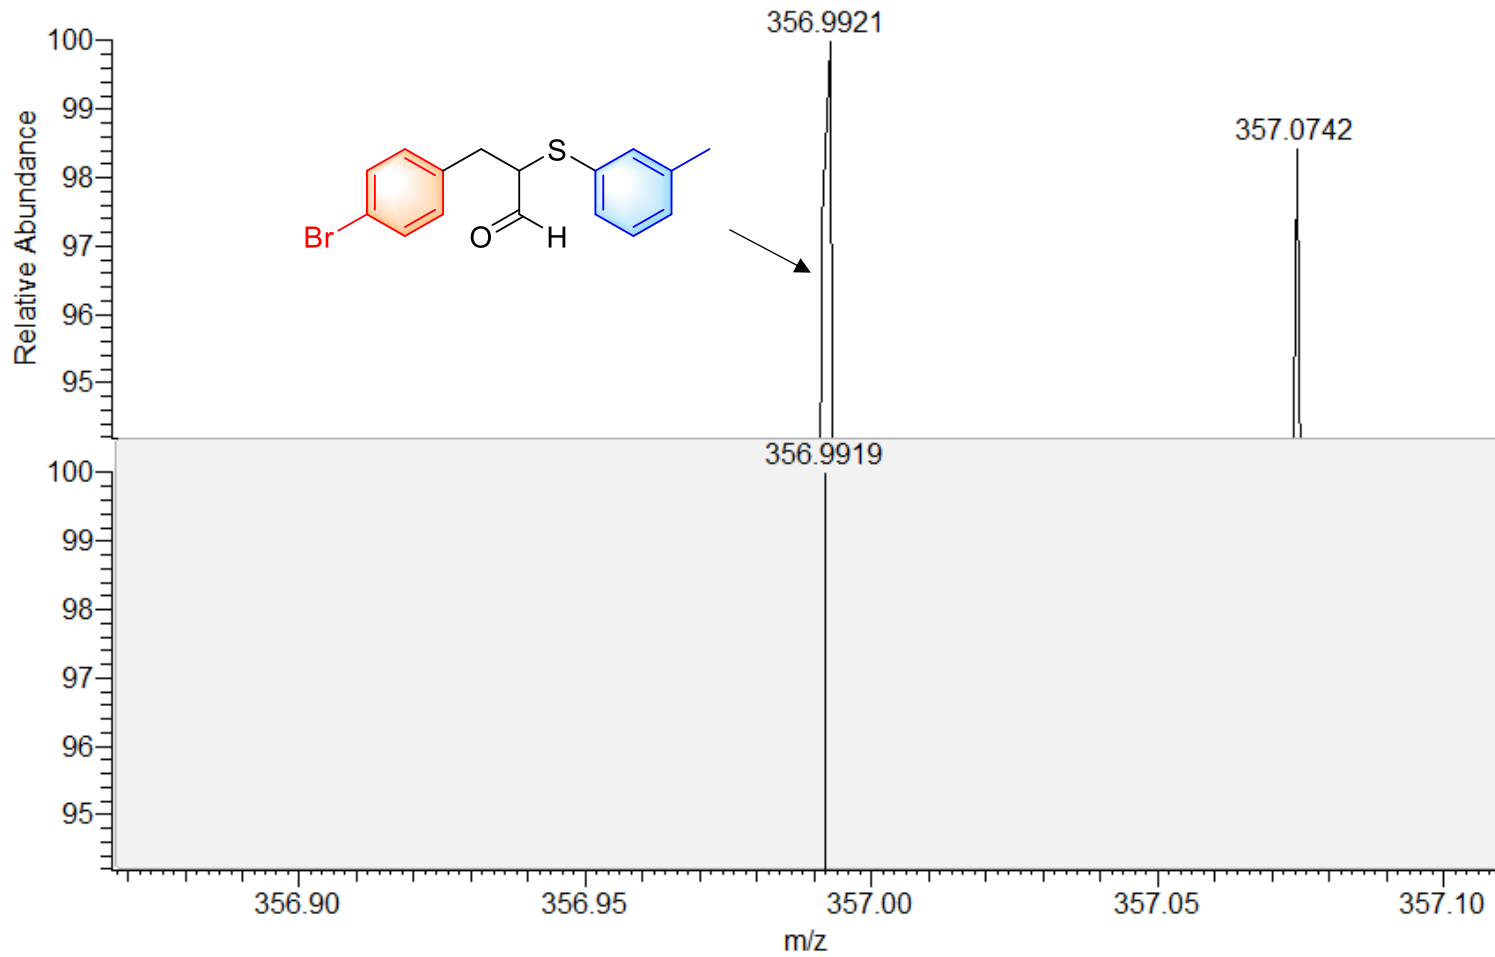

NL:  
1.16E5  
MOUDAN-M24#97 RT:  
0.43 AV: 1 T: FTMS + p  
ESI Full lock ms  
[60.0000-900.0000]

NL:  
4.03E5  
C<sub>16</sub> H<sub>15</sub> BrOS +Na:  
C<sub>16</sub> H<sub>15</sub> Br<sub>1</sub> O<sub>1</sub> S<sub>1</sub> Na<sub>1</sub>  
pa Chrg 1

2-((4-methoxyphenyl)thio)-3-(4-(trifluoromethyl)phenyl)propanal (3ch)

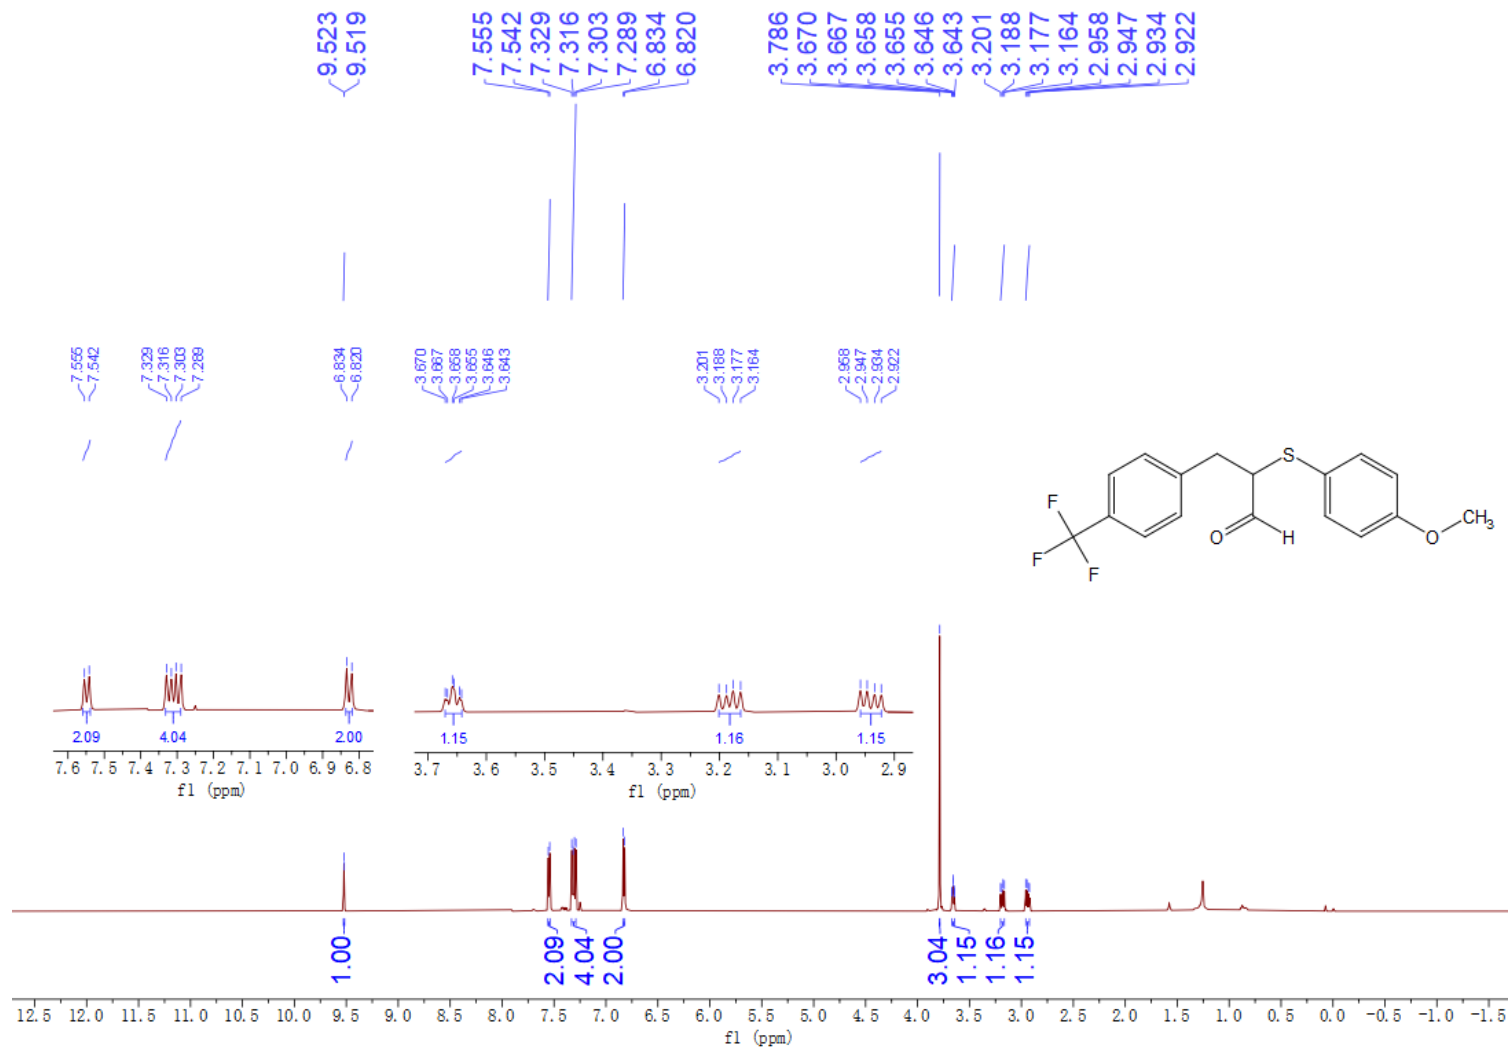

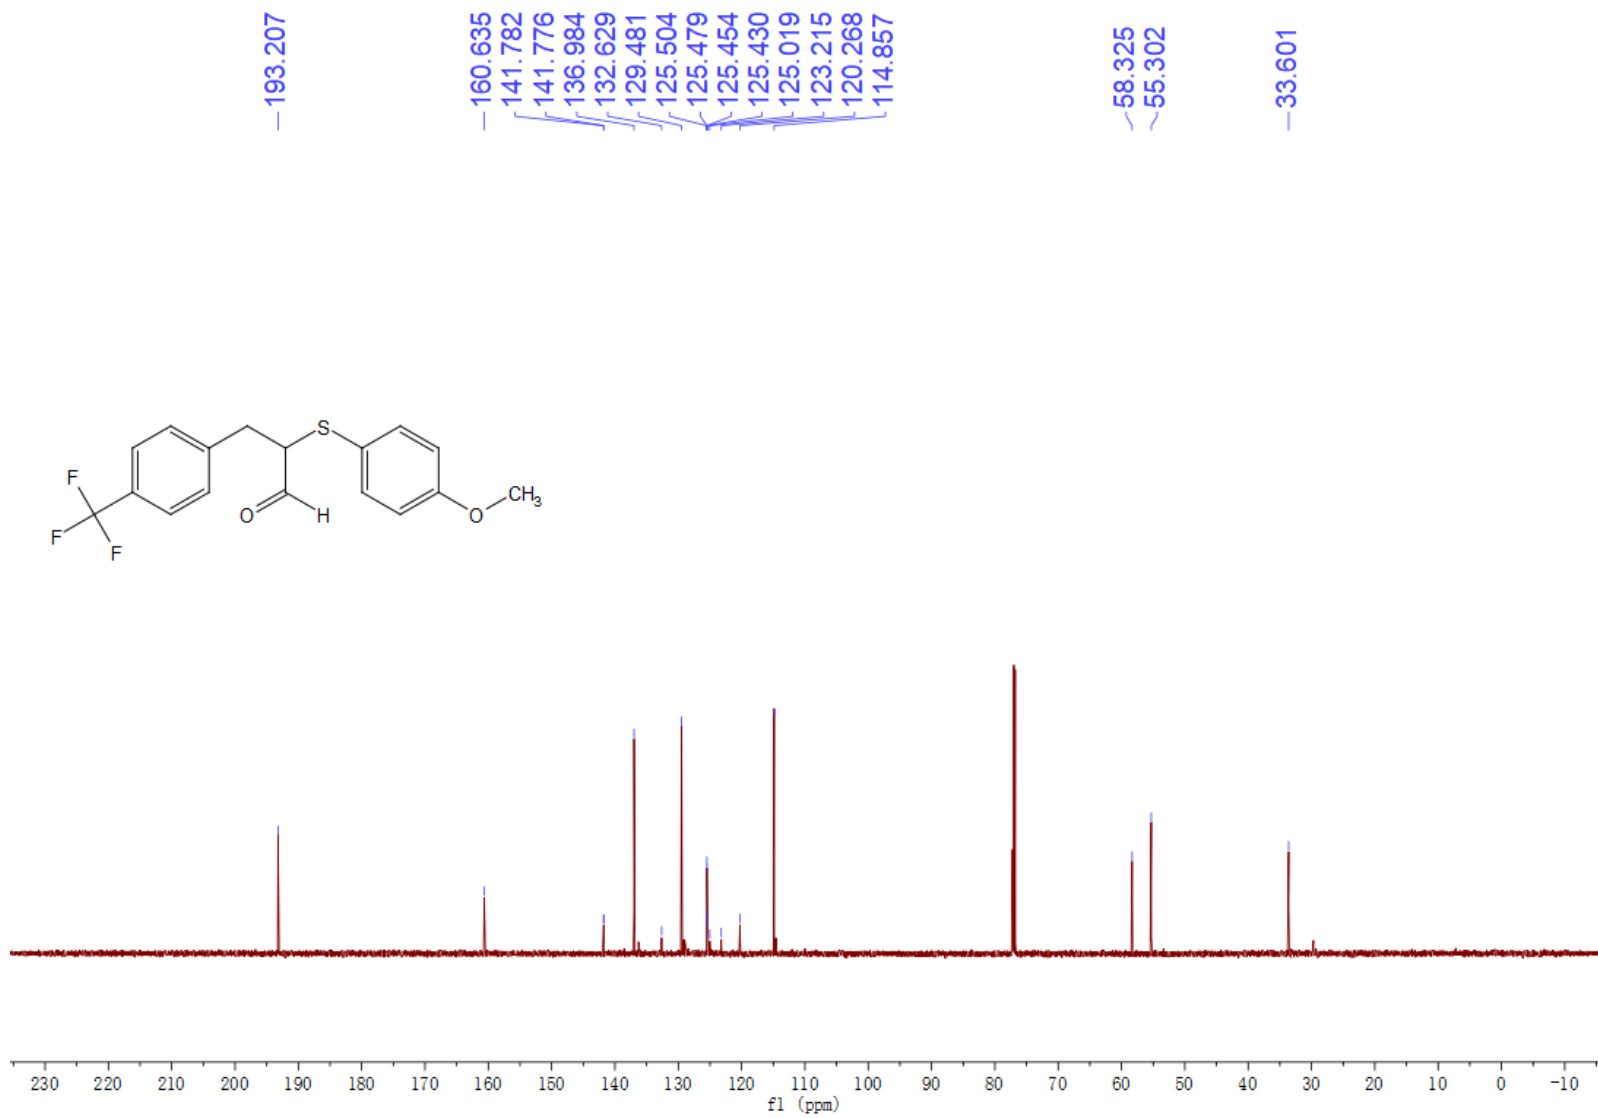

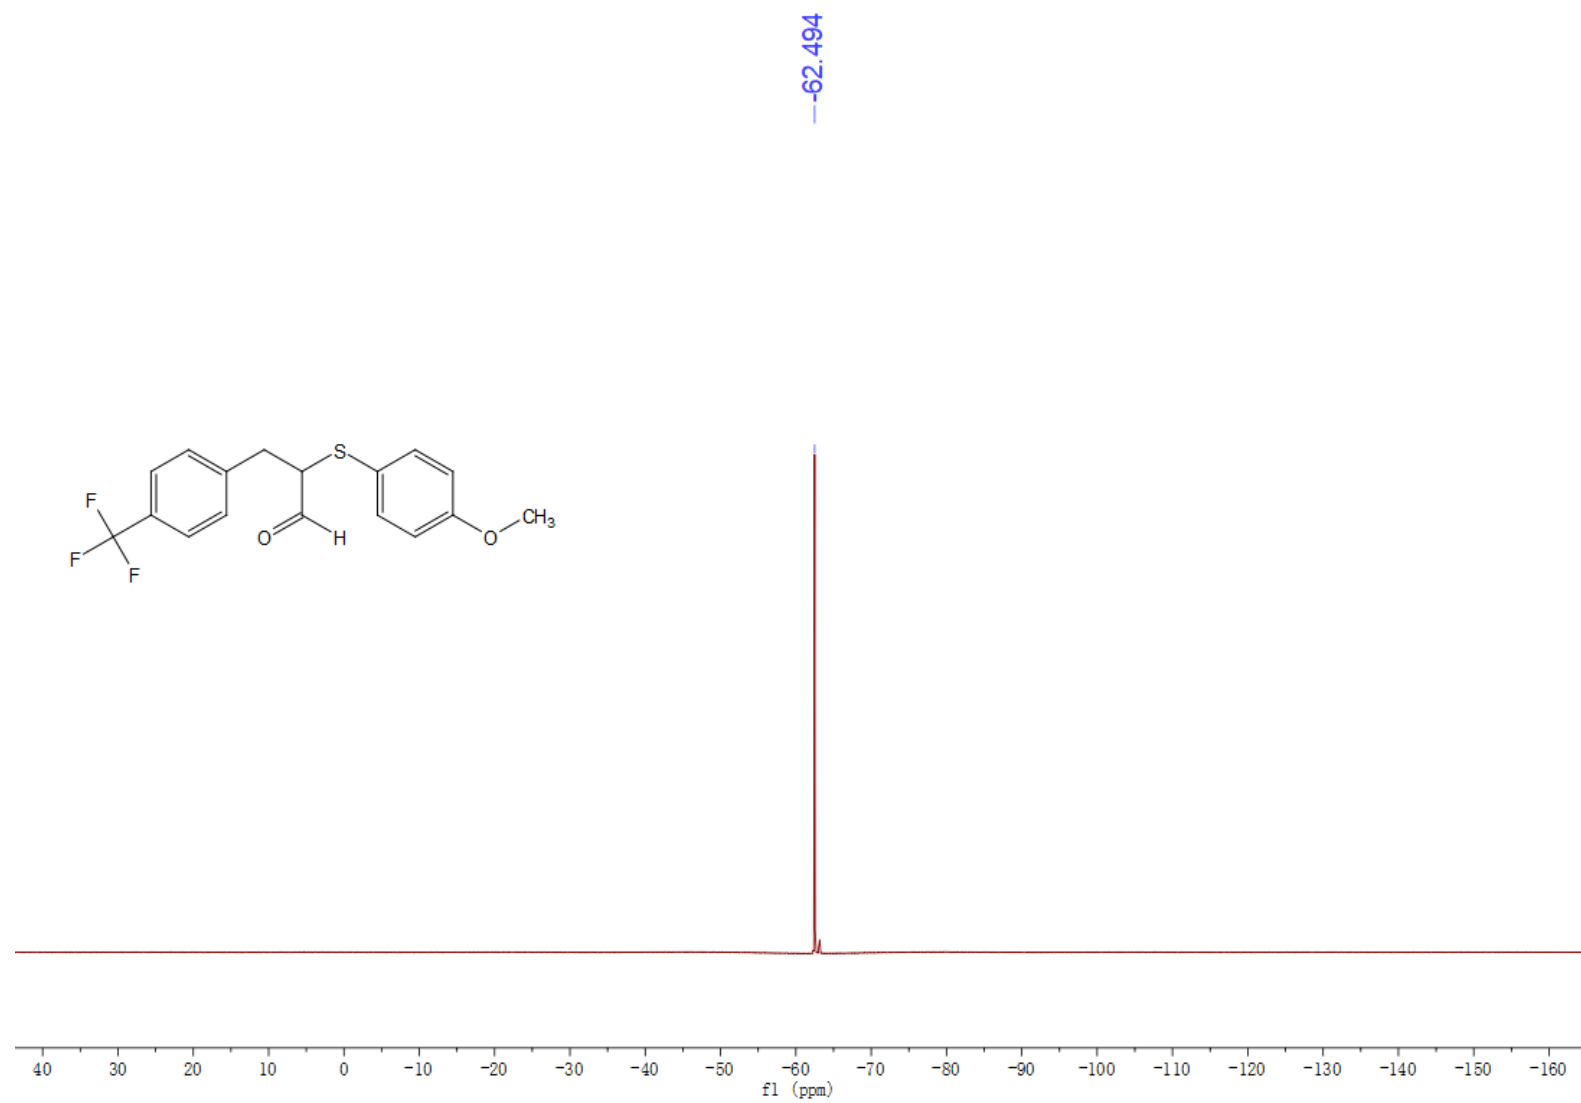



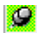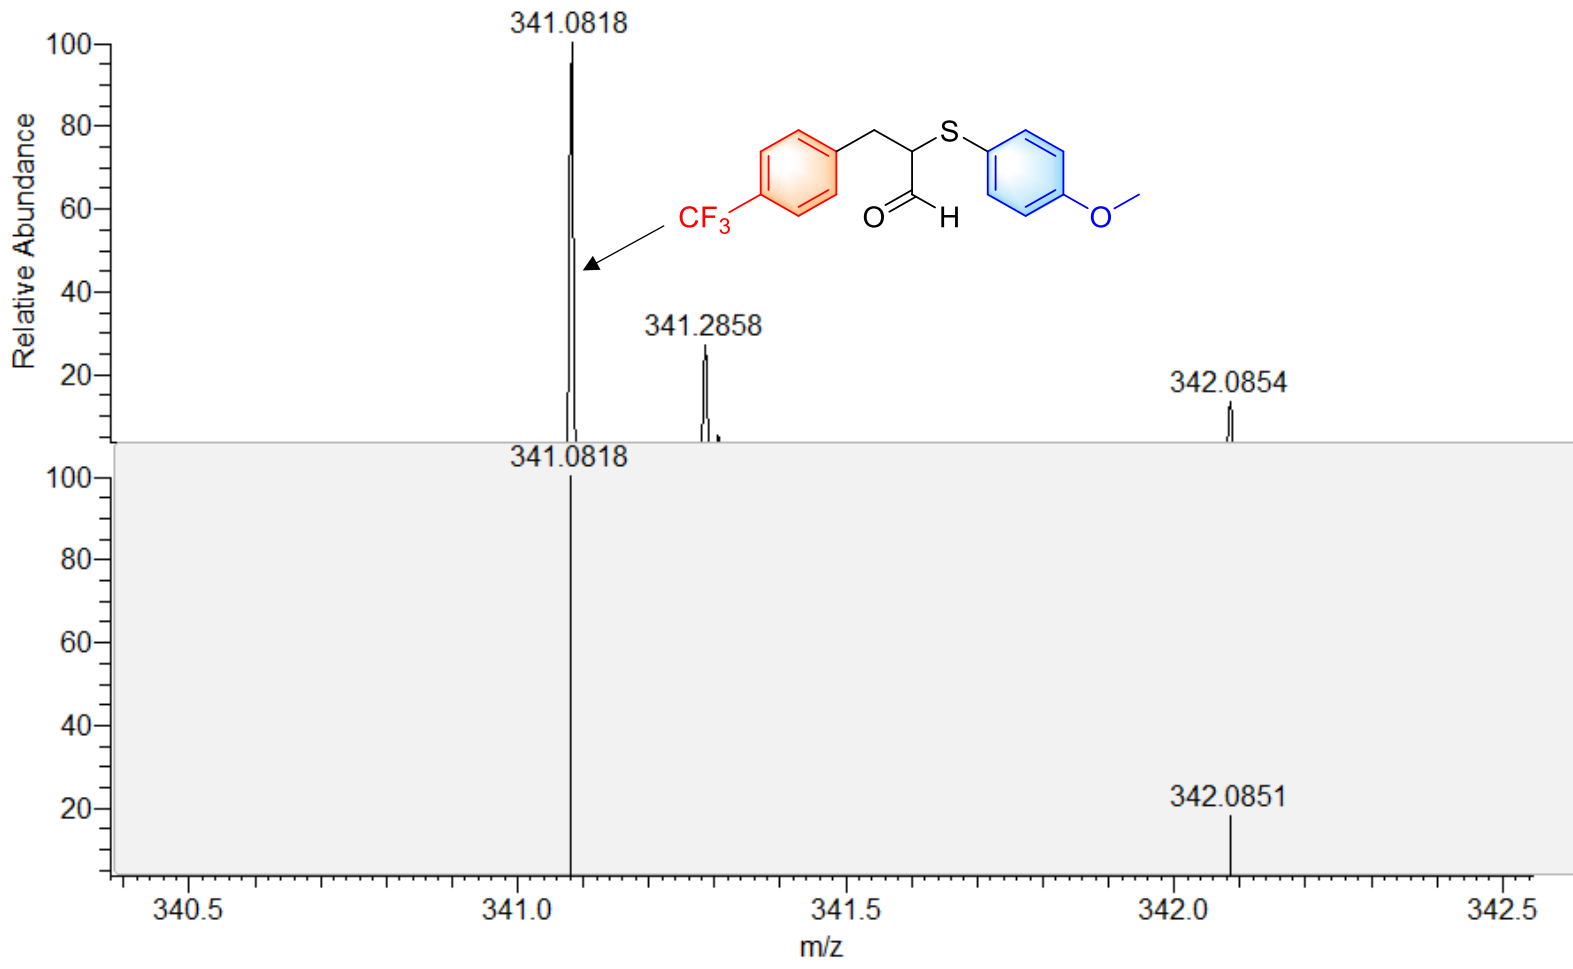

NL:  
3.42E6  
MOUDAN-M32#80  
RT: 0.36 AV: 1 T:  
FTMS + p ESI Full  
lock ms  
[66.7000-1000.0000]

NL:  
7.85E5  
C<sub>17</sub> H<sub>15</sub> F<sub>3</sub> O<sub>2</sub> S +H:  
C<sub>17</sub> H<sub>16</sub> F<sub>3</sub> O<sub>2</sub> S<sub>1</sub>  
pa Chrg 1

**3-(4-bromophenyl)-2-((4-fluorophenyl)thio)propanal (3ci)**

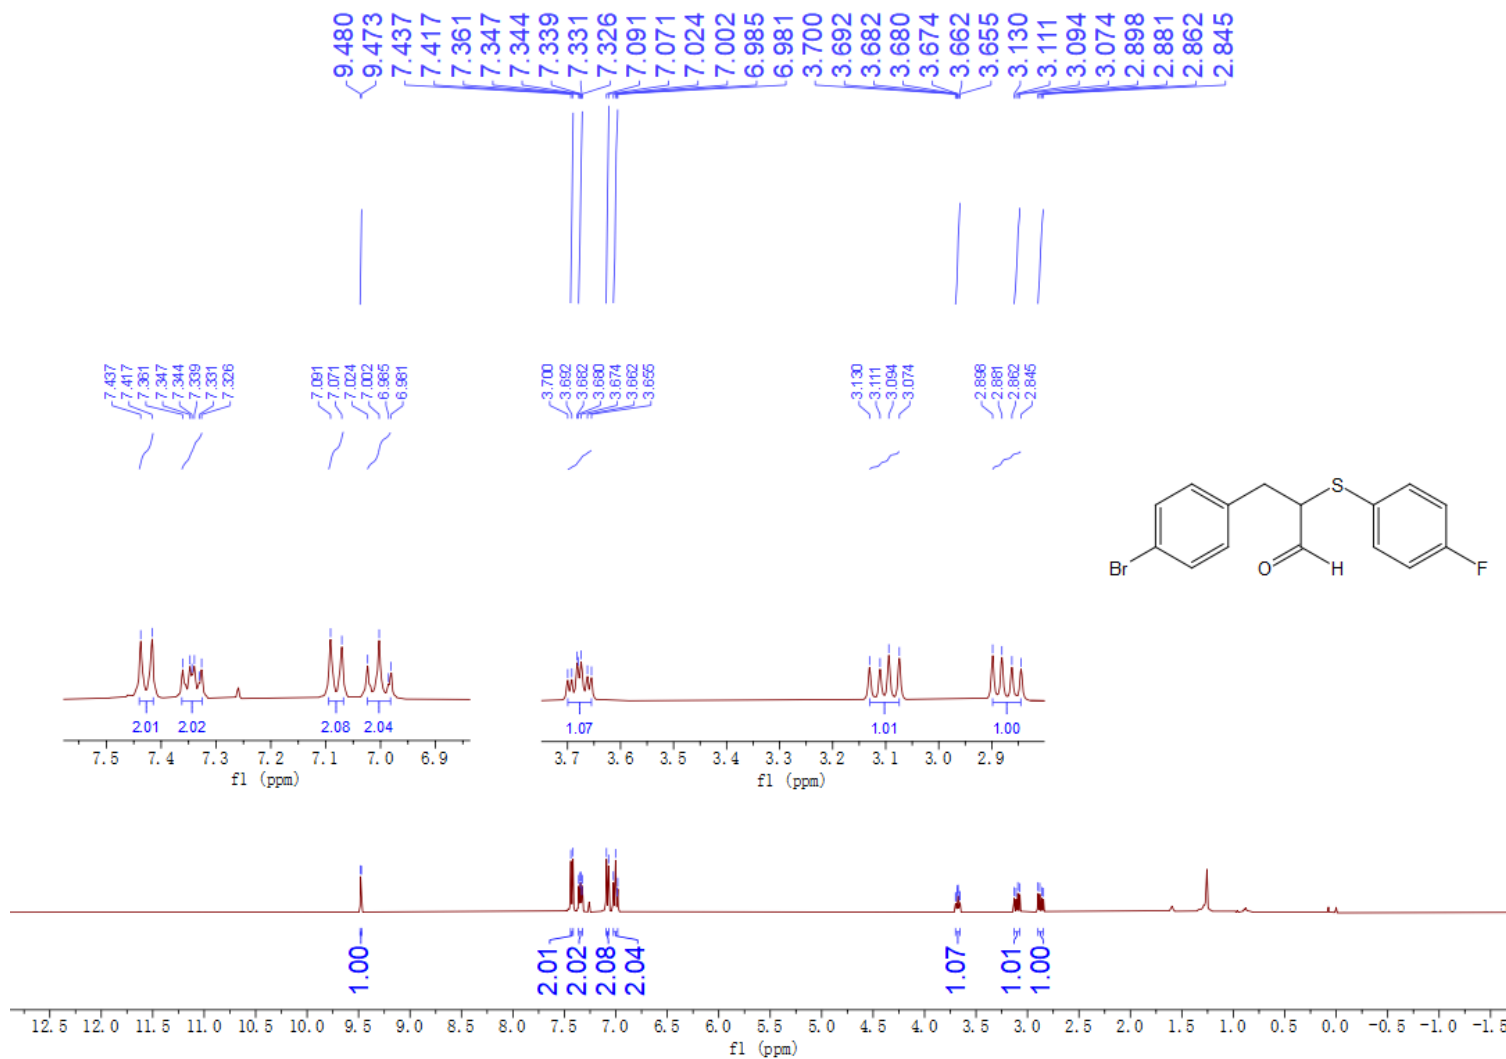

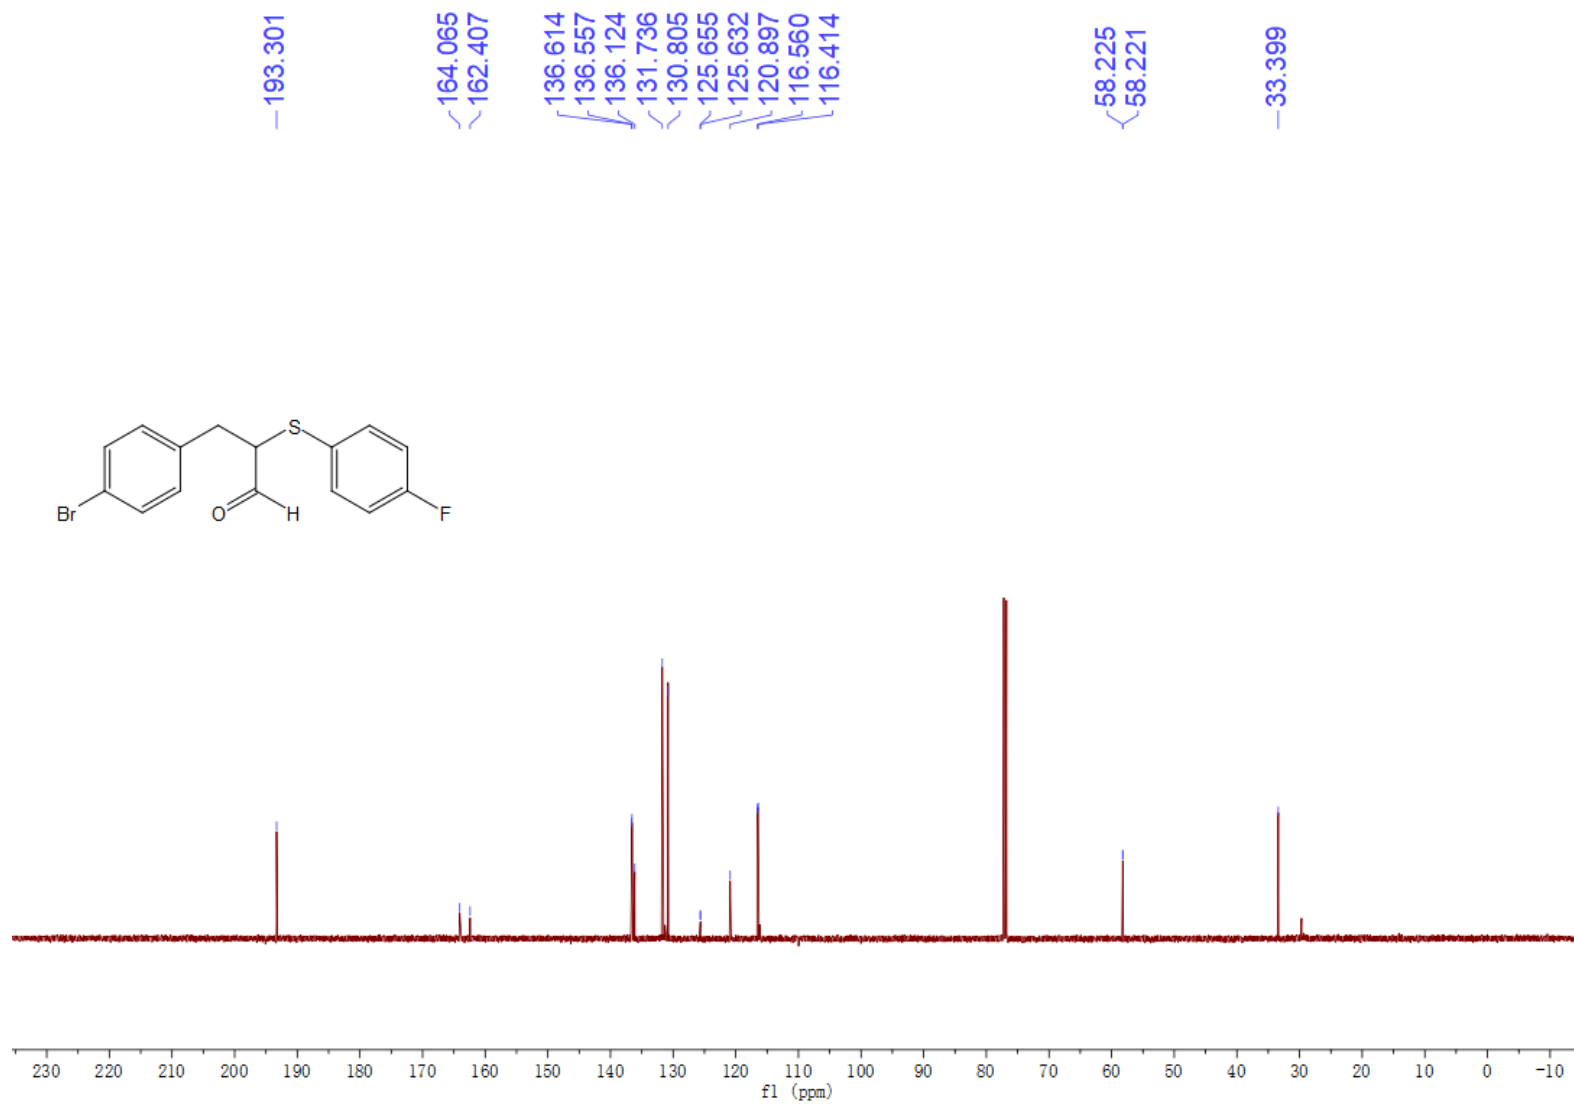

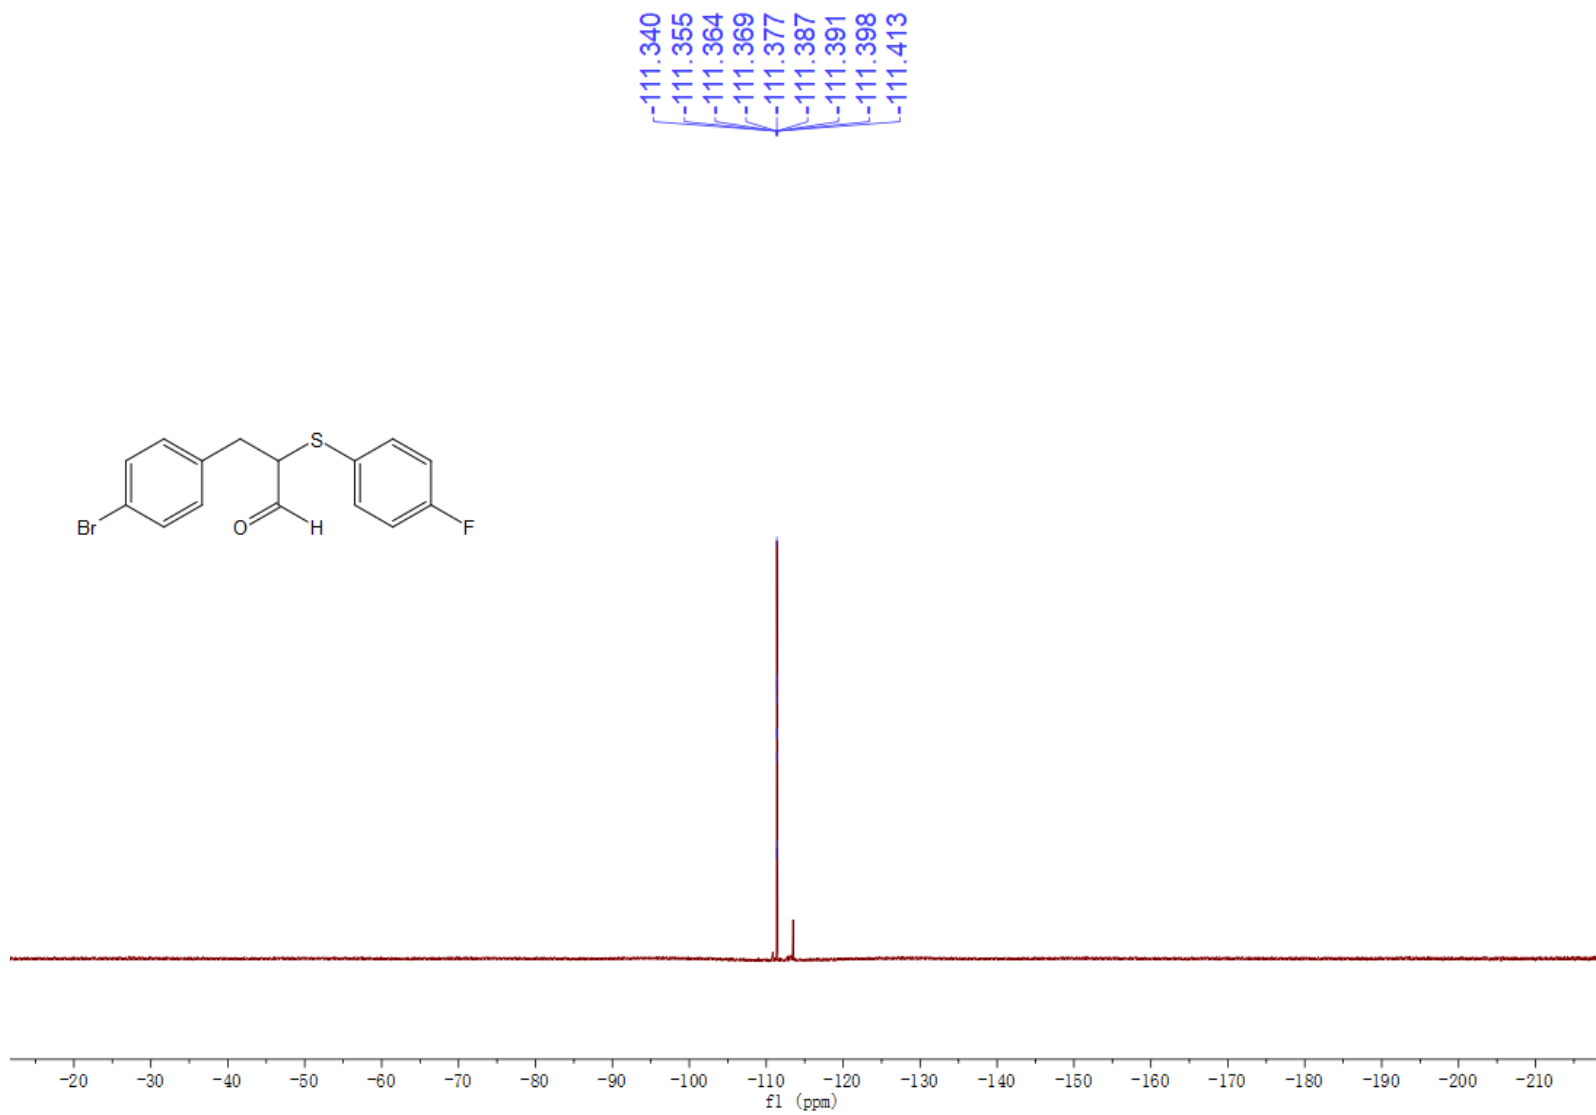

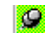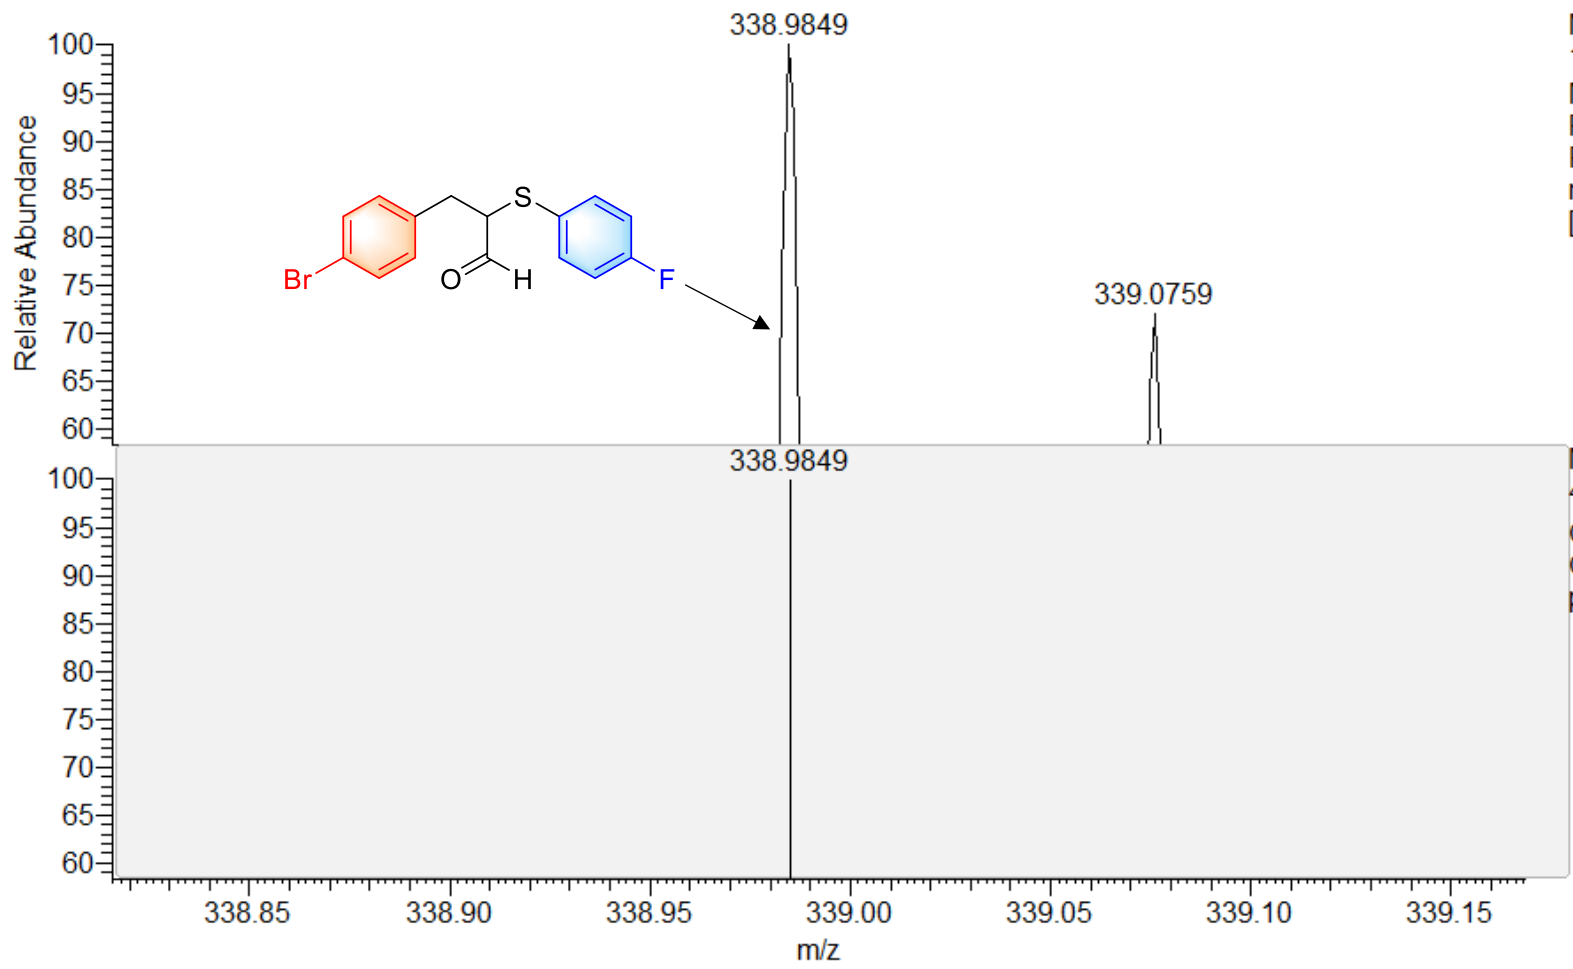

NL:  
1.41E5  
MOUDAN-M27#38  
RT: 0.17 AV: 1 T:  
FTMS + p ESI Full lock  
ms  
[66.7000-1000.0000]

NL:  
4.08E5  
C<sub>15</sub> H<sub>12</sub> BrFOS +H:  
C<sub>15</sub> H<sub>13</sub> Br<sub>1</sub> F<sub>1</sub> O<sub>1</sub> S<sub>1</sub>  
pa Chrg 1

**2-((4-bromophenyl)thio)-3-(4-(trifluoromethyl)phenyl)propanal (3cj)**

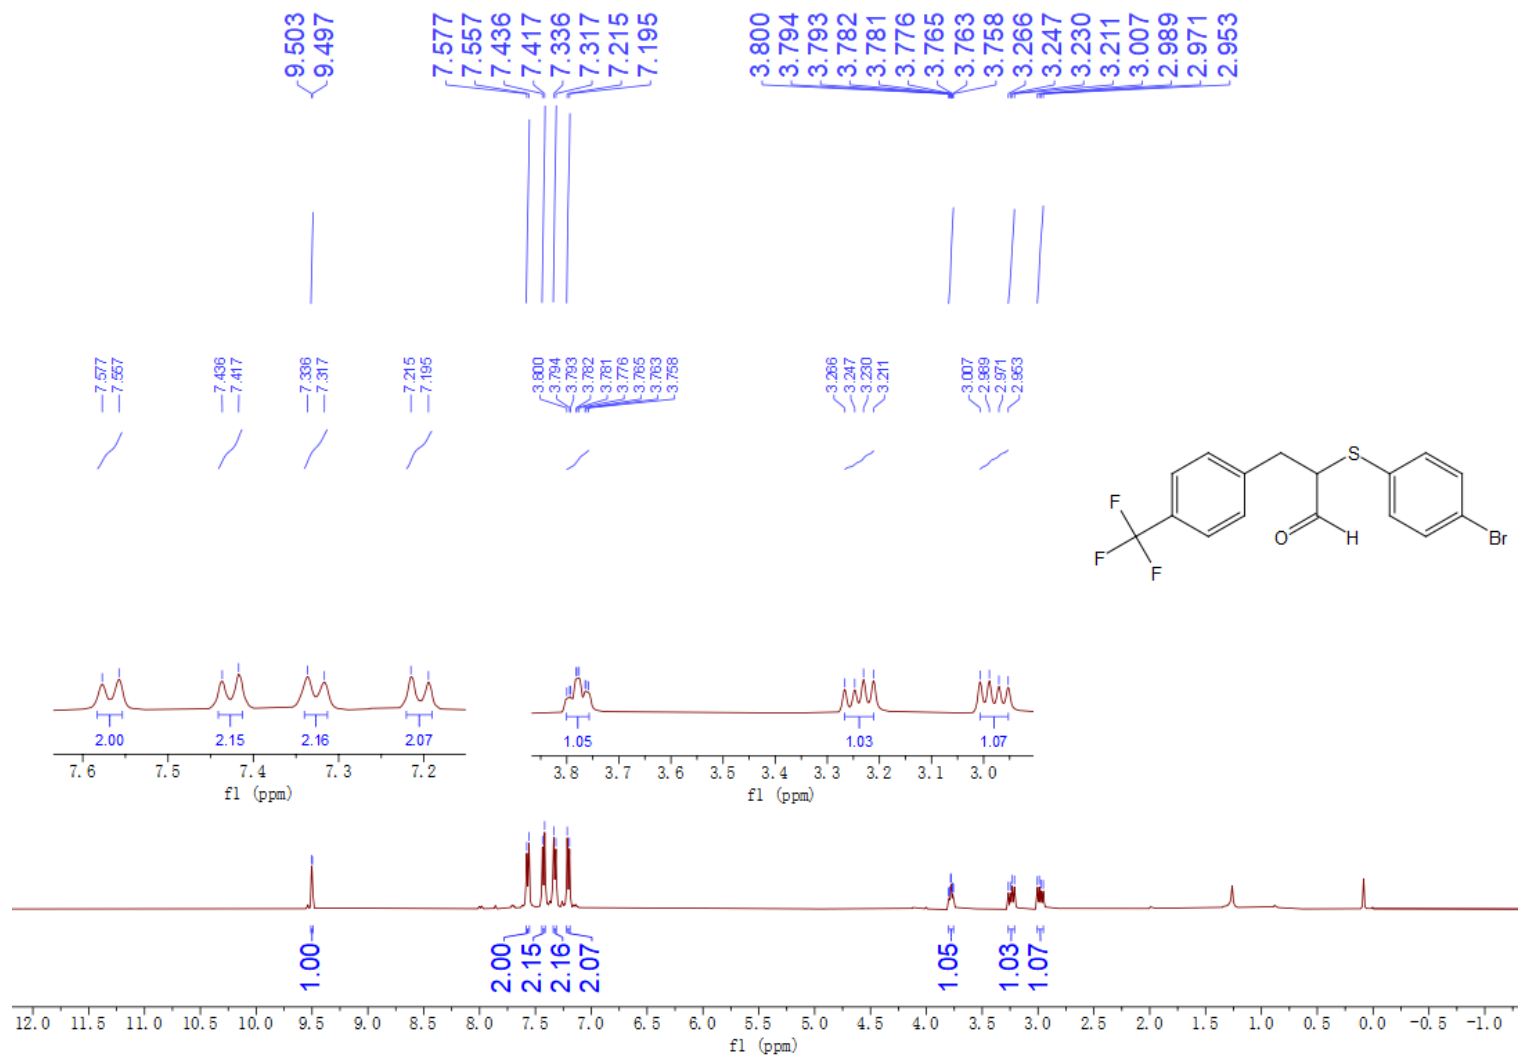

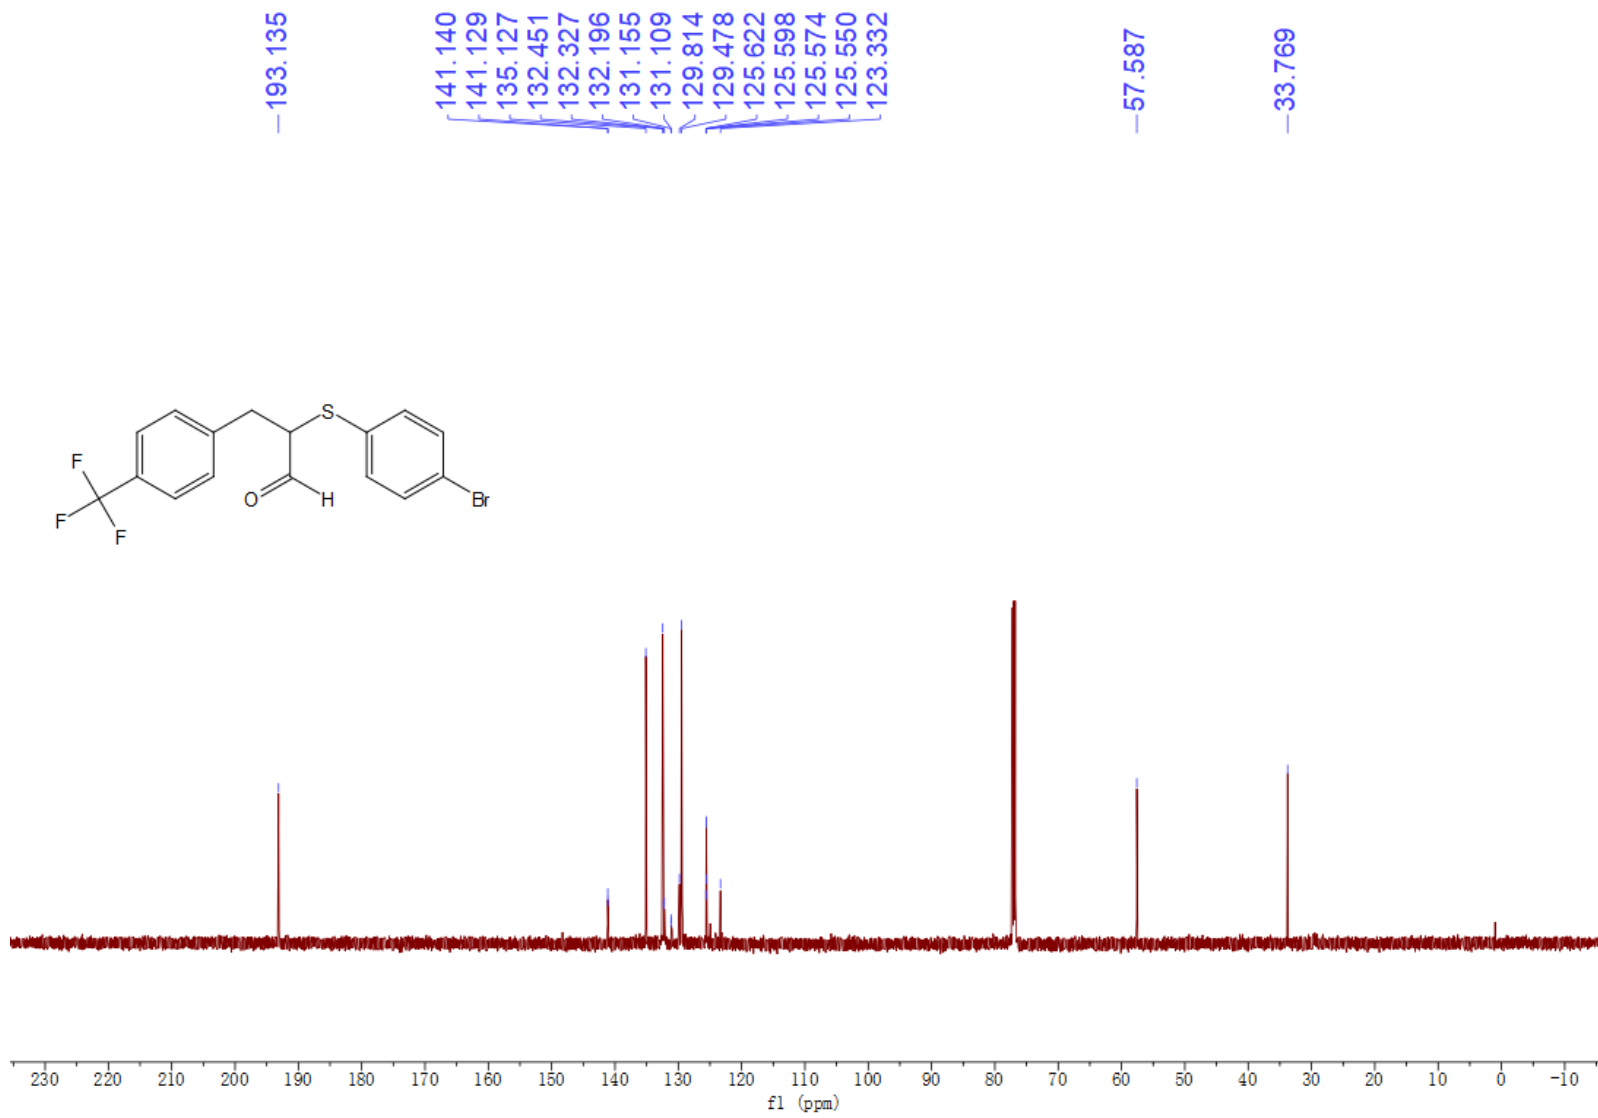

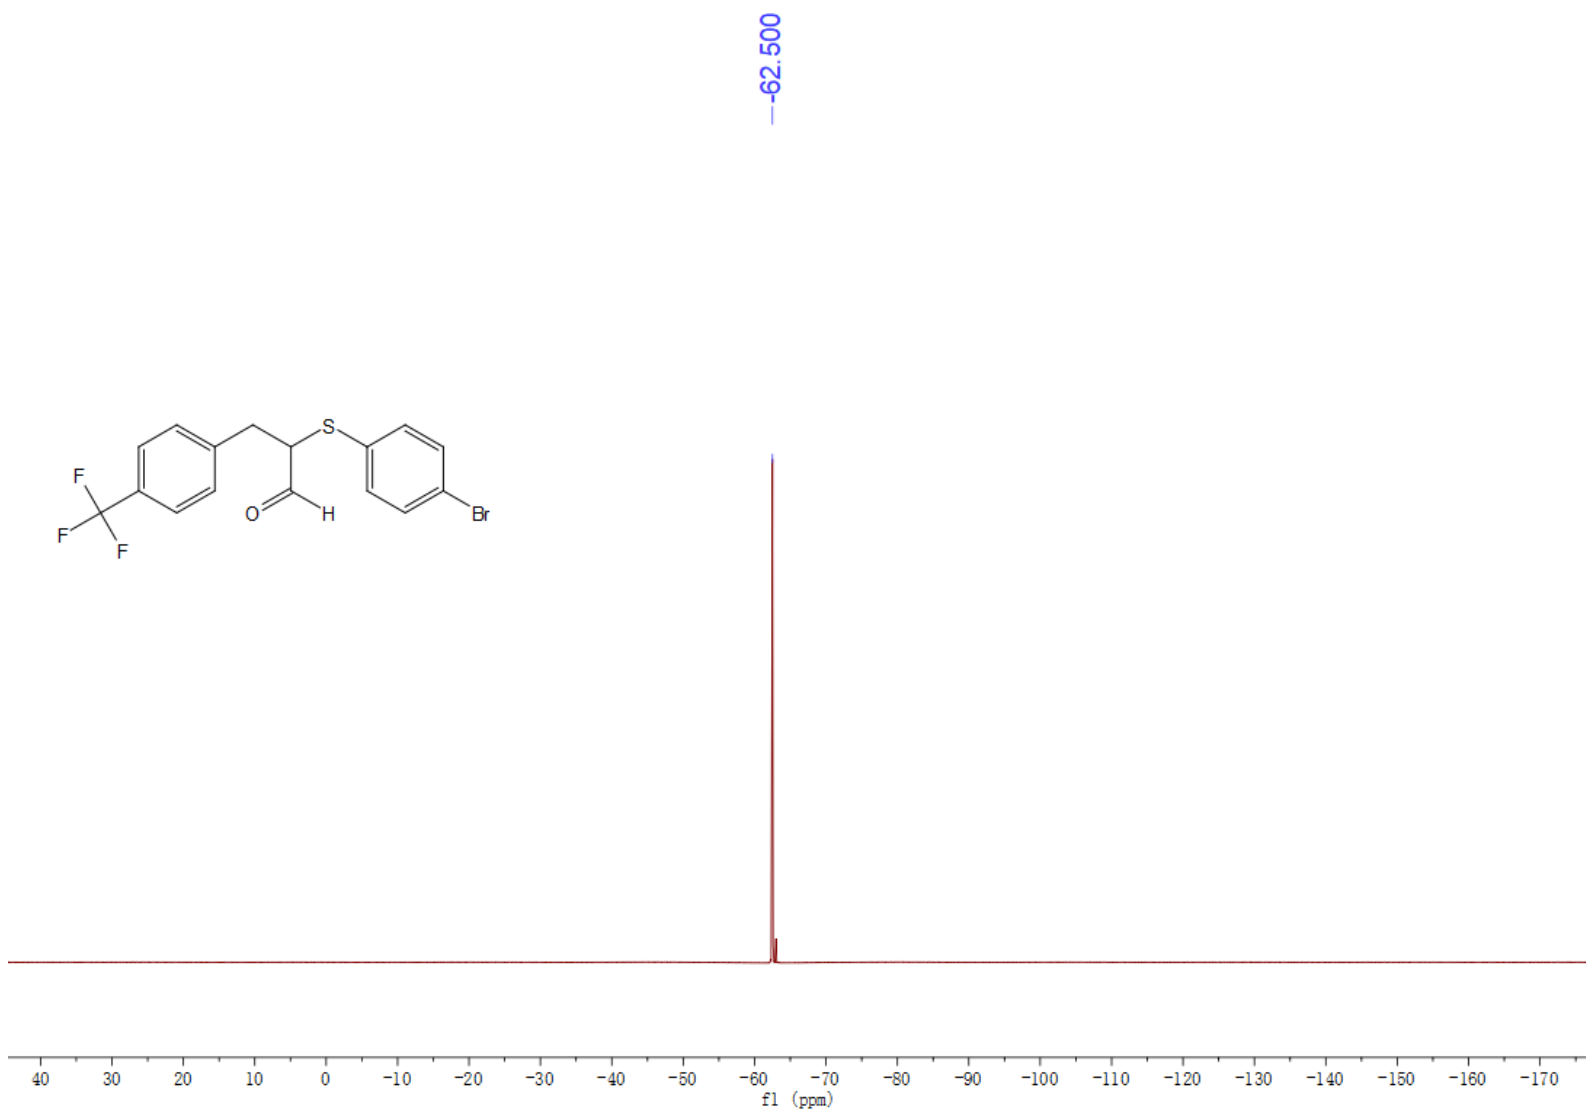



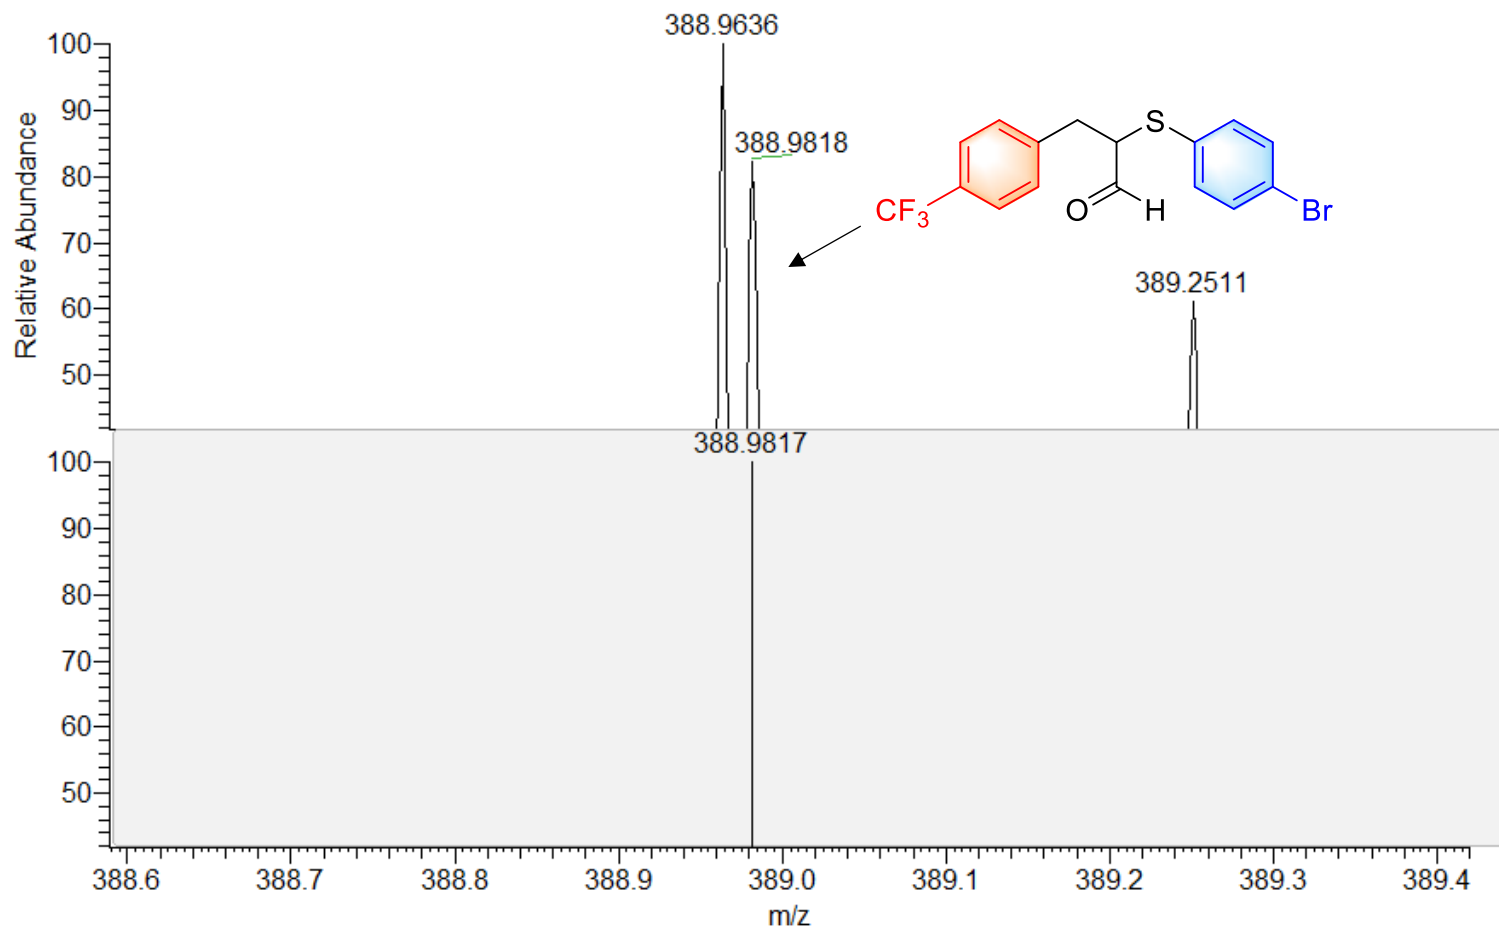

NL:  
 3.17E5  
 MOUDAN-M29#36  
 RT: 0.16 AV: 1 T:  
 FTMS + p ESI Full lock  
 ms  
 [50.0000-750.0000]

NL:  
 4.04E5  
 C<sub>16</sub> H<sub>12</sub> BrF<sub>3</sub> OS +H:  
 C<sub>16</sub> H<sub>13</sub> Br<sub>1</sub> F<sub>3</sub> O<sub>1</sub> S<sub>1</sub>  
 pa Chrg 1

### 4-phenyl-3-(*p*-tolylthio)butan-2-one (3da)

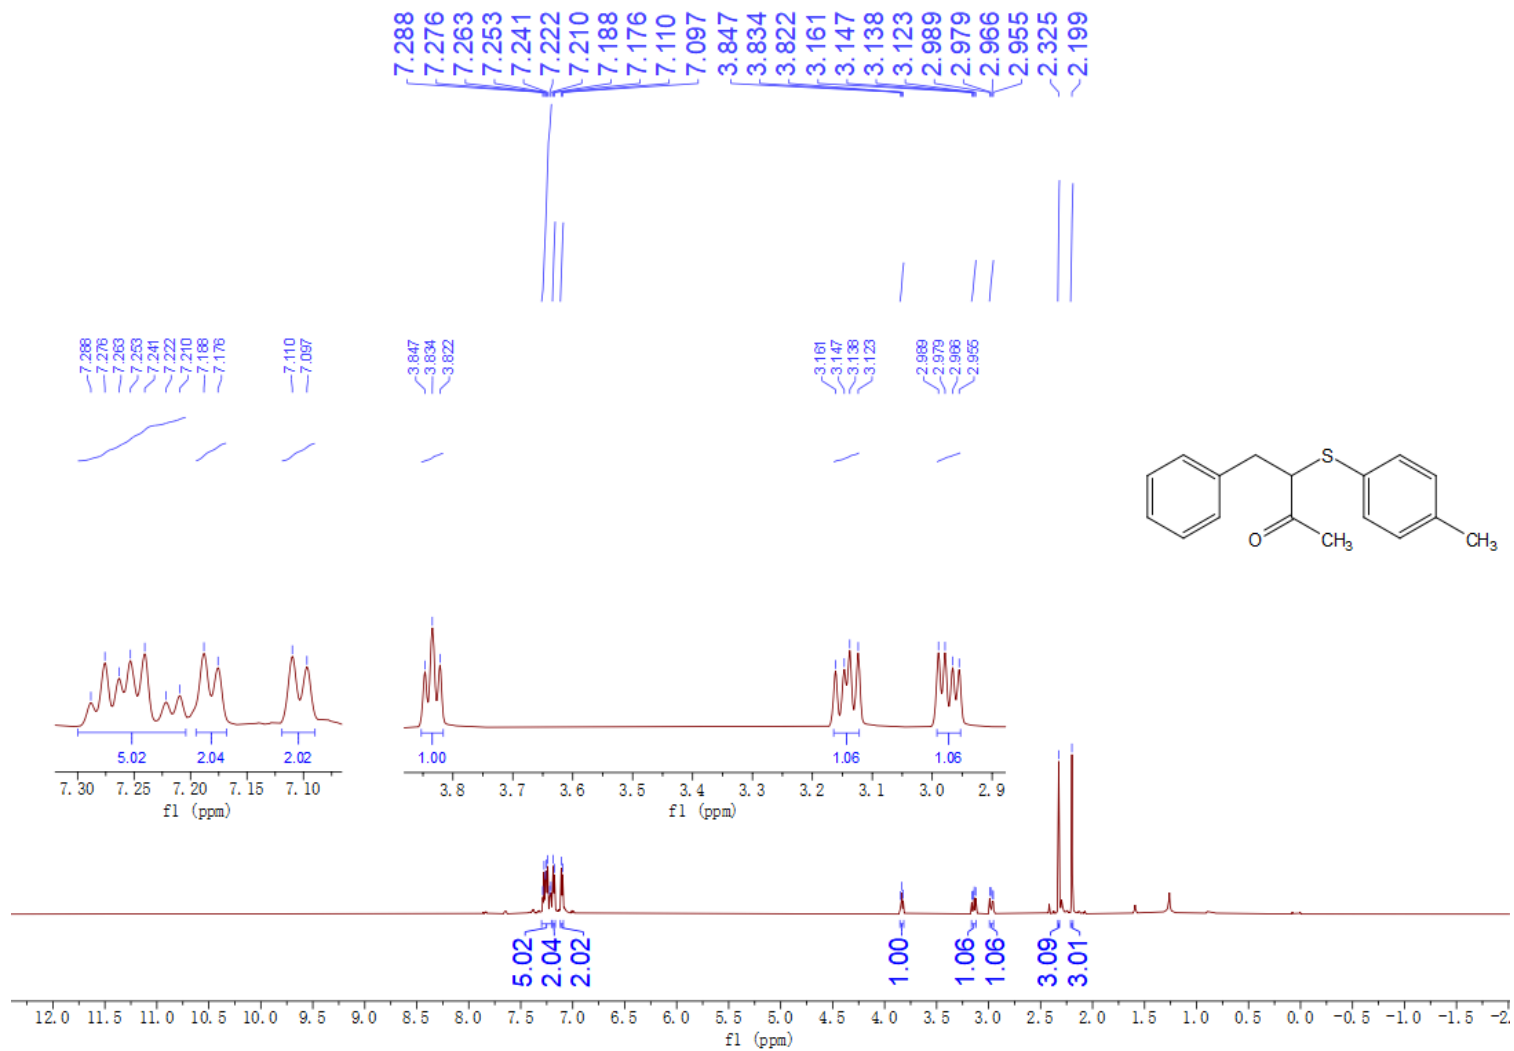

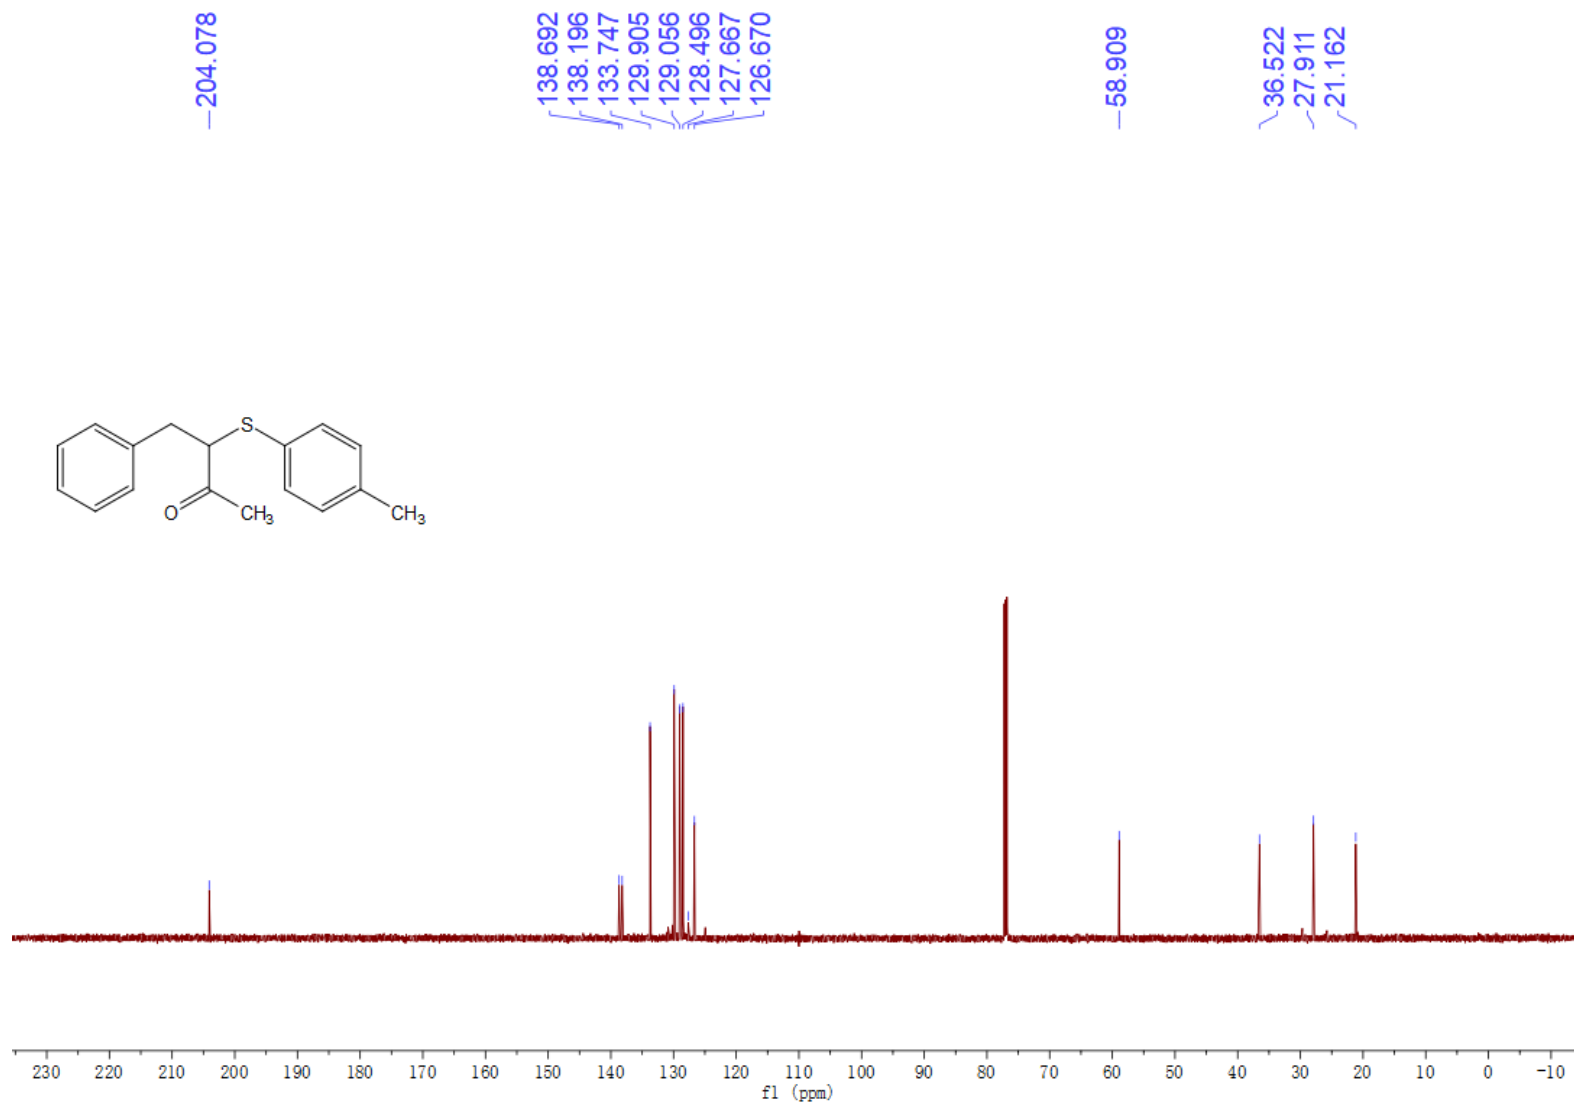

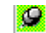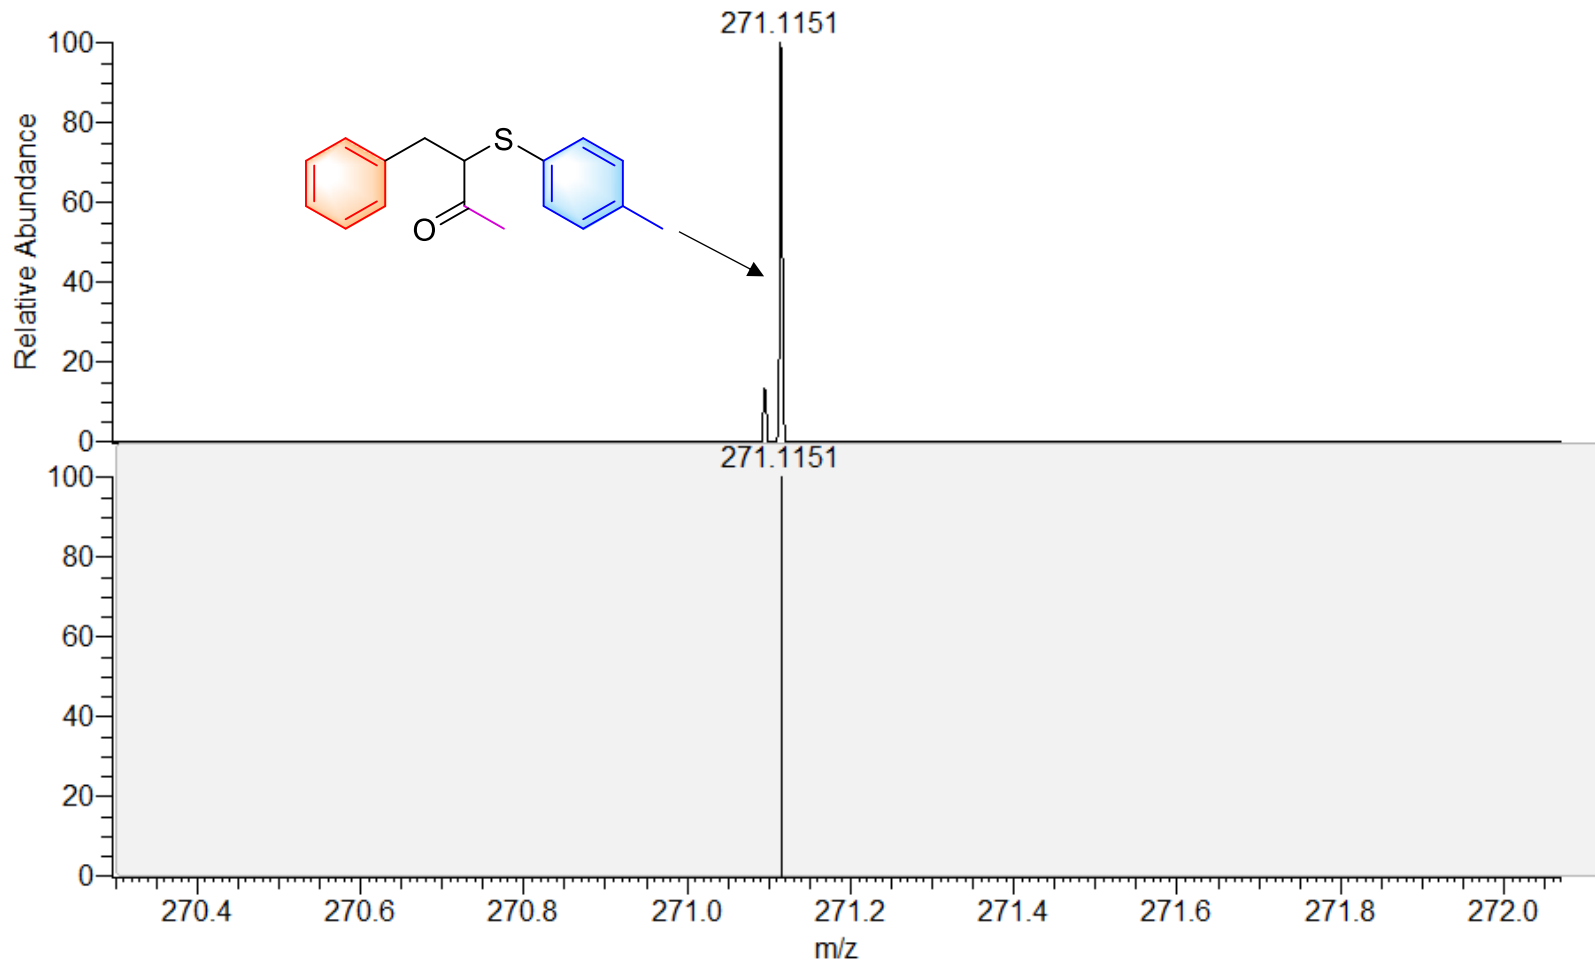

NL:  
8.76E5  
MOUDAN-M24#23  
RT: 0.10 AV: 1 T:  
FTMS + p ESI Full  
lock ms  
[60.0000-900.0000]

NL:  
7.87E5  
C<sub>17</sub> H<sub>18</sub> OS +H:  
C<sub>17</sub> H<sub>19</sub> O<sub>1</sub> S<sub>1</sub>  
pa Chrg 1

**1-phenyl-2-(*p*-tolylthio)pentan-3-one (3db)**

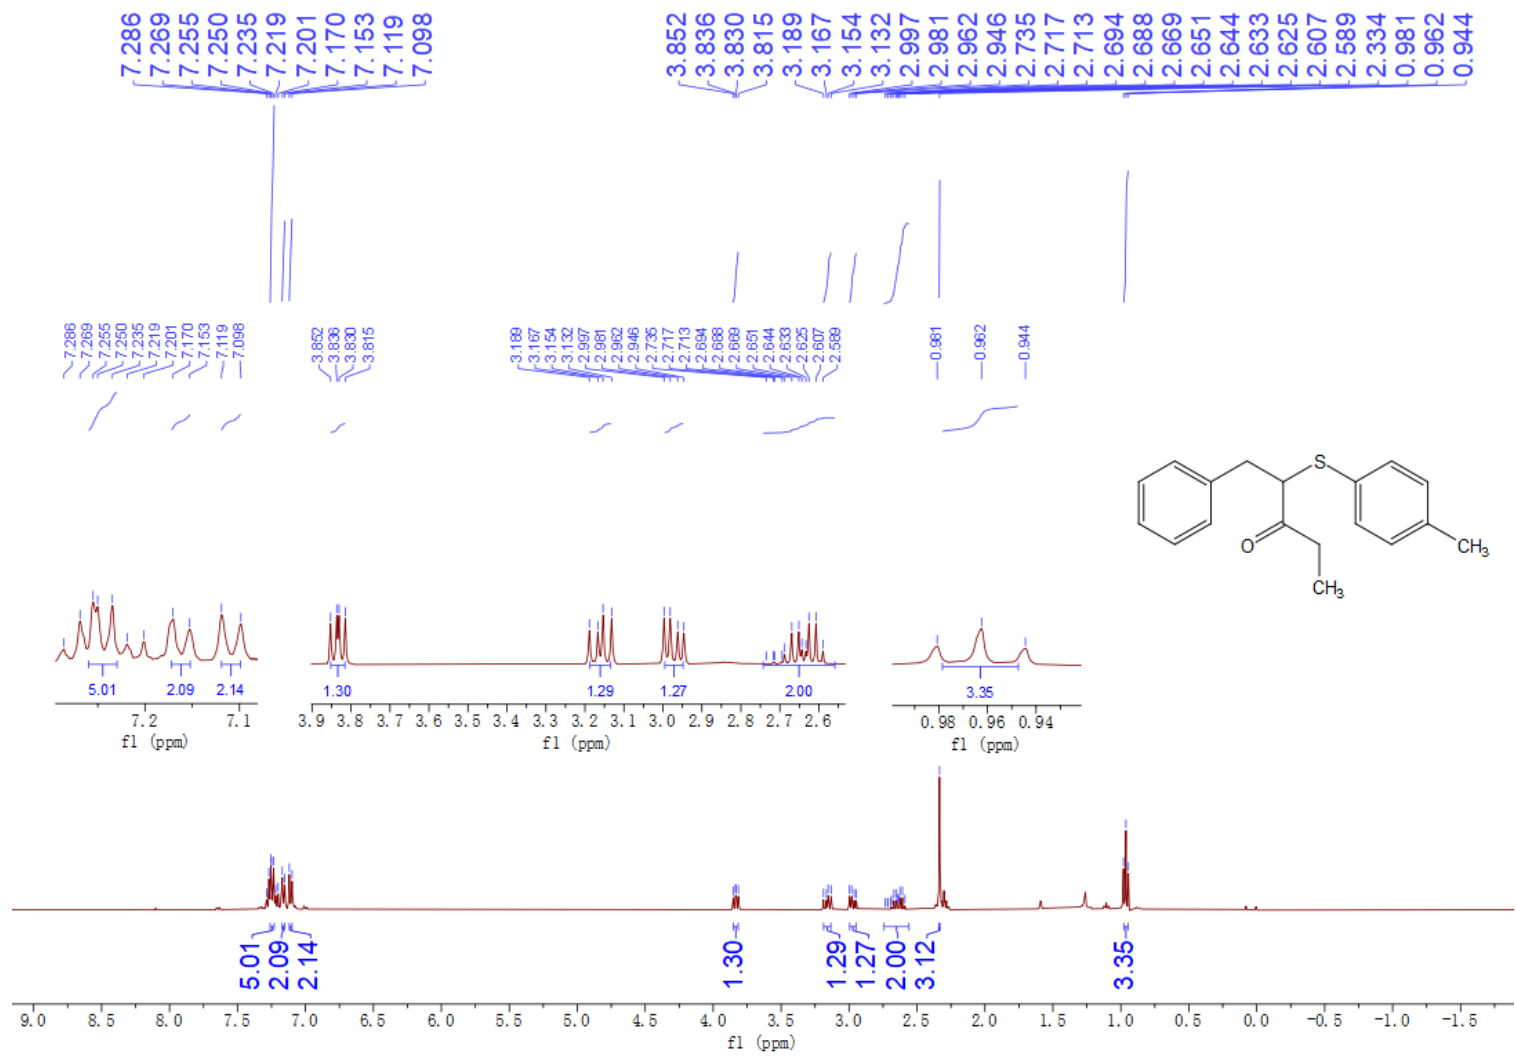

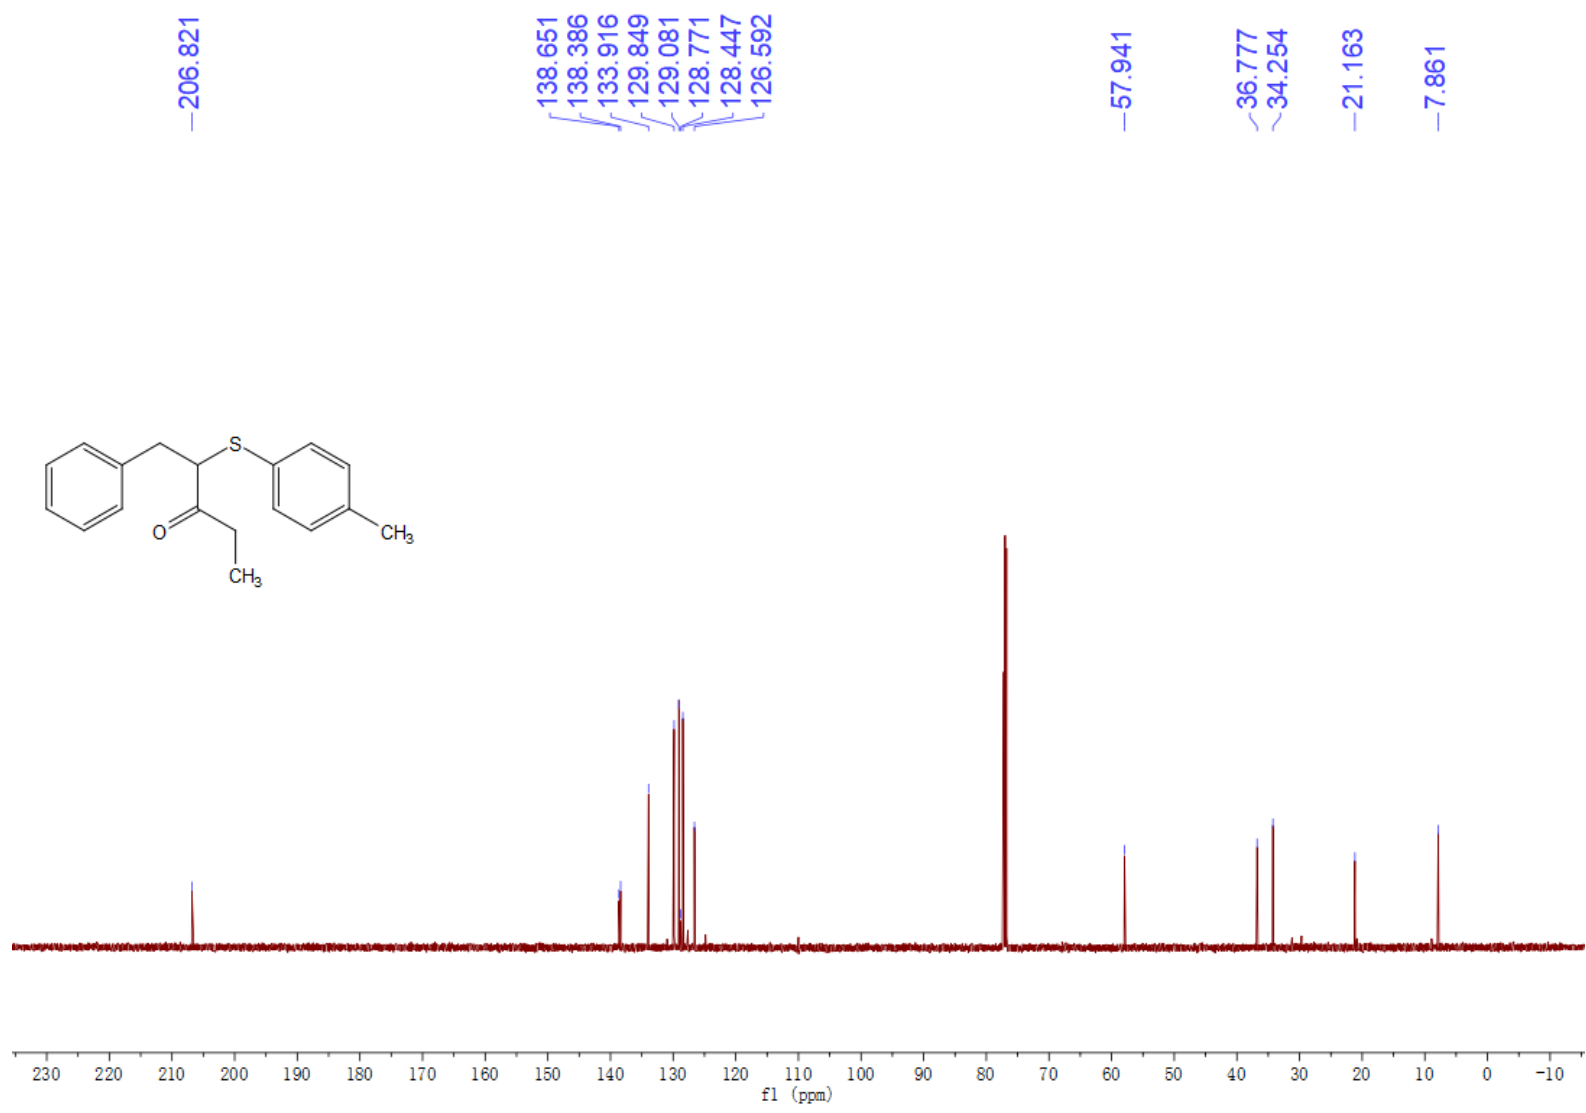

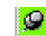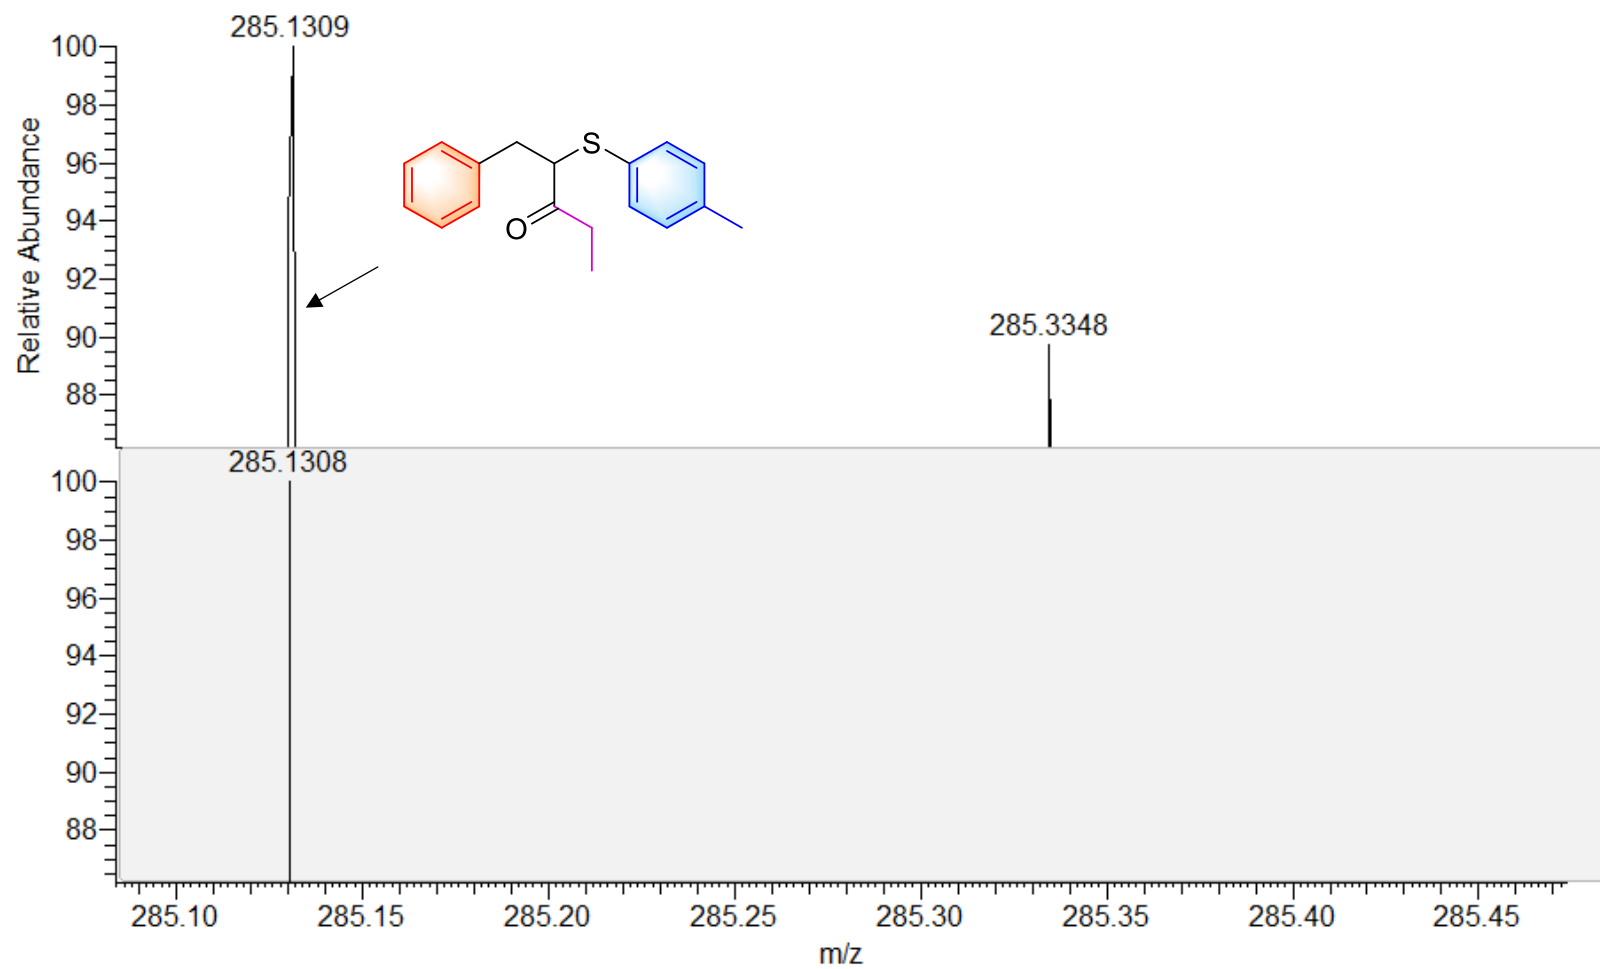

NL:  
8.06E4  
MOUDAN-M20#13  
RT: 0.06 AV: 1 T:  
FTMS + p ESI Full  
lock ms  
[60.0000-900.0000]

NL:  
7.78E5  
C<sub>18</sub> H<sub>20</sub> OS +H:  
C<sub>18</sub> H<sub>21</sub> O<sub>1</sub> S<sub>1</sub>  
pa Chrg 1

**3-((4-bromophenyl)thio)-4-phenylbutan-2-one (3dc)**

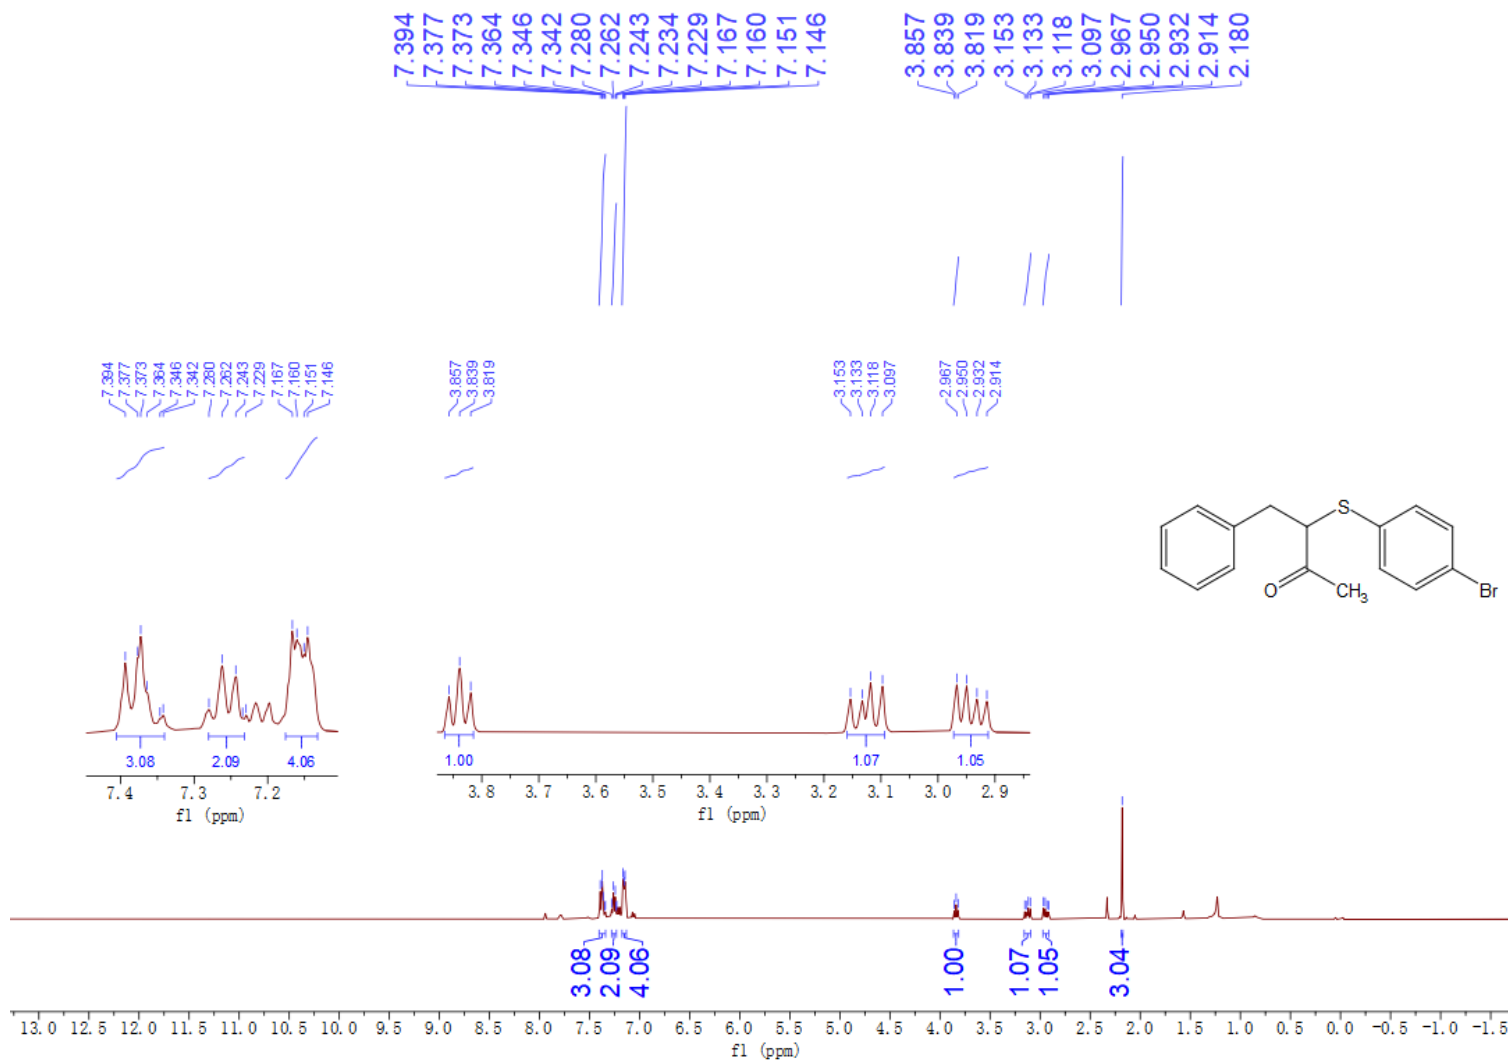



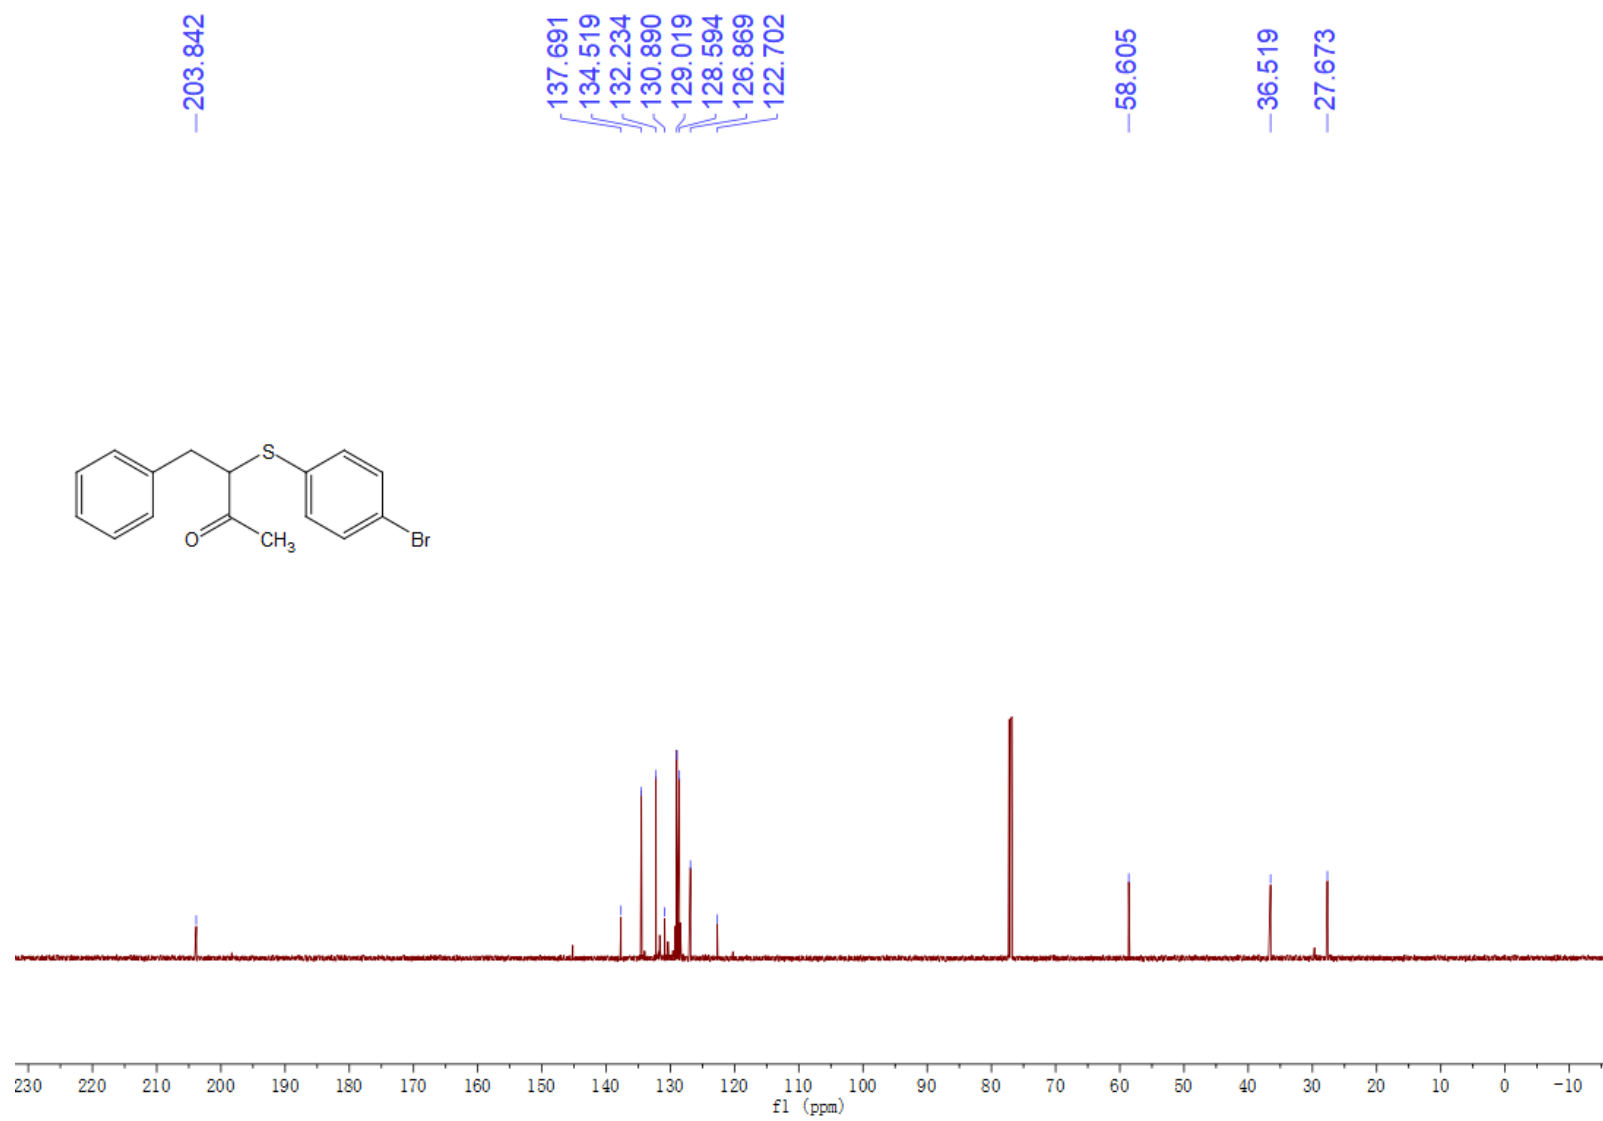

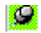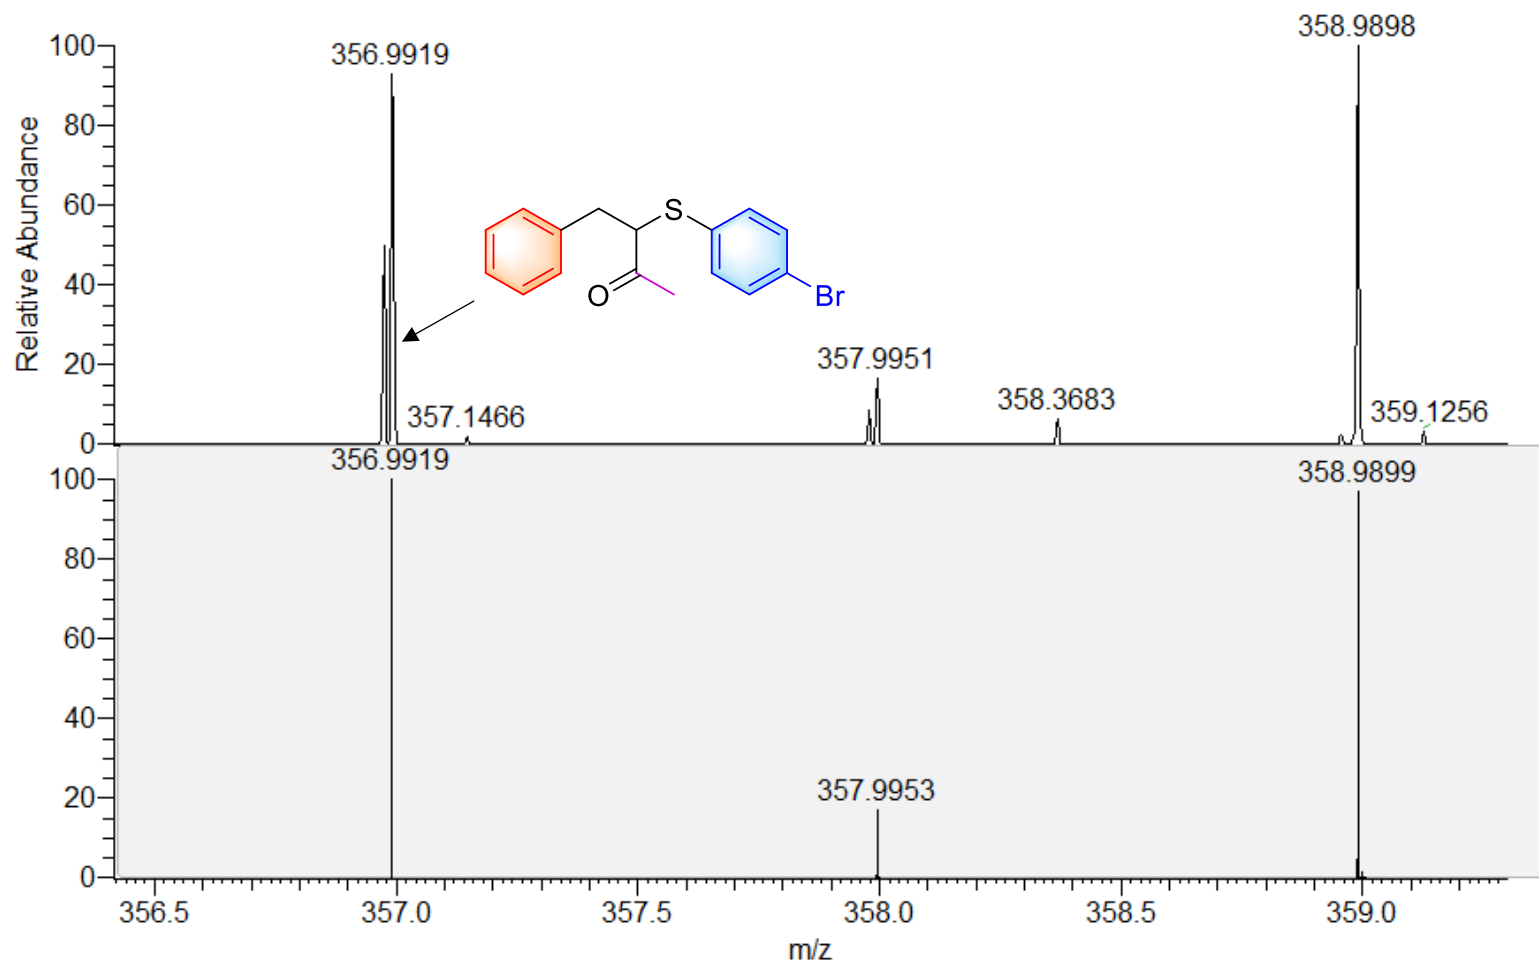

NL:  
5.81E6  
MOUDAN-M30#1 RT:  
0.00 AV: 1 T: FTMS + p  
ESI Full lock ms  
[66.7000-1000.0000]

NL:  
4.03E5  
C<sub>16</sub> H<sub>15</sub> BrOS +Na:  
C<sub>16</sub> H<sub>15</sub> Br<sub>1</sub> O<sub>1</sub> S<sub>1</sub> Na<sub>1</sub>  
pa Chrg 1

**2-((4-bromophenyl)thio)-1-phenylpentan-3-one (3dd)**

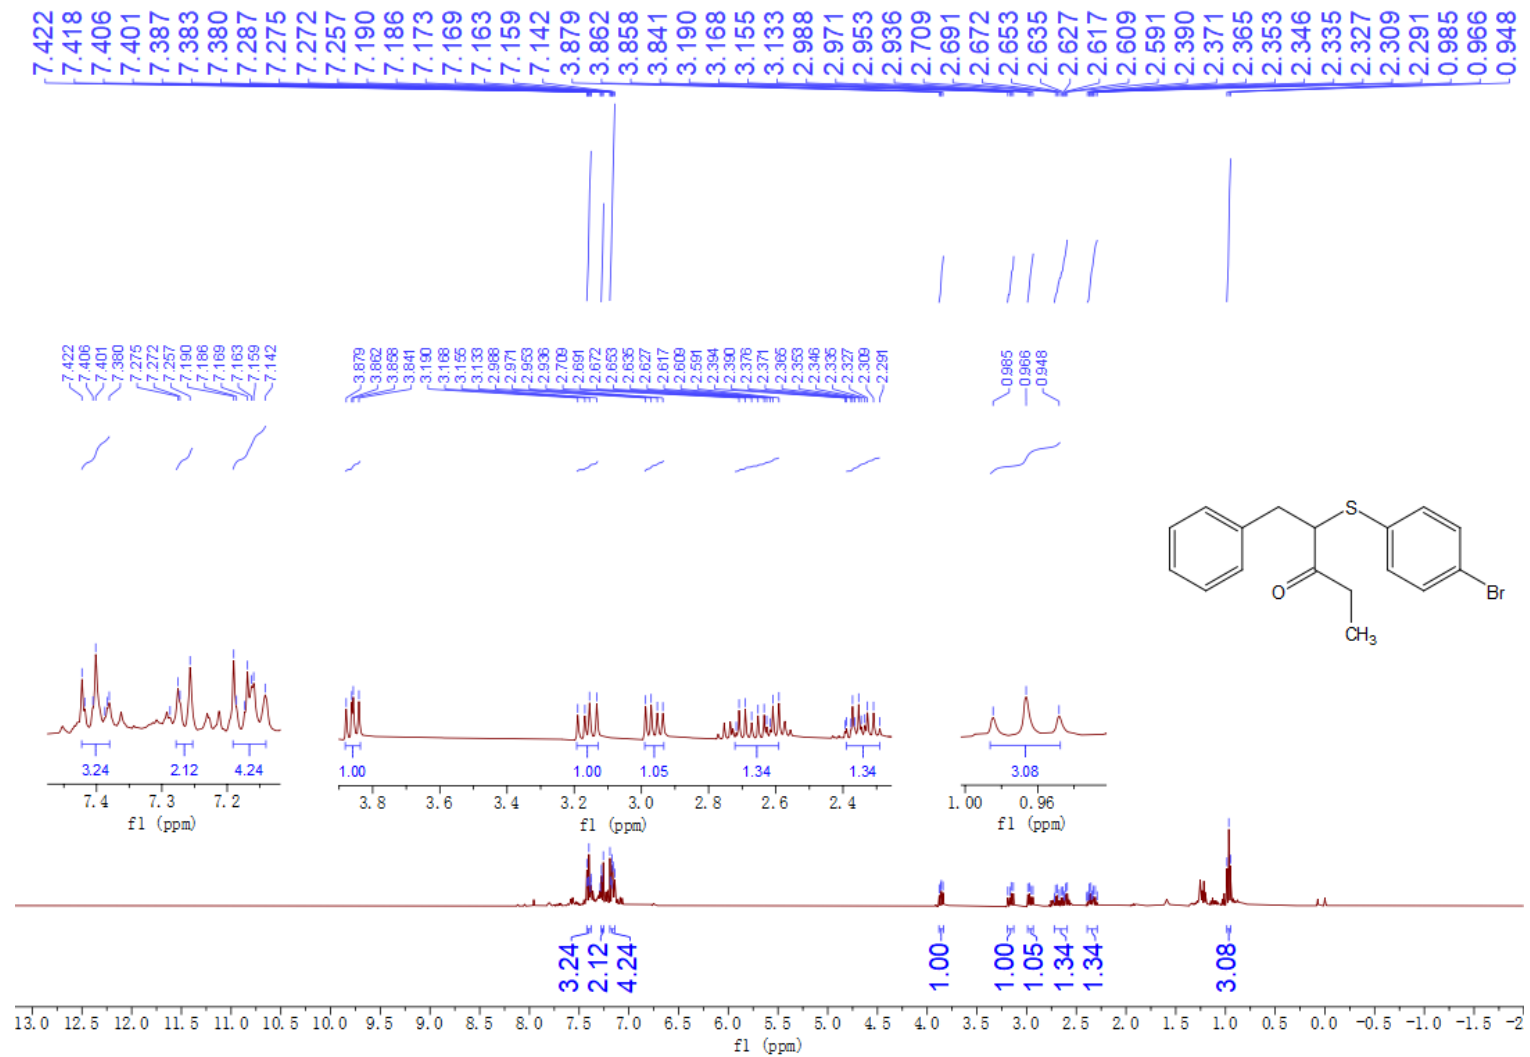

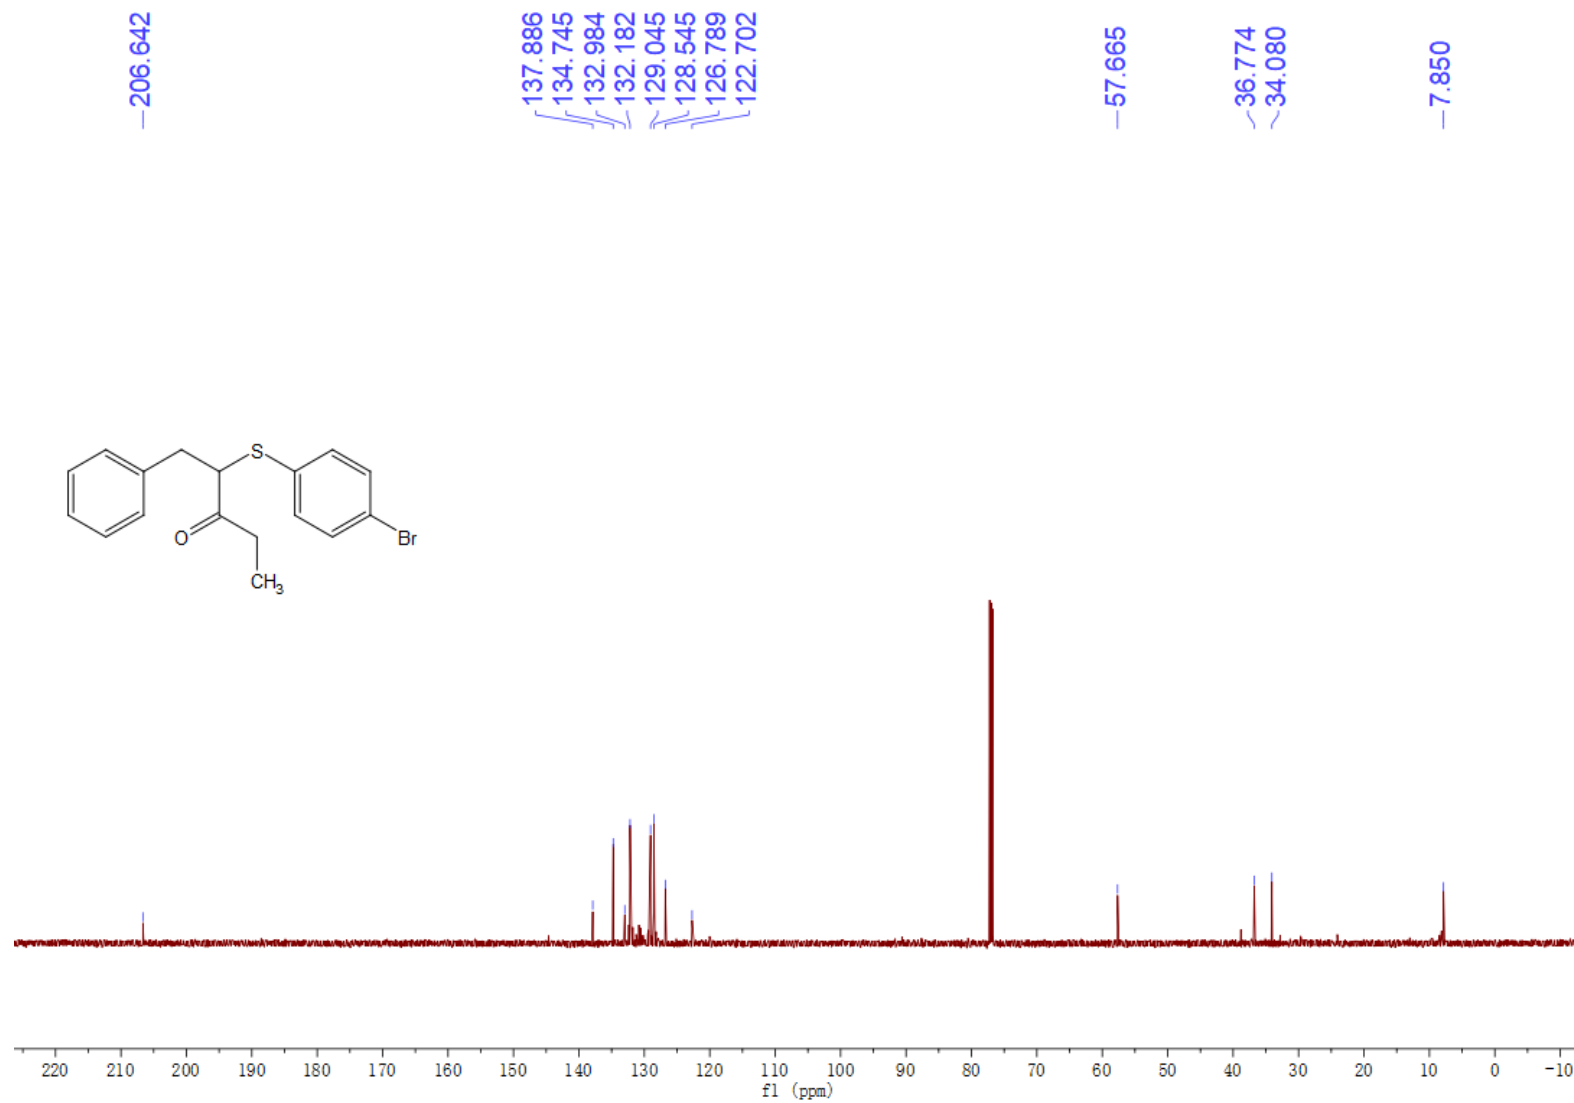

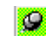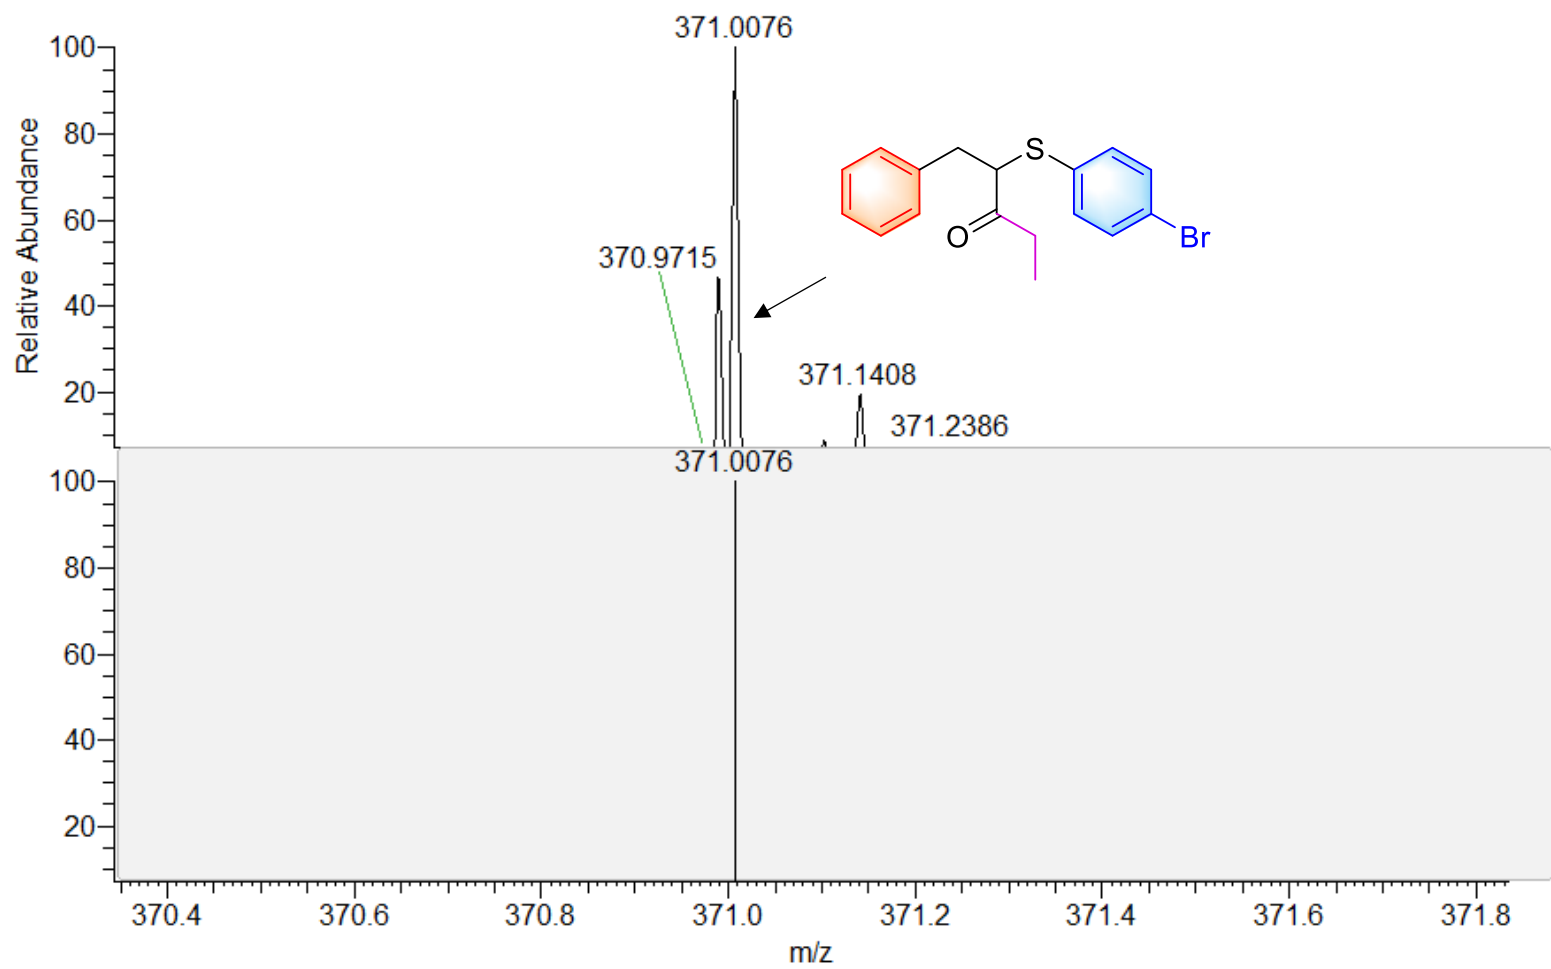

NL:  
5.07E6  
MOUDAN-M31#1 RT:  
0.00 AV: 1 T: FTMS + p  
ESI Full lock ms  
[66.7000-1000.0000]

NL:  
3.99E5  
C<sub>17</sub> H<sub>17</sub> BrOS +Na:  
C<sub>17</sub> H<sub>17</sub> Br<sub>1</sub> O<sub>1</sub> S<sub>1</sub> Na<sub>1</sub>  
pa Chrg 1

2-(*p*-tolylthio)butanal (3de)

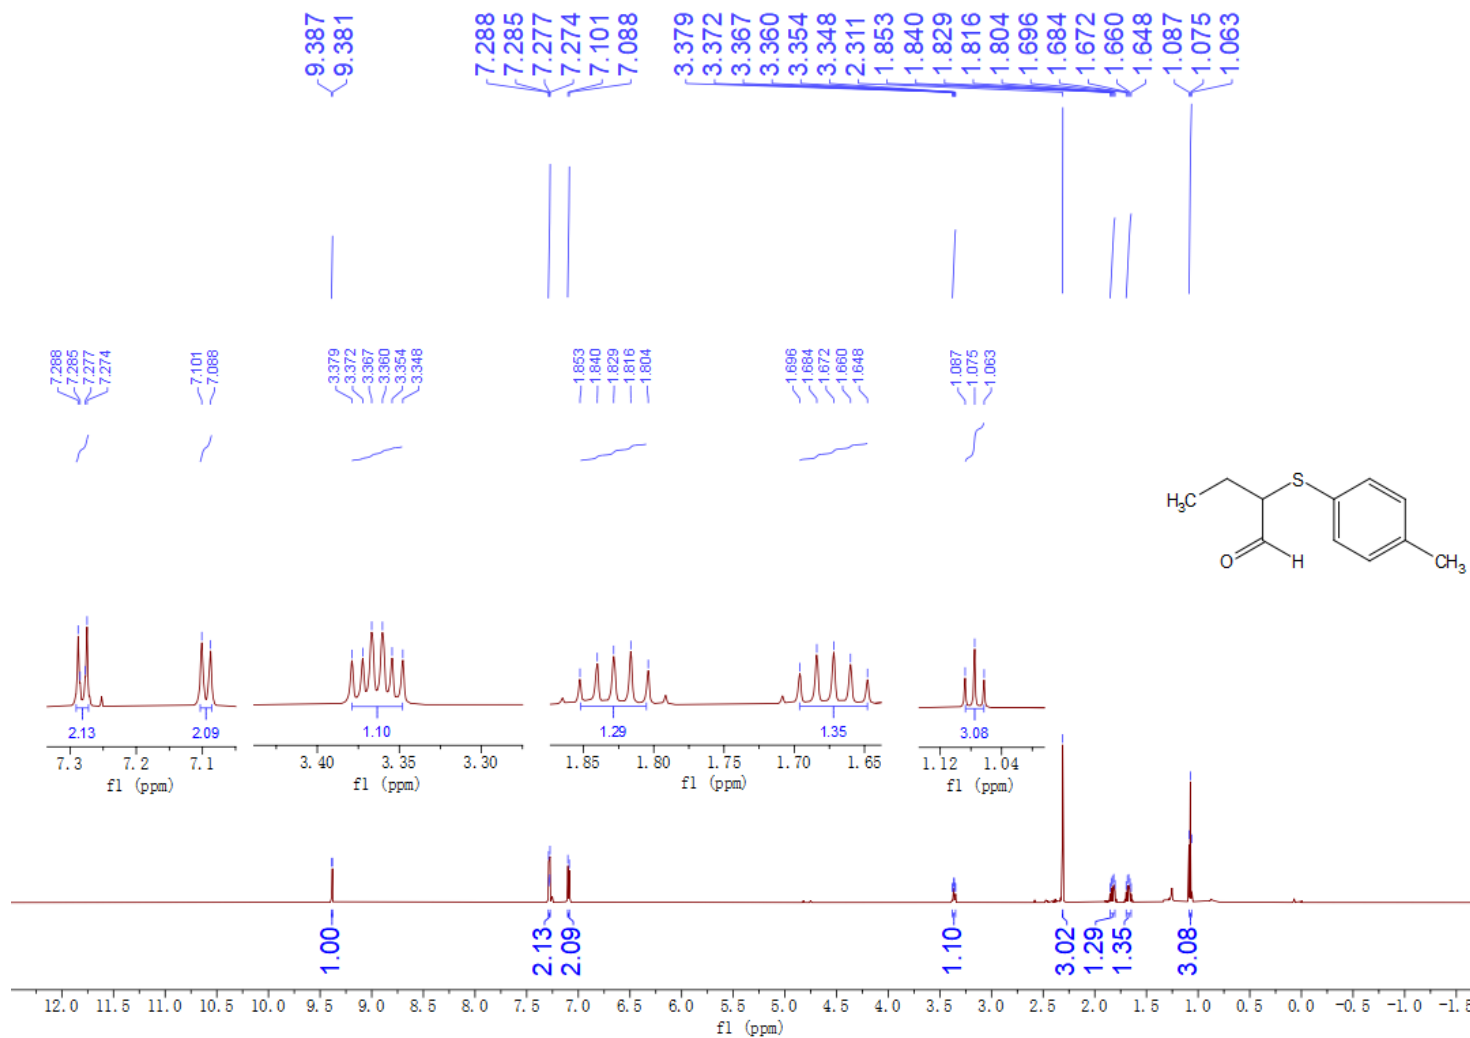

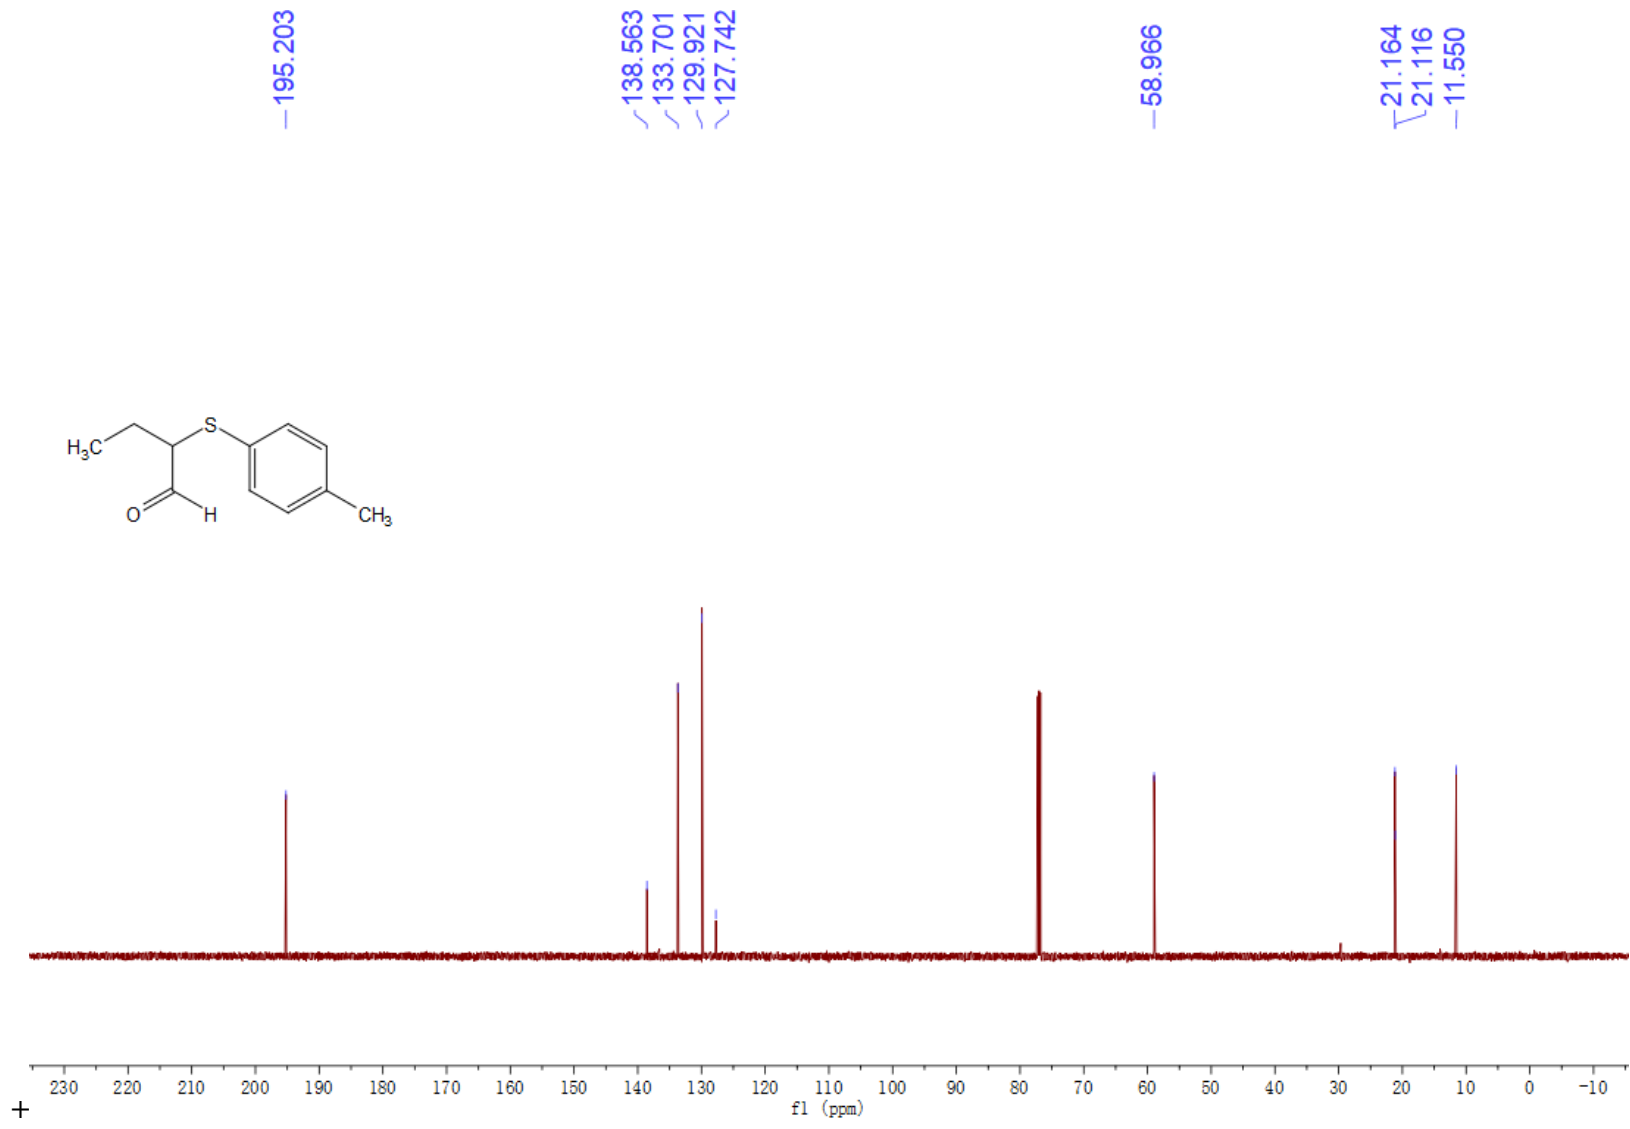

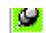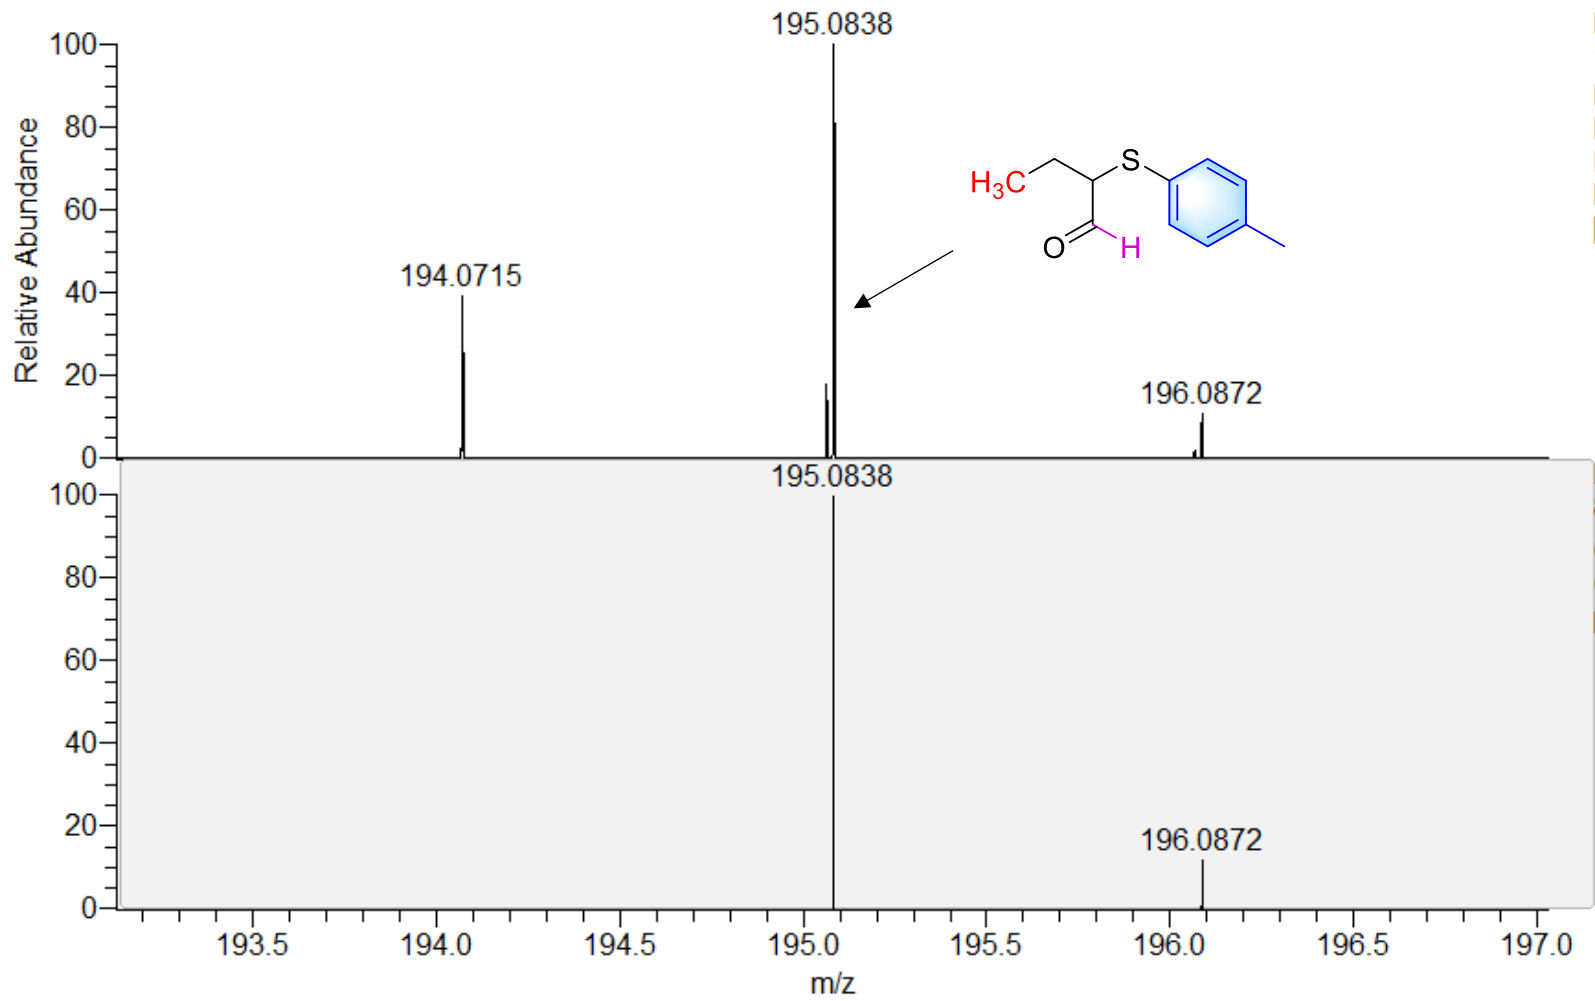

NL:  
1.91E7  
MOUDAN-M56#5  
RT: 0.02 AV: 1 T:  
FTMS + p ESI Full  
lock ms  
[60.0000-900.0000]

NL:  
8.40E5  
C<sub>11</sub>H<sub>14</sub>OS +H:  
C<sub>11</sub>H<sub>15</sub>O<sub>1</sub>S<sub>1</sub>  
pa Chrg 1



2-(*p*-tolylthio)pentanal (3df)

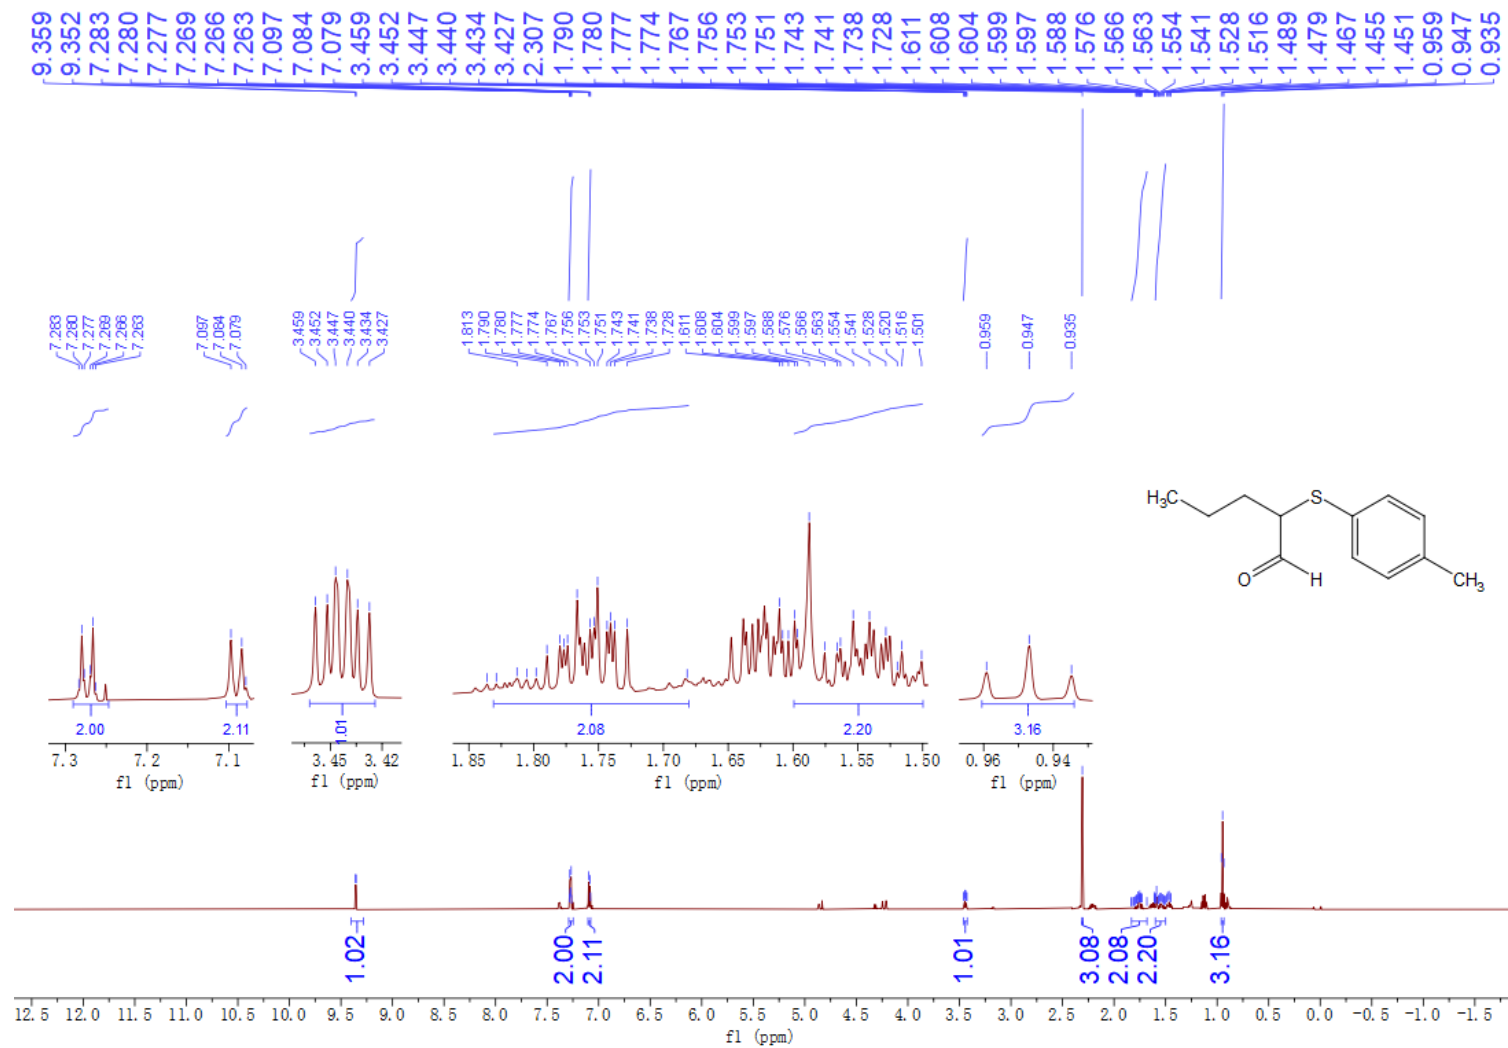

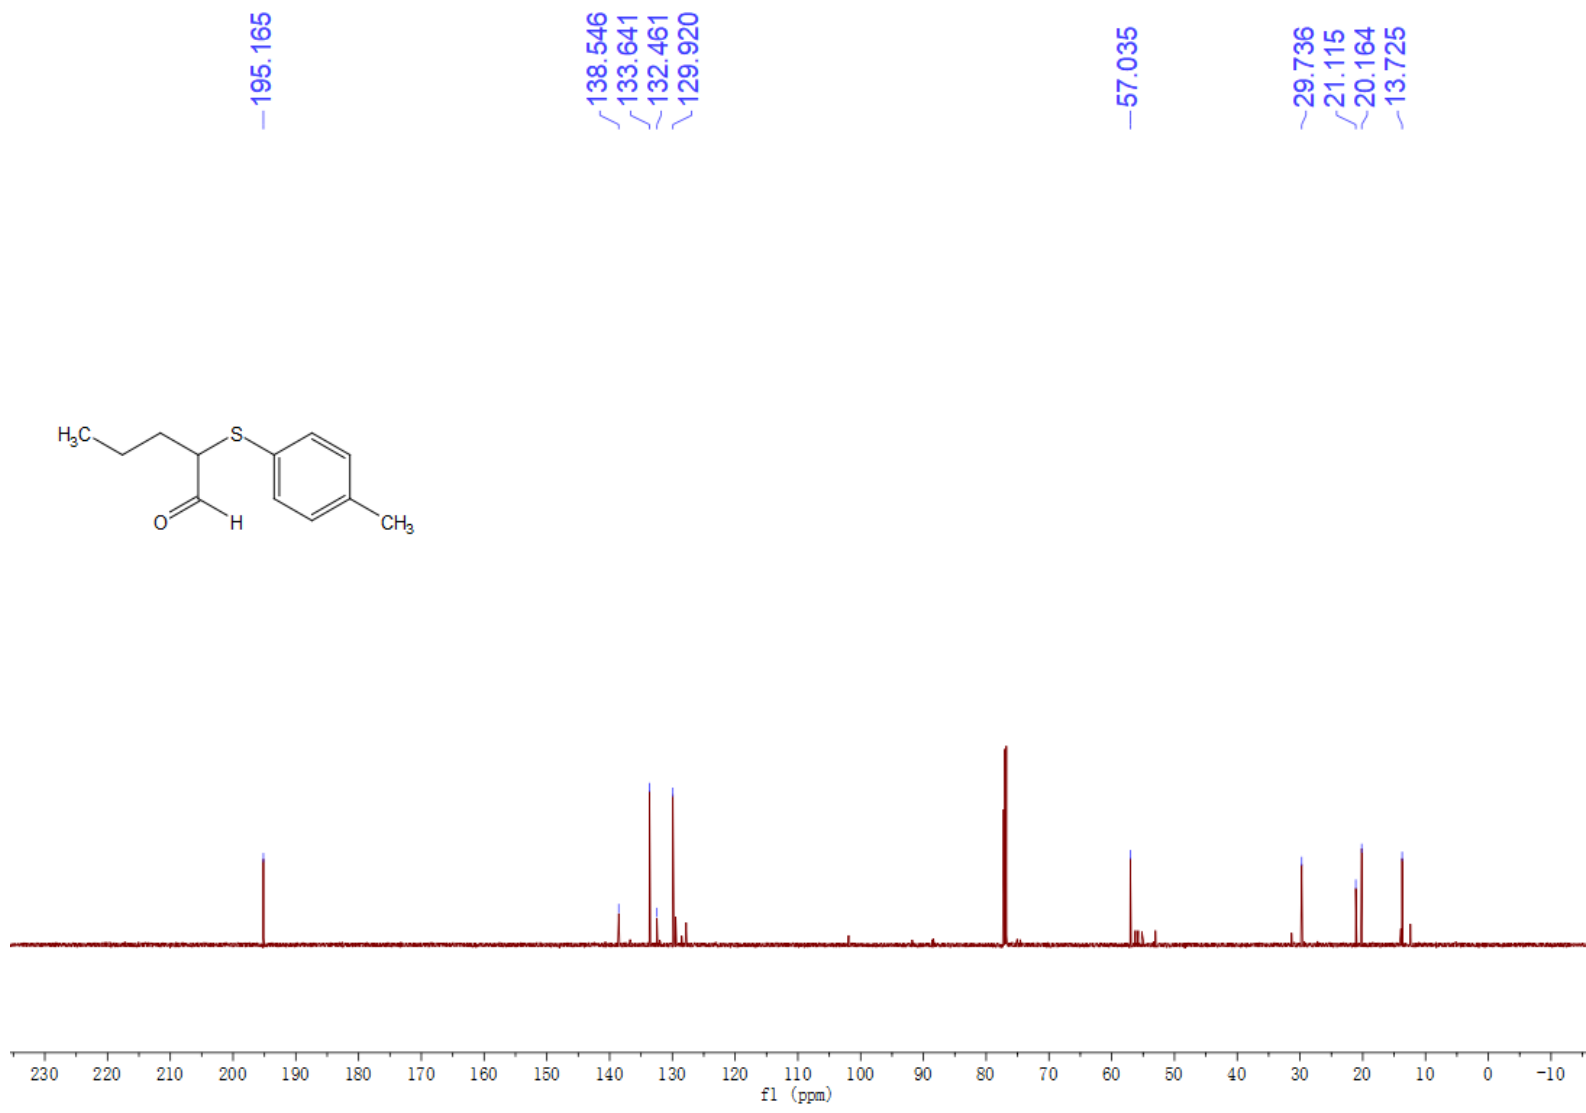

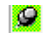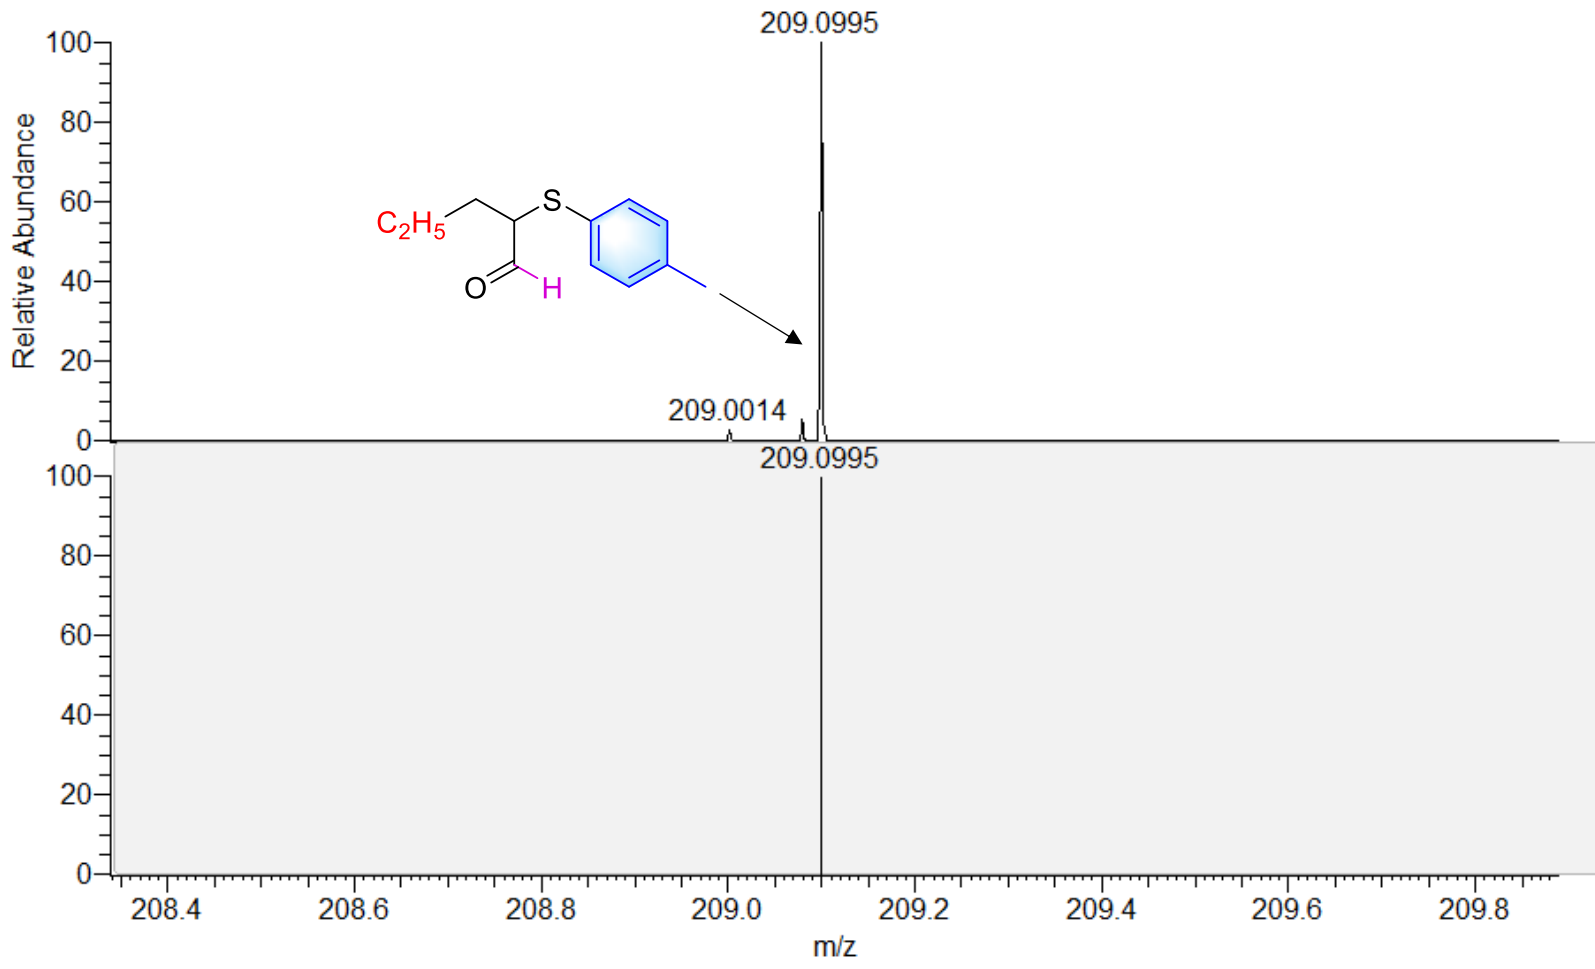

NL:  
8.84E6  
MOUDAN-M21#6  
RT: 0.03 AV: 1 T:  
FTMS + p ESI Full  
lock ms  
[60.0000-900.0000]

NL:  
8.31E5  
C<sub>12</sub> H<sub>16</sub> OS +H:  
C<sub>12</sub> H<sub>17</sub> O<sub>1</sub> S<sub>1</sub>  
pa Chrg 1



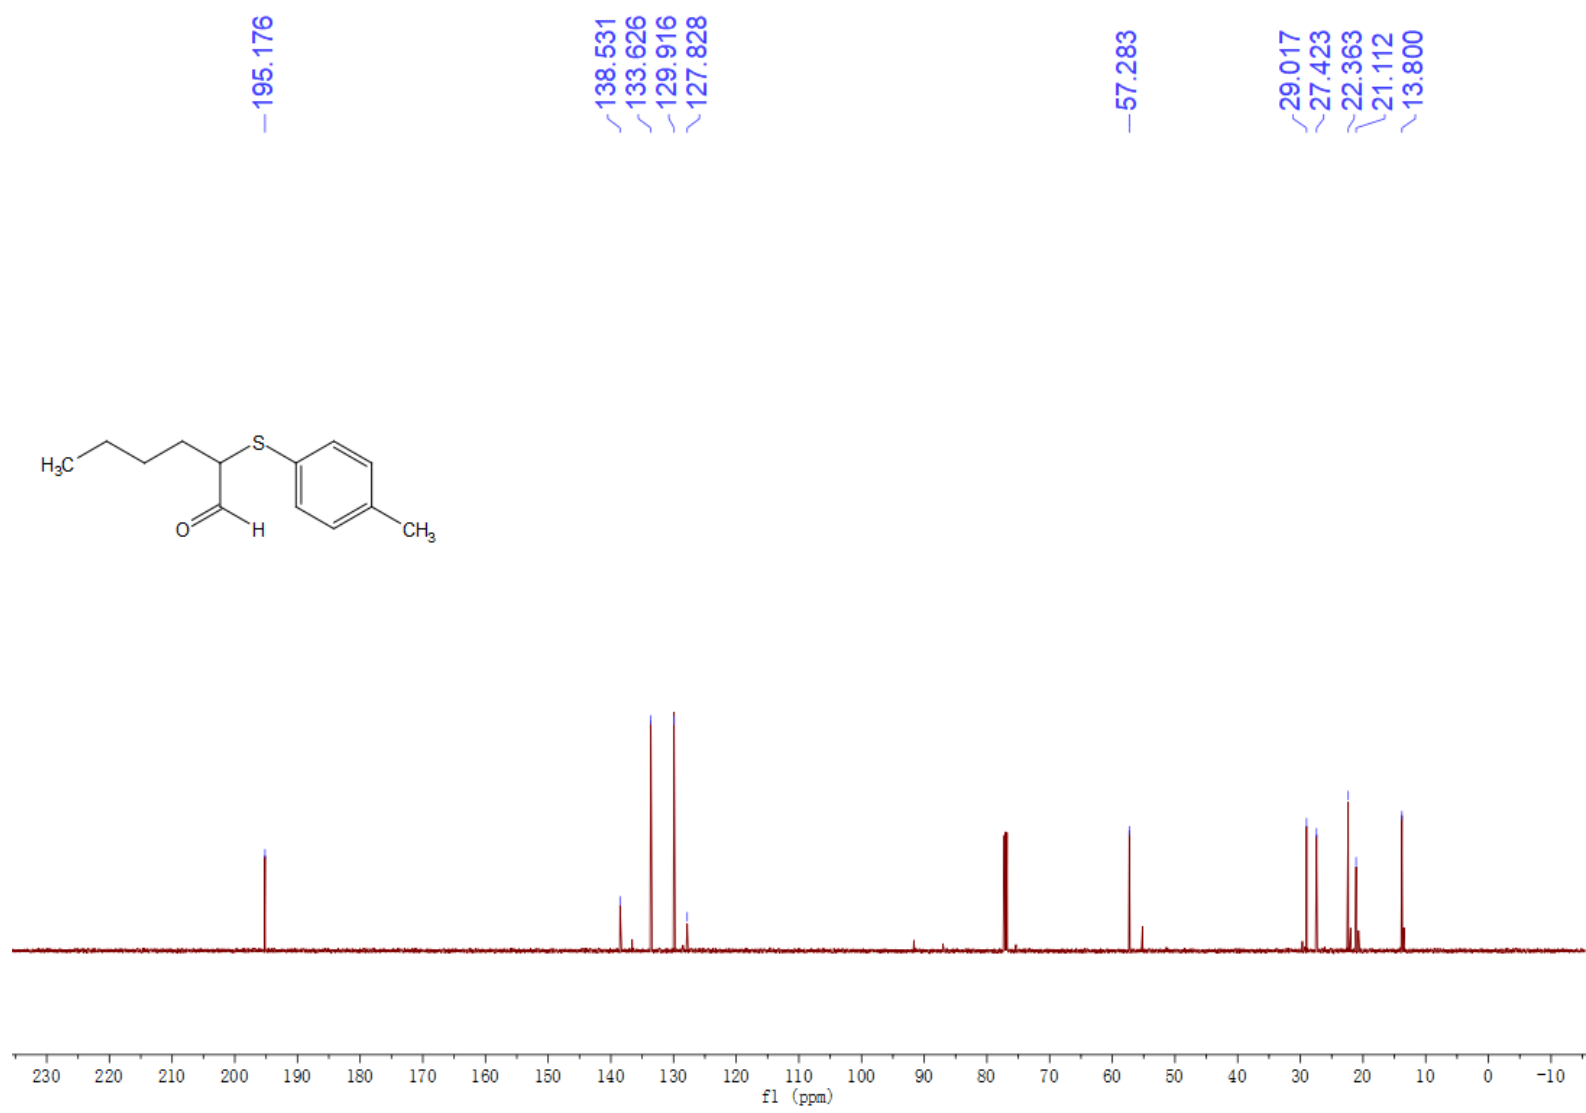

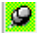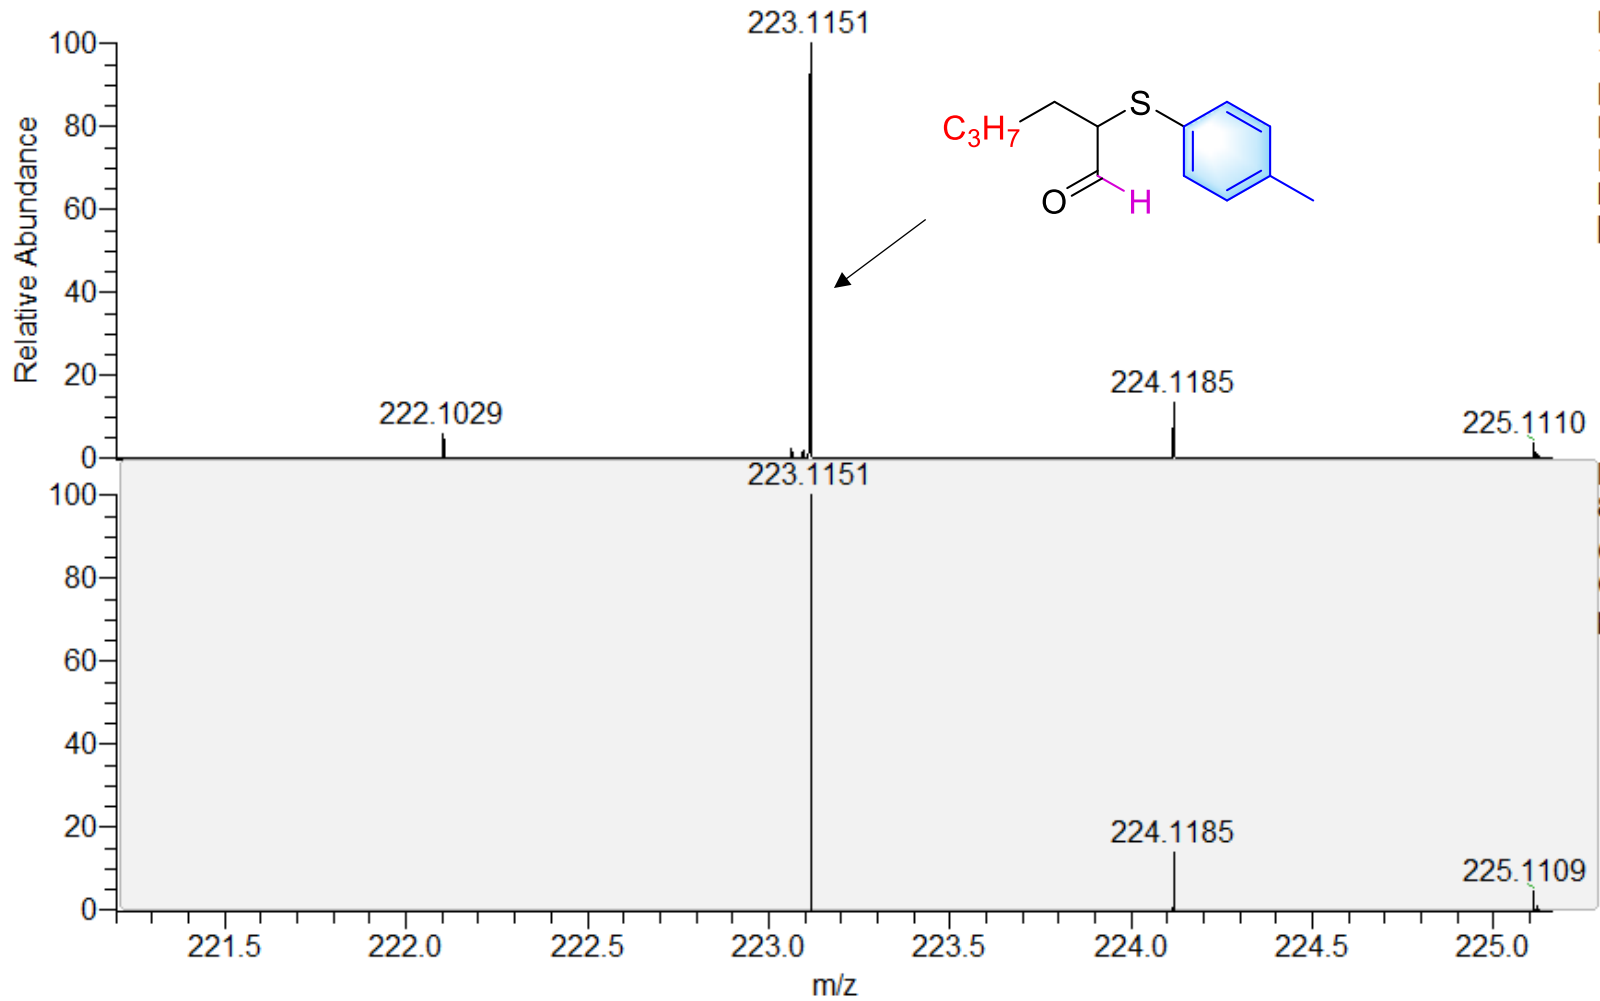

NL:  
1.18E8  
MOUDAN-M57#1  
RT: 0.00 AV: 1 T:  
FTMS + p ESI Full  
lock ms  
[60.0000-900.0000]

NL:  
8.22E5  
C<sub>13</sub> H<sub>18</sub> OS +H:  
C<sub>13</sub> H<sub>19</sub> O<sub>1</sub> S<sub>1</sub>  
pa Chrg 1

2-(*p*-tolylthio)propanal (3dh)

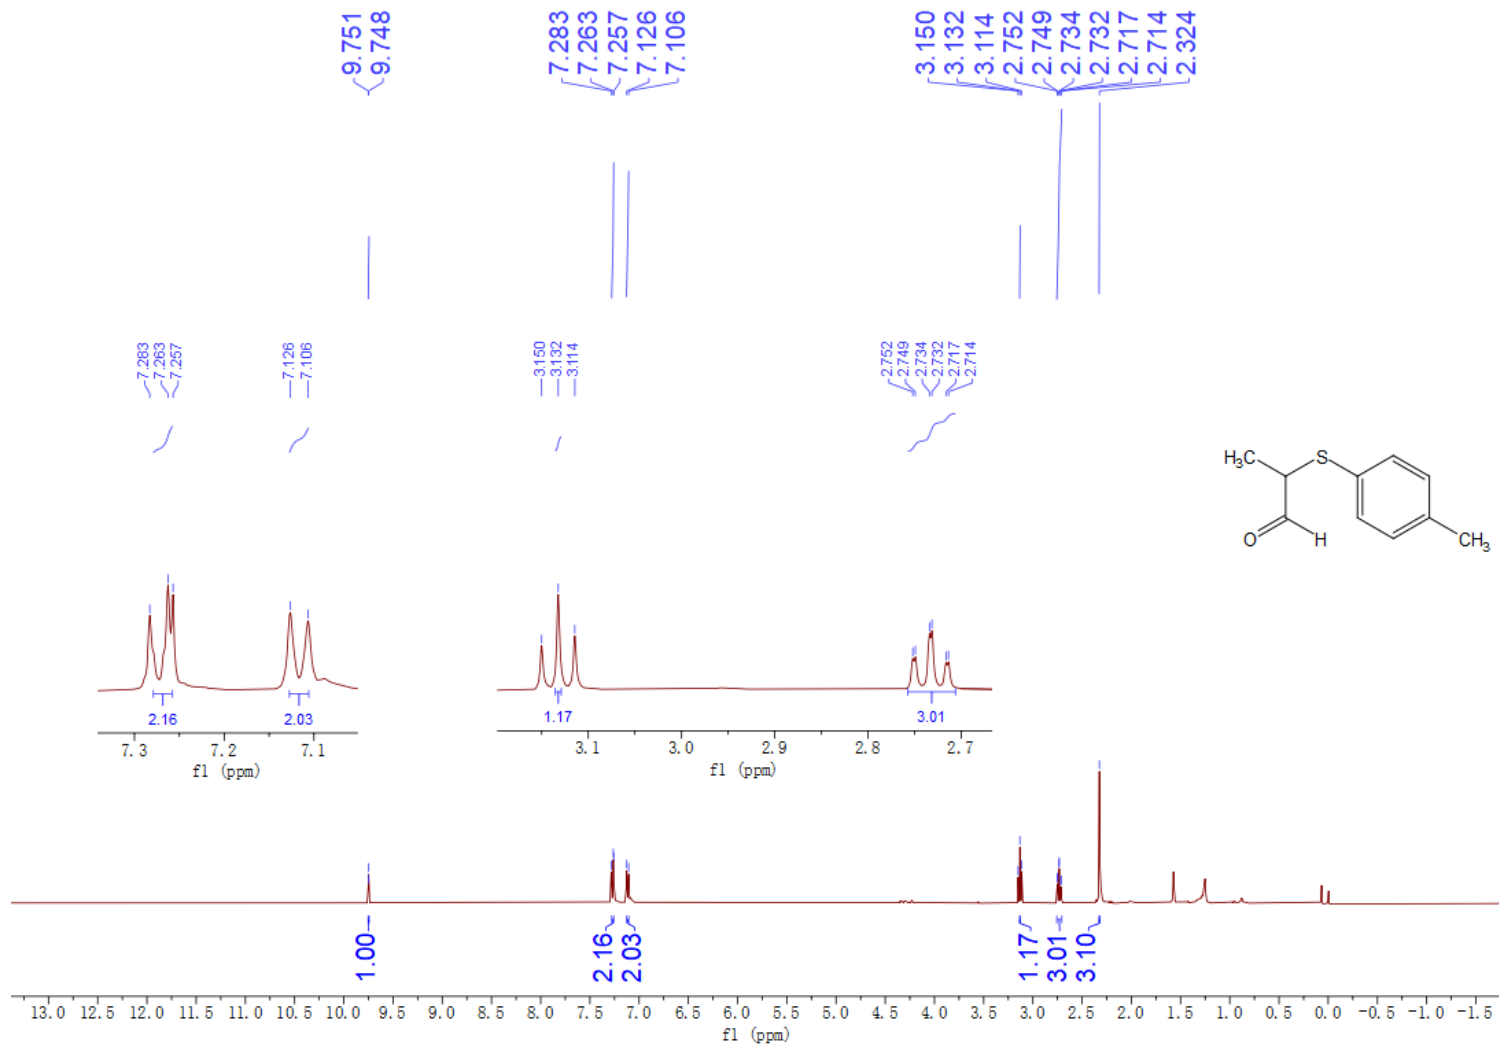

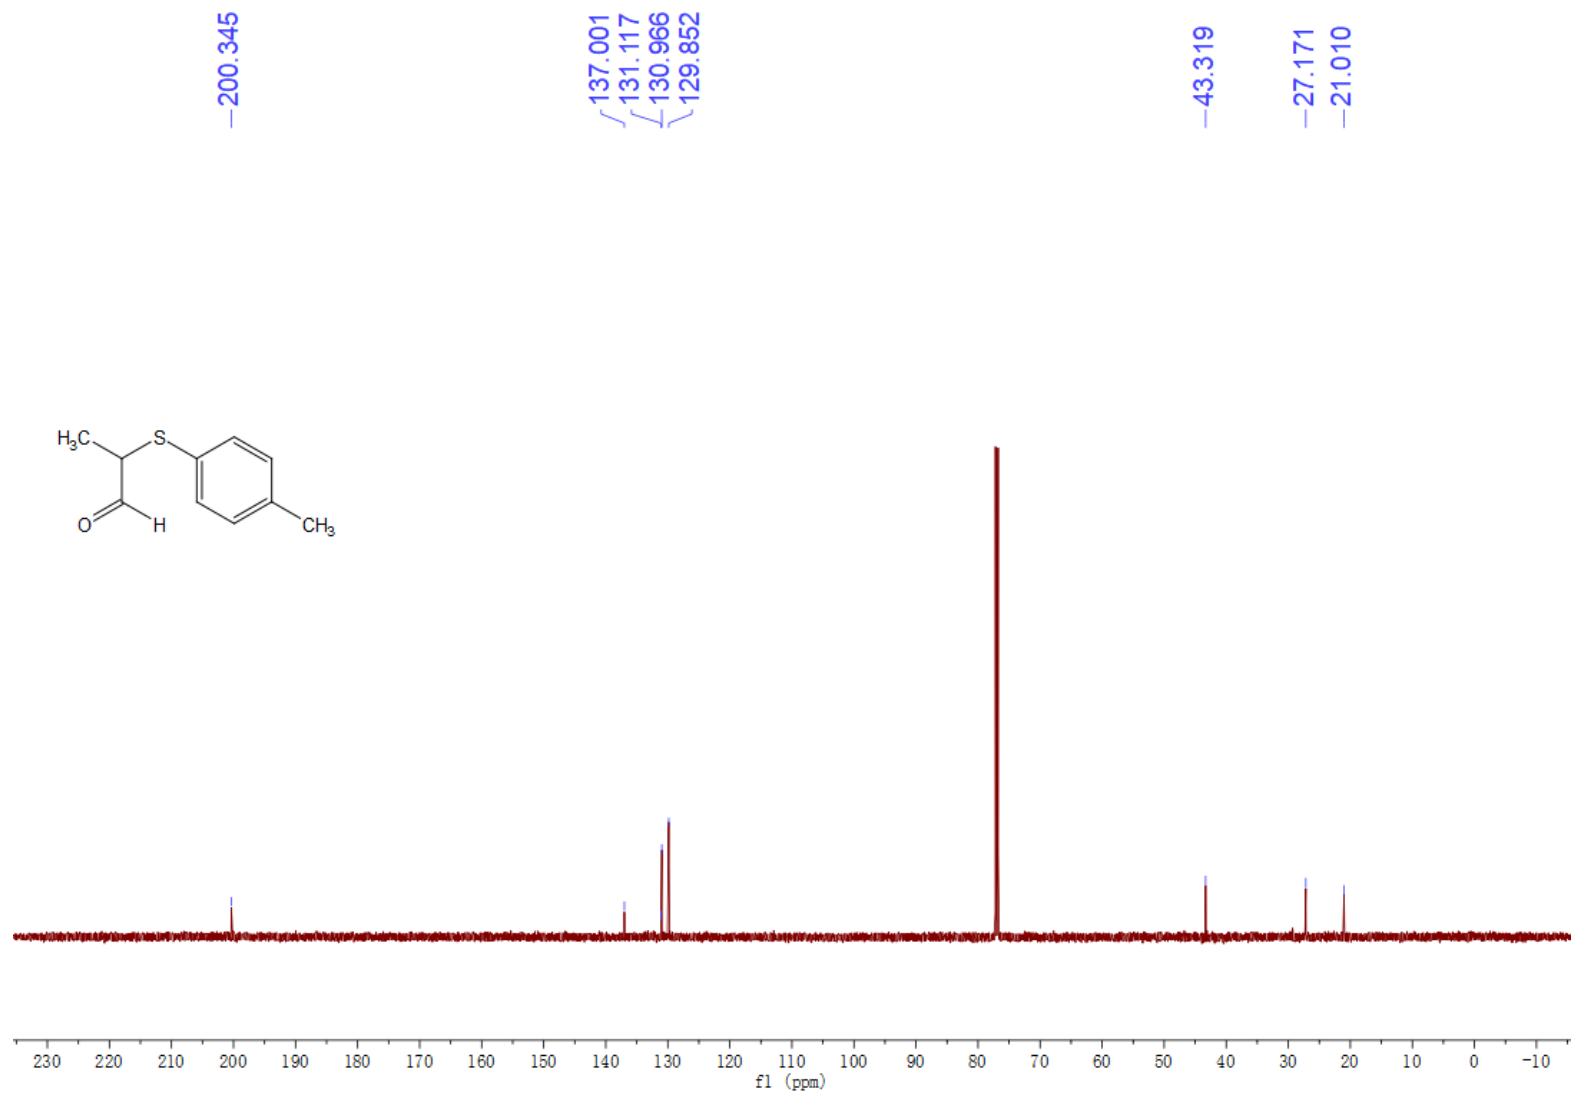



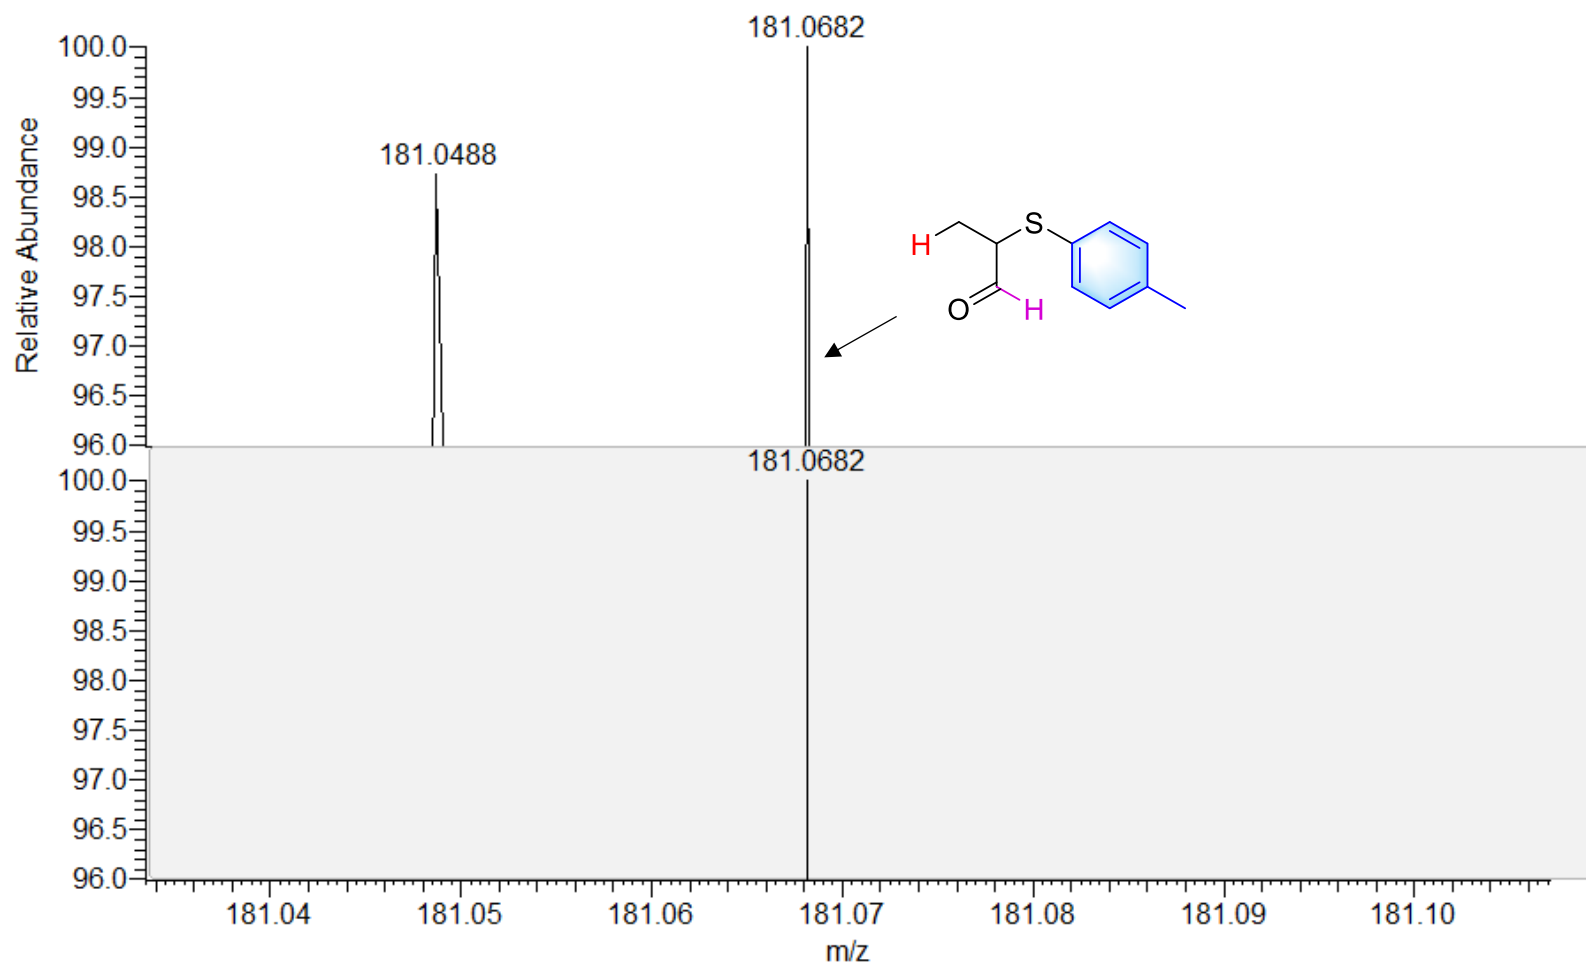

NL:  
 2.26E5  
 MOUDAN-M20#87  
 RT: 0.39 AV: 1 T:  
 FTMS + p ESI Full  
 lock ms  
 [60.0000-900.0000]

NL:  
 8.49E5  
 C<sub>10</sub> H<sub>12</sub> OS +H:  
 C<sub>10</sub> H<sub>13</sub> O<sub>1</sub> S<sub>1</sub>  
 pa Chrg 1

### 3-phenyl-2-(propylthio)propanal (3di)

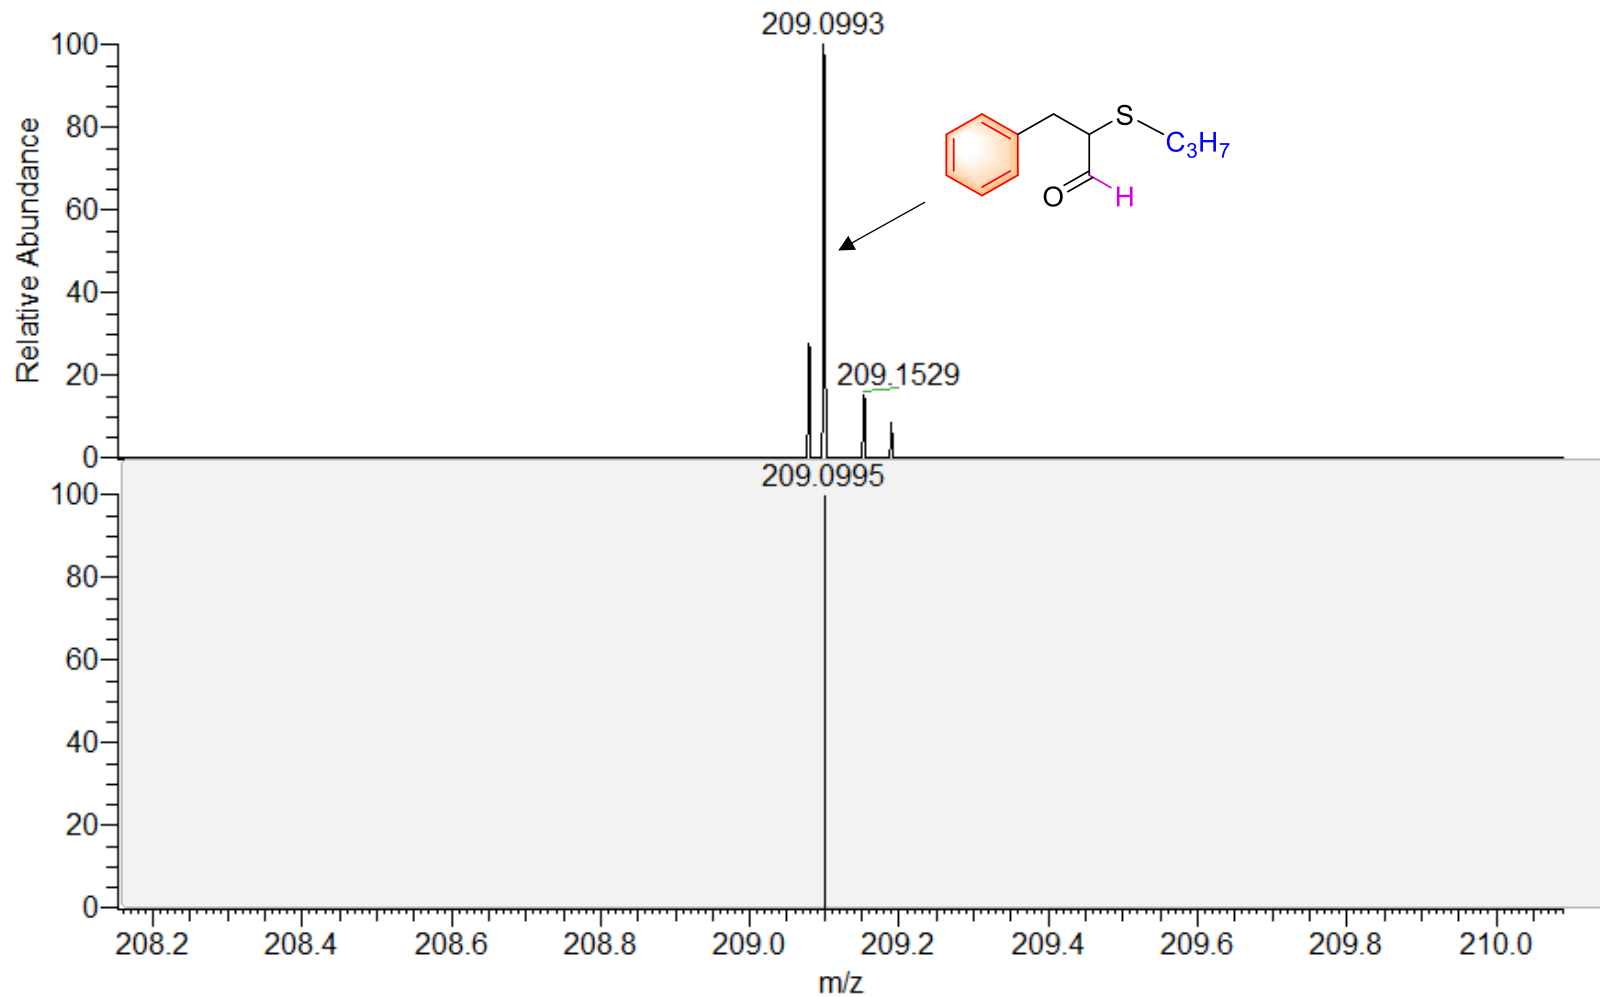

NL:  
8.40E5  
MOUDAN-M55#53  
RT: 0.24 AV: 1 T:  
FTMS + p ESI Full  
ms  
[60.0000-  
900.0000]

NL:  
8.31E5  
C<sub>12</sub> H<sub>16</sub> OS +H:  
C<sub>12</sub> H<sub>17</sub> O<sub>1</sub> S<sub>1</sub>  
pa Chrg 1

2-(dodecylthio)-3-phenylpropanal (3dj)

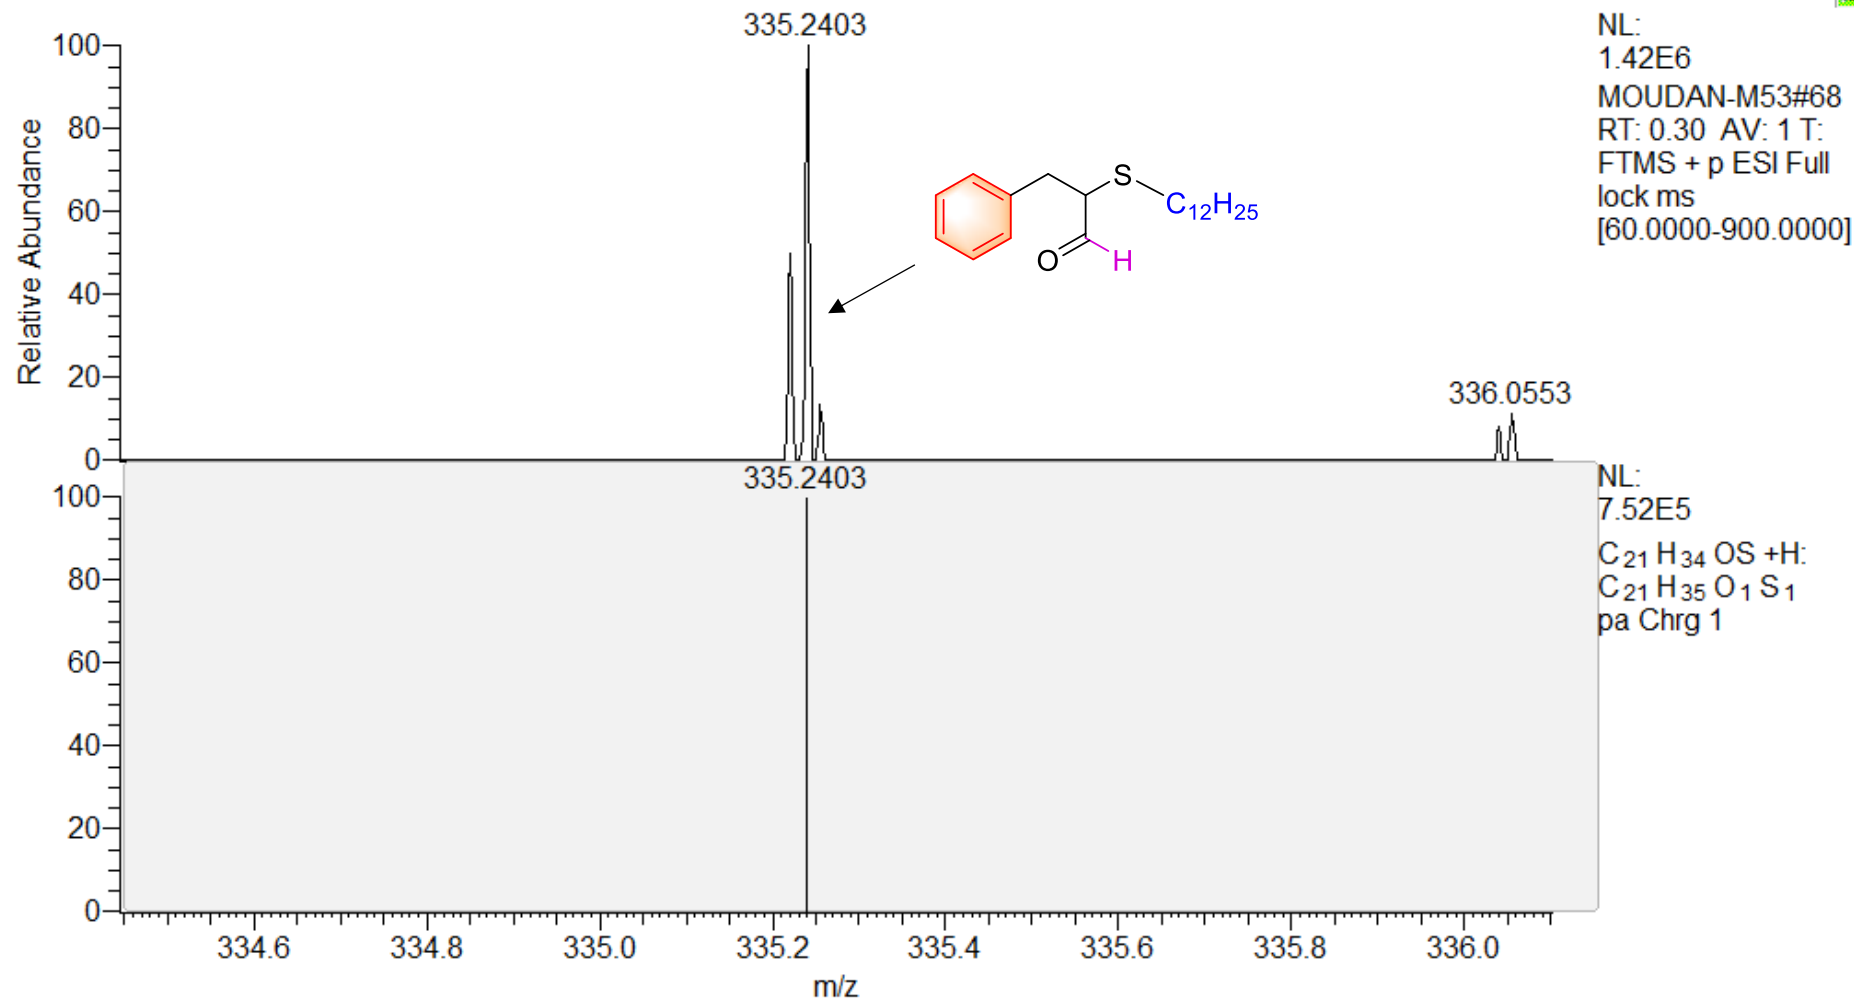

2-(cyclohexylthio)-3-phenylpropanal (3dk)

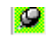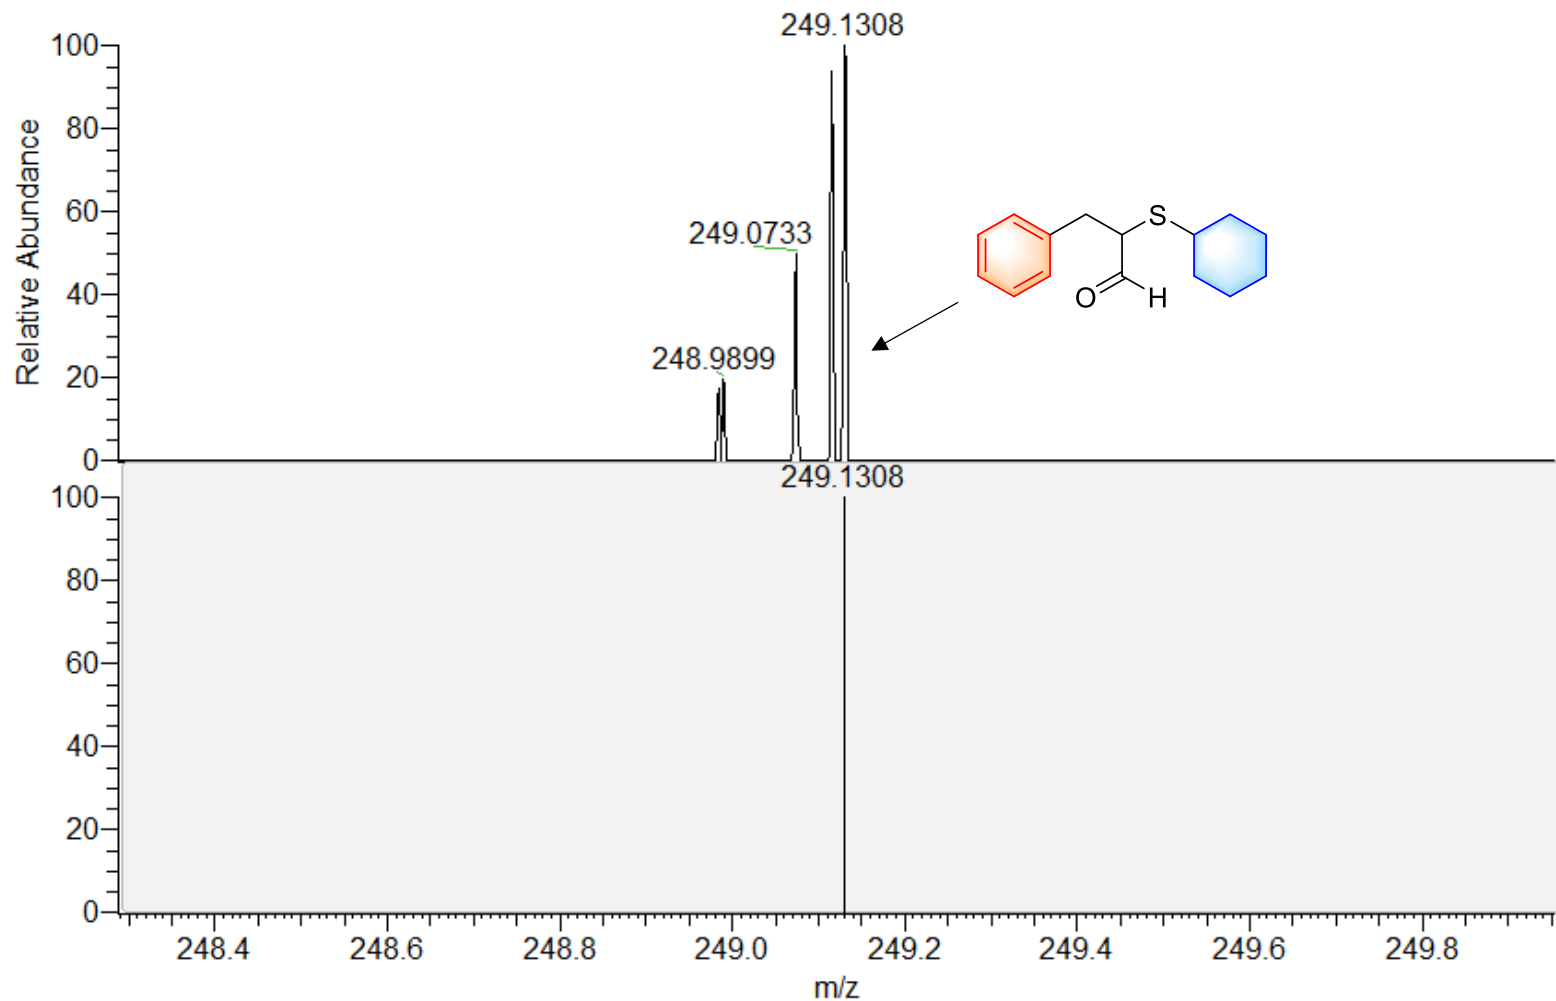

NL:  
5.67E5  
MOUDAN-M54#9  
RT: 0.04 AV: 1 T:  
FTMS + p ESI Full  
lock ms  
[60.0000-900.0000]

NL:  
8.04E5  
C<sub>15</sub> H<sub>20</sub> OS +H:  
C<sub>15</sub> H<sub>21</sub> O<sub>1</sub> S<sub>1</sub>  
pa Chrg 1
